# Supplementary material for: Systematic analysis of transcription start sites in avian development
Source: PLoS Biol. 2017 Sep 5;15(9):e2002887. doi: 10.1371/journal.pbio.2002887 (PMC5600399; doi:10.1371/journal.pbio.2002887)
Supplement: S1 Data — (XLSX) [file pbio.2002887.s022.xlsx]

## Sheet: For Figure 1B
HH stage	Incubation time (in hours)	Log 10 (incubation time)
1	5.5	0.740363
2	6.5	0.812913
3	12.5	1.09691
4	18.5	1.26717
5	20.5	1.31175
6	24	1.38021
7	24.5	1.38917
8	27.5	1.43933
9	31	1.49136
10	35.5	1.55023
11	42.5	1.62839
12	47	1.6721
13	50	1.69897
14	51.5	1.71181
15	52.5	1.72016
16	53.5	1.72835
17	58	1.76343
18	67	1.82607
19	70	1.8451
20	71	1.85126
21	84	1.92428
22	84	1.92428
23	96	1.98227
24	108	2.03342
25	114	2.0569
26	120	2.07918
27	126	2.10037
28	138	2.13988
29	150	2.17609
30	162	2.20952
31	174	2.24055
32	180	2.25527
33	186	2.26951
34	192	2.2833
35	204	2.30963
36	240	2.38021
37	264	2.4216
38	288	2.45939
39	312	2.49415
40	336	2.52634
41	360	2.5563
42	384	2.58433
43	408	2.61066
44	432	2.63548
45	468	2.67025
46	492	2.69197

## Sheet: For Figure3 and FigureS4C
CAGE_peak	Gene_symbol	tpm.chicken%20embryo%20whole%20body%2c%2001hr30min%20%28HH1%29.CNhs12735.10210-103G3.galGal5	tpm.chicken%20embryo%20whole%20body%2c%2005hr30min%20%28HH1%29.CNhs13027.10211-103G4.galGal5	tpm.chicken%20embryo%20whole%20body%2c%2006hr%20%28HH1-2%29.CNhs13028.10212-103G5.galGal5	tpm.chicken%20embryo%20whole%20body%2c%2014hr%20%28HH3%29.CNhs13029.10213-103G6.galGal5	tpm.chicken%20embryo%20whole%20body%2c%2018hr%20%28HH4%29.CNhs13030.10214-103G7.galGal5	tpm.chicken%20embryo%20whole%20body%2c%2022hr%20%28HH5-6%29.CNhs12736.10215-103G8.galGal5	tpm.chicken%20embryo%20whole%20body%2c%20day01%20%28HH7%202-3%20somites%29.CNhs14200.10217-103H1.galGal5	tpm.chicken%20embryo%20whole%20body%2c%20day01%2e5%20%28HH11-12%29.CNhs14201.10219-103H3.galGal5	tpm.chicken%20embryo%20whole%20body%2c%20day02%20%28HH14%29.CNhs14202.10221-103H5.galGal5	tpm.chicken%20embryo%20whole%20body%2c%20day03%20%28HH19%29.CNhs14203.10223-103H7.galGal5	tpm.chicken%20embryo%20whole%20body%2c%20day04%20%28HH23%29.CNhs14204.10225-103H9.galGal5	tpm.chicken%20embryo%20whole%20body%2c%20day05%20%28HH25-27%29.CNhs14208.10234-103I9.galGal5	tpm.chicken%20embryo%20whole%20body%2c%20day07%20%28HH32%29.CNhs14205.10227-103I2.galGal5	tpm.chicken%20embryo%20whole%20body%2c%20day10%20%28HH37%29.CNhs10485.10004-101A9.galGal5	tpm.chicken%20embryo%20whole%20body%2c%20day15%20%28HH41%29.CNhs14206.10228-103I3.galGal5	tpm.chicken%20embryo%20whole%20body%2c%20day20%20%28HH45%29.CNhs14207.10229-103I4.galGal5
chr1:181414924..181414938,-	GRIA4	0.0807089	0.318678	0	0	0	0	0	0	0	0.245807	0.290428	0	13.324	11.895	18.7406	28.151
chr1:75918671..75918692,-	NANOG	2227.24	1336.85	1753.31	878.236	436.832	318.183	276.289	20.2589	28.4994	0	0.290428	0	0	0	0	0
chr17:953166..953200,-	Pou5f3	951.397	579.037	920.044	946.432	811.344	913.164	773.322	67.5298	51.9879	1.72065	20.33	4.15481	0	0	0	0
chr19:4939804..4939808,-	ASL1	0	0	0	0.488859	0.298179	0.210068	0.480922	0.293608	0.62636	52.1111	83.353	86.7317	239.364	273.584	318.591	174.536
chr2:139845719..139845735,+	MYC	840.825	323.777	402.951	248.585	269.852	275.259	358.287	135.353	144.376	78.1667	67.089	59.2061	30.8555	43.8516	24.3628	26.2743
chr2:38744146..38744159,-	EOMES	440.267	156.471	160.849	87.5058	28.9233	26.8887	10.0994	0	0	0	0.580857	0.519352	1.16877	0.710148	0	0
chr2:65884515..65884526,-	CDYL.2	26.8761	5.09884	4.69833	1.71101	0.298179	1.19038	0.721382	0	0.31318	0	0	0.519352	0	0	0	0
chr2:65884541..65884553,-	CDYL.2	24.2934	4.46149	2.21098	2.19987	0.298179	0.630203	0.480922	0	0	0	0.290428	0	0	0	0	0
chr2:65884569..65884570,-	CDYL.2	3.95474	0.956033	1.10549	0.24443	0	0.28009	0	0	0	0	0	0	0	0	0	0
chr2:65884600..65884623,-	CDYL.2	163.355	48.1203	41.4559	28.3538	21.767	28.8493	20.6796	6.16576	5.95042	0.245807	3.77557	4.15481	0.233754	0.177537	0	0.469184
chr2:65884651..65884661,-	CDYL.2	7.18309	1.27471	1.93461	0.977719	1.49089	3.08099	2.40461	1.17443	0.31318	0	0	0	0	0	0	0
chr2:65914305..65914312,-	CDYL.1	2.58269	1.27471	1.10549	0.24443	0.596357	1.33043	0.480922	0.587216	0.31318	0.491614	1.74257	0.519352	0.467507	1.24276	0	0
chr2:65914319..65914388,-	CDYL.1	53.1872	21.0327	18.517	18.8211	16.3998	28.4292	30.5385	14.6804	20.3567	17.9439	14.5214	8.82898	16.3628	24.5001	3.74813	19.7057
chr20:2748934..2748940,-	MYH7B	0	0	0	0	0.298179	0	0	0.880823	0.31318	0.737422	0.580857	2.59676	10.7527	36.7501	166.792	183.451
chr22:256050..256053,-	GKN1	0	0	0	0	0	0	0	0	0	0	0.290428	4.15481	0.935015	0.355074	912.669	1734.57
chr27:1470042..1470047,-	GFAP	0	0	0	0	0	0	0	0	0	0	0	0	0	0.177537	52.4738	193.304
chr4:2017569..2017596,-	PLP1	0	0	0.829117	0.488859	0.298179	0.980316	0	0	0	0	0	2.59676	2.33754	3.19566	408.546	862.828
chr4:51168564..51168567,+	ALB	0	0	0	0	0	0	0	1.17443	4.38452	23.8433	194.297	225.918	1001.87	1904.62	702.774	5959.57
chr4:5232213..5232242,-	TNMD	0.0807089	0	0	0	0	0.0700226	0	0	0	0	0.290428	1.55806	19.1678	35.6849	56.2219	39.8806
chr5:14044424..14044442,-	TNNT3	0	0	0	0	0	0.210068	0.240461	0	0	1.22904	3.48514	8.30963	53.0621	194.58	174.288	976.84
chr5:23447058..23447086,-	F2	0	0	0	0.24443	1.49089	2.94095	4.32829	72.2275	91.4486	205.986	188.198	122.048	77.1387	90.3663	327.961	480.913
chr6:2373203..2373218,+	LDB3	0.0807089	0.318678	0	0	0	0.420135	0.480922	1.76165	3.44498	4.67034	2.61386	6.23222	38.1018	85.5728	586.582	1007.34
chr7:5611495..5611516,+	SPP2	0	0	0	0	0	0	0.240461	0	0	0	0.580857	3.11611	100.514	74.9206	39.3553	48.7951

## Sheet: For Figure4 and FIgureS6
gene	id	log2tpm.Aortic Smooth Muscle cells; donor1	log2tpm.Aortic Smooth Muscle cells; donor2	log2tpm.Aortic Smooth Muscle cells; donor3	log2tpm.chicken embryo whole body; 01hr30min (HH1)	log2tpm.chicken embryo whole body; 05hr30min (HH1)	log2tpm.chicken embryo whole body; 06hr (HH1-2)	log2tpm.chicken embryo whole body; 14hr (HH3)	log2tpm.chicken embryo whole body; 18hr (HH4)	log2tpm.chicken embryo whole body; 22hr (HH5-6)	log2tpm.chicken embryo whole body; day01 (HH7 2-3 somites)	log2tpm.chicken embryo whole body; day01.5 (HH11-12)	log2tpm.chicken embryo whole body; day02 (HH14)	log2tpm.chicken embryo whole body; day03 (HH19)	log2tpm.chicken embryo whole body; day04 (HH23)	log2tpm.chicken embryo whole body; day05 (HH25-27)	log2tpm.chicken embryo whole body; day07 (HH32)	log2tpm.chicken embryo whole body; day10 (HH37)	log2tpm.chicken embryo whole body; day15 (HH41)	log2tpm.chicken embryo whole body; day20 (HH45)	log2tpm.chicken embryo; extraembryonic tissue; day07 (HH32)	log2tpm.chicken embryo; extraembryonic tissue; day15 (HH41)	log2tpm.chicken leg buds; day03 (HH20)	log2tpm.chicken wing buds; day03 (HH20)	log2tpm.hepatocytes; tech_rep1	log2tpm.hepatocytes; tech_rep2	log2tpm.Mesenchymal stem cells - bone marrow derived; donor1	min.tpm	var	sd	min.log2.tpm	max.log2.tpm	mean.log2.tpm	FC.max	FC.min
IK	ENSGALT00000064783.1	5.40353	5.64745	5.54551	5.66209	5.44965	5.89032	5.67548	5.87889	5.47522	5.73932	5.82745	5.50689	5.60545	5.36033	5.33881	5.51245	5.3927	5.68929	5.59656	6.04072	5.38611	5.55047	5.93526	5.16024	5.11332	5.31868	33.615	0.0540382	0.232461	5.11332	6.04072	5.56547	1.08539	1.08842
EIF3K	ENSGALT00000068703.1	7.96874	7.92711	8.04919	7.69552	7.35899	7.9974	7.87302	7.81143	7.84401	8.11274	8.194	8.06517	8.04581	8.2281	8.26649	7.94099	7.62206	7.61399	8.49531	8.365	7.56826	7.8513	7.60012	7.94892	8.07855	7.64989	163.163	0.0725291	0.269312	7.35899	8.49531	7.9297	1.07133	1.07755
EIF3I	ENSGALT00000067905.1	7.95645	7.60405	7.77979	8.22972	7.5428	7.94011	7.97324	7.90414	7.86279	7.73855	7.86206	7.54228	7.52455	7.62446	7.25409	7.43693	7.5099	7.27308	7.3434	8.11132	7.16861	7.70248	7.04178	7.71118	7.43904	7.54436	130.761	0.0868506	0.294704	7.04178	8.22972	7.63928	1.07729	1.08485
FBXW2	ENSGALT00000001266.2	5.03848	4.86983	4.86425	5.8291	4.84423	5.35041	5.31703	5.39742	5.59709	5.41277	5.04454	5.25808	4.8468	4.99029	5.09755	4.59345	5.0425	5.33469	4.91118	5.57528	5.19838	4.61305	4.80645	5.21527	5.19535	5.28413	23.1416	0.0915775	0.302618	4.59345	5.8291	5.13568	1.13502	1.11804
MED21	ENSGALT00000044701.2	5.60587	5.84495	5.98875	6.04375	5.14638	5.49888	5.44396	5.42771	5.72483	5.81522	5.70287	6.0879	5.66956	5.84884	5.52931	5.72501	5.71385	5.11824	5.62427	5.40914	5.8361	5.88169	6.20251	5.63409	5.00832	5.22707	31.185	0.0917947	0.302976	5.00832	6.20251	5.64458	1.09884	1.12704
RPL7	ENSGALT00000066511.1	10.2793	9.80756	10.0368	9.64709	9.4417	9.90732	9.96011	9.9609	9.93981	9.84518	10.2559	9.94629	10.0295	10.0125	10.0736	10.1314	10.0248	10.2627	10.6552	10.6868	9.50293	10.3752	10.2246	10.0637	9.74752	9.60864	694.399	0.0922772	0.303772	9.4417	10.6868	10.0164	1.06693	1.06087
SAP18	ENSGALT00000057154.1	7.31788	7.26644	7.35321	7.59492	7.14503	7.41992	7.3557	7.38702	7.41798	7.2729	7.19603	7.35626	7.24955	7.05685	7.01435	6.80477	6.78843	6.3167	7.05864	7.30872	6.45519	7.17936	7.19268	6.96281	6.74839	7.4194	78.7106	0.0940206	0.306628	6.3167	7.59492	7.13997	1.06372	1.13033
RALGAPB	ENSGALT00000002165.4	3.91627	4.33058	4.34602	4.73253	3.74722	4.22403	4.15912	4.47058	4.71579	4.81619	4.14858	4.35171	3.78471	4.18073	4.09592	3.58333	4.20153	4.15919	3.95835	4.44269	4.02745	3.69771	3.7499	4.1444	4.20281	4.44474	10.9864	0.1029	0.32078	3.58333	4.81619	4.17816	1.15271	1.166
DERL2	ENSGALT00000046803.1	5.04693	4.85525	4.83493	5.1678	4.74486	5.25966	5.00192	5.11662	4.89624	5.437	5.40595	5.43561	5.09525	5.16396	5.3572	4.93954	4.4907	5.52286	5.08078	5.75922	4.98252	4.91743	4.44332	5.71269	5.3466	5.08978	20.7557	0.105852	0.325349	4.44332	5.75922	5.11941	1.12498	1.15216
SNX4	ENSGALT00000019689.5	5.22881	5.02126	5.4129	5.14494	4.54272	4.7239	4.47673	4.93167	5.13632	4.82846	5.35511	5.28151	5.31606	5.28711	5.3013	5.42095	5.42882	5.46282	5.55397	5.81011	5.38611	5.467	5.66714	5.16024	5.19535	5.61957	21.2654	0.106925	0.326994	4.47673	5.81011	5.23696	1.10945	1.16982
CCNDBP1	ENSGALT00000076899.1	5.75262	5.19351	5.6104	5.94136	5.19739	5.61732	5.49958	5.77273	5.92099	6.03218	5.7587	6.14008	5.77694	5.83422	5.93652	5.28051	5.25862	6.28238	6.41706	5.74184	5.55219	5.56514	6.07506	6.24944	6.01313	5.86373	35.5932	0.10932	0.330636	5.19351	6.41706	5.78014	1.11019	1.11296
PSMC6	ENSGALT00000020277.5	7.16708	6.87274	6.95934	7.53716	6.88209	7.33357	7.21088	7.47427	7.72108	7.58802	7.28019	7.07725	7.04187	6.94568	7.21428	6.60793	6.6371	7.04641	6.96963	7.45981	6.36875	7.13825	7.04178	6.65973	6.63539	6.82749	81.6391	0.112663	0.335653	6.36875	7.72108	7.0653	1.09282	1.10937
POLDIP3	ENSGALT00000019356.4	6.47675	6.53112	6.46448	7.25943	6.38985	6.90497	6.62245	6.47996	6.74637	6.56651	6.49596	6.28618	6.15585	6.13179	6.50538	6.27931	6.23966	6.21118	6.20405	6.48896	5.55219	6.50106	6.16127	6.19572	5.71246	6.66782	45.922	0.115306	0.339567	5.55219	7.25943	6.39349	1.13544	1.15153
ZMAT2	ENSGALT00000064754.1	6.28642	6.03815	6.31323	7.29694	6.44893	6.75799	6.81327	6.98677	7.16134	6.83005	6.62602	6.69659	6.46371	6.35295	6.07632	6.87253	6.31879	6.56534	6.08944	6.71055	6.1786	6.97618	6.24261	6.67943	6.32876	6.46684	64.715	0.115535	0.339905	6.03815	7.29694	6.56068	1.11222	1.08654
NAA20	ENSGALT00000020554.5	7.06881	7.08454	7.2102	7.24338	6.45942	6.8916	6.88663	7.04656	7.23762	6.70927	7.00809	6.84153	6.70375	6.83259	6.77537	6.63532	6.87826	6.56534	6.92019	7.2111	6.07322	7.05105	6.92342	7.88247	7.43229	6.76873	66.3318	0.117401	0.342638	6.07322	7.88247	6.93618	1.13643	1.14209
H3F3C	ENSGALT00000031956.4	8.52933	8.88249	8.7308	8.44548	7.78925	8.4028	8.56656	8.75345	8.73649	8.61556	8.35013	8.57796	8.65953	8.86051	9.19168	8.82064	9.09754	8.72975	8.76174	9.75041	8.52504	8.61161	8.84455	8.7916	8.56091	8.3507	220.206	0.118743	0.344591	7.78925	9.75041	8.68987	1.12204	1.11562
SMIM15	NM_001199231	5.5174	5.10995	5.25951	5.84134	5.19739	5.60918	5.53043	5.21255	5.57607	5.32029	5.70287	5.64873	5.53071	5.72756	5.32017	5.29776	5.28514	5.52286	5.98644	5.75922	6.1786	5.0485	5.09631	6.08188	5.45713	6.42622	32.0941	0.12231	0.349728	5.0485	6.42622	5.54786	1.15833	1.09891
CRK	ENSGALT00000004183.4	5.17584	5.34736	5.06279	5.89516	4.84423	5.33073	5.01288	5.29156	5.8562	5.30282	5.34472	5.02818	5.05314	5.14039	5.42853	5.17245	5.38045	4.3031	4.66662	5.24619	4.4202	5.14443	5.18129	5.21527	5.45713	5.19022	18.7406	0.122539	0.350056	4.3031	5.89516	5.17276	1.13965	1.2021
MED30	ENSGALT00000078115.1	5.83302	6.00549	5.98875	5.85347	5.34042	5.67309	5.43584	5.69182	5.51552	5.83358	6.14129	6.24508	6.02037	5.96742	6.10926	5.42095	5.34937	5.33469	5.84051	6.40315	4.72859	5.77846	5.78043	5.59313	5.53481	5.72121	25.5122	0.124523	0.352878	4.72859	6.40315	5.73614	1.11628	1.21308
PPP1R3E	ENSGALT00000005527.4	5.79839	5.05994	5.72671	6.01163	5.32903	5.60918	5.63347	5.55212	5.62806	5.95599	5.71098	5.78608	5.39403	5.28711	5.46291	4.63476	5.08084	4.86349	5.13957	5.29465	6.07322	5.5169	5.09631	5.31941	5.36089	5.71084	23.8429	0.12481	0.353284	4.63476	6.07322	5.46294	1.11171	1.17869
VAPA	ENSGALT00000053361.1	7.49204	7.62999	7.7142	8.06644	7.30186	7.62167	7.73085	7.66651	8.00052	7.86148	7.9279	8.09852	8.42379	8.28025	7.61292	8.18299	7.89597	8.57529	8.57202	8.44233	8.16358	7.81647	7.45407	8.44539	8.04797	7.97851	156.789	0.126273	0.355349	7.30186	8.57529	7.96167	1.07707	1.09036
COPS4	ENSGALT00000018144.4	6.41932	6.03815	6.25539	6.845	5.4391	5.92354	6.03407	5.88618	6.15447	5.89317	6.08	5.92641	5.76395	5.87048	5.49649	5.91584	5.82646	5.58049	5.76784	5.67018	4.98252	6.13623	5.98338	5.36879	5.79896	6.01887	30.6147	0.128175	0.358015	4.98252	6.845	5.88751	1.16263	1.18163
GOSR1	ENSGALT00000006898.5	5.16811	5.15829	5.04582	6.06304	4.87589	4.99791	4.96852	4.60039	5.16757	5.00088	5.05731	5.02818	4.88331	4.76227	5.0755	4.41526	4.78819	5.03822	5.28555	5.1703	5.19838	4.58453	4.13787	5.41653	5.28799	5.21244	16.6045	0.128773	0.35885	4.13787	6.06304	5.01493	1.209	1.21196
AP1G1	ENSGALT00000001245.5	5.42315	5.4577	5.37944	6.40695	5.44965	5.5423	5.78186	6.10196	6.38226	5.92206	5.6363	5.59366	5.66258	5.65457	5.74024	5.35656	5.71385	4.9535	5.52487	5.5152	4.72859	5.47479	5.54419	5.26828	5.43028	5.47389	25.5122	0.129316	0.359606	4.72859	6.40695	5.58149	1.14789	1.18037
VTA1	ENSGALT00000022415.5	6.13607	6.39151	6.36201	6.16067	6.02357	5.94958	5.87493	5.95714	6.07727	6.72247	5.83489	6.4346	5.95327	6.2576	6.69087	5.86467	5.75237	6.35023	6.97502	6.91814	6.36875	5.65703	5.93526	6.22283	5.71246	6.61598	49.4585	0.134599	0.366877	5.65703	6.97502	6.19997	1.12501	1.09598
COG2	ENSGALT00000018104.5	4.57218	4.54573	4.90244	5.1903	4.56231	5.23869	4.58354	4.9175	4.93308	4.84061	4.63123	4.53828	4.35182	4.92283	4.33743	3.97512	4.3596	3.61405	4.12279	4.64315	4.4202	4.06072	4.69526	4.62271	4.79337	4.52978	11.2444	0.134755	0.36709	3.61405	5.23869	4.57326	1.14551	1.26541
API5	ENSGALT00000061756.1	6.17901	5.85232	6.06228	6.86412	6.11264	6.42832	6.29882	6.57326	6.84193	7.14639	6.45309	6.50593	6.16081	6.19607	6.48042	5.70576	5.94761	5.8385	6.40912	6.53003	5.70112	5.98623	6.07506	5.89228	5.86059	6.35144	51.0245	0.136387	0.369307	5.70112	7.14639	6.2482	1.14375	1.09596
ARFIP1	ENSGALT00000065974.1	5.01282	4.91273	4.92116	4.97394	4.60071	4.85368	4.89931	4.9457	5.04134	5.10534	4.97889	4.55759	4.53123	4.79282	4.9356	4.2655	4.30881	4.5539	5.26809	5.4525	5.19838	3.95329	4.13787	4.44992	4.54071	5.21977	14.4903	0.136647	0.369657	3.95329	5.4525	4.78506	1.13948	1.2104
MKL2	g3571.t1	4.43722	3.91835	3.52949	5.27092	4.30757	4.4043	4.49248	4.52765	4.90974	4.32167	3.7682	4.41662	3.95444	4.08522	4.26133	4.11792	4.68244	4.5539	4.63972	4.354	4.72859	4.44079	4.69526	4.70191	4.38163	4.02676	10.5474	0.137079	0.370241	3.52949	5.27092	4.38185	1.2029	1.2415
TRAPPC2	ENSGALT00000055669.1	6.01205	6.08891	6.17577	5.56213	4.99602	5.52509	5.31703	5.36647	5.37166	5.18379	5.56651	5.5168	5.19543	5.2978	5.75419	5.37293	5.93929	5.40018	5.95405	5.4946	6.07322	5.95871	5.83391	6.42311	6.15107	5.48001	30.9117	0.137136	0.370319	4.99602	6.42311	5.65426	1.13598	1.13175
GAPDH	ENSGALT00000023323.5	12.4777	12.2287	12.1289	10.6064	10.2828	10.9084	11.1288	10.8377	10.7079	10.982	11.7859	11.6724	11.8338	11.7181	11.7112	11.3827	11.0553	12.3827	12.6878	12.2508	9.6384	11.1826	11.2853	12.7582	12.382	11.9442	795.981	0.616001	0.784857	9.6384	12.7582	11.5369	1.10585	1.19698
ACTB	ENSGALT00000015673.5	14.8785	14.7455	14.8348	12.418	11.9536	12.3604	12.5984	13.1258	13.1594	12.9612	12.0218	12.8043	11.8946	11.9909	12.1978	10.9225	11.9575	11.0419	10.8452	12.6753	11.6573	11.2431	11.8398	10.1897	9.8926	13.9623	950.534	1.69377	1.30145	9.8926	14.8785	12.3143	NA	NA

## Sheet: For FigureS1
CAGE-genes associations	Unique robust CAGE peaks annotated	Feature totals	Unique features annotated
CAGE peaks	19172	31816	19172
EST	15229	575624	8983
Ensembl	16458	31988	9300
RefSeq	8848	7155	4518
ALDB	376	8185	256
lincRNA_liv_adip	445	2314	253
NONCODE	643	21387	427

## Sheet: For FigureS5B
	PRRX1	VEGFD	LHX9	HOXA11	CRAPB1	HOXD10
Wing bud	240.766	244.917	49.814	14.529	794.941	110.005
Leg bud	259.747	265.265	168.973	85.506	311.361	40.477
