# Supplementary material for: Systematic analysis of transcription start sites in avian development
Source: PLoS Biol. 2017 Sep 5;15(9):e2002887. doi: 10.1371/journal.pbio.2002887 (PMC5600399; doi:10.1371/journal.pbio.2002887)
Supplement: S2 Table — About half of the genes (6274/12248) associated with mapped TSSs (>3TPM) have single TSS peak, and the other half of the genes have two or more TSS peaks. When taking into consideration of co-regulated multiple peaks (i.e., TSSs with similar expression profile across samples), about two thirds (8283/12248) are associated with a single expression cluster and the rest with one or more expression clusters. (XLSX) [file pbio.2002887.s014.xlsx]

## Sheet: Sheet1
gene	number of DPIs	number of expression clusters based on WGCNA co-expression analysis
5_8S_rRNA	1	1
AACS	1	1
AADAT	1	1
AAGAB	1	1
AAMDC	1	1
AARSD1	1	1
AATF	1	1
ABCC2	1	1
ABCC6	1	1
ABCD2	1	1
ABCD4	1	1
ABCG1	1	1
ABCG5	1	1
ABCG8	1	1
ABHD11	1	1
ABHD12	1	1
ABHD12B	1	1
ABHD17C	1	1
ABHD18	1	1
ABLIM1	1	1
ABLIM2	1	1
ACAA2	1	1
ACAD8	1	1
ACADS	1	1
ACAN	1	1
ACBD3	1	1
ACBD5	1	1
ACBD6	1	1
ACE2	1	1
ACKR2	1	1
ACKR4	1	1
ACO1	1	1
ACOX1	1	1
ACOX2	1	1
ACOX3	1	1
ACSF3	1	1
ACSL1	1	1
ACSS1	1	1
ACSS2	1	1
ACTN2	1	1
ACTR10	1	1
ACTR5	1	1
ACVR2A	1	1
ACYP1	1	1
ADAL	1	1
ADAM17	1	1
ADAM19	1	1
ADAM23	1	1
ADAMDEC1	1	1
ADAMTS1	1	1
ADAMTS14	1	1
ADAMTS15	1	1
ADAMTS17	1	1
ADAMTS20	1	1
ADAMTS3	1	1
ADAMTSL2	1	1
ADCK1	1	1
ADCK2	1	1
ADCK3	1	1
ADCY2	1	1
ADCY5	1	1
ADD1	1	1
ADGRB1	1	1
ADHFE1	1	1
ADI1	1	1
ADMP	1	1
ADNP	1	1
ADPRHL1	1	1
ADPRHL2	1	1
ADPRM	1	1
ADRA2A	1	1
AFAP1L1	1	1
AGA	1	1
AGAP1	1	1
AGGF1	1	1
AGK	1	1
AGO1	1	1
AGPAT2	1	1
AGPAT4	1	1
AGPS	1	1
AGRP	1	1
AGTRAP	1	1
AGXT2	1	1
AHCYL1	1	1
AHR1B	1	1
AHR2	1	1
AIDA	1	1
AIG1	1	1
AIP	1	1
AK6	1	1
AK7	1	1
AKAP6	1	1
AKR1A1	1	1
AKR1B10	1	1
AKR1B1L	1	1
AKT3	1	1
ALDBGALT0000000023	1	1
ALDBGALT0000000144	1	1
ALDBGALT0000000170	1	1
ALDBGALT0000000178	1	1
ALDBGALT0000000260	1	1
ALDBGALT0000000338	1	1
ALDBGALT0000000346	1	1
ALDBGALT0000000453	1	1
ALDBGALT0000000455	1	1
ALDBGALT0000000600	1	1
ALDBGALT0000000764	1	1
ALDBGALT0000000765	1	1
ALDBGALT0000000822	1	1
ALDBGALT0000000925	1	1
ALDBGALT0000001255	1	1
ALDBGALT0000001280	1	1
ALDBGALT0000001319	1	1
ALDBGALT0000001350	1	1
ALDBGALT0000001395	1	1
ALDBGALT0000001435	1	1
ALDBGALT0000001453	1	1
ALDBGALT0000001564	1	1
ALDBGALT0000001566	1	1
ALDBGALT0000001606	1	1
ALDBGALT0000001664	1	1
ALDBGALT0000001694	1	1
ALDBGALT0000001741	1	1
ALDBGALT0000001747	1	1
ALDBGALT0000001826	1	1
ALDBGALT0000001846	1	1
ALDBGALT0000001847	1	1
ALDBGALT0000001856	1	1
ALDBGALT0000002020	1	1
ALDBGALT0000002024	1	1
ALDBGALT0000002028	1	1
ALDBGALT0000002035	1	1
ALDBGALT0000002059	1	1
ALDBGALT0000002127	1	1
ALDBGALT0000002130	1	1
ALDBGALT0000002259	1	1
ALDBGALT0000002351	1	1
ALDBGALT0000002398	1	1
ALDBGALT0000002468	1	1
ALDBGALT0000002626	1	1
ALDBGALT0000002640	1	1
ALDBGALT0000002647	1	1
ALDBGALT0000002668	1	1
ALDBGALT0000002710	1	1
ALDBGALT0000002805	1	1
ALDBGALT0000002933	1	1
ALDBGALT0000002934	1	1
ALDBGALT0000003015	1	1
ALDBGALT0000003036	1	1
ALDBGALT0000003128	1	1
ALDBGALT0000003172	1	1
ALDBGALT0000003210	1	1
ALDBGALT0000003242	1	1
ALDBGALT0000003243	1	1
ALDBGALT0000003398	1	1
ALDBGALT0000003746	1	1
ALDBGALT0000003749	1	1
ALDBGALT0000003755	1	1
ALDBGALT0000003805	1	1
ALDBGALT0000003844	1	1
ALDBGALT0000003864	1	1
ALDBGALT0000003924	1	1
ALDBGALT0000004029	1	1
ALDBGALT0000004099	1	1
ALDBGALT0000004159	1	1
ALDBGALT0000004165	1	1
ALDBGALT0000004215	1	1
ALDBGALT0000004230	1	1
ALDBGALT0000004378	1	1
ALDBGALT0000004438	1	1
ALDBGALT0000004483	1	1
ALDBGALT0000004484	1	1
ALDBGALT0000004574	1	1
ALDBGALT0000004575	1	1
ALDBGALT0000004589	1	1
ALDBGALT0000004650	1	1
ALDBGALT0000004738	1	1
ALDBGALT0000004752	1	1
ALDBGALT0000004796	1	1
ALDBGALT0000004815	1	1
ALDBGALT0000004978	1	1
ALDBGALT0000005003	1	1
ALDBGALT0000005307	1	1
ALDBGALT0000005437	1	1
ALDBGALT0000005476	1	1
ALDBGALT0000005535	1	1
ALDBGALT0000005579	1	1
ALDBGALT0000005605	1	1
ALDBGALT0000005735	1	1
ALDBGALT0000005777	1	1
ALDBGALT0000005816	1	1
ALDBGALT0000005989	1	1
ALDBGALT0000005992	1	1
ALDBGALT0000006068	1	1
ALDBGALT0000006193	1	1
ALDBGALT0000006263	1	1
ALDBGALT0000006363	1	1
ALDBGALT0000006368	1	1
ALDBGALT0000006515	1	1
ALDBGALT0000006532	1	1
ALDBGALT0000006567	1	1
ALDBGALT0000006604	1	1
ALDBGALT0000006782	1	1
ALDBGALT0000006793	1	1
ALDBGALT0000006853	1	1
ALDBGALT0000006854	1	1
ALDBGALT0000006855	1	1
ALDBGALT0000006907	1	1
ALDBGALT0000006973	1	1
ALDBGALT0000007100	1	1
ALDBGALT0000007108	1	1
ALDBGALT0000007230	1	1
ALDBGALT0000007304	1	1
ALDBGALT0000007371	1	1
ALDBGALT0000007495	1	1
ALDBGALT0000007502	1	1
ALDBGALT0000007583	1	1
ALDBGALT0000007689	1	1
ALDBGALT0000007693	1	1
ALDBGALT0000007700	1	1
ALDBGALT0000007717	1	1
ALDBGALT0000007730	1	1
ALDBGALT0000007755	1	1
ALDBGALT0000007822	1	1
ALDBGALT0000007904	1	1
ALDBGALT0000007905	1	1
ALDBGALT0000008029	1	1
ALDBGALT0000008050	1	1
ALDBGALT0000008061	1	1
ALDBGALT0000008304	1	1
ALDBGALT0000008316	1	1
ALDBGALT0000008392	1	1
ALDBGALT0000008414	1	1
ALDBGALT0000008503	1	1
ALDBGALT0000008638	1	1
ALDBGALT0000008640	1	1
ALDBGALT0000008717	1	1
ALDBGALT0000008761	1	1
ALDBGALT0000008768	1	1
ALDBGALT0000008780	1	1
ALDBGALT0000008791	1	1
ALDBGALT0000008817	1	1
ALDBGALT0000008828	1	1
ALDBGALT0000008855	1	1
ALDH5A1	1	1
ALDH6	1	1
ALDOB	1	1
ALG11	1	1
ALG14	1	1
ALG2	1	1
ALG5	1	1
ALG6	1	1
ALG8	1	1
ALKBH8	1	1
ALOX5AP	1	1
ALPK3	1	1
ALPL	1	1
ALS2CL	1	1
ALX1	1	1
ALX4	1	1
AMACR	1	1
AMD1	1	1
AMDHD2	1	1
AMER2	1	1
AMIGO2	1	1
AMN	1	1
AMY1A	1	1
AMY1AP	1	1
AMY2A	1	1
ANAPC13	1	1
ANAPC7	1	1
ANGEL1	1	1
ANGPT1L	1	1
ANGPTL3	1	1
ANGPTL4	1	1
ANGPTL7	1	1
ANKLE2	1	1
ANKRD1	1	1
ANKRD13A	1	1
ANKRD40	1	1
ANKRD44	1	1
ANKRD9	1	1
ANKS4B	1	1
ANO3	1	1
ANO6	1	1
ANP32E	1	1
ANTXR2	1	1
ANXA7	1	1
AOAH	1	1
AP1B1	1	1
AP2A2	1	1
AP3S2	1	1
AP4S1	1	1
AP5M1	1	1
APEH	1	1
APIP	1	1
APITD1	1	1
APLF	1	1
APOA4	1	1
APOD	1	1
APOOL	1	1
APP	1	1
APPL1	1	1
APRT	1	1
AQP11	1	1
AQP3	1	1
AR	1	1
ARCN1	1	1
AREG	1	1
ARF6	1	1
ARFGAP2	1	1
ARFGEF2	1	1
ARFIP1	1	1
ARG2	1	1
ARHGAP1	1	1
ARHGAP10	1	1
ARHGAP19	1	1
ARHGAP24	1	1
ARHGAP25	1	1
ARHGAP40	1	1
ARHGEF10L	1	1
ARHGEF28	1	1
ARHGEF3	1	1
ARHGEF39	1	1
ARHGEF4	1	1
ARHGEF7	1	1
ARID5A	1	1
ARIH2	1	1
ARL11	1	1
ARL14EP	1	1
ARL4A	1	1
ARL6	1	1
ARL6IP1	1	1
ARMC9	1	1
ARNT	1	1
ARPC2	1	1
ARPP21	1	1
ARRDC1	1	1
ARRDC2	1	1
ARSA	1	1
ARSG	1	1
ARSH	1	1
ARSI	1	1
ARSK	1	1
ART7C	1	1
ARX	1	1
AS3MT	1	1
ASCC2	1	1
ASCC3	1	1
ASCL1	1	1
ASH2L	1	1
ASL1	1	1
ASMTL	1	1
ASPR	1	1
ASRGL1	1	1
ASS1	1	1
ASTL	1	1
ASXL1	1	1
ASXL2	1	1
ATCAY	1	1
ATF4	1	1
ATF6	1	1
ATG10	1	1
ATG14	1	1
ATG16L1	1	1
ATG2B	1	1
ATG4A	1	1
ATG7	1	1
ATG9A	1	1
ATL1	1	1
ATL2	1	1
ATM	1	1
ATMIN	1	1
ATOH7	1	1
ATOX1	1	1
ATP12A	1	1
ATP1B1	1	1
ATP1B4	1	1
ATP2A3	1	1
ATP4B	1	1
ATP5H	1	1
ATP5J2	1	1
ATP5S	1	1
ATP6V0A2	1	1
ATP6V1B2	1	1
ATP6V1G1	1	1
ATP7B	1	1
ATP8A1	1	1
ATP8B1	1	1
ATPIF1	1	1
ATXN10	1	1
ATXN3	1	1
ATXN7	1	1
ATXN7L1	1	1
AUH	1	1
AURKAIP1	1	1
AvBD1	1	1
AvBD13	1	1
AvBD2	1	1
AVP	1	1
AVPI1	1	1
AXIN2	1	1
AZIN1	1	1
B3GLCT	1	1
B3GNT5	1	1
B4GALNT4	1	1
B4GALT4	1	1
B9D1	1	1
BACE1	1	1
BAG3	1	1
BAG4	1	1
BAMBI	1	1
BARHL2	1	1
BARX2B	1	1
BBIP1	1	1
BBS4	1	1
BBS5	1	1
BBS7	1	1
BBX	1	1
BCAS2	1	1
BCCIP	1	1
BCL10	1	1
BCL6	1	1
BCL7B	1	1
BCR	1	1
BCS1L	1	1
BDH1	1	1
BDH2	1	1
BEAN1	1	1
BECN1	1	1
BEND7	1	1
BET1	1	1
BET1L	1	1
BF1	1	1
BFAR	1	1
BFSP1	1	1
BG1	1	1
BG8	1	1
BICC1	1	1
BIRC6	1	1
BLB1	1	1
BLM	1	1
BLOC1S5	1	1
BLOC1S6	1	1
BMP15	1	1
BMP4	1	1
BMP5	1	1
BMPER	1	1
BMPR1B	1	1
BNIP1	1	1
BNIP3L	1	1
BOK	1	1
BOLL	1	1
BORCS7	1	1
BPGM	1	1
BPHL	1	1
BRAF	1	1
BRCA2	1	1
BRF2	1	1
BRK1	1	1
BRN3	1	1
BSDC1	1	1
BTAF1	1	1
BTBD1	1	1
BTBD17	1	1
BTBD3	1	1
BTC	1	1
BTG1	1	1
BUB1	1	1
BUB1B	1	1
BZFP1	1	1
C	1	1
C10orf2	1	1
C10orf88	1	1
C11orf49	1	1
C11orf52	1	1
C12orf4	1	1
C13H5ORF15	1	1
C14orf2	1	1
C14orf39	1	1
C15H12ORF65	1	1
C15orf61	1	1
C16ORF45	1	1
C16orf62	1	1
C17H9ORF114	1	1
C17H9ORF16	1	1
C17orf89	1	1
C18orf21	1	1
C18orf32	1	1
C18orf42	1	1
C19orf24	1	1
C1GALT1	1	1
C1GALT1C1	1	1
C1H11ORF73	1	1
C1H12ORF73	1	1
C1H21ORF33	1	1
C1H2ORF49	1	1
C1H7ORF60	1	1
C1orf123	1	1
C1QBP	1	1
C1QTNF2	1	1
C1QTNF4	1	1
C1QTNF5	1	1
C2	1	1
C26H6ORF125	1	1
C2CD3	1	1
C2CD5	1	1
C3AR1	1	1
C3H6ORF120	1	1
C3H6ORF203	1	1
C3orf38	1	1
C4BPA	1	1
C4orf33	1	1
C4orf46	1	1
C4orf48	1	1
C5H11ORF96	1	1
C5H14ORF166	1	1
C5H14ORF169	1	1
C5orf22	1	1
C6orf62	1	1
C7	1	1
C7H2ORF69	1	1
C7H2ORF76	1	1
C7orf25	1	1
C7orf73	1	1
C8B	1	1
C8G	1	1
C8ORF22	1	1
C8orf37	1	1
C8orf4	1	1
C9H21ORF2	1	1
C9H2ORF82	1	1
C9orf116	1	1
C9ORF152	1	1
C9orf72	1	1
C9orf85	1	1
CA12	1	1
CA2	1	1
CA3	1	1
CA7	1	1
CA8	1	1
CAAP1	1	1
CABIN1	1	1
CABLES2	1	1
CACFD1	1	1
CACNA1C	1	1
CACNA1S	1	1
CACNA2D2	1	1
CACNB4	1	1
CACNG3	1	1
CADPS2	1	1
CALB1	1	1
CALCA	1	1
CALML3	1	1
CALML4	1	1
CAMK2A	1	1
CAMK4	1	1
CAMKK1	1	1
CAMKK2	1	1
CAMKMT	1	1
CAMLG	1	1
CAMSAP2	1	1
CANT1	1	1
CAPN10	1	1
CAPN14	1	1
CAPN2	1	1
CAPZA1	1	1
CARHSP1	1	1
CART	1	1
CASP6	1	1
CASP7	1	1
CASP8	1	1
CASP8AP2	1	1
CASZ1	1	1
CAT	1	1
CATH3	1	1
CATHB1	1	1
CATHL2	1	1
CAV2	1	1
CBFA2T2	1	1
CBL	1	1
CBX4	1	1
CBX6	1	1
CBX8	1	1
CC2D1B	1	1
CC2D2A	1	1
CCDC12	1	1
CCDC125	1	1
CCDC134	1	1
CCDC141	1	1
CCDC167	1	1
CCDC43	1	1
CCDC61	1	1
CCDC77	1	1
CCDC85A	1	1
CCDC88C	1	1
CCDC90B	1	1
CCDC93	1	1
CCK	1	1
CCKBR	1	1
CCL1	1	1
CCL20	1	1
CCL4	1	1
CCLI5	1	1
CCND3	1	1
CCNDBP1	1	1
CCNG2	1	1
CCNJL	1	1
CCNO	1	1
CCNT2	1	1
CCP110	1	1
CCR7	1	1
CCT8	1	1
CCZ1	1	1
CD1.2	1	1
CD200	1	1
CD24	1	1
CD2AP	1	1
CD300A	1	1
CD4	1	1
CD72AG	1	1
CD74	1	1
CD80	1	1
CDA	1	1
CDC14A	1	1
CDC16	1	1
CDC23	1	1
CDC40	1	1
CDC42EP3	1	1
CDC42EP4	1	1
CDCA9	1	1
CDH22	1	1
CDH4	1	1
CDHR2	1	1
CDK10	1	1
CDK2AP2	1	1
CDK5R1	1	1
CDK5RAP1	1	1
CDK9	1	1
CDKAL1	1	1
CDKN1A	1	1
CDKN2B	1	1
CDKN3	1	1
CDO1	1	1
CDR2L	1	1
CDX1	1	1
CEBPZ	1	1
CECR1	1	1
CEL	1	1
CELA2A	1	1
CELSR1	1	1
CENPA	1	1
CENPC	1	1
CENPK	1	1
CENPM	1	1
CENPN	1	1
CENPO	1	1
CENPT	1	1
CENPU	1	1
CENPW	1	1
CEP104	1	1
CEP128	1	1
CEP162	1	1
CEP55	1	1
CEP63	1	1
CER1	1	1
CERS1	1	1
CERS6	1	1
CES1	1	1
CETN2	1	1
CETP	1	1
CFAP221	1	1
CFC1	1	1
CFD	1	1
CFLAR	1	1
CGRRF1	1	1
CH25H	1	1
CHAC1	1	1
CHAC2	1	1
CHAD	1	1
CHCHD1	1	1
CHCHD3	1	1
CHCHD7	1	1
CHD9	1	1
CHEK2	1	1
CHGA	1	1
CHID1	1	1
CHKA	1	1
CHMP1A	1	1
CHMP1B	1	1
CHMP4B	1	1
CHMP4C	1	1
CHMP7	1	1
CHODL	1	1
CHPT1	1	1
chr1.1001	1	1
chr1.1078	1	1
chr1.1103	1	1
chr1.1104	1	1
chr1.1111	1	1
chr1.1129	1	1
chr1.1205	1	1
chr1.1260	1	1
chr1.1380	1	1
chr1.1402	1	1
chr1.1411	1	1
chr1.1434	1	1
chr1.1443	1	1
chr1.145	1	1
chr1.1473	1	1
chr1.1572	1	1
chr1.1592	1	1
chr1.1615	1	1
chr1.1645	1	1
chr1.1704	1	1
chr1.1710	1	1
chr1.1746	1	1
chr1.1749	1	1
chr1.1834	1	1
chr1.1840	1	1
chr1.1917	1	1
chr1.194	1	1
chr1.2106	1	1
chr1.2145	1	1
chr1.2159	1	1
chr1.2178	1	1
chr1.22	1	1
chr1.225	1	1
chr1.2254	1	1
chr1.2280	1	1
chr1.2281	1	1
chr1.2284	1	1
chr1.2334	1	1
chr1.2336	1	1
chr1.2342	1	1
chr1.2389	1	1
chr1.2609	1	1
chr1.2618	1	1
chr1.2640	1	1
chr1.2784	1	1
chr1.2785	1	1
chr1.2816	1	1
chr1.2817	1	1
chr1.2831	1	1
chr1.2887	1	1
chr1.2910	1	1
chr1.2917	1	1
chr1.3002	1	1
chr1.3015	1	1
chr1.3033	1	1
chr1.3112	1	1
chr1.3349	1	1
chr1.3360	1	1
chr1.340	1	1
chr1.3421	1	1
chr1.3457	1	1
chr1.3496	1	1
chr1.3499	1	1
chr1.3503	1	1
chr1.3506	1	1
chr1.3519	1	1
chr1.3556	1	1
chr1.3596	1	1
chr1.3754	1	1
chr1.3769	1	1
chr1.3815	1	1
chr1.3816	1	1
chr1.3819	1	1
chr1.402	1	1
chr1.4125	1	1
chr1.4167	1	1
chr1.4201	1	1
chr1.4234	1	1
chr1.4259	1	1
chr1.4347	1	1
chr1.4363	1	1
chr1.4429	1	1
chr1.4461	1	1
chr1.4539	1	1
chr1.4561	1	1
chr1.4619	1	1
chr1.463	1	1
chr1.4648	1	1
chr1.465	1	1
chr1.4715	1	1
chr1.4735	1	1
chr1.49	1	1
chr1.4977	1	1
chr1.4988	1	1
chr1.5056	1	1
chr1.5059	1	1
chr1.5080	1	1
chr1.5099	1	1
chr1.5123	1	1
chr1.5340	1	1
chr1.5373	1	1
chr1.5457	1	1
chr1.5498	1	1
chr1.5501	1	1
chr1.593	1	1
chr1.634	1	1
chr1.671	1	1
chr1.676	1	1
chr1.739	1	1
chr1.802	1	1
chr1.842	1	1
chr1.880	1	1
chr1.988	1	1
chr1.997	1	1
chr10.10	1	1
chr10.139	1	1
chr10.14	1	1
chr10.339	1	1
chr10.402	1	1
chr10.427	1	1
chr10.596	1	1
chr10.600	1	1
chr10.644	1	1
chr10.669	1	1
chr10.677	1	1
chr10.678	1	1
chr11.121	1	1
chr11.180	1	1
chr11.352	1	1
chr11.393	1	1
chr11.516	1	1
chr11.534	1	1
chr11.572	1	1
chr11.698	1	1
chr11.701	1	1
chr11.87	1	1
chr11.93	1	1
chr12.14	1	1
chr12.15	1	1
chr12.154	1	1
chr12.179	1	1
chr12.181	1	1
chr12.182	1	1
chr12.267	1	1
chr12.281	1	1
chr12.324	1	1
chr12.338	1	1
chr12.451	1	1
chr12.46	1	1
chr12.471	1	1
chr12.480	1	1
chr12.496	1	1
chr12.515	1	1
chr12.532	1	1
chr12.590	1	1
chr12.592	1	1
chr12.613	1	1
chr12.631	1	1
chr12.9	1	1
chr13.108	1	1
chr13.144	1	1
chr13.186	1	1
chr13.227	1	1
chr13.236	1	1
chr13.266	1	1
chr13.290	1	1
chr13.330	1	1
chr13.423	1	1
chr13.523	1	1
chr13.577	1	1
chr13.594	1	1
chr13.606	1	1
chr13.652	1	1
chr13.76	1	1
chr13.78	1	1
chr13.80	1	1
chr14.101	1	1
chr14.163	1	1
chr14.212	1	1
chr14.236	1	1
chr14.244	1	1
chr14.252	1	1
chr14.488	1	1
chr14.526	1	1
chr14.587	1	1
chr14.611	1	1
chr15.103	1	1
chr15.111	1	1
chr15.121	1	1
chr15.164	1	1
chr15.255	1	1
chr15.33	1	1
chr15.35	1	1
chr15.81	1	1
chr17.131	1	1
chr17.174	1	1
chr17.201	1	1
chr17.281	1	1
chr17.341	1	1
chr17.410	1	1
chr18.123	1	1
chr18.135	1	1
chr18.147	1	1
chr18.191	1	1
chr18.20	1	1
chr18.202	1	1
chr18.227	1	1
chr18.281	1	1
chr18.284	1	1
chr18.359	1	1
chr18.370	1	1
chr18.59	1	1
chr19.124	1	1
chr19.150	1	1
chr19.186	1	1
chr19.2	1	1
chr19.209	1	1
chr19.215	1	1
chr19.218	1	1
chr19.286	1	1
chr19.288	1	1
chr19.293	1	1
chr19.301	1	1
chr19.309	1	1
chr19.356	1	1
chr19.373	1	1
chr19.380	1	1
chr19.398	1	1
chr19.402	1	1
chr19.46	1	1
chr19.53	1	1
chr2.1059	1	1
chr2.1070	1	1
chr2.1081	1	1
chr2.111	1	1
chr2.1126	1	1
chr2.1184	1	1
chr2.1237	1	1
chr2.1248	1	1
chr2.15	1	1
chr2.1539	1	1
chr2.1589	1	1
chr2.1623	1	1
chr2.1681	1	1
chr2.1737	1	1
chr2.1744	1	1
chr2.1799	1	1
chr2.1829	1	1
chr2.1864	1	1
chr2.1929	1	1
chr2.1948	1	1
chr2.1952	1	1
chr2.1986	1	1
chr2.2013	1	1
chr2.2053	1	1
chr2.212	1	1
chr2.2126	1	1
chr2.2156	1	1
chr2.2169	1	1
chr2.2198	1	1
chr2.2293	1	1
chr2.2328	1	1
chr2.2348	1	1
chr2.2358	1	1
chr2.2359	1	1
chr2.24	1	1
chr2.2663	1	1
chr2.27	1	1
chr2.271	1	1
chr2.275	1	1
chr2.2839	1	1
chr2.2844	1	1
chr2.2876	1	1
chr2.2887	1	1
chr2.2889	1	1
chr2.2931	1	1
chr2.2979	1	1
chr2.3017	1	1
chr2.3044	1	1
chr2.3047	1	1
chr2.3050	1	1
chr2.3160	1	1
chr2.3249	1	1
chr2.3286	1	1
chr2.3308	1	1
chr2.3324	1	1
chr2.3428	1	1
chr2.345	1	1
chr2.3462	1	1
chr2.3565	1	1
chr2.3581	1	1
chr2.3584	1	1
chr2.3624	1	1
chr2.3670	1	1
chr2.3720	1	1
chr2.3786	1	1
chr2.3794	1	1
chr2.3983	1	1
chr2.3990	1	1
chr2.4091	1	1
chr2.4206	1	1
chr2.449	1	1
chr2.464	1	1
chr2.507	1	1
chr2.591	1	1
chr2.599	1	1
chr2.661	1	1
chr2.717	1	1
chr2.739	1	1
chr2.745	1	1
chr2.754	1	1
chr2.852	1	1
chr2.884	1	1
chr2.885	1	1
chr2.927	1	1
chr2.947	1	1
chr2.956	1	1
chr2.965	1	1
chr2.967	1	1
chr20.13	1	1
chr20.135	1	1
chr20.144	1	1
chr20.146	1	1
chr20.179	1	1
chr20.184	1	1
chr20.198	1	1
chr20.250	1	1
chr20.271	1	1
chr20.284	1	1
chr20.301	1	1
chr20.359	1	1
chr20.379	1	1
chr20.402	1	1
chr20.409	1	1
chr20.413	1	1
chr20.43	1	1
chr20.453	1	1
chr20.454	1	1
chr20.459	1	1
chr20.80	1	1
chr21.133	1	1
chr21.207	1	1
chr21.238	1	1
chr21.25	1	1
chr21.3	1	1
chr22.121	1	1
chr22.124	1	1
chr22.16	1	1
chr22.23	1	1
chr22.52	1	1
chr23.105	1	1
chr23.180	1	1
chr23.194	1	1
chr23.216	1	1
chr23.226	1	1
chr23.232	1	1
chr23.24	1	1
chr23.53	1	1
chr23.56	1	1
chr23.57	1	1
chr24.122	1	1
chr24.172	1	1
chr24.225	1	1
chr24.228	1	1
chr25.11	1	1
chr25.16	1	1
chr25.160	1	1
chr25.165	1	1
chr25.179	1	1
chr25.201	1	1
chr25.23	1	1
chr25.31	1	1
chr25.32	1	1
chr25.35	1	1
chr25.64	1	1
chr25.7	1	1
chr25.76	1	1
chr25.87	1	1
chr26.11	1	1
chr26.116	1	1
chr26.136	1	1
chr26.151	1	1
chr26.208	1	1
chr26.248	1	1
chr26.25	1	1
chr26.28	1	1
chr26.53	1	1
chr26.76	1	1
chr27.172	1	1
chr27.177	1	1
chr27.179	1	1
chr27.191	1	1
chr27.205	1	1
chr27.210	1	1
chr27.23	1	1
chr27.253	1	1
chr27.95	1	1
chr28.126	1	1
chr28.131	1	1
chr28.133	1	1
chr28.185	1	1
chr28.27	1	1
chr28.324	1	1
chr28.90	1	1
chr3.10	1	1
chr3.1040	1	1
chr3.1042	1	1
chr3.1132	1	1
chr3.1145	1	1
chr3.1153	1	1
chr3.1168	1	1
chr3.1270	1	1
chr3.1342	1	1
chr3.1445	1	1
chr3.148	1	1
chr3.1511	1	1
chr3.1646	1	1
chr3.1737	1	1
chr3.1744	1	1
chr3.1799	1	1
chr3.1837	1	1
chr3.1889	1	1
chr3.190	1	1
chr3.1938	1	1
chr3.1959	1	1
chr3.1977	1	1
chr3.1988	1	1
chr3.1999	1	1
chr3.2072	1	1
chr3.2118	1	1
chr3.2154	1	1
chr3.2156	1	1
chr3.2182	1	1
chr3.2314	1	1
chr3.2378	1	1
chr3.238	1	1
chr3.2432	1	1
chr3.2476	1	1
chr3.2577	1	1
chr3.2667	1	1
chr3.2686	1	1
chr3.2713	1	1
chr3.2749	1	1
chr3.2810	1	1
chr3.2834	1	1
chr3.2904	1	1
chr3.2931	1	1
chr3.2939	1	1
chr3.2976	1	1
chr3.3056	1	1
chr3.3081	1	1
chr3.3135	1	1
chr3.3184	1	1
chr3.3199	1	1
chr3.3240	1	1
chr3.368	1	1
chr3.377	1	1
chr3.471	1	1
chr3.539	1	1
chr3.570	1	1
chr3.625	1	1
chr3.633	1	1
chr3.704	1	1
chr3.828	1	1
chr3.83	1	1
chr3.834	1	1
chr3.87	1	1
chr3.875	1	1
chr3.954	1	1
chr32.5	1	1
chr4.10	1	1
chr4.1048	1	1
chr4.1203	1	1
chr4.1248	1	1
chr4.129	1	1
chr4.1394	1	1
chr4.1461	1	1
chr4.1464	1	1
chr4.1573	1	1
chr4.1649	1	1
chr4.1716	1	1
chr4.1783	1	1
chr4.1989	1	1
chr4.209	1	1
chr4.2118	1	1
chr4.2155	1	1
chr4.22	1	1
chr4.2205	1	1
chr4.2284	1	1
chr4.2301	1	1
chr4.2391	1	1
chr4.2412	1	1
chr4.2456	1	1
chr4.2526	1	1
chr4.2537	1	1
chr4.2543	1	1
chr4.2590	1	1
chr4.3	1	1
chr4.392	1	1
chr4.424	1	1
chr4.438	1	1
chr4.541	1	1
chr4.60	1	1
chr4.611	1	1
chr4.612	1	1
chr4.623	1	1
chr4.646	1	1
chr4.75	1	1
chr4.769	1	1
chr4.779	1	1
chr4.787	1	1
chr4.799	1	1
chr4.8	1	1
chr4.814	1	1
chr4.819	1	1
chr4.837	1	1
chr4.849	1	1
chr4.885	1	1
chr4.893	1	1
chr4.978	1	1
chr4.985	1	1
chr5.1019	1	1
chr5.104	1	1
chr5.1078	1	1
chr5.1098	1	1
chr5.1112	1	1
chr5.118	1	1
chr5.1335	1	1
chr5.1342	1	1
chr5.1356	1	1
chr5.1383	1	1
chr5.1445	1	1
chr5.1487	1	1
chr5.1496	1	1
chr5.1500	1	1
chr5.1541	1	1
chr5.1553	1	1
chr5.1562	1	1
chr5.1566	1	1
chr5.160	1	1
chr5.1614	1	1
chr5.1617	1	1
chr5.1680	1	1
chr5.1727	1	1
chr5.1799	1	1
chr5.1802	1	1
chr5.1806	1	1
chr5.1899	1	1
chr5.256	1	1
chr5.27	1	1
chr5.294	1	1
chr5.352	1	1
chr5.355	1	1
chr5.396	1	1
chr5.435	1	1
chr5.512	1	1
chr5.535	1	1
chr5.546	1	1
chr5.594	1	1
chr5.663	1	1
chr5.679	1	1
chr5.732	1	1
chr5.751	1	1
chr5.801	1	1
chr5.828	1	1
chr5.936	1	1
chr5.943	1	1
chr5.988	1	1
chr6.1034	1	1
chr6.1038	1	1
chr6.1083	1	1
chr6.1086	1	1
chr6.112	1	1
chr6.2	1	1
chr6.22	1	1
chr6.243	1	1
chr6.280	1	1
chr6.327	1	1
chr6.394	1	1
chr6.481	1	1
chr6.538	1	1
chr6.583	1	1
chr6.589	1	1
chr6.602	1	1
chr6.605	1	1
chr6.639	1	1
chr6.643	1	1
chr6.652	1	1
chr6.714	1	1
chr6.720	1	1
chr6.760	1	1
chr6.800	1	1
chr6.855	1	1
chr6.866	1	1
chr6.875	1	1
chr6.879	1	1
chr6.944	1	1
chr6.990	1	1
chr6.996	1	1
chr7.1088	1	1
chr7.1123	1	1
chr7.1133	1	1
chr7.1147	1	1
chr7.122	1	1
chr7.123	1	1
chr7.124	1	1
chr7.128	1	1
chr7.155	1	1
chr7.160	1	1
chr7.166	1	1
chr7.198	1	1
chr7.237	1	1
chr7.270	1	1
chr7.351	1	1
chr7.353	1	1
chr7.43	1	1
chr7.442	1	1
chr7.528	1	1
chr7.537	1	1
chr7.538	1	1
chr7.549	1	1
chr7.561	1	1
chr7.590	1	1
chr7.591	1	1
chr7.595	1	1
chr7.613	1	1
chr7.616	1	1
chr7.652	1	1
chr7.672	1	1
chr7.770	1	1
chr7.782	1	1
chr7.799	1	1
chr7.878	1	1
chr7.891	1	1
chr7.911	1	1
chr7.951	1	1
chr8.232	1	1
chr8.384	1	1
chr8.404	1	1
chr8.435	1	1
chr8.440	1	1
chr8.458	1	1
chr8.495	1	1
chr8.565	1	1
chr8.597	1	1
chr8.665	1	1
chr8.681	1	1
chr8.70	1	1
chr8.74	1	1
chr8.750	1	1
chr8.76	1	1
chr8.815	1	1
chr8.859	1	1
chr8.900	1	1
chr8.905	1	1
chr8.913	1	1
chr8.969	1	1
chr9.146	1	1
chr9.152	1	1
chr9.177	1	1
chr9.179	1	1
chr9.222	1	1
chr9.296	1	1
chr9.30	1	1
chr9.359	1	1
chr9.384	1	1
chr9.412	1	1
chr9.523	1	1
chr9.541	1	1
chr9.551	1	1
chr9.604	1	1
chr9.657	1	1
chr9.745	1	1
chr9.756	1	1
chr9.813	1	1
chr9.831	1	1
chr9.98	1	1
CHRAC1	1	1
CHRD	1	1
CHRDL1	1	1
CHRNA1	1	1
CHRNA4	1	1
CHRNA7	1	1
CHRNB2	1	1
CHRNB3	1	1
chrZ.1027	1	1
chrZ.1052	1	1
chrZ.1093	1	1
chrZ.1382	1	1
chrZ.146	1	1
chrZ.1480	1	1
chrZ.1749	1	1
chrZ.1759	1	1
chrZ.1813	1	1
chrZ.1815	1	1
chrZ.183	1	1
chrZ.2013	1	1
chrZ.2017	1	1
chrZ.214	1	1
chrZ.229	1	1
chrZ.31	1	1
chrZ.322	1	1
chrZ.403	1	1
chrZ.447	1	1
chrZ.602	1	1
chrZ.711	1	1
chrZ.755	1	1
chrZ.764	1	1
chrZ.767	1	1
chrZ.792	1	1
chrZ.794	1	1
chrZ.796	1	1
chrZ.811	1	1
chrZ.812	1	1
chrZ.856	1	1
chrZ.859	1	1
chrZ.882	1	1
chrZ.959	1	1
chrZ.972	1	1
chrZ.980	1	1
CHST13	1	1
CHST3	1	1
CHTF8	1	1
CHUK	1	1
CHURC1	1	1
CIDEC	1	1
CINP	1	1
CIR1	1	1
CISD1	1	1
CITED2	1	1
CITED4	1	1
CKAP2	1	1
CKB	1	1
CKMT1A	1	1
CKMT2	1	1
CL2	1	1
CLASP1	1	1
CLCA2	1	1
CLCC1	1	1
CLCN4	1	1
CLCN7	1	1
CLDN1	1	1
CLDN11	1	1
CLDN3	1	1
CLDN5	1	1
CLEC3B	1	1
CLIC3	1	1
CLIP4	1	1
CLK3	1	1
CLN6	1	1
CLN8	1	1
CLNS1A	1	1
CLP1	1	1
CLPTM1L	1	1
CLSPN	1	1
CLSTN3	1	1
CMAS	1	1
CMC2	1	1
CMTM6	1	1
CNDP2	1	1
CNKSR2	1	1
CNN2	1	1
CNOT10	1	1
CNOT2	1	1
CNOT7	1	1
CNPY3	1	1
CNTNAP5	1	1
COA3	1	1
COASY	1	1
COCH	1	1
COG1	1	1
COG2	1	1
COG3	1	1
COG4	1	1
COG5	1	1
COG6	1	1
COG7	1	1
COL10A1	1	1
COL15A1	1	1
COMMD10	1	1
COMMD5	1	1
COMMD7	1	1
COPB1	1	1
COQ2	1	1
COQ4	1	1
COQ6	1	1
COQ7	1	1
CORO2A	1	1
COX10	1	1
COX11	1	1
COX16	1	1
COX3	1	1
COX7A2L	1	1
CPA1	1	1
CPEB1	1	1
CPLX3	1	1
CPM	1	1
CPNE2	1	1
CPNE4	1	1
CPO	1	1
CPOX	1	1
CPPED1	1	1
CPS1	1	1
CPSF2	1	1
CPSF3	1	1
CPT2	1	1
CPTP	1	1
CRABP1	1	1
CRABP2	1	1
cRac1A	1	1
CRADD	1	1
CRBN	1	1
CREB3L3	1	1
CREB5	1	1
CREBL2	1	1
CREG2	1	1
CRELD1	1	1
CRHBP	1	1
CRHR1	1	1
CRHR2	1	1
CRIP1	1	1
CRIPT	1	1
CRISPLD1	1	1
CRLF3	1	1
CRNN	1	1
CRTAP	1	1
CRTC1	1	1
CRY2	1	1
CRYAA	1	1
CRYAB	1	1
CRYBA1	1	1
CRYBA2	1	1
CRYBB1	1	1
CRYBB2	1	1
CRYM	1	1
CSF1	1	1
CSF3	1	1
CSMD3	1	1
CSPG5	1	1
CSRP3	1	1
CSTF2	1	1
CTBPL	1	1
CTBS	1	1
CTCF	1	1
CTDSP1	1	1
CTHRC1	1	1
CTNNA3	1	1
CTNNAL1	1	1
CTNS	1	1
CTRB2	1	1
CTRC	1	1
CTSE	1	1
CTSO	1	1
CTTNBP2NL	1	1
CUL1	1	1
CUL2	1	1
CUL4A	1	1
CUTC	1	1
CUX1	1	1
CUZD1	1	1
CWF19L1	1	1
CWF19L2	1	1
CWH43	1	1
CX3CL1	1	1
CXCL12	1	1
CXCL14	1	1
CXCR4	1	1
CXCR7	1	1
CXorf36	1	1
CXorf56	1	1
CYB5R3	1	1
CYBRD1	1	1
CYP17A1	1	1
CYP1A1	1	1
CYP1A2	1	1
CYP24A1	1	1
CYP26A1	1	1
CYP26C1	1	1
CYP2C23a	1	1
CYP2C45	1	1
CYP2D49	1	1
CYP2J21	1	1
CYP39A1	1	1
CYP46A1	1	1
CYP4B7	1	1
CYP7A1	1	1
CYP8B1	1	1
CYTH3	1	1
CYTH4	1	1
D2HGDH	1	1
DACT1	1	1
DAD1	1	1
DAGLB	1	1
dAK	1	1
DALRD3	1	1
DAO	1	1
DAP3	1	1
DAPP1	1	1
DARS2	1	1
DAZL	1	1
DBI	1	1
DBN1	1	1
DBR1	1	1
DBT	1	1
DBX1	1	1
DCAF6	1	1
DCLRE1B	1	1
DCLRE1C	1	1
DCPS	1	1
DCT	1	1
DCTN3	1	1
DCTN6	1	1
DDA1	1	1
DDIT4	1	1
DDOST	1	1
DDT	1	1
DDX10	1	1
DDX18	1	1
DDX20	1	1
DDX3X	1	1
DDX4	1	1
DDX47	1	1
DDX49	1	1
DDX5	1	1
DDX50	1	1
DDX54	1	1
DDX55	1	1
DDX59	1	1
DEF6	1	1
DEGS1	1	1
DEGS2	1	1
DEK	1	1
DENND1A	1	1
DENND1B	1	1
DENND2A	1	1
DENND5A	1	1
DENND6A	1	1
DEPDC1B	1	1
DEPDC6	1	1
DER	1	1
DERL2	1	1
DES	1	1
DESI1	1	1
DFFA	1	1
DGAT2	1	1
DGCR6	1	1
DGKE	1	1
DGKI	1	1
DHDDS	1	1
DHODH	1	1
DHRS7	1	1
DHRS7C	1	1
DHRSX	1	1
DHTKD1	1	1
DHX29	1	1
DHX30	1	1
DHX33	1	1
DHX36	1	1
DHX40	1	1
DHX58	1	1
DIEXF	1	1
DIO1	1	1
DIRC2	1	1
DIS3	1	1
DIS3L	1	1
DJ-1	1	1
DKK2	1	1
DLGAP4	1	1
DLL4	1	1
DLX3	1	1
DLX5	1	1
DLX6	1	1
DMAP1	1	1
DMXL2	1	1
DNA2	1	1
DNAAF1	1	1
DNAH10	1	1
DNAJA1	1	1
DNAJA2	1	1
DNAJA4	1	1
DNAJB12	1	1
DNAJB2	1	1
DNAJB5	1	1
DNAJC1	1	1
DNAJC11	1	1
DNAJC12	1	1
DNAJC16	1	1
DNAJC17	1	1
DNAJC18	1	1
DNAJC24	1	1
DNAJC27	1	1
DNAJC6	1	1
DNASE1L3	1	1
DNER	1	1
DNMT3B	1	1
DNPEP	1	1
DNTTIP1	1	1
DOCK11	1	1
DOCK3	1	1
DOHH	1	1
DOLK	1	1
DOLPP1	1	1
DONSON	1	1
DOT1L	1	1
DPCD	1	1
DPEP1	1	1
DPF3	1	1
DPH1	1	1
DPH2	1	1
DPM2	1	1
DPP7	1	1
DPY19L4	1	1
DPYS	1	1
DPYSL4	1	1
DRAXIN	1	1
DRD4	1	1
DRG1	1	1
DRG2	1	1
DROSHA	1	1
DSCC1	1	1
DTD1	1	1
DTWD1	1	1
DTWD2	1	1
DTX2	1	1
DUPD1	1	1
DUS3L	1	1
DUSP1	1	1
DUSP26	1	1
DUSP27	1	1
DYNLL2	1	1
DYNLRB2	1	1
DYRK2	1	1
DYRK3	1	1
DYSF	1	1
DZANK1	1	1
DZIP1	1	1
E2F4	1	1
E2F6	1	1
E2F7	1	1
E2F8	1	1
EARS2	1	1
EBAG9	1	1
EBNA1BP2	1	1
EBP	1	1
ECD	1	1
ECHDC1	1	1
ECHDC2	1	1
ECHDC3	1	1
ECHS1	1	1
ECI1	1	1
ECI2	1	1
EDbeta	1	1
EDC3	1	1
EDC4	1	1
EDCH4	1	1
EDEM1	1	1
EDIL3	1	1
EDN2	1	1
EDNRB	1	1
EDNRB2	1	1
EEFSEC	1	1
EEPD1	1	1
EFCAB1	1	1
EFCAB14	1	1
EFHD2	1	1
EFNB1	1	1
EFNB2	1	1
EGF	1	1
EGFL7	1	1
EGR1	1	1
EGR2	1	1
EHBP1	1	1
EHF	1	1
EI24	1	1
EIF2AK2	1	1
EIF2B	1	1
EIF2B1	1	1
EIF2B2	1	1
EIF2B3	1	1
EIF2B5	1	1
EIF3E	1	1
EIF3L	1	1
EIF4E	1	1
EIF4E2	1	1
EIF4E3	1	1
EIF4H	1	1
ELF3	1	1
ELMO3	1	1
ELMOD1	1	1
ELMOD2	1	1
ELOVL1	1	1
ELOVL2	1	1
ELOVL7	1	1
ELP2	1	1
ELP3	1	1
ELP6	1	1
EMC2	1	1
EMC3	1	1
EMC6	1	1
EME1	1	1
ENOX1	1	1
ENOX2	1	1
ENPEP	1	1
ENPP1	1	1
ENSA	1	1
ENSGALT00000000097.4	1	1
ENSGALT00000000294.5	1	1
ENSGALT00000000663.4	1	1
ENSGALT00000000779.5	1	1
ENSGALT00000000815.5	1	1
ENSGALT00000000895.5	1	1
ENSGALT00000001061.5	1	1
ENSGALT00000001064.5	1	1
ENSGALT00000001149.5	1	1
ENSGALT00000001199.5	1	1
ENSGALT00000001277.5	1	1
ENSGALT00000001441.5	1	1
ENSGALT00000001533.5	1	1
ENSGALT00000001666.5	1	1
ENSGALT00000002242.5	1	1
ENSGALT00000002261.5	1	1
ENSGALT00000002335.5	1	1
ENSGALT00000002439.5	1	1
ENSGALT00000002476.5	1	1
ENSGALT00000002552.5	1	1
ENSGALT00000002607.5	1	1
ENSGALT00000002759.5	1	1
ENSGALT00000002921.5	1	1
ENSGALT00000003212.5	1	1
ENSGALT00000003266.5	1	1
ENSGALT00000003281.4	1	1
ENSGALT00000003290.4	1	1
ENSGALT00000003400.3	1	1
ENSGALT00000003414.5	1	1
ENSGALT00000003637.4	1	1
ENSGALT00000003806.4	1	1
ENSGALT00000003848.5	1	1
ENSGALT00000003893.5	1	1
ENSGALT00000003906.2	1	1
ENSGALT00000003926.6	1	1
ENSGALT00000004056.5	1	1
ENSGALT00000004243.5	1	1
ENSGALT00000004781.5	1	1
ENSGALT00000004998.5	1	1
ENSGALT00000005300.5	1	1
ENSGALT00000005397.5	1	1
ENSGALT00000005401.5	1	1
ENSGALT00000005587.6	1	1
ENSGALT00000005601.6	1	1
ENSGALT00000005655.5	1	1
ENSGALT00000005754.5	1	1
ENSGALT00000005772.5	1	1
ENSGALT00000005833.4	1	1
ENSGALT00000006047.4	1	1
ENSGALT00000006106.5	1	1
ENSGALT00000006128.4	1	1
ENSGALT00000006382.4	1	1
ENSGALT00000006540.5	1	1
ENSGALT00000006629.5	1	1
ENSGALT00000006673.5	1	1
ENSGALT00000006927.5	1	1
ENSGALT00000006938.5	1	1
ENSGALT00000007329.5	1	1
ENSGALT00000007451.5	1	1
ENSGALT00000007539.5	1	1
ENSGALT00000007756.5	1	1
ENSGALT00000007773.5	1	1
ENSGALT00000007851.5	1	1
ENSGALT00000007864.5	1	1
ENSGALT00000008025.5	1	1
ENSGALT00000008166.5	1	1
ENSGALT00000008438.5	1	1
ENSGALT00000008577.5	1	1
ENSGALT00000008580.5	1	1
ENSGALT00000008683.4	1	1
ENSGALT00000008821.5	1	1
ENSGALT00000009112.5	1	1
ENSGALT00000009226.4	1	1
ENSGALT00000009283.5	1	1
ENSGALT00000009589.5	1	1
ENSGALT00000009688.5	1	1
ENSGALT00000009801.5	1	1
ENSGALT00000009815.5	1	1
ENSGALT00000009924.5	1	1
ENSGALT00000009953.7	1	1
ENSGALT00000010070.4	1	1
ENSGALT00000010127.5	1	1
ENSGALT00000010186.4	1	1
ENSGALT00000010325.5	1	1
ENSGALT00000010421.5	1	1
ENSGALT00000010667.5	1	1
ENSGALT00000010917.5	1	1
ENSGALT00000010974.5	1	1
ENSGALT00000011024.5	1	1
ENSGALT00000011065.4	1	1
ENSGALT00000011071.5	1	1
ENSGALT00000011283.5	1	1
ENSGALT00000011413.5	1	1
ENSGALT00000011470.5	1	1
ENSGALT00000011556.5	1	1
ENSGALT00000011648.5	1	1
ENSGALT00000011770.5	1	1
ENSGALT00000011887.5	1	1
ENSGALT00000012173.5	1	1
ENSGALT00000012180.4	1	1
ENSGALT00000012191.5	1	1
ENSGALT00000012422.5	1	1
ENSGALT00000012474.5	1	1
ENSGALT00000012483.5	1	1
ENSGALT00000012493.5	1	1
ENSGALT00000012531.4	1	1
ENSGALT00000012676.5	1	1
ENSGALT00000012936.5	1	1
ENSGALT00000013061.5	1	1
ENSGALT00000013071.5	1	1
ENSGALT00000013171.5	1	1
ENSGALT00000014014.5	1	1
ENSGALT00000014074.5	1	1
ENSGALT00000014195.5	1	1
ENSGALT00000014241.5	1	1
ENSGALT00000014300.5	1	1
ENSGALT00000014387.5	1	1
ENSGALT00000014447.5	1	1
ENSGALT00000014501.5	1	1
ENSGALT00000014649.5	1	1
ENSGALT00000014723.5	1	1
ENSGALT00000014757.5	1	1
ENSGALT00000014791.5	1	1
ENSGALT00000014861.4	1	1
ENSGALT00000015084.5	1	1
ENSGALT00000015217.5	1	1
ENSGALT00000015394.5	1	1
ENSGALT00000015407.4	1	1
ENSGALT00000015448.4	1	1
ENSGALT00000015470.5	1	1
ENSGALT00000015699.5	1	1
ENSGALT00000016068.4	1	1
ENSGALT00000016187.5	1	1
ENSGALT00000016289.5	1	1
ENSGALT00000016296.6	1	1
ENSGALT00000016562.5	1	1
ENSGALT00000016610.4	1	1
ENSGALT00000016679.5	1	1
ENSGALT00000016740.4	1	1
ENSGALT00000017197.5	1	1
ENSGALT00000017328.5	1	1
ENSGALT00000017443.5	1	1
ENSGALT00000017746.5	1	1
ENSGALT00000017829.5	1	1
ENSGALT00000017864.5	1	1
ENSGALT00000017926.5	1	1
ENSGALT00000018152.5	1	1
ENSGALT00000018498.5	1	1
ENSGALT00000018993.5	1	1
ENSGALT00000019112.5	1	1
ENSGALT00000019187.3	1	1
ENSGALT00000019366.5	1	1
ENSGALT00000019692.5	1	1
ENSGALT00000019813.5	1	1
ENSGALT00000020041.6	1	1
ENSGALT00000020100.4	1	1
ENSGALT00000020216.5	1	1
ENSGALT00000020376.5	1	1
ENSGALT00000020448.5	1	1
ENSGALT00000020563.5	1	1
ENSGALT00000020822.5	1	1
ENSGALT00000020851.5	1	1
ENSGALT00000021064.5	1	1
ENSGALT00000021288.5	1	1
ENSGALT00000021334.5	1	1
ENSGALT00000021485.5	1	1
ENSGALT00000021577.5	1	1
ENSGALT00000021604.5	1	1
ENSGALT00000021778.5	1	1
ENSGALT00000021905.5	1	1
ENSGALT00000022251.5	1	1
ENSGALT00000022358.5	1	1
ENSGALT00000022479.5	1	1
ENSGALT00000022484.4	1	1
ENSGALT00000022784.5	1	1
ENSGALT00000022849.5	1	1
ENSGALT00000023517.4	1	1
ENSGALT00000023656.5	1	1
ENSGALT00000023734.5	1	1
ENSGALT00000023743.5	1	1
ENSGALT00000023844.5	1	1
ENSGALT00000023883.5	1	1
ENSGALT00000024034.5	1	1
ENSGALT00000024036.5	1	1
ENSGALT00000024127.5	1	1
ENSGALT00000024463.6	1	1
ENSGALT00000024500.5	1	1
ENSGALT00000025277.5	1	1
ENSGALT00000025405.5	1	1
ENSGALT00000025439.5	1	1
ENSGALT00000026256.5	1	1
ENSGALT00000026575.5	1	1
ENSGALT00000026593.4	1	1
ENSGALT00000026633.4	1	1
ENSGALT00000026711.5	1	1
ENSGALT00000026745.5	1	1
ENSGALT00000026880.5	1	1
ENSGALT00000027358.5	1	1
ENSGALT00000027473.5	1	1
[truncated: 10,249 more rows]
