# Supplementary material for: Systematic analysis of transcription start sites in avian development
Source: PLoS Biol. 2017 Sep 5;15(9):e2002887. doi: 10.1371/journal.pbio.2002887 (PMC5600399; doi:10.1371/journal.pbio.2002887)
Supplement: S3 Table — This Supplementary table contains 11 separate tables. Expression enrichment scores are reported for all CAGE peaks (Sup-table3-DPIs_all). Lists of enriched peaks (score > 10) for each stage or cell type are also reported (Sup-table 3-early, Sup-table 3-mid, Sup-table 3-mid-late, sup-table 3 late, Sup-table 3-wing, Sup-table 3-leg, Sup-table 3-extraemb, Sup-table 3-hepatocytes, Sup-table 3-mesen and Sup-table 3-aortic). (XLSX) [file pbio.2002887.s015.xlsx]

## Sheet: Sup-table 3-DPIs_all
id	tpm.Aortic Smooth Muscle cells; donor1	tpm.Aortic Smooth Muscle cells; donor2	tpm.Aortic Smooth Muscle cells; donor3	early.embryo_01hr30min (HH1)	early.embryo_05hr30min (HH1)	early.embryo_06hr (HH1-2)	early.embryo_14hr (HH3)	early.embryo_18hr (HH4)	early.embryo_22hr (HH5-6)	early.embryo_day01 (HH7 2-3 somites)	middle.embryo_day01.5 (HH11-12)	middle.embryo_day02 (HH14)	middle.embryo_day03 (HH19)	middle.embryo_day04 (HH23)	middle_late.embryo_day05 (HH25-27)	middle_late.embryo_day07 (HH32)	middle_late.embryo_day10 (HH37)	late.embryo_day15 (HH41)	late.embryo_day20 (HH45)	tpm.chicken embryo; extraembryonic tissue; day07 (HH32)	tpm.chicken embryo; extraembryonic tissue; day15 (HH41)	tpm.chicken leg buds; day03 (HH20)	tpm.chicken wing buds; day03 (HH20)	tpm.hepatocytes; tech_rep1	tpm.hepatocytes; tech_rep2	tpm.Mesenchymal stem cells - bone marrow derived; donor1	enrichment
chr1:100163072..100163074,-	0	0	0	0	0	0	0	0	0	0	0	0	0	0	0	0	0	0	0	0	0	0	0	0	0	0	NA
chr1:1003097..1003140,-	45.1902	33.8283	40.6269	57.2226	34.4172	43.9432	44.2418	44.1305	62.11	41.8402	47.2709	46.6638	36.3795	39.4983	30.1224	35.063	34.2646	18.7406	22.99	39.5475	5.10245	46.2252	41.5113	52.8338	36.045	58.7427	NA
chr1:100446459..100446462,-	0	0	0	1.29134	0	0.276372	0.24443	0	0	0	0	0	0	0	0	0	0	0	0	0	5.10245	0	0	0	0	0	NA
chr1:100721806..100721811,+	0.772483	0	0	0.484253	0.637355	0.276372	0.24443	0.596357	0.140045	0	0	0.31318	0.245807	0.580857	6.23222	12.3889	12.7827	13.1184	25.3359	0	0	0.718526	2.07557	0	0	0	late
chr1:100784816..100784820,+	0	0	0	0	0	0	0.24443	0	0	0.240461	0	0	0.245807	0	0.519352	0.233754	3.01813	0	0	0	0	0	0	0	0	0	NA
chr1:101008029..101008037,-	17.574	10.5897	14.4538	14.1241	4.78017	9.67304	7.33289	8.94536	21.4269	18.275	11.7443	11.2745	9.34067	13.0693	6.23222	6.5451	5.68118	0	8.4453	3.88992	15.3073	11.4964	4.15113	2.78073	3.645	11.5219	NA
chr1:101034123..101034144,-	7.53171	8.23645	3.51579	2.7441	5.09884	9.39666	7.82175	8.05083	2.87093	6.01152	11.1571	5.01088	23.5975	17.1353	1.55806	8.41513	3.55074	3.74813	1.40755	4.53824	0	5.02968	2.07557	6.95182	13.77	23.0438	NA
chr1:101034919..101034957,-	7.91795	4.41238	4.49239	5.32679	5.7362	3.0401	3.42202	3.57814	2.10068	1.92369	4.11051	4.6977	10.5697	11.6171	1.55806	6.31135	1.4203	7.49625	1.87673	2.59328	5.10245	5.86796	2.07557	4.17109	9.71999	10.1997	NA
chr1:101035029..101035063,-	13.1322	7.35397	6.25029	7.34451	5.09884	9.12029	8.31061	2.98179	3.78122	2.40461	4.99133	8.14268	21.631	15.1023	1.0387	8.41513	6.21379	3.74813	3.28428	3.2416	15.3073	7.90378	4.15113	2.78073	10.935	13.0329	NA
chr1:101035097..101035116,-	3.86241	2.94159	3.12514	1.21063	2.54942	2.76372	1.22215	0.596357	0.490158	2.16415	2.05525	0.62636	13.5194	12.7788	0.519352	2.10378	0.887685	0	0	0	0	1.79631	0	1.39036	5.265	4.5332	NA
chr1:101035141..101035156,-	8.30419	3.23575	2.34386	4.19686	3.50545	4.9747	3.17759	1.78907	1.05034	2.16415	3.8169	3.75816	7.86583	11.6171	1.0387	3.0388	2.66305	1.87406	10.322	6.4832	15.3073	1.79631	2.07557	1.39036	7.695	5.09985	NA
chr1:101035389..101035415,-	13.7116	12.0605	11.1333	8.47444	6.05488	5.52745	9.0439	5.96357	3.50113	5.29014	9.10184	8.76904	16.4691	21.7821	4.67417	4.44132	4.97103	1.87406	9.38367	9.07648	15.3073	4.1914	8.30226	13.9036	30.78	24.9326	NA
chr1:101035515..101035519,-	82.6556	68.8332	82.2304	29.0552	40.7907	45.3251	49.1304	27.7306	13.3743	12.7444	18.2037	19.7303	30.2343	47.3398	11.4257	11.6877	22.3697	11.2444	6.56857	19.4496	40.8196	19.7595	2.07557	11.1229	88.29	65.5425	NA
chr1:101036504..101036529,-	2.31745	5.0007	3.90643	12.0256	11.1537	11.3313	7.57732	3.57814	2.1707	6.97336	4.11051	3.1318	7.12841	9.00328	5.19352	3.0388	1.59783	3.74813	17.829	5.18656	40.8196	1.91607	0	2.78073	12.555	4.15543	NA
chr1:101036721..101036734,-	28.775	30.8867	27.7357	21.8721	7.96694	13.8186	8.55504	9.54172	11.8338	8.65659	12.0379	12.214	18.4355	265.161	0	93.969	7.63409	1.87406	0.938367	1.29664	5.10245	5.14943	0	1.39036	44.55	30.788	middle
chr1:101040313..101040333,-	1.73809	2.35327	2.92982	0.887798	1.27471	1.65823	1.46658	0.596357	0.420135	1.44276	2.34886	2.19226	2.21226	4.64685	0.519352	0.935015	0.355074	0	1.87673	0	0	1.91607	2.07557	1.39036	0.81	3.96655	NA
chr1:101040483..101040516,+	3.86241	0.588318	1.17193	0.161418	0.318678	0.552745	0.24443	0	0	0	0.293608	0.31318	0.491614	0.290428	1.55806	0.935015	0.532611	0	0.938367	0.64832	0	0.119754	0	0	0	1.88883	NA
chr1:101040530..101040537,+	3.86241	0.882477	0	0	0	0	0	0	0	0	0.293608	0	0.491614	0.580857	0.519352	0.233754	0	0	0	0.64832	0	0.239509	0	0	0.81	0.377767	NA
chr1:101040546..101040552,-	5.98674	7.05981	7.61754	7.02168	9.24165	14.3714	10.5105	5.06904	1.26041	5.04968	13.2124	7.20314	13.5194	15.6831	7.27092	15.8952	1.95291	26.2369	14.5447	5.18656	0	17.2446	6.2267	5.56145	15.39	11.1441	NA
chr1:101040555..101040556,-	9.26979	15.0021	12.1099	14.5276	16.2526	19.8988	8.55504	3.27997	1.89061	3.84737	9.98266	10.6481	14.7484	20.33	15.0612	14.4927	3.72828	26.2369	19.2365	5.18656	5.10245	11.4964	6.2267	18.0747	23.895	11.5219	NA
chr1:101040559..101040589,-	94.2429	77.3638	72.6596	86.1971	123.647	143.437	133.459	135.97	47.7554	253.205	248.686	169.117	523.569	756.276	181.773	278.401	46.8698	1302.47	497.804	187.365	632.703	164.063	93.4004	304.49	559.305	137.318	NA
chr1:101040734..101040747,-	3012.88	3121.91	2640.36	1394.41	891.66	1342.06	1283.74	1123.24	738.178	995.748	3211.19	2579.04	3930.21	6207.04	634.128	2049.32	1269.39	1399.92	675.155	1447.7	4229.93	1441.84	778.337	1518.28	3209.22	2471.73	NA
chr1:101040902..101040913,-	54.46	48.5362	49.6117	10.4922	24.2195	30.401	22.9764	13.418	3.43111	7.45428	29.948	25.9939	49.1614	56.924	35.8353	53.2958	16.5109	58.0959	42.6957	13.6147	40.8196	45.6264	31.1335	36.1494	106.11	58.7427	NA
chr1:101040934..101040957,+	3.47617	0.882477	0.976607	0.0807089	0.956033	1.93461	0.733289	0.298179	0	0.480922	2.34886	1.5659	7.62002	3.48514	0	3.0388	1.06522	0	0.938367	0	0	1.79631	0	2.78073	2.025	1.69995	NA
chr1:101041006..101041017,-	101.581	63.8325	70.1204	10.0079	30.5931	25.4263	21.2654	12.8217	3.22104	8.41613	35.2329	23.8017	50.6363	64.7655	16.6193	51.4258	16.6885	93.7031	31.9045	20.7462	51.0245	51.3746	18.6801	23.6362	100.845	57.9872	NA
chr1:101041022..101041033,-	132.095	68.539	86.7227	13.9626	29.637	33.4411	18.0878	15.2071	3.78122	7.69475	34.9393	30.3785	74.9712	82.4817	7.79028	61.4772	20.4167	65.5922	20.6441	5.83488	35.7171	52.4524	22.8312	43.1013	98.0099	56.4761	NA
chr1:101041046..101041059,-	272.3	128.547	149.812	32.9292	114.724	124.644	94.3499	45.6213	10.9935	27.8935	120.379	78.9214	227.617	217.24	124.644	139.551	82.0221	301.724	206.91	143.927	168.381	146.34	105.854	144.598	253.53	155.829	NA
chr1:101041046..101041067,+	14.8703	5.58902	2.53918	0.484253	2.23074	2.48735	2.4443	0.596357	0.140045	0.721382	3.22969	1.25272	5.89937	4.35643	1.55806	1.16877	0.887685	0	0.938367	0	0	3.23337	0	2.78073	4.05	3.77767	NA
chr1:101041104..101041110,-	6.37298	6.17734	4.10175	8.71656	4.78017	9.12029	4.64416	2.98179	1.12036	4.56876	5.28494	4.07134	10.0781	4.64685	0	5.14258	2.13044	13.1184	0.938367	0.64832	10.2049	3.35312	0	9.73254	9.315	8.49975	NA
chr1:101041397..101041443,-	114.907	83.5411	88.8713	32.9292	51.6258	58.0382	43.0196	42.0432	16.3853	28.3744	55.7855	49.7956	118.233	112.977	17.1386	88.8264	27.6958	29.985	20.1749	9.07648	45.922	70.176	20.7557	59.7856	128.385	151.673	NA
chr1:101041493..101041552,+	21.2433	5.58902	6.05497	4.84253	5.41752	8.84392	7.33289	1.49089	0.910293	1.2023	9.39545	2.50544	11.7987	11.3267	1.0387	5.84384	3.55074	16.8666	2.8151	1.29664	5.10245	5.26919	4.15113	2.78073	11.34	31.7324	NA
chr1:101041534..101041539,-	31.2855	20.8853	20.7041	6.376	14.9779	16.0296	12.9548	12.2253	3.08099	6.25198	14.6804	13.7799	20.6478	29.9141	8.82898	17.999	7.81163	11.2444	13.1371	4.53824	25.5122	19.4002	4.15113	12.5133	35.235	45.7098	NA
chr1:101041541..101041557,-	326.953	137.078	173.445	76.9963	86.6803	111.378	89.9501	76.6319	31.7902	25.4888	79.8613	56.0592	122.658	160.607	49.8578	77.1387	51.6632	95.5772	58.1788	59.6455	142.868	89.4564	49.8136	54.2242	270.54	182.272	NA
chr1:101041556..101041589,+	13.5184	5.29486	4.88304	1.29134	1.91207	4.14559	2.4443	0.298179	0.350113	0.480922	1.76165	0.93954	2.45807	5.51814	2.59676	2.57129	1.4203	1.87406	3.28428	0.64832	0	2.15558	6.2267	9.73254	4.86	2.64437	NA
chr1:101041572..101041583,-	58.7087	36.7699	36.3298	21.065	32.1864	44.496	27.865	19.978	5.11165	6.7329	24.0758	20.3567	30.4801	37.1748	3.11611	24.7779	12.6051	9.37031	5.6302	7.13152	25.5122	23.9509	6.2267	22.2458	63.585	48.543	NA
chr1:101041601..101041646,-	203.742	137.372	161.531	157.382	215.426	263.107	153.013	137.46	35.9216	54.1037	83.091	81.1136	179.193	176.58	121.528	116.176	65.6887	208.021	167.968	107.621	244.917	108.857	66.4181	123.742	276.21	219.671	NA
chr1:101041613..101041635,+	11.9735	3.52991	1.75789	1.61418	1.27471	3.0401	1.71101	0.596357	0.700226	0.721382	3.8169	2.19226	4.17872	4.93728	1.0387	1.16877	1.06522	1.87406	0.938367	0.64832	5.10245	1.43705	0	2.78073	6.075	3.21102	NA
chr1:101041647..101041662,-	70.6822	57.0668	54.8853	49.3939	56.406	67.1585	57.1965	59.0394	17.9958	43.5234	49.6197	45.0979	227.126	260.514	57.1287	66.6198	29.1161	142.429	51.6102	63.5354	102.049	54.6079	29.0579	73.6893	134.865	94.4416	NA
chr1:101041664..101041715,-	401.112	268.273	286.732	261.174	298.601	345.466	249.318	202.165	68.6921	89.211	145.042	165.672	451.056	511.735	182.292	187.704	133.153	371.064	243.037	171.805	443.913	182.266	126.609	283.634	587.25	459.931	NA
chr1:101041666..101041684,+	6.75922	1.76495	2.7345	0.645671	0.956033	1.38186	1.71101	0.596357	0.210068	0	2.34886	1.25272	2.45807	3.19471	0.519352	0.935015	1.24276	0	0.469184	0.64832	5.10245	1.3173	2.07557	1.39036	2.025	5.47761	NA
chr1:101041722..101041739,-	96.9466	87.0711	73.2456	83.2109	84.7683	102.811	59.3964	51.8831	19.7464	41.8402	46.0964	60.4438	117.25	87.1285	9.34833	50.257	28.2284	29.985	30.4969	14.263	76.5367	50.5363	24.9068	54.2242	176.58	132.218	NA
chr1:101041755..101041779,+	25.1057	2.35327	4.88304	0.887798	0.318678	0.276372	1.46658	0.298179	0.0700226	0	0.587216	0	2.21226	2.90428	1.55806	0.233754	1.06522	1.87406	0.469184	0	5.10245	0.718526	0	1.39036	2.43	1.51107	NA
chr1:101041761..101041792,-	445.143	301.807	364.275	104.599	158.383	200.094	154.48	146.108	60.9897	88.2491	99.8266	138.112	282.678	252.382	192.679	115.007	98.3555	357.946	303.093	162.728	265.327	133.167	172.272	155.721	405.405	435.187	NA
chr1:101041795..101041851,-	578.203	424.471	419.355	274.168	225.624	269.74	206.787	194.413	98.9419	166.158	225.784	224.863	492.352	722.876	95.5607	228.377	180.555	230.51	168.906	107.621	515.347	175.56	56.0403	748.015	1814.8	515.651	NA
chr1:101041943..101041946,-	13408.2	10663.6	12503.1	3448.69	4436.31	5526.62	5036.72	3111.2	1799.58	3013.45	7841.68	7824.18	10297.8	16399	5240.26	6510.04	4885.46	4016.12	6282.84	8382.13	9133.38	5734.19	4007.92	5632.36	14125.2	9437.36	NA
chr1:101041994..101042020,+	11.5872	5.88318	7.81286	3.30907	1.91207	4.14559	3.42202	1.49089	1.40045	0.961843	2.34886	2.19226	2.21226	3.19471	1.0387	3.27255	0.710148	1.87406	1.87673	0.64832	0	1.79631	4.15113	4.17109	2.835	17.5661	NA
chr1:101042222..101042225,-	16.4153	16.4729	24.6105	13.317	13.3845	34.5466	17.1101	8.64718	5.8819	16.1109	5.87216	10.9613	7.12841	11.3267	0.519352	4.20757	4.97103	1.87406	0.469184	1.29664	0	5.62845	6.2267	1.39036	13.77	20.5883	NA
chr1:101042285..101042304,-	0.386241	0.294159	0.195321	0.0807089	0.637355	0	0	0	0.210068	0.240461	0.880823	0	0.491614	0.580857	0	0	0.532611	0	0	0	0	0.359263	0	8.34218	12.555	1.88883	NA
chr1:101042595..101042626,+	25.2988	9.41309	8.98479	4.60041	5.09884	9.67304	9.53276	1.49089	1.5405	2.88553	6.16576	5.63724	8.35744	11.6171	2.59676	5.84384	3.01813	0	0.938367	1.94496	0	5.5087	8.30226	8.34218	6.075	15.2995	NA
chr1:101043785..101043801,-	165.118	151.786	129.303	87.9727	83.4936	106.127	103.149	54.8649	41.4534	56.7487	56.9599	56.0592	49.8989	65.6368	8.30963	22.9079	23.7899	1.87406	4.22265	10.3731	10.2049	40.3572	8.30226	34.7591	63.99	57.6094	NA
chr1:101070789..101070813,-	1.93121	0.882477	2.14854	0.403545	0.637355	0.276372	0.488859	2.08725	0.210068	1.2023	1.76165	3.75816	5.40776	2.90428	1.55806	3.5063	1.4203	3.74813	2.8151	0.64832	0	2.15558	0	0	1.215	3.02213	NA
chr1:101071193..101071202,-	9.07667	5.29486	7.2269	2.34056	2.8681	3.86921	3.17759	1.19271	0.980316	0.961843	2.93608	2.50544	4.67034	6.099	4.15481	2.80504	3.19566	11.2444	6.09939	3.88992	5.10245	2.8741	4.15113	6.95182	4.05	8.49975	NA
chr1:101071203..101071255,-	26.4575	15.0021	20.3134	6.05317	6.69223	7.46206	7.82175	5.6654	2.66086	3.60691	9.98266	13.4667	15.7317	18.5874	9.86768	13.0902	2.13044	24.3628	14.5447	5.83488	0	10.7779	4.15113	8.34218	10.935	21.7216	NA
chr1:101071267..101071289,-	5.02114	5.29486	5.07836	2.25985	1.59339	2.48735	1.46658	1.19271	0.770248	1.2023	0.880823	2.19226	3.93291	3.19471	4.15481	1.40252	1.06522	1.87406	2.34592	3.2416	0	1.3173	0	6.95182	5.67	9.0664	NA
chr1:101071301..101071309,-	2.12433	2.05911	2.53918	1.53347	1.59339	1.38186	0.488859	0.596357	0.630203	0.961843	0.293608	1.87908	4.42453	4.066	2.07741	0.467507	0.532611	0	0.469184	0.64832	5.10245	0.598771	0	0	2.025	5.28873	NA
chr1:101071343..101071348,-	0.965603	0.882477	1.95321	0	0	0	0.24443	0	0	0	0.293608	0	0	0	0	0	0.177537	0	0	0	0	0.119754	0	0	0	1.1333	NA
chr1:101071361..101071381,-	41.3278	57.9493	84.9649	4.76183	1.91207	4.14559	4.1553	2.68361	1.89061	6.49244	5.87216	12.214	36.8711	36.594	2.07741	9.35015	4.61596	9.37031	1.40755	1.94496	5.10245	4.55066	0	1.39036	11.745	40.2321	NA
chr1:101071527..101071592,-	10.6216	5.58902	7.03157	3.47048	4.46149	5.25108	5.13302	3.57814	1.5405	2.88553	7.92741	9.3954	14.011	15.9736	2.59676	7.71387	2.13044	1.87406	3.75347	3.2416	0	6.94575	8.30226	2.78073	9.71999	10.7663	NA
chr1:101072877..101072898,-	13.3253	10.2956	8.98479	5.08466	13.3845	17.9642	7.08846	4.1745	1.12036	4.80922	7.34019	10.3349	18.9272	23.5247	6.23222	6.77886	5.32611	14.9925	12.1988	16.8563	61.2293	4.55066	2.07557	13.9036	19.44	9.44416	NA
chr1:101074359..101074367,-	0	0.294159	0.195321	0.0807089	0.318678	1.10549	0.488859	0	0	0.240461	1.17443	0.31318	0.491614	0.580857	0.519352	0.233754	0	3.74813	0.938367	1.29664	0	0.479017	2.07557	2.78073	1.62	0.377767	NA
chr1:101074376..101074415,-	0	0.294159	0.585964	1.37205	0.637355	3.31647	0.24443	1.49089	0.140045	3.84737	1.76165	2.81862	3.93291	4.066	1.0387	1.40252	0.532611	0	1.40755	1.29664	0	0.479017	0	0	0.81	0.944416	NA
chr1:101257589..101257620,-	3.86241	3.23575	2.14854	2.09843	1.91207	0.829117	2.68873	1.49089	1.96063	1.2023	1.76165	2.50544	2.21226	2.033	2.59676	0.935015	1.95291	1.87406	2.8151	16.208	15.3073	0.718526	4.15113	5.56145	4.455	3.21102	NA
chr1:101647373..101647378,+	0	0.882477	0.585964	0.0807089	0.956033	1.38186	0.488859	0	0.0700226	0.240461	2.34886	2.19226	0.983229	2.32343	0.519352	5.84384	0.177537	0	0.469184	0	0	3.59263	0	0	1.62	0.188883	NA
chr1:101775623..101775634,-	0	0	0	8.47444	1.27471	0.552745	0.24443	0	1.12036	0	0.293608	1.25272	0.491614	1.74257	0	0	0	0	0	0	0	0	0	0	0	0	NA
chr1:101831978..101831982,-	0	0	0	0.807089	0.637355	2.21098	0.733289	0.298179	0.210068	0.240461	0	0.93954	7.37422	3.19471	0	0.467507	0	0	0.469184	2.59328	0	0	0	0	0	0	NA
chr1:10220190..10220214,+	9.07667	16.1787	14.2585	0.968507	0.637355	0.829117	0	0.596357	0.770248	0.721382	1.46804	2.81862	0.983229	2.033	2.07741	4.67507	9.40946	3.74813	16.8906	1.29664	0	1.79631	0	0	0.405	2.07772	NA
chr1:10220669..10220674,+	28.3887	29.1217	20.1181	1.37205	0	0.276372	0	0	0.28009	0.240461	0.880823	0.31318	1.22904	1.16171	2.59676	11.4539	17.0435	1.87406	11.7296	4.53824	5.10245	2.15558	0	0	0	4.5332	NA
chr1:10231278..10231284,+	0.579362	0.882477	0.585964	0.242127	0.637355	0	0	0	0.0700226	0	0	0.31318	0.491614	1.16171	0.519352	3.27255	1.24276	1.87406	0	0.64832	0	2.39509	0	0	0	0.56665	NA
chr1:102501170..102501209,-	19.5052	15.2963	17.5789	100.321	45.8896	55.5509	45.7083	62.0212	68.342	55.5464	42.2795	36.6421	26.793	29.9141	26.4869	21.2716	17.0435	9.37031	25.8051	28.5261	0	50.2968	35.2846	45.882	41.31	14.544	NA
chr1:102548041..102548050,-	0	0	0	0.807089	0.318678	1.93461	1.22215	2.98179	1.75056	4.56876	7.92741	7.20314	5.40776	2.61386	2.59676	2.33754	1.4203	0	0.938367	1.29664	0	8.62231	6.2267	1.39036	0.405	0.188883	NA
chr1:102548094..102548135,-	101.968	89.7185	112.896	45.8427	44.2962	64.3948	63.3073	66.1957	42.3637	139.467	253.677	223.924	233.517	225.082	143.86	190.509	72.6126	389.805	294.647	132.906	96.9465	126.101	134.912	305.88	179.415	86.1308	NA
chr1:102548141..102548157,+	2.12433	0.882477	1.95321	9.20082	5.41752	3.86921	4.64416	6.55993	8.40271	10.0994	2.93608	3.75816	0.983229	2.90428	2.07741	2.33754	2.84059	1.87406	3.28428	3.88992	10.2049	3.23337	4.15113	1.39036	3.24	4.91097	NA
chr1:102548161..102548189,+	3.86241	4.41238	4.68772	22.9213	11.7911	15.2005	14.4214	9.54172	16.4553	17.0727	7.6338	6.88996	6.8826	6.099	3.63546	3.74006	4.7935	3.74813	3.28428	10.3731	0	7.90378	10.3778	5.56145	4.05	7.9331	NA
chr1:102548274..102548279,-	2.12433	0.588318	1.36725	4.03545	2.8681	4.14559	2.93316	1.78907	2.1707	5.77106	3.52329	6.2636	3.19549	1.16171	0.519352	1.63628	0.710148	0	0	0	0	3.11361	2.07557	2.78073	2.43	2.2666	NA
chr1:102548306..102548330,-	86.518	75.893	90.2385	31.6379	33.7798	38.9685	39.5976	42.0432	27.869	86.085	98.065	133.102	110.859	112.396	121.009	72.9311	46.6922	176.162	184.389	130.312	35.7171	60.3562	105.854	126.523	78.57	70.4535	NA
chr1:102548405..102548424,+	8.49731	6.4715	7.2269	26.7954	10.835	14.6477	8.79947	14.9089	15.0549	35.3477	14.3868	14.4063	13.2736	16.8448	12.9838	3.97381	9.23192	9.37031	17.3598	6.4832	5.10245	7.66427	6.2267	20.8554	15.39	15.8662	NA
chr1:102548439..102548451,+	1.93121	0.882477	1.95321	9.28153	3.82413	4.69833	2.19987	3.27997	3.64117	6.01152	2.34886	1.87908	1.72065	2.32343	1.0387	0.233754	1.06522	0	0	0	0	1.19754	0	1.39036	1.62	3.3999	NA
chr1:102548455..102548464,+	0.579362	0.294159	1.56257	6.376	3.18678	1.93461	1.95544	1.78907	3.36108	5.04968	0.293608	2.19226	1.47484	0	0	0.701261	0.355074	0	0.469184	0	0	0.598771	0	2.78073	0	1.69995	NA
chr1:102548471..102548480,+	1.54497	0.294159	1.56257	7.10238	1.59339	1.10549	1.95544	1.78907	3.08099	2.64507	0.587216	0.93954	1.47484	0.871285	0	0.467507	0.532611	0	0	1.29664	0	0.718526	2.07557	1.39036	1.62	1.1333	NA
chr1:102548489..102548514,+	6.17986	4.70654	2.92982	27.9253	14.0218	14.095	10.0216	9.24354	12.1839	12.9849	6.75298	7.8295	4.17872	6.97028	3.63546	2.33754	5.32611	1.87406	2.34592	3.2416	0	5.98771	8.30226	1.39036	2.835	5.09985	NA
chr1:102809822..102809884,-	81.4969	121.782	94.3403	56.8191	33.4612	51.4053	61.3518	69.1775	112.456	100.513	116.269	153.458	199.35	161.478	186.967	200.794	235.236	223.013	215.824	316.38	188.79	71.9723	70.5692	273.902	262.44	153.751	NA
chr1:10281138..10281141,+	0	0	0	0	0	0	0	0	0	0	0	0	0	0	0	0	0	0	33.7812	0	0	0	0	0	0	0	late
chr1:102939067..102939100,-	0	0	0	27.1989	10.835	10.5022	11.2438	19.6798	32.9806	32.4622	20.8462	28.8126	13.5194	16.5544	10.387	3.27255	1.59783	1.87406	1.40755	5.18656	0	7.30501	6.2267	0	0	0.188883	NA
chr1:102939109..102939127,-	0	0	0	5.4075	0.637355	3.31647	1.46658	2.38543	7.63246	5.29014	5.28494	7.8295	0.983229	3.48514	0.519352	0.233754	0.355074	0	0	1.29664	5.10245	1.55681	2.07557	0	0	0	NA
chr1:102939207..102939230,-	0.193121	0	0	3.38977	1.27471	1.10549	2.19987	5.36722	7.49242	8.41613	5.87216	11.9008	6.14518	7.84157	4.67417	2.10378	1.59783	0	1.40755	5.83488	0	2.27533	4.15113	0	0	0.188883	NA
chr1:103034075..103034080,-	14.8703	28.2393	33.9859	2.42127	1.91207	2.21098	1.46658	1.78907	2.66086	3.84737	12.0379	28.1862	24.5807	18.8778	19.216	5.14258	18.6414	3.74813	25.8051	22.6912	15.3073	3.35312	0	0	0.405	0.377767	NA
chr1:103107602..103107616,-	23.7538	21.4736	5.469	0	0	0	0.488859	1.49089	1.5405	1.68323	7.6338	7.20314	7.86583	7.55114	2.59676	6.31135	9.94207	3.74813	1.40755	16.208	5.10245	0.359263	0	1.39036	1.215	0	NA
chr1:103107766..103107772,-	14.2909	33.24	14.8444	0.0807089	0	0	0.977719	1.19271	2.94095	5.04968	8.22102	7.51632	17.4523	16.264	4.15481	17.064	8.52177	1.87406	1.40755	1.94496	0	0.479017	0	0	2.025	0	NA
chr1:10313613..10313614,+	1.35184	0	0.390643	0.0807089	0.637355	0	0	0.298179	0	0.240461	0	0.93954	0	0	0.519352	0.701261	2.84059	0	1.87673	0	0	1.3173	0	0	0	0.56665	NA
chr1:103950360..103950384,+	4.24865	12.943	16.2117	15.3347	8.92298	11.6076	11.7326	12.2253	17.1555	22.8438	15.5612	26.6203	13.2736	9.58414	12.4644	9.81765	22.0146	7.49625	10.7912	18.153	0	8.3828	4.15113	13.9036	10.53	3.3999	NA
chr1:103950405..103950425,+	37.2723	23.8269	24.4152	6.21459	3.82413	5.25108	4.39973	6.85811	9.38303	7.69475	9.68906	5.01088	11.7987	10.7459	10.387	8.18138	2.66305	9.37031	12.1988	7.77984	0	15.3285	12.4534	0	0.405	23.6104	NA
chr1:103984027..103984077,-	23.3676	25.886	21.876	52.8643	31.8678	42.0086	34.4646	33.0978	45.5847	36.7905	27.5991	30.0653	26.3014	25.2673	33.7579	18.2328	27.3407	18.7406	26.7435	33.0643	10.2049	17.0051	24.9068	43.1013	30.375	27.9547	NA
chr1:103984078..103984087,-	3.47617	2.35327	1.17193	5.4075	3.82413	3.0401	1.95544	1.49089	3.78122	1.68323	1.17443	2.50544	1.72065	1.45214	1.0387	0.701261	3.19566	0	0	0.64832	0	1.43705	0	1.39036	3.24	2.07772	NA
chr1:103987753..103987761,+	0.772483	0.882477	0.390643	4.92324	1.59339	2.48735	1.22215	1.49089	2.94095	4.56876	2.64247	2.81862	2.70388	1.45214	1.55806	0.935015	1.06522	0	3.28428	1.94496	0	1.07779	4.15113	0	1.215	1.1333	NA
chr1:103987767..103987807,+	16.8015	15.8846	19.5321	55.8506	44.6149	56.6564	54.019	55.7594	62.3901	74.7833	46.6836	48.8561	42.033	37.4653	44.1449	28.9855	30.0037	33.7331	44.1033	53.1623	15.3073	45.5066	43.5869	36.1494	35.235	15.4884	NA
chr1:103988060..103988093,+	2.51057	2.64743	2.14854	14.7697	6.37355	6.35657	6.11074	9.8399	8.75282	8.17567	3.52329	5.32406	4.17872	3.19471	4.67417	1.40252	5.14857	1.87406	6.56857	2.59328	0	3.35312	2.07557	1.39036	1.62	1.69995	NA
chr1:103988103..103988115,+	0.193121	0	0.585964	6.77955	5.09884	4.42196	3.17759	5.06904	4.69151	4.80922	1.76165	2.19226	0.983229	0.580857	3.11611	0.233754	1.59783	0	1.40755	1.29664	0	2.27533	4.15113	2.78073	0.405	0.188883	NA
chr1:103999867..103999881,+	2.51057	0.882477	0.976607	1.37205	2.23074	2.21098	2.19987	1.78907	0.700226	1.44276	7.04659	2.19226	4.17872	0.290428	0.519352	2.80504	0	0	0.938367	4.53824	0	12.2149	0	0	2.025	0.188883	NA
chr1:104020835..104020879,-	211.853	141.785	165.047	277.235	168.899	251.223	235.141	238.543	301.727	302.74	233.125	216.094	197.137	135.34	128.28	92.5665	98.7105	46.8516	77.4153	119.291	51.0245	265.854	213.783	105.668	75.33	104.641	NA
chr1:104089766..104089816,+	57.55	62.3617	65.0421	27.6832	16.2526	16.5823	22.2431	39.956	49.3659	40.6379	52.2622	59.8174	56.7815	51.6963	94.0027	22.2066	22.7247	43.1034	47.8567	158.838	86.7416	16.7656	14.529	68.1278	49.815	207.96	NA
chr1:104089863..104089879,+	0.579362	0	0.390643	0.807089	0.637355	0.552745	0	0	0.140045	0.480922	0.293608	0.93954	0	0	0	0.233754	0.177537	0	0	0	0	0	0	0	0.405	8.12198	NA
chr1:104113773..104113781,+	0	1.17664	0.781286	0	0	0	0	0	0	0	0	0	0.245807	0	0	0	0.177537	0	0.938367	0	0	0	0	4.17109	4.05	6.23315	NA
chr1:104113784..104113792,+	0.193121	0.882477	0	0	0	0	0	0	0.0700226	0	0	0.62636	0.245807	0	0	0	0	0	0	0.64832	0	0	0	0	3.24	6.42203	NA
chr1:1044185..1044216,-	17.574	11.4722	17.9696	21.3072	10.1977	13.8186	10.9993	9.24354	11.6938	7.69475	11.4507	10.6481	8.84906	12.7788	14.0225	8.18138	8.69931	7.49625	9.85285	8.42816	0	12.694	12.4534	102.887	90.72	19.455	NA
chr1:104545770..104545775,-	0	0	0	2.7441	0.956033	1.10549	1.46658	1.78907	1.40045	0.721382	0.587216	0	0	0	0	0	0	0	0	0	0	0	0	0	0	0	NA
chr1:104545791..104545809,-	0	0	0	12.3485	9.56033	8.56755	13.6881	6.55993	10.2933	4.32829	0.293608	0.31318	0	0.290428	0	0.233754	0	0	0.469184	0	0	0.119754	0	0	0	0.188883	early
chr1:104545814..104545824,-	0	0	0	4.5197	2.54942	3.0401	3.91087	2.08725	3.36108	1.2023	0	0	0.245807	0	0	0	0	0	0	0	0	0.119754	0	0	0	0	NA
chr1:104545861..104545871,-	0	0	0	1.93701	1.91207	1.93461	3.91087	4.47268	4.13133	4.08783	0.880823	0.93954	0	0.580857	0	0	0	0	0	0	0	0	0	0	0	0	NA
chr1:104545886..104545891,-	0	0	0	0.322836	0	0.276372	1.95544	0	1.47047	1.2023	0	0	0	0	0	0	0	0	0	0	0	0	0	0	0	0	NA
chr1:104576117..104576131,-	0	0	0	0.322836	0	0	0.24443	0.596357	0.910293	0.961843	0.293608	0.31318	1.22904	0.290428	1.55806	0.935015	1.24276	7.49625	0.938367	3.88992	0	0.239509	0	0	0	30.2213	Mesenchymal
chr1:104636356..104636361,-	0.193121	0	0	2.50198	2.23074	0.829117	1.95544	1.49089	1.40045	0.480922	0.587216	0.31318	0.983229	0.580857	1.0387	0.935015	1.95291	0	0.469184	1.94496	0	2.27533	4.15113	0	0	1.32218	NA
chr1:104636367..104636374,-	0.193121	0.294159	0	3.55119	1.27471	1.38186	1.71101	0.596357	0.840271	0.480922	2.05525	0.62636	0.737422	0.580857	1.0387	2.10378	3.19566	1.87406	0.938367	1.29664	0	2.99386	4.15113	0	0	0.56665	NA
chr1:104636382..104636403,-	0.772483	0.882477	1.95321	24.4548	16.8899	13.8186	18.0878	16.9962	19.6063	13.7063	11.7443	13.4667	14.5026	10.7459	14.0225	11.9214	18.1088	16.8666	7.97612	16.8563	5.10245	24.3101	20.7557	0	0.81	5.09985	NA
chr1:104652923..104652938,+	219.964	149.727	216.416	174.251	156.789	197.054	195.055	252.259	203.906	262.343	378.167	435.634	368.219	398.758	425.868	121.318	155.345	288.606	337.343	657.397	204.098	191.846	309.259	2620.83	1964.65	149.973	NA
chr1:104673939..104673940,+	0	0	0	0	0	0	0	0	0	0	0	0	0	0	0	0	0	0	0	0	0	0	0	0	0	0	NA
chr1:104704913..104704972,-	16.8015	10.5897	19.3368	99.4334	41.4281	45.3251	33.9757	26.5379	37.8822	33.4241	22.0206	25.0544	24.5807	15.3927	26.4869	13.5577	24.145	13.1184	23.9284	38.2509	10.2049	18.9212	22.8312	27.8073	21.06	21.5327	NA
chr1:104704983..104705000,-	1.35184	1.17664	1.17193	12.187	2.54942	6.90931	2.19987	3.27997	3.36108	2.40461	2.34886	2.19226	0.983229	2.32343	2.59676	1.16877	1.24276	0	2.34592	3.88992	0	1.91607	6.2267	4.17109	1.215	1.51107	NA
chr1:104732016..104732068,+	13.7116	22.0619	17.3836	12.6713	7.01091	11.3313	12.4659	14.6108	18.9761	23.0842	25.5439	23.8017	18.6813	23.2343	32.1998	23.8429	34.2646	9.37031	10.322	12.9664	0	26.4657	47.738	16.6844	12.15	19.0772	NA
chr1:104858783..104858784,+	0	0	0	3.95474	4.14281	2.48735	5.13302	3.57814	1.19038	0.480922	1.46804	2.81862	0	0.290428	0.519352	0	0	0	0	1.94496	0	0	0	0	0	0	NA
chr1:104881324..104881362,-	19.3121	9.70725	14.2585	70.5396	30.5931	49.1943	35.9312	37.5705	49.8561	43.2829	31.416	25.6808	21.8768	23.8151	24.4095	22.6741	24.6776	1.87406	8.91449	15.5597	5.10245	51.2548	29.0579	11.1229	9.315	6.98868	NA
chr1:104894265..104894276,+	0	0	0	0	0	0	0	0	0	0	0.293608	0	0	0	0	0	0	1.87406	0.469184	0	0	0	0	134.865	113.805	0	hepatocytes
chr1:104894281..104894296,+	0	0	0	0	0	0	0	0	0	0	0.293608	0	0.245807	0.580857	0	0	0	0	0	0	15.3073	0	0	340.639	242.19	0	NA
chr1:104945038..104945074,-	8.30419	7.05981	7.81286	50.4431	34.7359	36.2048	24.6874	40.8505	45.3046	28.3744	12.3315	15.3458	12.2904	11.9076	11.9451	9.11639	13.3153	13.1184	6.56857	15.5597	0	18.3224	8.30226	11.1229	13.77	8.31086	NA
chr1:105005849..105005919,-	11.7804	18.8262	16.2117	23.9705	9.56033	19.6224	10.266	9.54172	11.9038	11.0612	4.99133	10.6481	14.7484	9.87457	8.82898	6.77886	8.34424	7.49625	8.4453	8.42816	0	10.5384	6.2267	27.8073	23.085	5.47761	NA
chr1:105005970..105005991,-	3.28305	5.29486	4.29707	4.92324	1.59339	1.65823	1.71101	1.78907	1.19038	0.721382	0.587216	0.93954	1.96646	0.580857	2.59676	1.87003	3.90581	5.62219	12.668	1.94496	0	1.19754	4.15113	1.39036	3.645	2.45548	NA
chr1:105069645..105069665,-	4.82802	6.4715	7.42222	5.73033	2.23074	3.31647	1.71101	2.68361	5.60181	2.88553	4.11051	5.63724	7.62002	5.51814	7.79028	4.90883	8.52177	0	13.1371	5.83488	0	2.15558	4.15113	18.0747	7.29	5.85538	NA
chr1:105098479..105098494,-	5.6005	6.4715	8.00818	20.0965	9.56033	9.94941	9.77719	7.15629	16.3153	12.2635	9.39545	10.0218	7.12841	6.97028	9.86768	4.67507	10.4747	5.62219	5.6302	8.42816	5.10245	6.34698	4.15113	6.95182	3.645	4.15543	NA
chr1:105098523..105098534,-	2.12433	1.47079	1.95321	8.55515	5.09884	7.18568	5.86631	4.1745	5.46176	3.36645	4.99133	2.81862	3.68711	2.90428	5.19352	2.57129	4.08335	5.62219	2.8151	5.18656	5.10245	4.07165	2.07557	0	2.025	1.69995	NA
chr1:105098537..105098545,-	1.54497	1.47079	2.34386	6.53742	3.82413	5.25108	4.39973	4.47268	5.39174	4.56876	2.93608	5.32406	3.4413	0.580857	4.15481	2.80504	2.66305	0	0.938367	4.53824	0	1.79631	0	0	0.81	1.69995	NA
chr1:105150752..105150753,+	0	0	0	0	0	0	0	0	0	0	0	0	0	0	0	0	0	0	0	0	0	0	0	0	0	0	NA
chr1:105180383..105180387,+	0	0	0	0.161418	2.23074	1.10549	0.24443	0	0.770248	0.240461	1.76165	1.25272	6.63679	7.84157	10.387	12.1552	27.6958	52.4738	77.8845	0.64832	0	0	0	0	0	0	NA
chr1:105237701..105237712,+	1.35184	0.882477	1.36725	2.09843	1.59339	0.829117	2.4443	4.77086	3.36108	5.29014	4.11051	4.07134	3.93291	2.32343	4.15481	2.33754	4.08335	5.62219	4.69184	7.13152	5.10245	2.15558	2.07557	8.34218	4.05	3.77767	NA
chr1:105237779..105237803,+	6.17986	7.05981	8.39882	1.85631	0.318678	2.76372	3.42202	6.26175	6.79219	5.77106	3.52329	4.07134	5.89937	4.066	4.15481	4.44132	3.3732	1.87406	2.8151	8.42816	0	3.59263	0	4.17109	6.885	7.9331	NA
chr1:105237807..105237835,+	8.88355	10.5897	11.9146	2.90552	2.8681	2.76372	4.1553	9.8399	15.3349	15.3895	17.3229	16.5985	16.7149	15.9736	10.387	17.2978	6.7464	7.49625	9.38367	20.0979	0	8.02354	4.15113	20.8554	25.515	22.666	NA
chr1:105249245..105249249,+	4.24865	4.70654	4.10175	0.72638	1.91207	2.76372	1.46658	1.49089	1.75056	2.16415	6.45937	2.50544	3.68711	4.066	5.19352	7.48012	4.97103	0	0.938367	5.83488	0	2.27533	0	8.34218	8.1	5.85538	NA
chr1:105251503..105251532,+	1.54497	0.882477	1.56257	0.968507	0.637355	1.93461	5.86631	8.05083	7.77251	9.13751	7.92741	9.08222	9.83229	9.87457	8.82898	1.63628	3.3732	3.74813	10.322	21.3946	10.2049	1.67656	6.2267	15.294	11.745	1.1333	NA
chr1:105251610..105251642,+	11.7804	7.94229	10.5474	0.645671	2.23074	0	2.19987	2.38543	3.22104	3.12599	1.46804	2.19226	3.19549	1.45214	2.07741	1.40252	3.19566	0	1.87673	1.29664	0	0.359263	0	9.73254	8.505	24.9326	NA
chr1:105271214..105271234,+	1.93121	2.05911	1.95321	16.626	2.8681	6.63294	5.37745	4.77086	6.79219	6.49244	3.8169	5.01088	5.40776	5.51814	6.75157	4.90883	1.59783	1.87406	7.03775	14.9114	5.10245	3.47287	6.2267	8.34218	6.885	9.63305	NA
chr1:105271240..105271275,+	20.4708	16.7671	24.6105	47.5376	17.5273	22.6625	16.1324	15.8035	20.9368	12.7444	15.2676	14.0931	16.2233	16.5544	28.045	11.9214	22.9023	5.62219	31.9045	44.0858	0	12.2149	12.4534	83.4218	62.37	97.8415	NA
chr1:105297601..105297604,-	0	0	0	0	0	0	0	0	0	0	0	0	0	0	0	0	0	0	0	0	0	0	0	0	0	3.3999	NA
chr1:105302509..105302522,+	2.31745	5.0007	9.76607	0.564962	0.318678	0.552745	0.488859	0.894536	0.840271	0.480922	0.293608	0.93954	0.491614	0.290428	0.519352	0.701261	0.532611	0	1.40755	0	5.10245	0.718526	0	0	0	12.4663	NA
chr1:105302651..105302751,+	93.6635	170.906	198.447	49.9588	19.758	25.979	27.865	28.9233	40.403	31.5004	9.10184	13.1536	12.5362	9.58414	14.0225	8.64889	18.6414	7.49625	19.2365	13.6147	40.8196	5.26919	2.07557	55.6145	50.22	216.271	NA
chr1:105323500..105323509,-	2.51057	3.23575	4.68772	1.53347	1.59339	1.10549	1.46658	1.19271	1.26041	0.961843	1.76165	0.93954	0.737422	0.290428	1.55806	1.63628	1.59783	0	1.40755	0.64832	5.10245	1.19754	0	1.39036	2.025	4.72208	NA
chr1:105323523..105323544,-	26.2644	29.1217	36.9158	11.4607	5.09884	7.73843	5.86631	6.26175	7.91255	8.17567	9.39545	6.2636	4.42453	8.42242	10.9064	9.35015	7.45655	13.1184	14.0755	13.6147	10.2049	8.50255	2.07557	55.6145	33.615	28.7103	NA
chr1:105327361..105327386,-	1.54497	1.47079	0.781286	5.08466	1.59339	3.31647	3.42202	2.38543	5.8819	3.60691	1.46804	3.44498	3.4413	1.74257	2.59676	0.935015	2.48552	0	6.09939	4.53824	0	1.19754	0	9.73254	15.39	1.88883	NA
chr1:105376483..105376518,+	8.88355	16.4729	12.8912	1.53347	20.3954	10.5022	7.57732	10.7344	1.68054	4.08783	4.40412	7.20314	3.93291	2.61386	6.23222	6.5451	14.558	14.9925	6.09939	8.42816	5.10245	5.02968	35.2846	109.839	52.65	6.61091	NA
chr1:105376531..105376564,-	51.5632	98.5433	62.6982	8.47444	48.1203	33.9938	33.9757	40.5523	7.35237	17.7941	10.5699	11.2745	10.8155	11.9076	9.34833	16.5965	64.4459	31.8591	18.2982	21.3946	45.922	12.4544	22.8312	209.945	111.78	50.8096	NA
chr1:105385976..105385993,-	0	0	0	0.161418	0	0	0	0.298179	0.210068	0.480922	7.04659	5.63724	7.12841	7.26071	9.34833	2.10378	2.84059	7.49625	7.50694	9.07648	0	0.119754	0	70.9085	50.22	0	hepatocytes
chr1:105386000..105386020,-	0	0	0.195321	0.0807089	0	0	0	0	0.980316	1.68323	27.0119	25.9939	73.7422	62.1517	45.7029	18.7003	16.5109	3.74813	18.7673	53.1623	0	0	0	1052.51	1042.47	0	NA
chr1:105391391..105391400,-	0.386241	0.294159	0.195321	1.85631	2.23074	2.48735	1.22215	1.19271	1.89061	4.08783	1.46804	0.93954	1.72065	0.871285	0.519352	0.701261	0.532611	0	0	0	0	3.47287	6.2267	0	0	0.377767	NA
chr1:105391433..105391438,-	0.386241	0	0.195321	0.645671	0.318678	1.10549	0.488859	0.298179	1.82059	0.961843	0.587216	0.31318	0.245807	0.580857	0	0	0.355074	0	0	0	0	1.43705	2.07557	0	0	0.188883	NA
chr1:105391455..105391488,-	7.91795	4.11823	7.03157	41.5651	23.2635	27.6372	35.4423	28.0288	40.263	17.3132	17.3229	7.8295	11.5529	9.87457	6.75157	13.5577	14.203	13.1184	3.75347	9.07648	0	22.9928	10.3778	2.78073	3.24	7.36645	NA
chr1:105393191..105393209,+	7.14546	11.178	13.0865	23.7284	13.3845	11.884	8.79947	9.8399	8.89287	12.504	8.80823	10.6481	11.7987	12.198	19.7354	12.6227	16.5109	24.3628	22.0516	22.0429	10.2049	10.8976	6.2267	22.2458	20.25	19.2661	NA
chr1:105393253..105393264,+	5.40738	12.6488	14.8444	27.6832	13.0658	8.29117	5.62188	8.64718	9.38303	7.93521	4.40412	4.07134	5.16195	3.77557	2.59676	2.57129	5.50364	0	6.09939	3.88992	0	3.83214	0	20.8554	20.25	14.7329	NA
chr1:105393284..105393295,+	4.05553	3.52991	6.64093	11.7835	7.64827	7.73843	5.13302	4.1745	3.36108	5.29014	1.76165	2.19226	3.4413	2.033	3.11611	3.27255	4.26089	16.8666	8.91449	6.4832	0	2.99386	4.15113	6.95182	4.05	5.6665	NA
chr1:105393372..105393426,+	11.5872	11.178	13.6725	198.947	94.3286	86.7809	76.7509	79.6137	120.089	69.7336	56.9599	58.5647	45.4743	40.66	35.3159	38.8031	36.9277	11.2444	14.5447	44.7341	5.10245	87.6601	95.476	44.4916	21.06	20.0216	NA
chr1:105394128..105394129,+	0.193121	0	0.390643	0.887798	0.956033	0.552745	0	0.596357	0.28009	0.480922	0	0	0	1.16171	0.519352	0.701261	0	0	0.938367	0	0	0.359263	0	0	0.405	0.377767	NA
chr1:105394131..105394166,+	16.8015	24.7094	23.0479	82.7266	44.2962	35.652	33.9757	33.396	38.1623	33.905	21.4334	20.9831	17.6981	24.9768	31.1611	26.8817	27.5182	29.985	32.3737	48.624	25.5122	28.0225	18.6801	25.0265	14.985	28.3325	NA
chr1:105394194..105394205,+	0.772483	1.47079	1.95321	4.68112	1.91207	2.21098	1.46658	1.78907	2.38077	1.2023	2.05525	1.87908	2.21226	3.19471	2.59676	3.5063	3.55074	1.87406	1.87673	5.18656	0	3.47287	4.15113	0	0.81	1.88883	NA
chr1:105394452..105394471,+	5.21426	7.05981	8.2035	0.807089	0	0.552745	0	0.894536	1.26041	1.68323	3.52329	1.87908	2.45807	1.16171	3.11611	1.16877	1.59783	3.74813	4.22265	4.53824	0	0	0	1.39036	4.86	10.5775	NA
chr1:105395167..105395174,+	1.73809	1.47079	1.17193	0.807089	0.318678	1.10549	1.71101	1.19271	0.0700226	1.92369	1.46804	1.5659	1.96646	1.45214	1.55806	1.40252	0.355074	5.62219	3.28428	3.88992	0	2.99386	0	2.78073	0.81	1.32218	NA
chr1:105397903..105397912,+	0.772483	0.882477	1.17193	1.69489	0.637355	1.93461	0.488859	2.08725	0.700226	1.68323	1.46804	0.93954	0.983229	2.033	0	1.87003	1.06522	3.74813	1.40755	0	0	2.99386	2.07557	0	0	1.1333	NA
chr1:105399414..105399421,+	0.772483	0.294159	0.976607	0.564962	0.637355	0.276372	0.733289	0	0.0700226	0	2.34886	1.5659	0.491614	0.290428	1.55806	0.935015	0.177537	0	0.469184	1.29664	0	3.47287	2.07557	1.39036	0	0.56665	NA
chr1:105399435..105399444,+	0.193121	1.17664	0.585964	0.968507	0.318678	0.276372	0	0.894536	0.0700226	0.240461	0.293608	1.25272	0.737422	0.580857	0	1.63628	0	0	0.469184	1.29664	0	3.83214	2.07557	1.39036	0.81	0.56665	NA
chr1:105439178..105439206,-	3.86241	0.882477	1.75789	22.1142	19.4393	12.1604	8.79947	7.75265	7.98257	11.0612	5.87216	7.51632	11.7987	8.132	10.9064	5.37633	9.05438	1.87406	3.28428	14.9114	0	9.81985	16.6045	1.39036	0.81	0.944416	NA
chr1:105461067..105461117,-	3.08993	3.23575	2.92982	1.61418	2.23074	4.14559	3.66644	5.36722	8.26266	5.04968	3.22969	1.5659	2.70388	3.19471	3.63546	4.20757	2.30798	3.74813	2.34592	0.64832	0	5.14943	0	1.39036	0.405	3.58878	NA
chr1:105461242..105461253,-	1.54497	2.05911	0.390643	1.7756	1.27471	1.65823	1.22215	2.08725	3.15102	2.16415	1.17443	1.87908	2.45807	0.580857	1.0387	0.233754	0.710148	0	1.40755	0.64832	0	1.91607	2.07557	0	0	0.755533	NA
chr1:105461361..105461367,+	3.47617	3.82407	3.12514	3.55119	5.41752	7.18568	7.33289	15.2071	7.07228	8.89705	7.04659	4.07134	2.70388	4.066	7.79028	5.14258	3.55074	3.74813	7.03775	5.18656	5.10245	5.5087	2.07557	5.56145	2.835	2.64437	NA
chr1:105461387..105461396,+	7.53171	13.5313	9.37543	5.48821	1.91207	3.86921	6.11074	4.77086	10.5034	7.69475	5.28494	8.76904	7.12841	5.51814	4.15481	5.14258	12.6051	5.62219	4.22265	2.59328	0	4.90993	4.15113	12.5133	6.885	7.17756	NA
chr1:105461410..105461421,+	38.2379	42.9472	44.5333	16.8682	16.5712	21.2807	18.3322	21.767	25.9784	34.1454	16.442	15.0326	16.2233	15.9736	22.3321	29.6867	32.4893	41.2294	57.7096	18.153	5.10245	21.436	29.0579	20.8554	16.605	19.455	NA
chr1:105461853..105461855,+	0.772483	0.882477	0.976607	0.72638	0.318678	1.10549	0.733289	1.19271	0.28009	0.240461	1.17443	0.93954	0.983229	0.580857	1.0387	0.935015	2.13044	0	0.469184	0	0	1.3173	0	1.39036	0	0.56665	NA
chr1:105500278..105500281,+	0.386241	0	0.585964	0.403545	0	1.10549	2.4443	1.49089	0.350113	1.92369	0.587216	0.31318	2.70388	3.48514	2.07741	1.16877	3.3732	16.8666	5.6302	0	5.10245	2.03582	2.07557	0	0.405	0.56665	NA
chr1:105512918..105512922,+	0.193121	0.294159	0.585964	0.242127	0.637355	0.552745	0	0	0.140045	0	0.293608	0.31318	1.22904	0.580857	0	0.701261	0.177537	0	0	0	0	1.79631	0	1.39036	0.405	0	NA
chr1:105585081..105585130,-	359.011	445.357	450.607	212.103	115.043	178.26	220.72	303.546	381.483	490.3	604.538	707.787	494.072	494.309	453.394	264.375	191.917	380.435	590.702	621.091	147.971	220.827	232.463	606.198	505.44	255.937	NA
chr1:105648147..105648159,+	0.965603	0.588318	0.781286	2.7441	0.956033	1.10549	0.24443	0.596357	1.40045	0.961843	2.34886	2.81862	1.96646	3.19471	4.67417	2.57129	2.66305	3.74813	2.34592	6.4832	0	2.15558	0	0	2.43	1.1333	NA
chr1:105648422..105648457,+	12.746	12.0605	11.9146	44.2285	29.3183	32.6119	28.1094	33.0978	44.1142	47.3708	32.8841	51.0484	29.9885	30.7854	32.1998	21.7391	19.3515	7.49625	11.7296	12.9664	10.2049	31.4954	41.5113	26.4169	20.25	10.3886	NA
chr1:105648463..105648481,+	17.574	8.82477	26.9544	84.018	29.637	43.6668	22.732	26.8361	40.6831	48.8135	74.2828	102.723	29.4969	42.9834	38.432	30.6217	49.3553	18.7406	60.5247	47.9757	5.10245	27.783	39.4357	485.237	525.285	25.3104	hepatocytes
chr1:105840470..105840507,+	21.8226	24.121	31.8374	40.4352	32.5051	42.5614	46.6861	38.7632	33.4708	90.1728	79.5677	76.4159	45.7201	57.7953	91.4059	67.5548	29.8262	131.184	132.31	95.3031	10.2049	67.6612	80.947	25.0265	18.225	15.4884	NA
chr1:105845966..105845976,+	0	0	0	0	0	0	0	0	0	0	0	0	0	0	0	0.935015	2.13044	7.49625	15.0139	0	0	0	0	0	0	0	late
chr1:105918555..105918567,-	19.8914	15.5904	18.9462	0.887798	0.318678	0	0.24443	0.894536	2.24072	1.2023	3.22969	3.44498	3.4413	4.066	2.07741	3.74006	13.6703	5.62219	1.87673	0	15.3073	0	0	0	1.62	3.3999	NA
chr1:105950019..105950038,-	0.772483	0.294159	0.390643	2.09843	1.59339	2.48735	2.4443	1.78907	3.22104	6.01152	1.17443	1.87908	1.22904	0.580857	2.07741	1.16877	1.77537	0	0.938367	2.59328	0	0.718526	2.07557	0	0.405	1.32218	NA
chr1:105962065..105962082,+	0	0	0	2.66339	1.59339	2.21098	1.46658	10.1381	7.49242	6.01152	5.28494	8.45586	10.3239	7.84157	3.11611	1.16877	1.4203	1.87406	1.40755	1.94496	0	0.119754	0	0	0.405	0	NA
chr1:106016154..106016158,-	5.02114	6.17734	3.12514	0.0807089	0	0	0.24443	0.298179	0.0700226	0.240461	0	0.31318	0	0	0	0.233754	0	0	0.469184	1.29664	0	0	0	0	0	1.69995	NA
chr1:106082647..106082651,+	0	0	0	0	0	0	0	0	0	0	0	0	0	0	0	0	0	1.87406	0	0	0	0	0	0	0	0.188883	NA
chr1:106082837..106082851,-	35.3411	57.0668	30.2748	0.242127	0	0.276372	0	0.596357	0.980316	5.5306	2.05525	2.19226	1.47484	1.16171	0.519352	2.57129	6.7464	1.87406	4.69184	3.88992	5.10245	0.598771	0	0	0.405	18.6994	Aortic
chr1:106083047..106083055,+	0	0.294159	0	0	0	0	0	0	0	0	0	0	0	0	0	0	0	0	0	0	0	0	0	0	0	0.188883	NA
chr1:106161885..106161890,-	0.579362	5.58902	2.53918	0	0	0	0.24443	0	0	0	0	0.31318	0	0	0.519352	0.467507	0.177537	0	0.469184	1.29664	0	0	0	0	0	1.88883	NA
chr1:106162777..106162780,-	3.86241	5.88318	3.51579	0	0	0	0	0	0	0	0	0	0.245807	0	0	0	0	0	0	1.29664	0	0.119754	0	0	0	0.188883	NA
chr1:106164677..106164688,-	16.029	20.297	12.6959	0	0	0	0	0	0	0	0	0	0.245807	0	0	0.467507	0.177537	1.87406	0.469184	0	0	0	0	0	0.81	4.34432	Aortic
chr1:106164696..106164707,-	11.3941	15.2963	12.1099	0	0	0	0	0	0	0	0.293608	0.31318	0	0	1.0387	0.701261	0.355074	0	0.938367	0	0	0	0	0	0	4.5332	Aortic
chr1:106164721..106164732,-	29.5475	48.8304	26.3684	0.0807089	0	0	0	0	0	0	0	0	0	0.871285	0	0	0.355074	1.87406	1.40755	0.64832	0	0	0	0	0.405	8.12198	Aortic
chr1:1061914..1061974,+	388.752	437.414	404.706	310.326	181.965	235.746	252.251	259.714	318.813	302.019	385.213	342.932	384.934	329.636	332.904	359.981	325.958	93.7031	197.526	278.129	61.2293	315.792	282.277	205.774	150.255	394.199	NA
chr1:10650443..10650454,+	1.93121	3.52991	0.976607	0	0	0	0	0	0	0	0	0.31318	1.47484	0.290428	1.0387	1.87003	0.710148	0	2.34592	0.64832	0	10.2989	10.3778	0	0	0.377767	NA
chr1:10650477..10650488,+	2.70369	3.82407	3.90643	0	0	0	0	0	0	0	0.293608	0.93954	1.96646	1.45214	1.55806	1.87003	1.24276	5.62219	6.09939	0.64832	0	14.131	20.7557	0	0	0.56665	wing
chr1:10650493..10650511,+	16.2221	18.532	16.6023	0	0	0	0	0	0	0	1.46804	1.25272	4.91614	1.45214	4.15481	4.20757	2.13044	3.74813	7.97612	5.83488	0	22.7533	49.8136	0	0.405	1.69995	wing
chr1:10654664..10654677,+	0	0	0.195321	0	0	0	0	0.596357	0.0700226	4.80922	16.1484	15.3458	14.9942	8.71285	1.55806	2.10378	0.177537	0	0	1.29664	5.10245	0	0	16.6844	29.97	0	NA
chr1:106570973..106570984,+	1.93121	2.35327	3.51579	3.87403	1.91207	1.65823	1.46658	3.57814	4.13133	2.88553	4.69772	4.07134	6.8826	3.77557	4.15481	6.31135	5.14857	3.74813	6.56857	1.29664	10.2049	2.03582	0	6.95182	19.035	5.47761	NA
chr1:106570993..106571014,+	14.2909	16.4729	15.2351	19.5316	10.5164	18.2406	13.1992	15.2071	20.5866	10.8207	22.3142	31.318	39.3291	24.6864	34.2772	30.1542	34.9748	84.3328	86.799	84.2816	173.483	21.1965	8.30226	145.988	125.55	38.5322	NA
chr1:106571017..106571036,+	8.88355	3.23575	6.64093	14.2855	12.4284	19.3461	16.1324	15.2071	21.637	8.89705	17.3229	14.4063	13.7652	11.3267	18.1773	10.9864	17.9312	11.2444	19.7057	18.8013	35.7171	11.6162	10.3778	31.9784	14.58	4.34432	NA
chr1:106581209..106581235,+	3.47617	5.58902	5.66432	1.69489	0.637355	1.10549	0.488859	0.298179	0.770248	1.2023	2.05525	1.87908	2.70388	0.871285	3.63546	3.27255	4.61596	5.62219	11.7296	2.59328	0	1.67656	8.30226	1.39036	1.62	27.0103	NA
chr1:106581256..106581269,+	3.66929	7.64813	4.88304	1.04922	0.637355	0.829117	0.24443	0.596357	0.700226	0.961843	1.17443	1.5659	2.94969	1.45214	6.23222	3.0388	5.50364	7.49625	9.85285	2.59328	0	0.83828	2.07557	1.39036	1.215	8.49975	NA
chr1:106631647..106631655,+	0	0	0	0	0	0	0	0	0	0	0	1.25272	2.45807	2.90428	15.5806	1.87003	0.177537	1.87406	0.938367	7.77984	10.2049	0	0	0	0	0	middle_late
chr1:106632081..106632097,+	2.70369	4.41238	4.49239	6.61813	2.23074	6.08019	1.95544	2.08725	3.92126	3.60691	4.69772	2.19226	2.21226	2.033	3.63546	1.63628	2.30798	0	2.8151	3.2416	10.2049	2.51484	8.30226	11.1229	7.29	4.34432	NA
chr1:106632124..106632134,+	1.93121	0.882477	1.75789	5.73033	1.91207	2.76372	1.95544	1.78907	2.10068	0.961843	1.17443	0.62636	0.737422	1.16171	1.0387	0.467507	1.4203	0	0.469184	0	0	1.19754	0	2.78073	2.43	1.88883	NA
chr1:106632154..106632201,+	7.53171	5.88318	8.00818	41.4037	9.87901	12.1604	12.7103	9.24354	15.1949	7.45428	6.75298	8.76904	7.12841	6.099	6.75157	6.0776	8.52177	9.37031	4.69184	6.4832	10.2049	14.8495	6.2267	8.34218	5.265	10.3886	NA
chr1:106660119..106660136,+	1.35184	2.35327	1.75789	4.19686	1.27471	4.9747	3.17759	2.68361	4.62149	3.36645	2.93608	3.75816	2.21226	2.61386	4.67417	1.63628	3.01813	1.87406	2.34592	3.2416	0	4.07165	2.07557	1.39036	2.025	2.83325	NA
chr1:106660138..106660168,+	7.72483	5.29486	3.90643	21.3072	11.1537	15.2005	17.3545	14.0144	22.3372	19.2369	16.7356	17.2249	7.37422	9.29371	11.4257	11.9214	14.558	7.49625	4.22265	5.83488	0	22.2743	12.4534	2.78073	2.025	4.34432	NA
chr1:106697522..106697524,-	0	0	0	0	0	0	0	0	0	0	0	0	0	0	0	0	0	0	0	0	0	0	0	0	0	0	NA
chr1:106801424..106801426,+	0	0	0	0	0	0	0	0	0	0	0	0	0	0	0	0	0	0	0	0	0	0	0	0	0	0	NA
chr1:106857427..106857430,+	1.15872	0.882477	0.195321	0.0807089	0	0	0.24443	0	0	0	0	0	0	0	0.519352	8.88264	1.24276	0	1.40755	0	0	0.83828	0	0	0	0.377767	NA
chr1:106976942..106976985,-	4.82802	6.76566	6.05497	24.9391	15.9339	19.8988	17.3545	15.2071	18.486	13.7063	12.3315	11.2745	11.7987	14.5214	9.86768	7.71387	12.6051	5.62219	9.85285	9.7248	5.10245	13.173	18.6801	22.2458	15.39	20.2105	NA
chr1:107001414..107001469,-	15.8359	11.178	24.2199	21.5493	12.4284	12.4368	12.7103	10.7344	19.1162	15.8704	18.7909	11.9008	14.9942	19.7491	15.0612	14.0252	22.9023	16.8666	28.6202	15.5597	10.2049	14.3705	12.4534	54.2242	44.55	15.8662	NA
chr1:107001606..107001676,+	15.8359	16.4729	22.6573	33.4942	15.6152	16.8587	16.3768	15.5053	23.8777	16.3513	12.0379	10.3349	10.5697	9.58414	20.2547	12.3889	20.7718	18.7406	19.2365	11.6698	25.5122	14.0113	20.7557	16.6844	12.15	29.2769	NA
chr1:107019762..107019767,+	0.193121	0	0.195321	0	0	0	0	0	0	0	0	0	0	0	0	0.467507	0.710148	0	0	0	0	0	0	0	0	4.91097	NA
chr1:107073217..107073223,-	0	0	0.195321	0	0	0	0	0	0	0	0.293608	0.62636	0.245807	0	1.55806	10.5189	0.887685	0	0.938367	0	0	0	0	0	0	0	middle_late
chr1:107080211..107080265,-	24.3332	34.7108	28.5169	4.68112	2.8681	3.86921	1.71101	5.06904	8.61278	6.25198	9.39545	9.3954	11.3071	13.9406	13.5031	10.7527	14.0254	1.87406	7.50694	12.3181	10.2049	11.1371	6.2267	11.1229	10.935	19.2661	NA
chr1:107080266..107080277,-	3.28305	2.64743	5.85964	0.72638	0.318678	1.10549	0.24443	0	1.26041	0.480922	1.17443	1.5659	1.22904	0.290428	1.0387	1.63628	2.30798	3.74813	0.938367	0	0	1.19754	0	4.17109	0.405	2.45548	NA
chr1:107101175..107101191,+	0.772483	1.76495	1.36725	4.19686	0.956033	2.21098	1.46658	1.19271	3.01097	2.16415	0.587216	0.31318	0.737422	0.871285	1.0387	0.233754	2.13044	0	1.87673	2.59328	5.10245	1.79631	2.07557	5.56145	1.215	3.3999	NA
chr1:107101197..107101219,+	0.772483	1.17664	0.195321	6.61813	2.8681	2.48735	3.17759	2.08725	3.29106	1.2023	0.293608	0	0.245807	0.580857	3.11611	0.467507	4.43842	0	0.938367	0.64832	5.10245	1.67656	0	1.39036	0.405	0.944416	NA
chr1:107101227..107101234,+	0.772483	0.294159	0.195321	2.34056	0	0.276372	0.977719	0.298179	1.75056	0.961843	0.880823	0.62636	1.22904	0.871285	1.0387	0.701261	0.887685	0	2.8151	0.64832	0	0.718526	2.07557	1.39036	0.81	0.188883	NA
chr1:107101247..107101314,+	11.3941	7.35397	11.524	32.7678	11.4724	12.7131	13.6881	13.1199	27.4489	15.149	9.68906	15.0326	10.0781	11.3267	8.30963	5.37633	19.7066	0	1.87673	3.2416	0	5.5087	14.529	9.73254	6.885	10.1997	NA
chr1:107101393..107101435,+	0.579362	0.882477	1.95321	6.13388	1.59339	0.829117	1.71101	1.78907	2.45079	2.16415	1.46804	0.31318	1.96646	2.033	1.55806	1.16877	1.59783	0	1.87673	1.94496	0	1.07779	0	0	0.81	0.56665	NA
chr1:107105340..107105351,-	7.72483	8.53061	7.2269	0.161418	5.09884	1.65823	0.977719	2.08725	0.210068	0.961843	1.17443	1.25272	2.94969	2.90428	2.59676	2.57129	6.21379	3.74813	1.87673	1.29664	0	1.07779	2.07557	48.6627	17.01	5.09985	NA
chr1:107182531..107182533,+	0.386241	1.17664	1.17193	0.968507	0.956033	2.76372	1.71101	0.894536	0.910293	2.64507	1.46804	0.93954	1.22904	2.32343	0.519352	1.87003	0.532611	0	3.75347	1.94496	0	3.95189	8.30226	1.39036	0.81	1.51107	NA
chr1:1073825..1073840,+	4.24865	3.23575	3.51579	3.6319	4.14281	4.69833	4.88859	5.06904	4.76154	2.64507	2.64247	1.5659	1.47484	1.16171	3.11611	1.87003	2.84059	1.87406	0.938367	3.88992	0	3.23337	4.15113	1.39036	1.215	1.51107	NA
chr1:107384977..107384978,-	3.08993	2.05911	1.75789	1.85631	0.637355	0.829117	0.488859	0.894536	2.31075	0.721382	0.293608	0.62636	1.22904	0	0	0.233754	1.06522	0	0	0	0	2.03582	0	2.78073	0	1.32218	NA
chr1:107517387..107517401,+	0	0	0	0	0.637355	0	0.24443	0.298179	1.05034	1.92369	4.40412	4.38452	5.40776	2.90428	2.07741	1.63628	2.13044	1.87406	4.69184	6.4832	10.2049	0.119754	0	0	0	0	NA
chr1:1076204..1076206,+	0.965603	2.64743	0.976607	0.403545	1.27471	0.829117	0.733289	0.894536	0.350113	1.44276	2.34886	2.81862	3.4413	3.77557	2.07741	2.33754	0.710148	0	1.87673	3.2416	0	1.19754	4.15113	1.39036	0.405	1.32218	NA
chr1:107678515..107678518,-	3.66929	2.94159	2.7345	0	0	0	0	0	0	0.240461	0.293608	0.93954	0.245807	1.16171	0.519352	1.87003	0.532611	0	0.938367	0.64832	0	1.55681	4.15113	0	0.405	7.17756	NA
chr1:107727532..107727558,-	5.98674	2.94159	8.59415	0	0	0	0	0	0	0	0	0	0	0	0	0.233754	0.355074	0	0	0	0	0	0	0	0	3.02213	NA
chr1:107729716..107729727,-	49.0526	30.8867	51.5649	0.403545	0	0.552745	0.24443	0.298179	0.140045	0	0	0.62636	0.245807	2.033	2.07741	2.10378	1.95291	0	1.40755	1.29664	0	3.71238	6.2267	0	0	23.0438	NA
chr1:107730086..107730091,+	8.69043	5.58902	11.1333	0	0	0	0	0	0	0	0	0	0	0	0	1.16877	0	0	0	0	0	0.479017	0	0	0	1.1333	NA
chr1:107730605..107730608,-	1.35184	5.0007	2.53918	0	0	0	0	0	0	0	0	0	0	0	0	0.233754	0.532611	0	0	0	0	0	0	0	0	0	NA
chr1:107730723..107730760,-	32.2511	36.1816	44.338	0	0	0	0	0	0	0	0	0.31318	0.245807	0.871285	1.55806	4.90883	4.43842	1.87406	2.8151	0	0	0.119754	0	0	0	0.755533	Aortic
chr1:107802205..107802226,+	5.40738	3.52991	5.85964	25.504	14.6592	15.4769	10.7549	14.6108	20.5166	12.023	7.34019	10.0218	8.60325	8.42242	7.27092	6.31135	8.34424	3.74813	9.85285	15.5597	0	3.11361	4.15113	2.78073	5.67	21.7216	NA
chr1:107802306..107802336,+	6.75922	8.53061	10.938	9.44294	6.37355	6.63294	4.64416	3.57814	5.53178	3.60691	2.34886	2.19226	4.17872	3.19471	4.67417	3.5063	3.72828	0	9.85285	7.77984	10.2049	4.55066	4.15113	9.73254	2.835	13.0329	NA
chr1:107802341..107802350,+	1.35184	1.17664	1.75789	1.37205	0	0.276372	1.22215	0.894536	0.630203	1.2023	0.587216	0.62636	0.245807	0.290428	1.0387	0.935015	0.710148	1.87406	1.87673	2.59328	0	0.598771	0	0	0.405	5.09985	NA
chr1:107802354..107802367,+	2.70369	2.05911	3.71111	1.12992	0.637355	0.276372	1.46658	0.894536	1.47047	0.961843	0	0.93954	1.72065	1.74257	1.55806	2.57129	1.95291	1.87406	4.69184	4.53824	0	1.3173	2.07557	1.39036	1.215	8.49975	NA
chr1:107808790..107808811,+	0	0	0	0.161418	0	0	0	0	0	0	0	0	0	0	15.0612	0	0	58.0959	19.7057	1.29664	0	0.119754	0	1.39036	0	0	NA
chr1:107842220..107842224,+	0	0	0	0	0	0	0	0.298179	0	0.721382	20.8462	18.4776	22.6143	26.429	37.3933	0.233754	0	5.62219	1.40755	140.685	5.10245	0	0	8.34218	5.265	0	NA
chr1:107940671..107940709,-	14.2909	5.88318	5.07836	11.7835	9.56033	11.884	9.28833	12.2253	10.8535	8.65659	5.57855	4.38452	3.93291	6.38942	7.27092	2.33754	5.85872	3.74813	6.56857	4.53824	10.2049	8.74206	8.30226	8.34218	4.05	6.7998	NA
chr1:107993975..107993986,-	4.24865	3.82407	6.25029	18.0788	6.05488	8.29117	6.35517	7.45447	5.8819	6.97336	4.11051	4.07134	3.4413	4.64685	2.07741	3.27255	4.26089	1.87406	1.40755	3.2416	0	3.35312	6.2267	8.34218	3.645	5.6665	NA
chr1:107994032..107994058,+	3.28305	1.47079	1.56257	10.8957	1.27471	5.25108	6.35517	6.26175	14.3546	10.0994	8.51463	6.2636	7.12841	2.90428	4.15481	1.40252	3.3732	0	3.75347	1.94496	0	4.07165	6.2267	0	1.62	2.07772	NA
chr1:107994179..107994197,-	8.49731	11.7664	9.9614	11.0571	5.09884	11.0549	8.31061	14.6108	12.1839	15.8704	9.39545	10.0218	9.83229	7.84157	6.75157	7.01261	6.92394	5.62219	6.56857	11.6698	15.3073	6.22722	4.15113	11.1229	9.71999	11.7108	NA
chr1:108003286..108003335,-	20.0845	26.4743	28.3216	43.8249	33.1425	42.285	32.2647	28.6252	28.3591	36.0691	16.442	22.8621	23.5975	19.4587	26.4869	22.9079	21.6595	13.1184	40.819	24.6362	5.10245	28.8608	43.5869	23.6362	6.885	11.333	NA
chr1:108003371..108003400,+	1.35184	0.588318	1.56257	5.73033	6.05488	6.35657	4.64416	5.6654	6.58212	13.4658	7.34019	8.76904	6.14518	7.84157	8.30963	5.61009	3.55074	0	0.938367	4.53824	5.10245	7.78403	10.3778	0	0.81	0.755533	NA
chr1:108003670..108003720,-	45.7696	41.1823	47.4631	234.459	166.35	195.672	231.23	265.081	303.058	402.291	246.043	321.323	201.808	171.643	175.022	83.4501	68.1742	50.5997	93.3675	185.42	56.1269	190.769	228.312	147.379	124.74	57.4205	NA
chr1:108003740..108003757,-	5.98674	6.76566	7.42222	28.571	22.3074	23.2153	30.0648	31.3088	39.2126	52.9014	32.0032	44.7848	24.0891	21.4917	17.1386	10.2852	8.52177	5.62219	15.0139	22.0429	20.4098	14.8495	16.6045	31.9784	24.3	7.74421	NA
chr1:108003759..108003789,-	21.0502	14.1196	22.462	72.1538	32.1864	48.3652	43.9973	55.1631	77.9351	80.3139	44.922	74.2237	33.9214	38.627	31.1611	19.4016	25.3878	1.87406	16.4214	23.9878	0	25.0286	35.2846	40.3205	52.65	27.577	NA
chr1:108003837..108003851,-	4.44177	3.23575	5.27368	29.5395	11.7911	13.2659	10.9993	10.4363	16.5253	4.08783	2.93608	4.6977	2.21226	3.19471	2.07741	0.935015	4.26089	0	1.40755	1.94496	5.10245	2.51484	0	2.78073	7.29	5.09985	NA
chr1:108003996..108004039,+	87.6768	88.2477	99.4186	72.1538	38.2413	57.7618	59.6408	72.1593	79.2656	52.4205	40.2243	51.0484	46.9492	50.5345	62.3222	88.3589	67.9966	99.3253	93.8367	68.0736	25.5122	78.9181	60.1914	79.2507	74.52	52.6984	NA
chr1:108008818..108008819,+	0	0	0	0	0	0	0	0	0	0	0	0	0	0	9.86768	0	0	3.74813	9.85285	1.29664	0	0	0	0	0	0	NA
chr1:108027760..108027771,+	1.73809	1.76495	0.781286	0.0807089	0	0	0	1.19271	2.45079	5.04968	3.22969	2.50544	2.45807	2.033	2.59676	5.61009	3.55074	28.1109	15.4831	0.64832	0	0	0	0	0	0	NA
chr1:108027790..108027807,+	4.05553	2.35327	0.781286	0.322836	0.318678	0.276372	1.95544	14.9089	23.5276	28.8553	32.2969	26.6203	10.3239	5.51814	4.67417	17.2978	11.895	28.1109	25.3359	0	0	0	0	0	0	0.56665	NA
chr1:108061301..108061316,+	0	0	0	0	0	0	0	0	0.0700226	0	0	0	0.245807	0.290428	0	0.467507	2.84059	0	4.22265	0	0	0	0	52.8338	61.965	0	hepatocytes
chr1:108068359..108068371,+	0.193121	0	0	0.0807089	0	0	0.488859	5.36722	5.25169	5.04968	2.64247	0.93954	0.491614	1.16171	0.519352	0	0.177537	0	0.938367	0	0	0.239509	0	0	1.215	0	NA
chr1:108094492..108094523,+	0	0	0	0.564962	0	1.38186	7.08846	3.87632	7.77251	12.7444	9.98266	9.08222	5.65357	10.7459	9.34833	0.233754	0.355074	3.74813	3.28428	17.5046	25.5122	0.239509	0	68.1278	62.775	0	hepatocytes
chr1:108137465..108137472,+	0	0	0	0	0	0	0	0	0	0.240461	2.05525	0.62636	0.245807	1.16171	1.0387	0	0.177537	0	0	1.94496	0	0	0	16.6844	11.34	0	hepatocytes
chr1:108137496..108137497,+	0	0	0	0	0	0	0	0	0	0	0.293608	0.93954	0	0	0	0	0	0	0	1.29664	0	0	0	2.78073	4.86	0	NA
chr1:108137508..108137520,+	0	0	0	0	0	0	0	0	0	0.240461	3.8169	3.75816	2.70388	2.033	1.0387	0.467507	0	0	0	9.7248	5.10245	0	0	29.1976	20.655	0	NA
chr1:108137532..108137534,+	0	0	0	0	0	0	0	0	0	0.240461	0.293608	0.31318	0.491614	0.290428	0	0	0	0	0	0.64832	0	0	0	1.39036	5.67	0	NA
chr1:108143427..108143442,+	0.193121	0.294159	0	6.13388	2.8681	2.48735	4.64416	6.85811	6.44208	5.5306	16.7356	24.7412	12.782	21.4917	42.0675	38.5694	61.0727	58.0959	152.015	25.2845	15.3073	9.22108	4.15113	19.4651	8.91	1.51107	NA
chr1:108543780..108543783,-	0	0	0	0	0	0	0	0	0	0	0	0	0	0	0	0	0	0	0	0	0	0	0	0	0	0	NA
chr1:108563204..108563207,-	0	0	0	0	0	0	0	0	0	0	0	0.31318	0.491614	0	0	3.97381	1.4203	3.74813	0.938367	0	0	0.119754	0	0	0	0.188883	NA
chr1:108844619..108844648,+	27.6163	35.2991	28.3216	4.27757	1.91207	4.14559	4.39973	4.47268	10.0833	8.65659	5.87216	6.88996	10.3239	7.84157	7.27092	3.74006	12.0725	0	6.09939	3.88992	5.10245	2.27533	4.15113	16.6844	12.555	35.3212	NA
chr1:108844649..108844675,+	20.0845	33.24	25.9778	2.66339	1.27471	1.10549	2.68873	2.98179	4.48144	4.80922	5.28494	5.63724	4.67034	4.066	5.71287	3.74006	9.94207	1.87406	9.38367	6.4832	5.10245	2.75435	2.07557	8.34218	14.175	32.4879	NA
chr1:108958361..108958372,-	0	0	0	3.95474	1.27471	0.829117	0.24443	1.49089	3.22104	0.721382	2.05525	1.25272	1.47484	3.19471	0	0	0	0	0	0	0	0	0	0	1.215	0	NA
chr1:108963576..108963619,-	0	0	0	99.7562	36.3293	46.4306	42.5308	44.1305	66.5214	49.2945	54.9047	67.0205	48.424	89.1615	62.3222	1.87003	6.39133	13.1184	15.0139	53.8106	107.151	1.43705	0	83.4218	71.685	0.188883	NA
chr1:108979616..108979637,+	0	0	0	3.71261	4.14281	4.69833	9.53276	6.26175	6.86221	7.21382	8.51463	4.38452	4.67034	8.42242	5.19352	0.701261	0.177537	0	0.469184	14.263	5.10245	0	0	0	0	0	NA
chr1:108990255..108990256,+	0	0	0	0	0	0	0	0	0	0	0	0	0	0	0	0	0	0	0	0	0	0	0	4.17109	4.455	0	NA
chr1:109043563..109043580,-	0	0	0	6.86026	2.23074	3.0401	7.33289	5.96357	5.81187	6.25198	2.05525	1.87908	0.491614	4.066	4.67417	0.233754	4.08335	0	1.40755	7.13152	10.2049	0.239509	0	9.73254	4.05	0	NA
chr1:109103048..109103067,-	0.965603	0.882477	2.92982	7.18309	2.23074	4.14559	4.39973	2.38543	4.41142	1.44276	2.93608	1.5659	1.47484	3.19471	1.0387	3.5063	3.90581	0	2.34592	1.94496	0	3.35312	2.07557	2.78073	3.645	1.88883	NA
chr1:109141884..109141900,-	11.201	15.2963	12.1099	2.42127	1.27471	2.76372	1.46658	3.57814	6.09196	4.80922	2.05525	2.50544	1.47484	3.77557	2.59676	0.701261	2.84059	0	0	0.64832	0	0.479017	0	1.39036	0.405	10.7663	NA
chr1:109141902..109141929,-	16.2221	35.8874	23.8292	3.6319	1.59339	2.48735	5.37745	7.15629	12.6741	8.41613	4.11051	6.88996	5.65357	4.93728	5.71287	1.87003	5.85872	0	3.28428	4.53824	0	1.19754	0	8.34218	3.24	20.7772	NA
chr1:109168550..109168583,-	14.0978	14.1196	16.2117	28.3288	7.64827	11.6076	9.28833	9.24354	15.9651	8.41613	4.40412	6.88996	3.68711	7.55114	8.30963	9.81765	11.3624	1.87406	7.97612	4.53824	5.10245	3.71238	2.07557	4.17109	3.645	33.4323	NA
chr1:109180526..109180539,+	0	0	0	0	0	0	0	0	0	0	0	0	0	0	0	0	0	0	0	0	0	0	0	0	0	12.4663	Mesenchymal
chr1:109214111..109214142,+	0	0	0	0	0	0	0	0	0	0	0	0	0	0	0	0	0	0	0	0	0	0	0	0	0	10.9552	Mesenchymal
chr1:109214457..109214459,+	0.193121	0	0	0	0	0	0.24443	0	0	0.721382	0	0.31318	0.245807	0.290428	0.519352	0	0	0	0.469184	0	0	0.119754	0	0	0	13.9774	Mesenchymal
chr1:109246460..109246463,+	0	0	0	0	0	0	0	0	0	0	0	0	0	0	8.30963	0	0	9.37031	9.38367	0.64832	0	0	2.07557	0	0	0	NA
chr1:109320039..109320042,+	0	0	0	0	0	0	0	0	0	0	0	0	0	0	2.07741	1.87003	0.710148	0	0	18.8013	0	0	0	0	0	0	extraembryonic
chr1:109388050..109388053,-	0	0	0	0.403545	0.956033	0.276372	1.22215	4.47268	2.45079	7.45428	23.4886	20.3567	77.4293	91.7754	47.7804	13.5577	28.5834	7.49625	109.32	22.6912	0	0	0	0	0	0	NA
chr1:109457017..109457049,+	2.70369	1.17664	3.51579	6.77955	1.59339	3.86921	4.39973	5.96357	6.16199	3.60691	1.17443	1.87908	1.47484	1.16171	1.0387	0.701261	2.48552	1.87406	1.87673	1.29664	0	1.43705	2.07557	2.78073	2.835	3.21102	NA
chr1:109469143..109469150,+	0	0	0	0	0	0	0	0	0	0	0	0	0	0.290428	0.519352	0	0	0	0	0	0	0	0	0	0	8.87751	NA
chr1:109469896..109469912,+	2.89681	2.35327	3.51579	1.93701	1.27471	1.93461	1.95544	3.27997	4.48144	2.40461	1.76165	1.87908	2.45807	4.35643	0.519352	0.935015	1.4203	0	0.938367	0	0	0.718526	0	4.17109	1.215	1.32218	NA
chr1:109469930..109469932,-	0	0	0	0	0	0	0	0	0	0	0	0	0	0	0	0	0	0	0	0	0	0	0	0	0	0	NA
chr1:109599069..109599081,+	0.772483	1.17664	0.781286	2.58269	2.54942	2.48735	1.46658	2.08725	3.01097	7.45428	3.22969	5.32406	4.42453	5.22771	6.75157	0.701261	0.355074	0	1.40755	5.18656	5.10245	1.07779	2.07557	1.39036	1.62	0.377767	NA
chr1:109599179..109599208,-	14.484	10.0014	11.524	33.4135	24.2195	33.4411	18.0878	31.3088	27.2388	36.3096	14.3868	19.4172	14.9942	12.198	22.3321	8.88264	11.7174	24.3628	11.7296	17.5046	5.10245	16.7656	16.6045	9.73254	8.1	14.1662	NA
chr1:109599382..109599413,+	100.036	85.6003	127.154	97.335	62.1422	89.2683	76.9953	84.3846	72.1933	218.338	174.403	236.138	179.685	170.772	129.838	105.189	62.1379	26.2369	186.735	83.6333	61.2293	104.066	107.929	175.186	176.58	85.3752	NA
chr1:109623575..109623627,+	10.6216	9.41309	9.57075	19.7737	11.1537	17.6878	10.0216	8.94536	10.2933	6.97336	9.10184	10.9613	5.89937	7.55114	6.23222	10.0514	13.1377	5.62219	8.4453	11.6698	0	16.6458	22.8312	9.73254	3.645	8.49975	NA
chr1:109623628..109623642,+	5.21426	5.88318	5.66432	5.48821	3.50545	10.5022	8.31061	8.94536	9.03291	7.45428	9.10184	9.08222	9.09487	7.55114	10.9064	11.4539	7.98916	9.37031	10.322	11.0214	5.10245	8.62231	8.30226	5.56145	4.05	5.6665	NA
chr1:109674222..109674233,-	0	0	0	56.5769	61.5048	121.88	164.99	164.595	140.955	122.395	43.1603	53.5538	34.9046	162.059	85.1737	0	0.887685	0	14.5447	111.511	668.42	0	0	0	0	4.15543	extraembryonic
chr1:109700464..109700475,-	0	0	0	0.161418	1.27471	0.552745	1.22215	15.2071	17.5056	47.3708	274.523	281.236	192.221	220.435	229.553	0	0	5.62219	5.16102	464.197	204.098	0	2.07557	0	0	0	NA
chr1:109732391..109732400,-	7.53171	8.23645	6.44561	31.2344	15.6152	28.4664	24.443	27.1343	33.6809	28.3744	55.7855	35.3894	18.4355	16.264	10.387	8.18138	12.4276	7.49625	7.50694	18.153	5.10245	22.9928	8.30226	43.1013	45.765	20.5883	NA
chr1:109732414..109732425,-	1.73809	2.64743	1.17193	10.6536	7.96694	9.12029	11.2438	14.6108	11.9739	11.3017	12.3315	12.214	6.63679	3.77557	3.63546	3.27255	2.66305	1.87406	4.69184	3.88992	0	9.46059	10.3778	8.34218	8.505	2.45548	NA
chr1:109741854..109741858,-	0.193121	0.588318	0.781286	0.807089	0.318678	0.829117	0.733289	0	0.490158	0.721382	0.880823	0.93954	1.22904	0.871285	1.0387	0.467507	0.177537	1.87406	0.469184	0	0	2.51484	0	0	0	0.188883	NA
chr1:109754385..109754388,-	1.54497	1.76495	1.95321	0.968507	1.27471	1.93461	1.95544	1.78907	1.5405	3.12599	0.880823	2.81862	0.737422	1.45214	0	0	0.887685	0	0.938367	0	0	2.8741	2.07557	0	0	1.69995	NA
chr1:109754909..109754928,-	12.3597	9.70725	10.5474	18.8859	5.41752	15.4769	13.1992	13.418	19.1162	12.2635	10.8635	5.95042	5.65357	5.51814	5.19352	8.64889	7.81163	0	2.34592	1.94496	0	21.436	6.2267	5.56145	8.1	13.0329	NA
chr1:109754929..109754975,-	26.6506	23.5327	24.2199	88.6991	60.5488	92.032	77.2398	80.5083	76.6047	82.4781	58.4279	64.5151	42.5246	42.4025	36.3546	24.5441	21.1269	9.37031	15.4831	22.0429	0	56.045	53.9647	26.4169	18.225	27.3881	NA
chr1:109754983..109754984,-	0.579362	0	0	0.645671	0	1.38186	0.733289	0.894536	0.770248	0.961843	0	0.31318	0	0.580857	0.519352	0.467507	0	0	0.469184	0	0	0.119754	0	0	0.405	0	NA
chr1:109754990..109754999,-	0.579362	0.588318	0.781286	3.22836	1.91207	2.48735	3.66644	4.47268	3.43111	6.01152	2.34886	3.44498	1.96646	1.45214	1.0387	0.701261	0.710148	0	0.469184	0.64832	0	0.598771	0	0	0.405	0.56665	NA
chr1:109772352..109772359,+	0	0	0	0	0	0.276372	0	0	0	0	0	0	6.8826	12.7788	21.8128	89.5277	86.9931	163.043	170.783	0	0	0	0	0	0	0	NA
chr1:1098532..1098542,-	3.86241	5.88318	15.6257	0	0	0	0	0	0.0700226	0	0	0	0	0	0	0	0	3.74813	0.938367	0	0	0	0	0	0	0	NA
chr1:1098546..1098555,-	2.31745	7.05981	12.1099	0	0	0	0	0	0	0	0	0	0	0	0	0	0.177537	0	0.469184	0	0	0	0	0	0	0	NA
chr1:1098565..1098572,-	4.44177	4.11823	10.938	0	0	0.276372	0	0	0	0	0	0	0	0	0	0	0	0	1.87673	0	0	0	0	0	0	0	NA
chr1:109920323..109920362,-	371.95	293.276	417.597	337.202	168.262	185.722	89.9501	55.7594	73.7338	78.8711	49.0325	66.3942	57.0273	33.6897	38.9514	26.8817	33.1994	69.3403	58.6479	106.973	20.4098	11.3767	12.4534	88.9833	93.555	295.791	NA
chr1:109986711..109986718,-	3.28305	1.76495	1.17193	0	0	0	0	0	0	0	0	0	0	0	0	0	0	0	0	0	0	0	0	0	0	7.36645	NA
chr1:110032882..110032900,-	0.193121	0	0.976607	6.21459	3.82413	3.31647	4.1553	1.49089	3.01097	3.36645	2.05525	0.31318	0.983229	2.90428	3.11611	1.40252	3.19566	0	3.28428	0.64832	0	2.27533	2.07557	1.39036	0.405	0.377767	NA
chr1:110033023..110033038,+	2.70369	1.47079	0.976607	4.92324	1.91207	5.52745	1.71101	1.49089	2.1707	0.961843	0.293608	0.62636	0.491614	0.290428	0	0.233754	0.532611	0	0	0	0	0.598771	0	0	0	3.21102	NA
chr1:110033159..110033194,+	24.7194	22.3561	25.0012	193.621	126.515	149.517	100.461	86.1737	93.7602	133.937	41.6923	48.5429	32.6924	31.6567	47.261	24.5441	39.0581	46.8516	51.141	47.3274	10.2049	54.1289	53.9647	23.6362	16.605	33.6212	NA
chr1:110069189..110069199,+	1.35184	0.882477	2.14854	0.484253	0.637355	0.552745	0	2.38543	2.31075	3.12599	2.05525	1.5659	2.21226	2.32343	3.11611	0.467507	2.13044	0	8.4453	0.64832	5.10245	0.359263	0	0	2.025	2.07772	NA
chr1:110069303..110069339,+	39.3966	39.7115	57.2292	4.19686	3.82413	4.14559	6.84403	14.9089	20.0965	32.2217	32.0032	43.8452	21.3852	33.1088	24.4095	7.71387	15.9783	20.6147	60.9939	33.0643	45.922	4.43091	2.07557	136.256	107.73	55.5317	NA
chr1:110069342..110069350,+	4.24865	3.82407	7.61754	0.564962	0	0.276372	1.22215	0.298179	1.5405	1.68323	1.17443	1.25272	0.737422	0.871285	0.519352	0.233754	1.06522	0	2.34592	1.29664	5.10245	0.239509	0	13.9036	17.01	5.85538	NA
chr1:110069353..110069373,+	28.775	29.7101	66.8	2.25985	0.318678	1.38186	1.22215	1.78907	7.07228	6.49244	7.04659	10.0218	8.84906	5.51814	7.27092	3.97381	7.27901	14.9925	54.4253	6.4832	30.6147	0.83828	0	112.619	107.325	27.0103	hepatocytes
chr1:110163985..110164049,+	5.40738	4.70654	6.83625	6.21459	5.41752	7.18568	9.0439	17.5925	21.707	26.2102	32.0032	33.5103	32.9382	39.7887	42.0675	16.8303	14.9131	13.1184	38.9422	77.1501	25.5122	7.78403	12.4534	51.4434	60.345	10.3886	NA
chr1:110164050..110164066,+	0	0	0.390643	0.968507	0.318678	0.552745	1.71101	3.57814	3.78122	6.49244	8.80823	7.51632	12.0446	9.58414	14.0225	4.20757	5.85872	11.2444	9.85285	34.361	0	1.79631	0	12.5133	8.505	0.755533	NA
chr1:110164923..110164925,-	0	0	0	0	0	0	0	0	0	0	0	0	0	0	0	0	0	0	0	0	0	0	0	18.0747	8.1	0	NA
chr1:110231755..110231772,+	0	0	0	0.807089	0	0	0.977719	1.19271	2.87093	5.04968	8.51463	13.4667	14.011	10.4554	11.9451	0	0	0	0	35.6576	0	0	0	0	0	0	NA
chr1:110231782..110231793,+	0	0	0	0	0	0.552745	0.733289	4.1745	4.41142	6.01152	24.6631	31.0048	27.7762	23.2343	17.658	0	0	0	0	22.6912	0	0	0	0	0	0	NA
chr1:110235122..110235146,+	0	0	0	0	0	0	0.733289	1.78907	2.03065	3.84737	4.40412	2.19226	0.737422	0	1.55806	0	0	0	0	3.2416	0	0	0	0	0	0	NA
chr1:110273361..110273380,+	3.47617	3.52991	3.32047	2.09843	1.59339	0.829117	1.46658	2.38543	3.15102	7.45428	4.40412	4.38452	3.93291	4.066	1.55806	2.10378	2.48552	1.87406	2.8151	4.53824	5.10245	1.67656	2.07557	1.39036	3.645	3.02213	NA
chr1:110273396..110273425,+	11.3941	12.3547	9.57075	4.35828	3.18678	4.14559	2.4443	7.15629	12.8842	16.1109	13.506	12.8404	12.0446	15.1023	8.30963	2.57129	7.63409	1.87406	10.7912	5.83488	5.10245	4.43091	6.2267	40.3205	22.68	10.0108	NA
chr1:110273487..110273542,+	14.484	12.3547	13.4772	20.6615	8.92298	11.6076	11.9771	11.0326	26.0484	30.779	22.9014	20.0435	22.1226	27.0098	19.216	6.77886	14.3805	5.62219	18.2982	20.7462	10.2049	6.94575	16.6045	23.6362	21.06	22.4771	NA
chr1:110316289..110316320,+	24.1401	12.6488	11.7193	111.782	72.6585	87.8864	70.8846	45.9195	61.7599	41.8402	20.8462	24.1149	16.2233	17.4257	15.5806	6.31135	10.4747	1.87406	7.03775	21.3946	0	29.4596	35.2846	8.34218	5.67	17.3773	NA
chr1:110316321..110316344,+	12.9391	7.94229	12.3053	86.8428	53.8565	65.2239	61.3518	57.5485	68.7622	56.2678	28.7736	23.4885	18.4355	16.5544	15.5806	13.324	13.6703	11.2444	7.03775	18.8013	0	47.0634	41.5113	8.34218	4.05	14.3551	NA
chr1:110334419..110334512,+	13.3253	10.5897	23.8292	16.7875	10.1977	12.7131	12.4659	18.1889	33.1207	20.9201	36.1138	33.1971	32.2007	44.4355	21.2934	13.7915	34.7972	3.74813	25.3359	17.5046	15.3073	21.6755	16.6045	125.133	95.58	18.1328	NA
chr1:110345807..110345808,+	0	0	0	0	0	0	0	0	0	0	0.880823	2.50544	2.70388	3.19471	4.15481	0.233754	0	0	0	4.53824	0	0	0	0	0	0	NA
chr1:110376628..110376637,-	0.579362	0.294159	0.390643	0	0	0	0.24443	0	0.350113	0.240461	0.293608	0	0.245807	0	0.519352	0	0.177537	0	0	0.64832	5.10245	0	0	0	0	10.5775	Mesenchymal
chr1:110376660..110376665,-	0.772483	0.294159	0.195321	0.0807089	0	0	0	0.298179	0.210068	0	0	0.62636	0.245807	0	0	0	0.355074	0	0.469184	0	0	0	0	0	0	6.23315	NA
chr1:110393833..110393845,-	2.12433	0.588318	1.95321	2.17914	0.956033	0.829117	0.733289	1.19271	0.630203	0	0.880823	0.62636	0.737422	0.871285	1.55806	0.701261	0.355074	0	2.34592	6.4832	0	0.479017	0	2.78073	1.215	29.6547	Mesenchymal
chr1:110393847..110393864,-	1.15872	0.882477	0.976607	2.82481	0.956033	0.552745	0.24443	0	0.490158	0.240461	0.587216	0.31318	0.491614	0.290428	0	0.467507	0	1.87406	0.469184	0.64832	0	0.359263	0	0	0.81	16.9995	Mesenchymal
chr1:110393869..110393894,-	9.46291	6.76566	16.407	13.1556	1.91207	3.86921	2.93316	4.77086	3.22104	2.40461	2.64247	3.75816	3.19549	2.90428	2.07741	5.37633	5.14857	3.74813	1.87673	2.59328	0	4.31115	0	8.34218	12.555	25.6881	NA
chr1:11040825..11040840,+	64.8885	66.1858	151.569	2.58269	0	0.552745	0.488859	1.78907	5.18167	6.7329	3.52329	3.1318	6.8826	6.97028	8.82898	25.9467	50.0654	67.4663	68.5008	37.6026	20.4098	1.3173	2.07557	0	0.81	1.88883	NA
chr1:11040931..11040946,+	30.5131	43.5355	30.2748	0.484253	0.637355	0	1.71101	8.05083	7.56244	14.4276	3.8169	5.32406	4.42453	7.55114	7.27092	13.0902	9.58699	24.3628	26.7435	9.7248	10.2049	3.47287	12.4534	0	0	1.88883	NA
chr1:110484857..110484866,-	0	0	0	0	0.318678	0	0.733289	1.78907	2.1707	1.44276	2.05525	1.25272	0	0.580857	0	0	0	0	0	0	0	0.119754	0	0	1.215	0	NA
chr1:110571944..110571975,+	13.1322	4.70654	5.85964	0.484253	0	0.552745	0.488859	2.38543	1.40045	4.08783	4.99133	4.38452	3.19549	4.35643	2.07741	0.935015	2.30798	1.87406	8.91449	3.88992	0	0.83828	0	6.95182	7.695	10.3886	NA
chr1:110801919..110801930,+	0	0	0	0	0	0	0	0.298179	0.210068	0.480922	3.52329	5.95042	3.4413	1.74257	4.67417	5.84384	4.61596	7.49625	5.6302	7.77984	0	1.3173	0	5.56145	0	0	NA
chr1:110879828..110879832,-	1.35184	0.882477	1.17193	2.7441	1.27471	1.65823	2.19987	1.49089	1.47047	1.44276	1.76165	1.87908	4.17872	2.033	1.0387	3.5063	0.532611	0	2.34592	5.18656	0	3.59263	2.07557	1.39036	1.215	3.3999	NA
chr1:110980804..110980817,-	4.24865	6.4715	3.90643	3.14765	1.59339	1.93461	1.22215	1.19271	2.73088	2.16415	0.587216	1.5659	0.737422	1.45214	2.59676	4.20757	3.90581	11.2444	8.91449	4.53824	0	2.39509	2.07557	1.39036	2.025	7.36645	NA
chr1:110980826..110980848,-	2.70369	2.94159	3.90643	3.22836	2.8681	3.86921	2.4443	3.27997	4.48144	2.64507	2.93608	2.19226	1.96646	2.61386	2.59676	3.97381	3.3732	0	1.87673	7.13152	0	5.26919	4.15113	0	0.81	3.96655	NA
chr1:110980933..110980977,-	7.53171	10.8839	14.8444	18.3209	7.01091	6.63294	8.31061	9.24354	13.3743	11.7826	10.2763	8.76904	11.0613	15.6831	10.387	17.5315	18.2863	7.49625	14.0755	14.263	0	10.6581	8.30226	16.6844	12.555	14.1662	NA
chr1:110981238..110981252,-	0.386241	1.17664	1.95321	12.3485	10.1977	9.39666	6.84403	6.55993	5.74185	14.9086	15.5612	10.0218	11.0613	10.4554	19.216	12.8565	3.55074	14.9925	21.1133	32.416	0	8.62231	18.6801	4.17109	2.025	2.2666	NA
chr1:110987160..110987161,-	0	0	0	0	0	0	0	0	0	0	0	0	0	0	0	0	0	0	0.469184	0	0	0	0	0	0	0	NA
chr1:111018609..111018633,+	6.5661	9.11893	10.5474	9.68507	5.09884	7.18568	5.86631	7.15629	9.03291	11.3017	5.28494	7.51632	9.34067	5.80857	5.19352	16.8303	10.2971	1.87406	8.91449	3.2416	0	7.66427	10.3778	4.17109	4.05	5.85538	NA
chr1:111018636..111018649,+	6.37298	5.58902	4.88304	4.5197	4.46149	2.48735	2.93316	1.78907	3.29106	5.04968	4.11051	4.07134	2.21226	2.61386	2.59676	3.74006	2.30798	1.87406	1.87673	2.59328	5.10245	4.90993	10.3778	1.39036	1.62	2.64437	NA
chr1:111018690..111018726,+	11.0079	17.9437	10.1567	14.5276	8.92298	8.29117	10.266	11.3308	13.8645	13.9467	19.0845	12.214	16.2233	15.6831	15.0612	10.5189	12.4276	11.2444	12.1988	10.3731	0	16.0471	14.529	16.6844	16.605	5.85538	NA
chr1:1110482..1110491,-	0.193121	0	0.195321	3.38977	0.637355	1.10549	0.488859	1.19271	0.840271	0.721382	0.293608	0.31318	0	0	0	0	0.177537	0	0	0	0	0.239509	0	2.78073	1.215	0.188883	NA
chr1:1110492..1110512,-	0.772483	1.47079	0.585964	10.3307	4.46149	4.14559	0.977719	0.596357	1.61052	0.721382	3.22969	2.19226	0.737422	1.45214	0	0.935015	1.4203	0	0.469184	0	0	0.718526	0	1.39036	0.81	1.1333	NA
chr1:111056456..111056474,+	0.772483	1.47079	1.17193	2.66339	1.59339	0.276372	0.733289	0	0.140045	0	0.293608	0	0.491614	0.290428	1.0387	2.33754	1.77537	3.74813	3.28428	1.29664	0	0.359263	0	2.78073	0.405	0.944416	NA
chr1:111070089..111070097,+	0	0	0	3.95474	1.27471	1.38186	0.488859	0	0.0700226	0	0	0	0	0	0	0	0	0	0	0	0	0	0	0	0	0	NA
chr1:111184723..111184729,+	0.965603	0	0.195321	0	0	0	0.24443	0.596357	2.24072	2.16415	0	0.31318	0.245807	0	1.0387	0.701261	0.710148	1.87406	1.40755	0	0	0.119754	0	0	0	0	NA
chr1:111252088..111252113,+	13.3253	12.943	13.2819	4.5197	12.7471	10.2258	6.84403	10.1381	4.13133	4.56876	2.05525	2.81862	3.68711	2.32343	2.07741	2.57129	8.1667	0	5.16102	1.29664	20.4098	4.67042	8.30226	15.294	25.11	8.87751	NA
chr1:111252147..111252177,-	99.8434	139.137	110.747	8.55515	45.2522	26.8081	27.865	35.7814	7.63246	18.275	15.8548	10.3349	13.2736	21.4917	8.30963	17.064	52.7285	11.2444	6.09939	8.42816	15.3073	12.8137	8.30226	326.735	166.05	78.7643	NA
chr1:111331974..111331988,-	0.386241	0.588318	0.390643	0.161418	0	0	0.24443	0	0.210068	0.721382	0	0.62636	0.491614	0.580857	2.07741	1.40252	2.30798	0	3.75347	3.88992	5.10245	0.119754	0	8.34218	4.455	6.42203	NA
chr1:1117552..1117579,+	4.6349	3.82407	5.469	11.2185	3.82413	6.90931	2.93316	4.47268	2.45079	1.92369	1.76165	1.25272	1.47484	1.74257	3.63546	2.33754	4.08335	0	6.56857	1.29664	20.4098	2.27533	4.15113	9.73254	9.71999	2.07772	NA
chr1:1117592..1117599,+	0	0.588318	0.195321	1.21063	0	0.829117	0.488859	0	0.630203	0	0.293608	0	0	0.290428	0	0.233754	0.532611	0	0	0	0	0	0	9.73254	7.29	0.56665	NA
chr1:111776786..111776807,+	2.89681	0.882477	1.56257	5.08466	2.23074	3.31647	4.64416	5.36722	7.21233	7.93521	2.64247	5.95042	2.45807	5.22771	6.75157	1.40252	2.84059	5.62219	2.34592	7.13152	0	1.67656	10.3778	1.39036	1.62	2.64437	NA
chr1:111776895..111776920,+	3.47617	5.29486	3.71111	4.5197	4.46149	5.25108	4.88859	8.349	7.84253	3.60691	4.99133	2.50544	5.16195	4.35643	6.23222	2.57129	10.4747	0	10.322	7.77984	0	3.23337	4.15113	1.39036	0.405	4.15543	NA
chr1:111873604..111873607,+	0.772483	0.882477	0.195321	0.242127	0.956033	0.276372	0	0	0	0.721382	0.293608	2.50544	0	0.580857	1.55806	3.5063	0.355074	0	0	3.88992	0	2.27533	0	0	0	1.51107	NA
chr1:111877944..111877950,-	0	0	0	0	0	0	0	0	0	0	0	0	0	0	0	0	0	0	0	0	0	0	0	0	0	0	NA
chr1:111897037..111897049,-	0	0	0	0	0	0	0	0	0	0	0	0	0.491614	0.871285	0.519352	0.701261	0.887685	1.87406	0.938367	0	0	0	0	16.6844	12.555	27.7658	NA
chr1:111897058..111897063,-	0	0	0	0	0	0	0	0	0	0	0	0	0	0	0	0	0.355074	0	0.469184	1.29664	0	0	0	1.39036	1.215	7.9331	NA
chr1:111897069..111897080,-	0	0	0	0	0	0	0	0	0	0	0	0	0.245807	0.290428	0	0.935015	1.4203	5.62219	0	1.29664	5.10245	0.119754	0	12.5133	12.555	24.7437	NA
chr1:111901018..111901019,+	0.386241	1.76495	0.195321	0.161418	0.637355	2.21098	0.733289	0.298179	0	2.16415	0.587216	1.25272	0.737422	3.48514	6.75157	3.0388	5.32611	1.87406	2.8151	1.29664	0	3.23337	4.15113	0	0.405	0.755533	NA
chr1:11191094..11191111,-	0	0	0	0	0	0	0	0	0	0	0	0	0	0	0	0	0	0	0	0	0	0	0	0	0	0	NA
chr1:111936994..111937001,+	0.386241	3.52991	3.71111	0.0807089	0	0	0	0	0	0	0	0.31318	0.245807	0.290428	0	0.233754	0.177537	0	0.469184	0.64832	0	0	0	0	0	0	NA
chr1:111945213..111945245,+	111.624	142.961	138.874	5.81104	108.988	27.3609	26.8873	32.5015	4.76154	23.8056	35.8201	40.4002	35.8878	38.9174	33.2385	35.9981	70.3046	86.2069	29.0894	47.3274	45.922	33.651	33.209	387.911	340.605	88.3974	NA
chr1:111957293..111957299,+	0	0	0	0.242127	0.318678	0	0.488859	0	0.560181	0.480922	1.17443	0	0.245807	0	0	0.701261	5.14857	0	0.469184	0	0	0.239509	0	0	0	0	NA
chr1:111965961..111965965,+	2.12433	2.64743	0.976607	0.807089	0.637355	0.276372	0	1.78907	0.560181	0.961843	1.76165	0.62636	0.737422	1.16171	3.63546	3.5063	1.59783	1.87406	4.69184	1.94496	0	2.39509	2.07557	0	0.81	0.755533	NA
chr1:111982973..111982978,+	10.2354	19.7087	10.1567	4.92324	6.69223	12.4368	11.7326	9.54172	4.48144	11.3017	15.5612	14.4063	9.34067	23.5247	6.75157	17.064	8.87685	1.87406	7.50694	7.13152	0	10.8976	8.30226	1.39036	2.025	3.02213	NA
chr1:112038981..112038995,-	237.152	206.794	231.456	559.313	130.021	201.752	193.099	157.737	322.594	217.857	182.918	158.469	132.244	127.208	85.1737	181.159	140.787	24.3628	100.874	75.8535	66.3318	204.301	101.703	147.379	131.625	225.149	NA
chr1:11206445..11206454,-	0	0	0	0	0	0	0	0	0	0	0	0	0.491614	0	0	0.233754	1.4203	0	14.0755	0	0	0	0	171.015	159.165	0	late
chr1:11206476..11206480,-	0	0	0	0	0	0	0	0	0	0	0	0	0	0	0	0	0.532611	0	1.87673	0	5.10245	0	0	44.4916	31.995	0	hepatocytes
chr1:11206482..11206493,-	0	0	0	0	0	0	0	0	0	0	0	0.31318	0	0	0	0	0.887685	0	7.03775	0	0	0	0	154.33	140.94	0	hepatocytes
chr1:112065307..112065317,+	7.53171	2.94159	3.51579	72.2345	41.7468	51.4053	46.6861	38.1669	34.5912	31.9813	10.8635	9.3954	5.89937	1.74257	1.55806	0.701261	1.59783	3.74813	0.938367	1.94496	0	10.4186	22.8312	0	0	3.21102	NA
chr1:112065340..112065357,+	213.785	126.783	128.131	334.054	243.151	343.807	352.712	325.015	363.837	345.542	310.931	284.054	198.366	185.584	109.583	79.71	73.3228	50.5997	63.809	137.444	40.8196	294.715	286.428	87.5929	70.47	124.285	NA
chr1:112065366..112065381,+	1833.87	1915.27	2231.16	654.307	666.355	1025.34	1083.8	1168.26	1024.01	1487.01	2591.38	2722.16	2850.38	3007.39	3176.35	2529.45	2004.04	4458.4	5283.01	6019.65	1801.16	2055.7	3466.19	2709.82	1801.03	1451.19	NA
chr1:112065385..112065392,+	2.51057	2.35327	1.17193	4.76183	2.8681	5.52745	6.5996	4.77086	6.30203	5.29014	3.22969	2.81862	2.21226	1.16171	0.519352	0.935015	0.887685	0	0.469184	1.29664	0	4.43091	4.15113	0	0.405	0.944416	NA
chr1:112065405..112065409,+	7.72483	3.82407	4.29707	25.0198	16.8899	26.5318	24.9318	25.6434	41.2433	34.1454	21.727	16.9117	9.09487	6.67985	4.15481	3.97381	7.45655	0	0.938367	0	0	24.0706	14.529	1.39036	2.025	4.15543	NA
chr1:112065558..112065592,+	48.2802	39.1231	48.6351	72.9609	21.9888	30.9537	35.6867	30.1161	85.7076	30.5385	47.2709	41.0266	32.2007	33.1088	1.55806	25.0116	24.6776	1.87406	0.469184	2.59328	0	22.2743	8.30226	15.294	35.64	39.0988	NA
chr1:112065673..112065685,+	2.12433	0.588318	0.976607	2.98623	3.18678	4.9747	6.84403	9.24354	4.20135	7.45428	6.75298	3.75816	5.65357	6.099	7.27092	5.61009	1.77537	7.49625	7.03775	7.13152	5.10245	5.98771	4.15113	4.17109	1.215	1.69995	NA
chr1:112066993..112067004,+	1.15872	0.294159	0.390643	1.21063	1.27471	3.86921	1.95544	1.19271	1.96063	1.44276	2.64247	1.87908	1.22904	2.90428	2.59676	2.33754	0.887685	3.74813	1.40755	1.29664	0	2.51484	2.07557	1.39036	1.62	1.51107	NA
chr1:112067012..112067030,+	2.70369	3.23575	2.92982	2.25985	2.8681	2.76372	9.0439	5.36722	2.24072	6.49244	10.5699	4.6977	7.12841	9.29371	7.27092	8.41513	2.13044	9.37031	9.38367	11.6698	5.10245	7.54452	4.15113	4.17109	3.24	2.83325	NA
chr1:11209630..11209632,-	0	0	0	0	0	0	0	0	0	0	0	0	0.491614	0.871285	3.11611	0.701261	3.01813	5.62219	40.819	1.29664	0	0	0	9.73254	5.67	1.32218	late
chr1:112176684..112176693,-	2.89681	1.17664	2.92982	7.90947	1.59339	1.65823	3.42202	2.38543	3.78122	5.5306	1.76165	3.1318	2.21226	3.77557	3.63546	2.10378	1.4203	1.87406	0.938367	3.2416	0	1.79631	0	1.39036	2.835	6.61091	NA
chr1:112176716..112176730,-	11.9735	9.70725	9.57075	17.191	4.78017	6.08019	4.39973	5.6654	10.9935	7.93521	6.16576	5.63724	4.91614	4.64685	2.07741	1.63628	3.90581	0	1.40755	0.64832	5.10245	4.67042	4.15113	6.95182	6.885	24.7437	NA
chr1:112176731..112176770,-	39.0104	42.9472	45.5099	58.514	23.5822	28.7427	26.8873	26.8361	48.8057	28.6148	18.4973	30.0653	22.6143	18.5874	21.8128	12.8565	22.1921	3.74813	23.4592	33.0643	20.4098	12.2149	8.30226	26.4169	25.92	74.6089	NA
chr1:112176868..112176885,-	0.579362	1.17664	1.36725	4.03545	0.637355	2.21098	1.46658	0.894536	3.57115	1.92369	2.05525	1.5659	0.983229	0.871285	0.519352	1.16877	2.48552	0	0.469184	0	0	0.598771	0	0	0.405	2.2666	NA
chr1:112176929..112176974,-	0.965603	2.94159	1.17193	7.90947	2.54942	3.86921	2.4443	3.57814	3.64117	4.56876	0.587216	2.81862	2.70388	2.033	2.07741	2.57129	2.66305	0	2.8151	1.94496	0	1.07779	0	1.39036	0.81	1.1333	NA
chr1:112227867..112227899,+	22.0158	25.886	22.462	84.9865	33.7798	45.0487	34.2202	39.0614	58.889	54.8251	32.2969	35.3894	25.5639	31.0758	23.8902	19.4016	31.069	3.74813	15.0139	21.3946	10.2049	19.4002	20.7557	23.6362	18.225	19.2661	NA
chr1:112227900..112227908,+	2.31745	1.47079	1.95321	6.05317	3.50545	1.93461	1.46658	1.19271	2.52081	4.80922	2.05525	0.93954	2.21226	2.32343	1.0387	1.16877	1.06522	0	1.40755	1.94496	5.10245	1.07779	4.15113	0	0.81	0.755533	NA
chr1:112282308..112282333,-	16.6084	14.4138	24.4152	16.0611	14.6592	20.1752	19.0655	11.0326	17.6457	11.3017	9.10184	10.6481	12.782	9.58414	9.86768	3.97381	9.58699	11.2444	23.9284	9.07648	0	3.59263	2.07557	9.73254	8.505	94.8194	NA
chr1:112282335..112282344,-	2.89681	2.35327	3.90643	2.25985	1.91207	2.48735	1.46658	1.49089	2.8009	3.12599	1.76165	2.19226	1.22904	1.16171	0.519352	0.701261	2.48552	0	1.87673	0	0	0.359263	0	1.39036	4.455	7.17756	NA
chr1:112282356..112282388,-	18.7327	35.8874	32.4234	8.07089	7.32959	8.0148	10.0216	10.4363	13.1642	11.0612	6.45937	8.76904	8.35744	9.00328	12.4644	7.48012	15.2682	18.7406	22.99	30.4711	20.4098	2.8741	4.15113	43.1013	20.25	50.6207	NA
chr1:112365909..112365920,+	0	1.17664	0.390643	1.93701	1.27471	1.10549	0.488859	1.49089	1.19038	1.2023	1.17443	0	1.72065	2.32343	1.55806	1.63628	3.55074	0	0.938367	2.59328	0	1.91607	2.07557	0	0	1.51107	NA
chr1:112373375..112373378,+	0	0	0	0.807089	1.91207	3.31647	0.24443	0	0.140045	0.240461	0	0	0	0	0	0	0	0	0	0	0	0.119754	0	0	0	0	NA
chr1:112378321..112378337,+	0	0	0	4.84253	0.318678	3.31647	0.977719	0.298179	0.28009	0.240461	0	0.31318	0	0	0	0	0	0	0	0	0	0	0	0	0	0	NA
chr1:112378530..112378541,+	0.386241	0.588318	0.195321	3.30907	2.23074	1.10549	0.733289	0.596357	0.700226	1.44276	0.293608	1.87908	0.245807	0.871285	1.55806	1.16877	1.59783	0	3.75347	1.94496	0	1.79631	0	0	1.62	0	NA
chr1:112739757..112739770,-	10.2354	7.94229	13.6725	27.5217	9.87901	13.5422	14.4214	27.4324	33.5408	20.6796	25.8375	35.7025	25.5639	30.7854	33.2385	8.18138	16.866	14.9925	29.5586	49.2723	10.2049	7.18526	18.6801	19.4651	27.945	51.754	NA
chr1:112739918..112739926,-	0.579362	0.882477	0.390643	2.50198	0.637355	0.276372	0.488859	0.298179	1.5405	2.16415	1.46804	1.5659	0.983229	1.74257	0	0.233754	1.4203	0	2.34592	0.64832	0	0.239509	0	1.39036	0.405	2.45548	NA
chr1:112740017..112740031,-	2.51057	1.47079	1.17193	6.05317	2.8681	3.0401	2.4443	4.47268	7.56244	7.45428	4.40412	7.8295	4.91614	7.55114	7.79028	7.24636	4.43842	3.74813	9.38367	12.3181	0	8.50255	8.30226	9.73254	2.025	2.45548	NA
chr1:112766575..112766579,-	0	0.294159	0	0.0807089	0.318678	0.276372	0.24443	0.298179	0	0	0.293608	0.31318	0	1.16171	1.55806	5.61009	4.26089	3.74813	0.938367	0	0	0.479017	2.07557	4.17109	0.405	0.188883	NA
chr1:112855776..112855795,-	1.73809	1.47079	0.390643	2.17914	0.637355	0.552745	2.4443	0.894536	1.96063	1.92369	2.05525	3.1318	5.89937	12.198	46.2223	85.7876	80.7793	151.799	105.097	15.5597	5.10245	9.10132	4.15113	13.9036	14.175	2.45548	late
chr1:112855798..112855809,-	0.193121	1.17664	0.390643	0.564962	0.318678	0.829117	0.24443	0.298179	0.980316	0.961843	0	0.93954	0.983229	1.74257	4.67417	9.35015	13.4928	16.8666	21.5824	2.59328	0	3.23337	6.2267	1.39036	0.81	0.56665	late
chr1:112855815..112855826,-	0.579362	0.294159	1.56257	1.21063	0.637355	0.829117	1.22215	0.298179	1.82059	0.480922	0.880823	1.25272	2.45807	3.19471	1.55806	17.2978	17.7537	0	7.03775	0	0	3.95189	4.15113	0	2.025	2.2666	NA
chr1:112924484..112924501,-	0	0	0	0	0	0	0	0	0	0	3.22969	5.32406	45.7201	42.4025	42.5868	0	0	1.87406	0.938367	104.38	25.5122	0	0	0	0	0	NA
chr1:112924513..112924516,-	0	0	0	0	0	0	0	0	0	0	0	0	2.94969	1.16171	1.55806	0.233754	0	0	0	3.88992	0	0	0	0	0	0	NA
chr1:112924526..112924539,-	0	0	0	0	0	0	0	0	0	0	0	2.81862	14.2568	13.3597	10.9064	0.233754	0	0	0.469184	42.1408	10.2049	0	0	0	0	0	NA
chr1:112924540..112924556,-	0	0	0	0	0	0	0	0	0	0	0.293608	2.19226	11.0613	18.0066	13.5031	0.233754	0	0	1.40755	54.4589	51.0245	0	0	0	0	0	NA
chr1:112926171..112926203,+	8.69043	10.0014	6.83625	19.128	14.6592	13.8186	11.4882	11.3308	14.7047	12.9849	9.68906	9.70858	11.5529	11.9076	13.5031	14.0252	15.9783	9.37031	25.3359	11.0214	5.10245	15.3285	12.4534	6.95182	9.71999	5.09985	NA
chr1:112995141..112995152,+	3.08993	12.6488	0.976607	0.322836	0	0.276372	0.488859	0	0.980316	1.2023	0.293608	0.62636	0	0.580857	0.519352	3.74006	3.72828	1.87406	0.938367	0	0	1.55681	0	0	0	0.188883	NA
chr1:112995155..112995173,+	15.2565	58.2435	6.44561	2.66339	2.8681	4.69833	1.95544	3.87632	4.13133	2.88553	3.8169	2.50544	3.4413	7.26071	8.82898	10.9864	14.3805	18.7406	16.4214	6.4832	5.10245	7.18526	12.4534	0	0	1.1333	NA
chr1:113133102..113133152,+	69.1372	121.782	83.9882	37.7718	15.9339	15.2005	12.9548	11.0326	15.7551	6.49244	4.99133	7.20314	5.65357	7.84157	11.4257	10.2852	21.482	16.8666	35.1888	12.3181	20.4098	3.35312	0	95.9351	55.485	51.1874	NA
chr1:113133156..113133164,+	5.40738	5.29486	7.81286	3.22836	1.27471	0.276372	0.977719	0.596357	1.33043	0.240461	0.880823	2.19226	1.96646	0.871285	1.55806	0.467507	0.532611	1.87406	1.87673	1.94496	5.10245	0.598771	0	19.4651	4.455	2.45548	NA
chr1:113183625..113183626,-	0	0	0	0	0	0	0	0	0	0	0	0	0	0	0	0	0.177537	0	0	0	0	0	0	0	0	4.72208	NA
chr1:113183627..113183634,-	0	0	0	0	0	0	0	0	0	0	0	0	0	0.290428	0.519352	0	0	0	0.469184	1.29664	0	0	0	0	0	32.8657	Mesenchymal
chr1:113183640..113183661,-	0	0	0	0	0	0	0	0	0	0	0	0	0.245807	0.580857	1.0387	1.16877	0.887685	5.62219	2.34592	1.29664	0	0.239509	2.07557	16.6844	8.91	550.028	NA
chr1:113183663..113183671,-	0	0	0	0	0	0	0	0	0	0	0	0	0	0	0	0.233754	0	0	0	0.64832	0	0	0	0	1.215	62.1426	Mesenchymal
chr1:113183672..113183676,-	0	0	0	0	0	0	0	0	0	0	0	0	0	0	0	0	0	0	0	0	0	0	0	0	0	41.7432	Mesenchymal
chr1:113183677..113183693,-	0	0	0	0.0807089	0	0	0	0	0	0	0	0	0.491614	0.580857	0	0.701261	0.355074	0	0.938367	0	0	0.119754	0	1.39036	1.62	223.638	Mesenchymal
chr1:113183695..113183706,-	0	0	0	0	0	0	0	0	0	0	0	0	0	0	0	0	0.355074	0	0.469184	0	0	0	0	0	0	127.685	Mesenchymal
chr1:113194872..113194881,-	0	0	0	9.44294	1.91207	3.0401	1.71101	2.98179	4.41142	2.16415	0	0	0	0	0	0	0	0	0	0	0	0	0	0	0	0	NA
chr1:113194897..113194909,-	0	0	0	37.5296	8.92298	14.9241	15.1546	22.6616	23.8777	9.13751	0.293608	0	0	0.290428	0	0	0	0	0	0	0	0	0	0	0	0	NA
chr1:113195089..113195103,-	0	0	0	3.55119	0.318678	1.10549	2.68873	3.57814	10.3633	3.12599	0.293608	0	0	0.290428	0	0	0	0	0	0	0	0	0	0	0	0	NA
chr1:113195133..113195141,-	0	0	0	1.37205	0	0.276372	0.733289	1.19271	3.29106	1.44276	0	0	0.245807	0	0	0	0	0	0	0	0	0	0	0	0	0	NA
chr1:113286465..113286469,-	1.15872	4.11823	0.585964	2.34056	1.91207	1.10549	1.22215	0.894536	0.490158	1.68323	0.587216	0.31318	0	1.16171	0	0.467507	1.06522	0	0.469184	0	0	1.55681	0	1.39036	1.215	0.56665	NA
chr1:113314019..113314064,-	34.9548	47.6538	51.5649	62.388	14.3405	17.1351	16.6212	13.1199	20.5866	18.9964	7.04659	10.0218	5.40776	7.26071	6.23222	6.5451	13.4928	9.37031	12.1988	5.18656	5.10245	9.10132	8.30226	12.5133	10.935	7.55533	NA
chr1:1134303..1134315,-	0	0	0	0.0807089	0	0	0	0	0	0.240461	0.293608	0.31318	0.245807	0.580857	2.59676	2.10378	12.6051	7.49625	14.0755	0	0	0.479017	4.15113	0	0	0	NA
chr1:113801066..113801070,-	1.73809	3.82407	1.95321	0.242127	1.59339	1.93461	2.19987	0.596357	0.140045	1.2023	3.22969	1.5659	3.93291	7.26071	2.07741	3.0388	0.887685	13.1184	5.16102	7.13152	10.2049	1.79631	2.07557	1.39036	3.645	1.32218	NA
chr1:1138541..1138548,-	43.6453	25.886	26.9544	10.8957	12.1098	16.306	15.3991	8.349	6.16199	8.41613	20.8462	11.2745	13.0278	15.1023	10.9064	11.6877	20.0617	18.7406	28.6202	7.13152	0	19.1607	6.2267	2.78073	2.025	15.1107	NA
chr1:113937242..113937254,+	15.6428	15.5904	17.1883	2.17914	0	0.552745	0.24443	1.19271	1.19038	0.961843	1.76165	4.6977	9.58648	9.87457	10.9064	14.9602	23.6124	11.2444	20.1749	9.7248	0	2.75435	2.07557	2.78073	0	0	NA
chr1:11403546..11403557,-	37.4654	36.7699	39.6503	140.595	47.483	52.2344	31.0426	27.7306	41.5934	19.7178	15.2676	21.6094	18.4355	18.297	23.3708	23.6091	29.2936	11.2444	16.8906	32.416	5.10245	26.7052	29.0579	1.39036	0.405	20.3994	NA
chr1:114036300..114036303,-	0	0	0	4.68112	1.91207	2.76372	1.22215	0.894536	0.140045	0.480922	0.880823	0.31318	0	0.290428	0	0	0	0	0	0	0	0	0	0	0	0	NA
chr1:11403640..11403659,-	1.73809	0.294159	1.95321	15.7382	4.78017	3.86921	2.68873	3.27997	3.43111	6.97336	3.52329	5.63724	4.17872	2.90428	3.11611	1.63628	0.177537	3.74813	3.28428	2.59328	0	4.90993	4.15113	0	0.81	1.32218	NA
chr1:11403682..11403689,-	0.965603	1.17664	2.14854	3.14765	1.59339	1.93461	1.46658	0.596357	1.33043	1.92369	1.46804	1.25272	0.737422	0.871285	1.55806	0.935015	0.532611	0	2.34592	1.29664	0	0.83828	2.07557	0	0	0.755533	NA
chr1:11403720..11403743,-	10.6216	9.11893	11.7193	15.7382	6.05488	6.35657	4.39973	2.68361	3.43111	5.77106	4.40412	4.38452	4.91614	4.64685	5.71287	5.84384	4.7935	5.62219	6.09939	7.13152	5.10245	5.62845	12.4534	1.39036	0.405	4.91097	NA
chr1:11403746..11403762,-	7.91795	5.88318	12.5006	17.2717	3.82413	8.0148	3.17759	2.68361	4.27138	3.36645	2.05525	2.81862	2.45807	4.64685	0.519352	0.935015	3.19566	0	0.938367	0	10.2049	2.8741	0	1.39036	1.215	4.5332	NA
chr1:114045155..114045202,-	0	0	0	23.3249	6.69223	8.0148	6.5996	2.68361	5.04163	1.92369	0.880823	0	0.491614	0.580857	0	0	0	0	0	0	0	0	0	0	0	0	early
chr1:114100365..114100375,-	0.193121	1.76495	0.195321	0.322836	0.956033	0.552745	1.71101	2.98179	0.490158	5.04968	0.587216	0.93954	4.91614	0	0.519352	6.0776	8.1667	0	0	9.07648	0	4.07165	0	69.5182	43.335	0.188883	hepatocytes
chr1:114319700..114319706,+	0.386241	0	0	0.0807089	0	0	0	0	0.560181	0	0	0	0	1.16171	0	0.935015	4.26089	0	5.16102	0	0	0	0	0	0	0	NA
chr1:114486779..114486801,+	8.88355	12.943	8.2035	1.21063	0.318678	0.276372	0	0	0.140045	0.480922	0.587216	2.19226	3.19549	2.033	6.75157	5.61009	10.8298	11.2444	21.1133	7.77984	5.10245	0	0	11.1229	7.695	0.56665	NA
chr1:11455105..11455109,-	0	0	0	0	0	0	0	0	0	0	0	0	0	0	0	0	0	0	0	0	0	0	0	0	0	0	NA
chr1:114751895..114751897,-	0	0	0	0	0	0	0	0	0	0	0	0	0	0	0	0	0	0	0	0	0	0	0	0	0	0	NA
chr1:114763203..114763205,+	0.193121	0.294159	0	0	0	0	0	0	0	0	2.64247	0.31318	0	0.871285	0.519352	4.67507	0.710148	0	2.34592	0.64832	0	0.479017	0	0	0	0	NA
chr1:1148682..1148695,-	114.327	110.604	100.005	33.0907	22.3074	25.7026	33.9757	32.5015	33.8209	41.5997	30.8288	25.0544	24.3349	31.0758	49.8578	53.9971	59.8299	116.192	130.902	73.9085	15.3073	28.1423	24.9068	8.34218	8.505	42.6876	NA
chr1:114951218..114951219,-	0	0	0	0	0	0	0	0	0	0	0	0	0	0	0	0	0	0	0	0	0	0	0	0	0	0	NA
chr1:114957565..114957576,+	0	0	0	0.807089	0.956033	0.276372	0.977719	0.894536	0.840271	1.2023	2.05525	0.93954	0.983229	1.16171	3.11611	9.35015	5.14857	7.49625	9.85285	0	0	0.119754	0	0	0	0	NA
chr1:115400383..115400403,+	3.08993	1.17664	1.17193	8.39373	4.14281	11.3313	10.7549	14.6108	19.8864	15.149	13.506	9.70858	10.0781	15.1023	11.9451	6.77886	7.10148	3.74813	8.91449	23.9878	0	2.51484	2.07557	11.1229	5.67	0	NA
chr1:115400419..115400429,+	2.31745	1.17664	2.14854	1.69489	0.318678	0.829117	1.95544	3.87632	5.8819	5.04968	4.11051	7.20314	6.14518	2.61386	11.4257	3.0388	6.92394	3.74813	8.91449	9.07648	0	0.718526	2.07557	19.4651	8.1	0	NA
chr1:115446440..115446447,+	0.579362	2.05911	0.390643	0.161418	0	0.552745	1.22215	0.894536	0.140045	1.44276	2.34886	8.14268	2.21226	4.93728	1.0387	6.77886	0.710148	1.87406	0.938367	3.2416	0	4.07165	2.07557	2.78073	2.835	1.1333	NA
chr1:115661237..115661244,+	0	0	0	1.85631	0.956033	0.276372	0.977719	1.19271	0.700226	0.240461	0.293608	0	0	0	0	0	0	0	0	0	0	0.479017	0	0	0.405	0	NA
chr1:115661264..115661288,+	0.386241	0.294159	0.195321	7.99018	3.82413	4.69833	3.91087	3.57814	6.37205	3.84737	2.05525	1.5659	2.21226	2.90428	0.519352	0.701261	1.4203	1.87406	0	1.94496	5.10245	0.718526	2.07557	0	0.81	0.377767	NA
chr1:115661653..115661696,+	14.2909	17.3554	14.0631	20.5808	6.05488	9.12029	9.28833	12.2253	18.626	16.5918	7.92741	15.3458	8.60325	11.3267	9.34833	3.97381	11.5399	9.37031	12.1988	14.9114	10.2049	4.90993	10.3778	13.9036	11.745	20.966	NA
chr1:115661705..115661725,+	1.93121	0.588318	2.53918	10.25	2.8681	4.69833	5.37745	3.57814	6.23201	6.25198	1.17443	5.95042	2.21226	3.48514	5.71287	1.63628	5.68118	1.87406	2.34592	5.83488	0	2.03582	6.2267	2.78073	2.835	2.83325	NA
chr1:115661735..115661744,+	0.193121	0.588318	0	3.47048	0	1.65823	0.977719	0	1.96063	1.68323	0.880823	1.25272	0.245807	0	0	0.233754	0.710148	0	0	0	0	0.718526	0	0	0	0.377767	NA
chr1:115661749..115661783,+	1.35184	1.47079	0.781286	40.3545	15.9339	15.7532	10.9993	12.5235	20.0965	22.3629	8.51463	8.45586	7.12841	7.26071	5.71287	4.90883	6.7464	0	5.6302	7.13152	0	6.70624	8.30226	4.17109	0.405	5.28873	NA
chr1:115768559..115768576,-	23.7538	20.297	18.3602	18.0788	4.46149	8.0148	10.0216	14.6108	22.4772	25.2484	35.2329	40.7134	41.2956	27.3003	28.5643	7.94762	9.40946	9.37031	25.3359	42.7891	20.4098	5.26919	8.30226	225.239	189.945	85.1864	NA
chr1:115787443..115787454,+	0	0	0	0	0	0	0	0	0	0	0	0	0.245807	0	0	0.467507	0.177537	0	0	0	0	0.119754	0	0	0	9.25528	NA
chr1:115789739..115789743,+	0	0	0	0	0	0	0	0	0	0	0	0	0	0	0	0	0	0	0	0	0	0	0	0	0	0	NA
chr1:115909408..115909417,+	0	0	0	2.01772	2.23074	0.552745	0.977719	0	0.140045	0	0.293608	0.31318	0.491614	0.580857	1.0387	0.467507	0.532611	0	0.469184	2.59328	5.10245	0.239509	0	1.39036	1.62	0	NA
chr1:115909476..115909481,+	0.386241	0	0	15.8189	8.28562	8.29117	2.19987	1.19271	0.770248	0.721382	2.34886	11.2745	3.4413	2.033	11.4257	3.0388	4.26089	7.49625	6.09939	14.263	20.4098	0.239509	0	43.1013	34.425	0	NA
chr1:11695367..11695405,+	62.378	61.4792	49.221	2.82481	2.54942	2.48735	1.46658	1.49089	2.66086	2.64507	2.05525	1.87908	4.67034	9.00328	25.4482	20.8041	33.0219	50.5997	44.1033	33.0643	5.10245	5.38894	6.2267	5.56145	4.455	10.5775	NA
chr1:117125047..117125062,+	3.08993	1.17664	2.7345	0.645671	0	0.829117	0.977719	0.596357	0.210068	0	1.17443	1.25272	1.22904	0.871285	0	1.87003	0.177537	0	0.469184	1.29664	0	0.718526	0	0	0	2.07772	NA
chr1:117125078..117125090,+	7.91795	2.05911	4.88304	1.45276	0.637355	1.93461	0.977719	0.298179	0.420135	2.16415	4.99133	5.63724	5.16195	7.26071	4.15481	3.27255	1.06522	7.49625	4.69184	0.64832	5.10245	2.27533	2.07557	0	3.645	4.34432	NA
chr1:117279400..117279402,-	0	0	0	1.93701	3.18678	2.76372	0.488859	0	0	0.240461	0	0.31318	0	0.871285	0	0	0	0	0	0	0	0	0	0	0	0	NA
chr1:117304578..117304583,-	0	0	0	3.71261	4.46149	3.0401	1.71101	0.298179	0.140045	0.721382	0.293608	1.87908	0.245807	1.74257	0.519352	0	0	0	0	1.29664	0	0	0	0	0	0	NA
chr1:117336385..117336389,-	0	0	0	1.61418	0.637355	1.10549	0.24443	0	0	0	0	0	0	0	0	0	0	0	0.469184	0	10.2049	0	0	0	0	0	extraembryonic
chr1:117356390..117356397,-	0	0	0	2.66339	1.27471	0.552745	0.24443	0	0	0	0.293608	0	0.245807	0	0	0.233754	0	0	0	0	0	0	0	0	0	0	NA
chr1:117839155..117839159,+	0	0	0	1.53347	0.318678	0	0.24443	0.298179	0.630203	1.2023	0.293608	0.31318	1.47484	1.74257	2.07741	4.20757	5.68118	0	0.938367	0.64832	0	0	0	0	0	0	NA
chr1:117841980..117841987,+	0	0	0	0	0	0	0	0	0.0700226	0	0	0	0	0	0.519352	0	0	0	0.469184	0	0	0	0	0	0	0	NA
chr1:117936370..117936371,-	0.193121	0	0	0.968507	0.956033	0.829117	0.977719	0	0.140045	0.961843	0	0.93954	0	0	0	0.467507	0	0	0	0	0	0.958034	0	0	0	0	NA
chr1:118037127..118037166,-	9.26979	4.11823	5.66432	65.7778	35.6919	45.3251	42.2863	36.0796	49.8561	41.5997	25.8375	21.6094	19.4188	17.4257	23.3708	26.6479	20.0617	13.1184	15.0139	19.4496	5.10245	43.7103	29.0579	11.1229	3.24	8.49975	NA
chr1:118139519..118139561,-	11.9735	15.2963	17.1883	18.2402	5.09884	8.29117	8.55504	6.85811	12.1839	9.13751	9.10184	13.4667	14.2568	13.6501	18.6967	9.11639	18.8189	28.1109	45.5108	8.42816	5.10245	10.0594	12.4534	43.1013	42.525	23.6104	NA
chr1:118139565..118139583,-	5.6005	4.11823	4.88304	3.6319	2.23074	2.76372	2.93316	2.08725	3.78122	5.5306	4.40412	2.19226	3.19549	4.35643	1.0387	3.74006	6.56887	1.87406	7.03775	1.29664	0	2.75435	2.07557	0	2.025	4.91097	NA
chr1:118209304..118209332,-	8.69043	5.0007	7.2269	17.0296	5.7362	7.18568	6.84403	6.26175	7.21233	6.25198	3.22969	3.44498	3.93291	2.90428	3.63546	1.63628	6.21379	3.74813	2.34592	1.94496	0	3.23337	6.2267	8.34218	7.29	5.09985	NA
chr1:118238126..118238138,-	117.031	149.727	119.341	69.2482	58.9554	89.5447	102.172	96.9081	131.012	135.379	176.752	165.046	195.417	205.914	212.934	148.901	145.048	331.709	342.973	295.634	112.254	150.172	159.819	175.186	123.525	134.674	NA
chr1:118238142..118238143,-	4.82802	5.58902	7.03157	2.50198	0.956033	4.14559	3.66644	4.1745	8.6828	6.25198	5.87216	7.51632	4.67034	4.64685	6.23222	1.87003	3.55074	0	1.87673	1.29664	0	7.0655	8.30226	4.17109	2.43	3.3999	NA
chr1:118238345..118238368,-	4.24865	14.7079	4.29707	16.0611	9.87901	12.7131	11.2438	16.1017	18.7661	21.401	9.39545	12.214	4.17872	5.22771	4.15481	1.63628	2.84059	1.87406	1.40755	7.77984	0	6.46673	2.07557	0	2.43	12.0885	NA
chr1:118238381..118238391,-	0.772483	1.76495	1.17193	3.14765	0.637355	2.76372	0.24443	1.49089	1.61052	2.64507	0.880823	0.62636	1.47484	0.580857	0	0.467507	0.355074	0	0	1.94496	0	0.718526	0	0	0	0.56665	NA
chr1:118238391..118238419,+	6.95234	5.88318	8.78947	8.39373	7.64827	8.29117	8.06618	6.26175	13.0242	13.2253	5.57855	7.20314	4.42453	7.84157	6.75157	3.0388	10.1196	0	5.16102	5.83488	0	6.82599	4.15113	19.4651	8.1	4.5332	NA
chr1:118276583..118276592,+	0	0	0.195321	3.14765	1.91207	2.76372	2.93316	2.98179	3.15102	3.12599	4.40412	4.38452	3.19549	1.74257	0	0.701261	0.887685	0	1.87673	2.59328	0	3.59263	0	2.78073	1.215	0.755533	NA
chr1:118276598..118276651,+	27.4231	17.3554	22.6573	93.2995	54.1752	79.5953	78.7064	89.1554	105.034	76.2261	68.9978	53.5538	40.804	43.5643	37.9127	39.2706	33.0219	29.985	34.7196	42.1408	30.6147	72.6908	64.3425	82.0314	59.535	28.8991	NA
chr1:118321888..118321891,-	117.031	72.0689	68.5578	33.4942	19.4393	23.4917	17.5989	15.5053	19.7464	37.5119	50.5005	37.2684	71.0383	76.0922	92.4446	46.9845	39.0581	56.2219	93.8367	223.022	198.995	21.5558	18.6801	95.9351	102.06	323.557	NA
chr1:118326141..118326200,+	100.423	87.6594	95.5122	25.2619	18.1646	26.5318	21.021	19.978	25.2782	30.0576	19.6717	30.0653	24.3349	25.2673	42.0675	17.064	23.6124	35.6072	49.7335	51.2173	0	12.4544	26.9823	12.5133	9.71999	104.452	NA
chr1:118326219..118326228,+	4.44177	5.0007	6.44561	0.564962	1.27471	0	0.24443	0.298179	1.47047	0.480922	1.46804	1.25272	0.491614	1.45214	1.0387	0.935015	0.887685	0	0.469184	0	0	0.598771	2.07557	0	0	5.6665	NA
chr1:118326241..118326253,+	6.17986	4.11823	8.2035	1.12992	1.27471	1.38186	0.977719	1.49089	2.31075	2.16415	2.05525	1.5659	1.22904	1.45214	2.59676	1.16877	1.59783	1.87406	1.40755	2.59328	0	1.67656	0	0	1.215	4.91097	NA
chr1:118359246..118359257,-	257.237	224.443	290.052	35.9155	29.9557	46.9833	59.152	73.352	75.0642	179.143	78.9805	103.976	70.7925	71.7358	112.699	62.646	57.6995	43.1034	107.912	94.6548	56.1269	57.1228	80.947	362.885	272.97	101.43	NA
chr1:118359267..118359275,-	73.3858	61.1851	82.2304	11.4607	6.37355	12.4368	14.1769	19.0834	25.4882	20.1987	6.45937	13.7799	9.83229	10.7459	9.34833	4.44132	19.3515	7.49625	15.0139	12.3181	10.2049	9.7001	16.6045	125.133	113.4	22.4771	NA
chr1:118359280..118359287,-	29.3543	22.0619	32.228	6.61813	5.41752	5.25108	5.62188	8.64718	18.626	16.1109	4.69772	8.76904	8.11164	10.165	0.519352	4.44132	7.45655	0	0.938367	0	0	3.23337	4.15113	20.8554	27.945	10.9552	NA
chr1:118367533..118367534,-	0	0	0	0	0.318678	0	0.24443	0.298179	0.0700226	0.480922	1.17443	0.93954	2.94969	0	4.67417	0	0.177537	0	0	5.18656	5.10245	0	0	0	0	0	NA
chr1:118394582..118394586,-	0	0	0	0	0	0	0	0	0	0	0	0	0	0	1.55806	0	0	7.49625	0.938367	0.64832	0	0	0	0	0	0	NA
chr1:118464273..118464323,-	0.772483	0.882477	0.390643	1.93701	0.318678	1.65823	0.733289	0.298179	2.94095	1.2023	0.587216	0.93954	0.737422	1.16171	0	0.233754	0.887685	0	0	0	0	0.479017	0	0	0	1.88883	NA
chr1:1189141..1189150,-	0	0	0	3.14765	2.23074	2.21098	0.488859	0	0.560181	0.721382	0.587216	1.5659	0	1.74257	0.519352	0.233754	0.177537	1.87406	0.469184	0	0	2.75435	0	0	0	0	NA
chr1:1189152..1189168,-	0.965603	0	0.195321	11.7028	4.46149	4.69833	1.95544	2.08725	3.50113	3.36645	3.8169	2.81862	1.47484	1.74257	3.11611	1.40252	1.06522	0	0.469184	0.64832	0	4.90993	2.07557	0	0	0	NA
chr1:1189190..1189223,-	0.965603	0.294159	0.390643	47.699	17.5273	16.0296	9.53276	10.7344	10.3633	8.65659	12.0379	8.76904	6.14518	5.51814	4.15481	2.80504	4.61596	0	2.34592	1.94496	0	14.7298	6.2267	0	0	0.944416	NA
chr1:1189240..1189245,-	0	0	0	3.14765	0.637355	1.93461	0.733289	0.596357	0.700226	0.961843	0.293608	0.93954	0.245807	0	0	0.233754	0.355074	0	0	0	0	0.958034	0	0	0	0	NA
chr1:118981912..118981924,-	0	0	0	0	0	0	0	0	0	0	0	0	0	0.290428	0	2.80504	5.14857	5.62219	7.03775	0.64832	0	0.119754	0	0	0	0	NA
chr1:118982182..118982197,-	0	0	0	0	0	0	0	0	0	0	0	0	0	0	0	0.701261	4.43842	3.74813	7.50694	0	0	0	0	0	0	0	NA
chr1:119036133..119036163,-	8.11107	17.0612	13.6725	1.04922	19.1207	7.46206	7.57732	8.05083	0.700226	1.92369	5.57855	4.07134	2.94969	3.48514	3.63546	7.94762	10.4747	18.7406	4.22265	6.4832	0	5.14943	6.2267	65.3471	39.285	6.04426	NA
chr1:119041177..119041203,-	18.5396	8.23645	12.6959	91.8467	34.7359	43.6668	41.0642	49.4977	80.3159	48.8135	115.681	122.14	379.526	152.184	67.5157	21.7391	25.5653	3.74813	8.91449	71.9635	5.10245	22.7533	8.30226	19.4651	16.605	8.87751	NA
chr1:119041208..119041225,-	15.6428	5.88318	12.3053	37.1261	27.725	34.2702	41.3086	46.2177	38.1623	38.7142	48.4453	50.7352	45.7201	39.2078	47.261	15.194	20.5943	24.3628	29.5586	44.7341	10.2049	35.9263	33.209	13.9036	20.655	9.44416	NA
chr1:119041226..119041250,-	4.6349	5.0007	4.49239	19.693	7.32959	9.12029	10.7549	14.9089	27.2388	13.2253	5.87216	11.2745	14.011	6.97028	3.63546	5.37633	8.87685	0	2.34592	1.29664	0	6.46673	10.3778	2.78073	5.67	6.61091	NA
chr1:119095619..119095630,-	3.66929	7.05981	6.25029	6.05317	3.18678	2.76372	3.42202	2.98179	5.95192	4.08783	4.11051	2.50544	4.91614	3.77557	2.59676	7.48012	7.45655	9.37031	9.85285	6.4832	10.2049	2.51484	2.07557	9.73254	9.71999	9.63305	NA
chr1:119106726..119106747,+	0	0	0	0	0	0	0	0	0	0	1.76165	3.44498	0.983229	1.45214	1.55806	5.14258	11.7174	99.3253	202.687	0.64832	0	0	0	0	0	0	NA
chr1:119192290..119192292,-	0.386241	0	0	0	0	0	0	0	0	0.240461	0.587216	0.93954	0	0	0.519352	0.935015	0.710148	0	0.469184	0	0	2.15558	2.07557	0	0	0	NA
chr1:119246551..119246554,-	0	0.294159	0	0	0.318678	0	0	0	0.0700226	0.240461	0	0.93954	0.245807	0.871285	0.519352	0.935015	0.887685	0	2.34592	0	0	1.67656	0	0	0	0	NA
chr1:119376919..119376931,-	1.93121	2.64743	0.976607	0.161418	0.318678	0	0.24443	0.596357	0.630203	0	0.587216	3.1318	1.22904	2.61386	2.07741	5.37633	12.25	20.6147	13.1371	1.94496	0	8.26305	10.3778	0	0	0	late
chr1:119465261..119465263,+	0	0	0	0	0	0	0	0	0	0	0	0	0	0	1.55806	0.233754	0	0	0.938367	20.7462	0	0	0	0	0	0	extraembryonic
chr1:119516837..119516839,-	0.579362	0.294159	0.195321	0.161418	1.59339	0.276372	1.46658	0.298179	0.210068	0.961843	0.880823	1.5659	0.491614	0.580857	4.15481	0.701261	0.532611	0	7.03775	13.6147	0	1.19754	0	0	0	0.188883	NA
chr1:119554406..119554411,+	0	0	0	0	0	0	0	0	0	0	0	0.31318	0.737422	0	1.0387	0	0	0	0	19.4496	0	0	0	0	0	0	extraembryonic
chr1:119730224..119730232,+	0.579362	0	0.781286	2.25985	0.318678	1.10549	0.488859	1.49089	2.38077	1.44276	2.05525	0.93954	0.491614	0.580857	1.55806	1.16877	1.59783	0	0	0	0	2.03582	0	0	0.405	0.56665	NA
chr1:119730295..119730333,+	30.8993	32.0633	34.5719	26.5532	4.78017	6.63294	9.77719	10.7344	21.4969	23.5652	19.6717	21.6094	22.1226	17.1353	26.4869	19.8691	27.5182	37.4813	49.7335	32.416	35.7171	29.9386	33.209	38.9302	30.375	127.874	NA
chr1:119730336..119730341,+	0.772483	0.882477	0.781286	0.403545	0	0	0.24443	0.298179	0.420135	0.480922	0.587216	0.93954	1.47484	0.871285	0.519352	1.63628	0.887685	0	3.75347	1.94496	0	0.83828	2.07557	0	0.405	7.17756	NA
chr1:119730347..119730356,+	0.386241	0.294159	1.17193	0.807089	0	0	0.24443	0.298179	0.840271	0.961843	1.46804	1.5659	0.737422	0.580857	1.0387	1.40252	1.59783	3.74813	0.938367	1.94496	0	1.3173	2.07557	0	0	8.49975	NA
chr1:119753320..119753327,+	0	0	0	0	0	0	0	0	0	0	0	0.62636	0.245807	0.580857	0.519352	1.63628	1.06522	0	0	1.29664	0	0.239509	0	1.39036	0.81	11.333	Mesenchymal
chr1:119753328..119753339,+	0	0	0	0	0	0	0	0	0	0	0.587216	0.31318	0.737422	0	2.59676	1.40252	1.4203	3.74813	2.8151	0.64832	0	0	0	2.78073	2.835	26.2548	Mesenchymal
chr1:119753346..119753357,+	0	0	0	0	0	0	0	0	0	0	0.293608	0.31318	0.983229	0.290428	0	0.935015	0.532611	0	0	0.64832	0	0	0	0	0.81	17.1884	Mesenchymal
chr1:119833664..119833670,+	6.75922	1.17664	0.390643	14.3662	5.7362	6.35657	9.53276	9.8399	28.8493	6.01152	5.87216	0.31318	0	2.61386	1.55806	2.10378	3.90581	0	0	0.64832	0	1.55681	0	16.6844	2.43	2.83325	NA
chr1:1198480..1198493,+	0	0.588318	0	12.4292	1.27471	3.86921	2.4443	2.38543	7.70248	11.5421	22.6078	19.4172	28.7594	33.9801	45.1836	114.306	178.78	80.5847	26.2743	112.159	5.10245	38.2016	33.209	0	0	0	NA
chr1:119856424..119856431,+	0	0	0	1.29134	0	0.276372	0.24443	0.298179	0.350113	0.721382	0.587216	0.31318	0.491614	0.580857	0	0.467507	0.355074	0	0.469184	0	0	0.718526	0	11.1229	8.505	0	NA
chr1:119856440..119856451,+	0.193121	0.294159	0	4.43899	3.50545	1.38186	1.71101	0.596357	0.770248	2.88553	1.76165	1.87908	0.737422	0.290428	1.0387	2.80504	2.48552	14.9925	8.4453	0.64832	0	1.07779	0	22.2458	21.06	0	NA
chr1:119908054..119908091,+	0	0	0	0.161418	0	0	0	0	0.0700226	0.240461	0	0	0.737422	0.580857	2.59676	8.88264	13.6703	26.2369	29.0894	0	0	0.239509	0	0	0.405	0	NA
chr1:119942831..119942851,+	9.46291	7.05981	8.2035	38.9017	14.6592	21.5571	16.6212	17.5925	24.858	27.4125	16.7356	17.8513	25.3181	15.3927	10.387	7.71387	8.52177	3.74813	7.97612	12.3181	25.5122	7.42477	10.3778	22.2458	24.705	11.7108	NA
chr1:119942863..119942870,+	0.386241	0.588318	0.195321	1.45276	0.956033	0.829117	0	0	1.33043	1.2023	0.587216	0.93954	0.737422	0.580857	0	0.467507	0	0	0.469184	0	0	0.119754	0	0	0.405	0.188883	NA
chr1:119980810..119980815,+	0.386241	0.882477	1.56257	2.09843	0.318678	3.0401	1.46658	2.08725	1.82059	0.240461	0.587216	2.50544	0.737422	0.871285	0.519352	0.467507	1.06522	0	0.469184	2.59328	0	0.479017	2.07557	1.39036	0	2.07772	NA
chr1:119980833..119980920,+	56.7775	30.5925	65.4327	118.723	58.6367	80.7008	74.0622	79.3155	98.3817	87.2873	63.4193	87.0641	41.0498	63.6038	65.9577	42.3094	66.9314	31.8591	45.98	86.8749	10.2049	38.9201	78.8715	26.4169	42.12	178.872	NA
chr1:120012348..120012351,+	0.386241	0	0.976607	1.53347	1.59339	1.10549	1.71101	1.49089	0.560181	1.68323	1.76165	3.1318	1.96646	2.90428	1.55806	3.27255	1.24276	1.87406	0	3.2416	0	1.91607	2.07557	0	0.81	3.3999	NA
chr1:120133385..120133411,+	18.5396	11.4722	12.6959	0	0	0	0	0.298179	0.560181	0	7.34019	2.19226	2.21226	1.16171	1.0387	2.10378	3.01813	1.87406	2.34592	1.94496	10.2049	1.91607	2.07557	0	0.405	2.64437	NA
chr1:120215443..120215446,+	0	0	0	1.29134	0	1.38186	0.488859	0.596357	0.700226	0.240461	0.293608	3.1318	1.72065	0.580857	2.07741	0.701261	0.710148	1.87406	2.34592	1.29664	0	0	0	0	0	0	NA
chr1:120300299..120300337,-	53.8807	32.9458	39.8456	87.892	53.5379	80.4244	89.9501	107.344	137.594	130.33	78.0997	78.9214	58.0105	40.9504	29.603	25.2454	43.8516	26.2369	31.9045	32.416	0	47.5424	45.6624	179.357	193.185	25.6881	NA
chr1:120300492..120300495,-	1.73809	0.882477	0.976607	2.01772	2.23074	2.76372	1.71101	2.08725	1.89061	3.12599	1.17443	1.87908	0.737422	0.290428	0.519352	0.467507	0.710148	0	0.469184	1.29664	0	1.07779	2.07557	0	0.81	0.188883	NA
chr1:1203621..1203624,+	0	0	0	0	0	0	0	0	0	0	0	0	0	0	0	0	0.355074	0	0	0	0	0	0	0	0	0	NA
chr1:120362513..120362522,+	0	0	0	0.807089	0.318678	0.552745	0.488859	0.298179	0.560181	0.721382	0.293608	0.31318	0.491614	0.290428	2.07741	2.10378	3.90581	0	4.22265	0	0	0.359263	2.07557	1.39036	0	0	NA
chr1:120418758..120418770,+	3.47617	5.0007	4.10175	1.37205	0.637355	0.276372	0.733289	1.19271	1.61052	1.68323	2.34886	0.31318	2.45807	1.74257	1.0387	1.63628	2.48552	3.74813	2.34592	0.64832	0	0.958034	0	2.78073	4.05	7.74421	NA
chr1:120664461..120664490,+	2.51057	2.35327	2.53918	8.07089	7.64827	8.29117	8.79947	17.5925	28.4992	44.0043	27.0119	36.0157	22.6143	19.4587	15.0612	11.6877	11.895	5.62219	9.38367	16.208	5.10245	27.0645	22.8312	2.78073	4.455	3.02213	NA
chr1:120775895..120775908,-	2.70369	5.58902	5.66432	2.58269	0.956033	0.276372	0.24443	0.596357	0.560181	1.2023	0.293608	0.93954	1.47484	1.45214	2.59676	0	3.90581	0	1.40755	0.64832	0	0.119754	0	1.39036	2.025	5.28873	NA
chr1:120946945..120946947,-	0	0	0	0	0	0.276372	0.488859	0.298179	0.210068	0.480922	1.46804	0.93954	0.737422	0.580857	0	3.74006	0.532611	0	0.938367	0	0	2.63459	2.07557	0	0	0	NA
chr1:120965016..120965017,-	0	0	0	0	0	0	0	0	0	0	0	0	0	0	0	0	0	0	0	0	0	0	0	0	0	0	NA
chr1:121021491..121021492,-	0	0	0	0.242127	0	0.276372	1.46658	0.298179	0.630203	1.44276	2.93608	0.93954	0.983229	2.61386	2.59676	5.37633	2.30798	0	0.469184	0	0	3.95189	0	0	0	0	NA
chr1:121034302..121034304,-	0	0.294159	0	0	0	0	0	0.298179	0	0.240461	0.293608	2.19226	1.22904	0.871285	0.519352	0.467507	0.355074	0	0.469184	0	0	1.67656	0	0	0	0	NA
chr1:121046105..121046107,-	0	0	0	0	0	0	0.24443	0.298179	0.28009	0.480922	0	0	0.245807	0	0	0.233754	0.532611	0	0	2.59328	0	1.43705	0	0	0	0	NA
chr1:121069629..121069631,-	0	0	0	0.0807089	0	0.276372	0.24443	0.298179	0.210068	0.721382	0.293608	0.62636	0	0.871285	1.0387	3.0388	1.4203	0	0.469184	0	0	0.83828	4.15113	0	0	0	NA
chr1:121082218..121082228,-	0	0	0	0.0807089	0	0	0.488859	0.298179	0.210068	0.480922	0.880823	1.5659	0.491614	1.16171	0.519352	2.57129	0.887685	3.74813	1.40755	0.64832	0	3.35312	0	0	0	0	NA
chr1:121182769..121182772,-	0	0	0.195321	0.0807089	0	0.276372	0.488859	0	0.210068	0.721382	1.17443	0.31318	0	0	0	1.87003	0.710148	0	0	0	0	3.23337	0	0	0	0	NA
chr1:121193059..121193070,-	0.386241	0.588318	0.781286	0.807089	0	0.552745	1.46658	2.68361	3.99129	3.84737	1.46804	1.87908	1.47484	2.033	2.07741	5.61009	6.92394	1.87406	2.8151	0	0	3.95189	6.2267	0	0	0	NA
chr1:121348967..121348972,+	0.386241	0.588318	0.781286	0.0807089	0.637355	2.48735	1.95544	2.38543	0	0.721382	2.34886	2.50544	1.22904	1.45214	1.55806	1.63628	0	7.49625	0.938367	12.3181	0	1.3173	8.30226	1.39036	1.215	0	NA
chr1:121375648..121375659,-	0	0	0.195321	0.322836	0.318678	0.276372	0.488859	1.49089	2.24072	1.68323	4.69772	5.01088	10.3239	5.22771	2.59676	2.33754	7.45655	0	6.56857	0.64832	0	1.79631	0	4.17109	2.835	0	NA
chr1:121402920..121402947,+	11.5872	4.70654	8.00818	9.44294	7.32959	9.94941	7.33289	8.05083	8.61278	6.01152	7.92741	11.5877	13.5194	6.97028	12.4644	8.18138	16.1559	5.62219	5.6302	11.0214	0	16.6458	20.7557	5.56145	2.835	2.07772	NA
chr1:121434071..121434106,-	8.88355	6.76566	10.938	131.475	57.6807	55.2745	38.8643	35.4833	45.3746	38.2333	24.0758	20.3567	18.9272	21.7821	18.6967	14.9602	22.5472	14.9925	15.9522	33.0643	20.4098	31.6151	37.3602	18.0747	15.39	11.5219	NA
chr1:121434110..121434115,-	0.772483	0.882477	0.390643	7.42522	2.23074	4.14559	1.46658	2.38543	1.89061	2.40461	0.587216	0.93954	0.245807	1.45214	1.55806	0.701261	1.77537	0	0.469184	1.29664	0	0.718526	2.07557	1.39036	0.81	0.755533	NA
chr1:121434121..121434128,-	0.772483	0.294159	0.781286	10.7343	3.82413	2.76372	2.93316	2.68361	3.85124	3.60691	1.17443	1.87908	0.983229	2.033	0.519352	0.467507	0.887685	1.87406	0	0.64832	0	1.91607	4.15113	0	0.81	1.1333	NA
chr1:121498340..121498345,-	0	0	0	0	0	0	0	0	0	0	0	0	0	0	0.519352	0.233754	3.90581	239.88	126.68	0	96.9465	0	0	0	0	0	NA
chr1:121681502..121681522,+	9.26979	25.886	11.524	0.645671	8.92298	9.39666	6.35517	9.8399	0.560181	4.08783	6.75298	3.75816	4.17872	6.38942	6.23222	3.74006	12.25	13.1184	2.8151	3.88992	10.2049	3.59263	10.3778	168.234	44.955	10.7663	NA
chr1:121708..121721,-	19.3121	20.5911	29.6889	14.3662	12.7471	12.9895	14.6658	18.1889	18.556	16.3513	17.3229	15.659	17.2065	22.0726	17.1386	11.9214	11.895	3.74813	8.4453	40.1959	10.2049	9.58034	6.2267	8.34218	10.125	26.8214	NA
chr1:121737683..121737691,-	0	0	0	4.60041	0.318678	1.38186	0.24443	0	0.0700226	0	0	0	0	0	0	0.233754	0	0	0	0	0	0	0	0	0	0	NA
chr1:121850166..121850177,+	1.35184	0.588318	1.36725	2.09843	0.318678	1.65823	0.977719	0.894536	0.560181	1.44276	0.880823	0.93954	0.491614	0.871285	0.519352	1.16877	0.355074	0	1.40755	1.29664	0	3.95189	10.3778	8.34218	2.025	5.28873	NA
chr1:121850200..121850228,+	18.1533	9.11893	19.5321	15.8997	7.64827	8.29117	5.86631	8.05083	9.17296	11.3017	5.57855	15.659	13.5194	13.9406	20.2547	13.5577	12.6051	11.2444	21.5824	14.263	0	22.7533	43.5869	29.1976	12.555	44.0098	NA
chr1:121850256..121850279,+	9.26979	3.23575	7.42222	9.9272	3.50545	3.86921	3.42202	5.06904	6.44208	6.7329	7.34019	9.3954	12.5362	13.6501	8.82898	12.3889	12.0725	1.87406	13.1371	0.64832	0	29.8188	29.0579	4.17109	6.48	18.5106	NA
chr1:121904927..121904953,-	25.685	26.1801	36.1345	228.81	85.0869	100.323	78.9508	63.2139	74.8541	60.5961	54.9047	43.2189	38.8375	30.2046	44.1449	54.4646	42.4313	29.985	57.7096	49.9207	30.6147	56.2845	33.209	50.0531	37.26	33.8101	NA
chr1:121938314..121938322,+	0	0	0	0	0	0	0	0.596357	0.0700226	0.961843	0.880823	0.93954	0.491614	0	0.519352	0	0	5.62219	30.0277	0	214.303	0	0	1.39036	1.62	0	late
chr1:122044990..122044997,+	0	0	0	0	0	0	0	0	0	0	0.293608	0.62636	1.72065	2.033	0	0	0	0	0	0	0	16.6458	4.15113	0	0	0	leg
chr1:122045061..122045095,+	0	0	0	0.242127	0	0	0	0	0.0700226	0	3.22969	4.6977	7.62002	8.132	1.55806	9.11639	2.84059	5.62219	8.91449	1.29664	5.10245	84.786	78.8715	0	0	0	NA
chr1:122045166..122045185,+	0	0	0	0	0	0	0	0	0	0	0	0.62636	2.45807	3.77557	3.11611	2.57129	1.59783	7.49625	1.40755	1.94496	0	40.3572	39.4357	0	0	0	NA
chr1:122045186..122045197,+	0.193121	0	0	0	0	0	0	0	0	0	0	0.31318	1.22904	1.45214	1.0387	0.935015	1.06522	0	2.8151	0	0	18.6817	20.7557	0	0	0	NA
chr1:122045212..122045219,+	0	0	0	0	0	0	0	0	0	0	0	0.31318	0.491614	0.290428	0	0	0.355074	0	0	0	0	11.2569	8.30226	0	0	0	leg
chr1:122045222..122045233,+	0	0	0	0	0	0	0	0	0	0	0	0.31318	1.47484	1.16171	1.55806	0.701261	0.177537	0	0	0	0	18.5619	18.6801	0	0	0	NA
chr1:122045234..122045239,+	0	0	0	0	0	0	0	0	0	0	0	0.31318	0.491614	0	0	0	0	0	0	0	0	3.47287	2.07557	0	0	0	NA
chr1:122045319..122045334,+	0	0	0	0	0	0	0	0	0	0	0.293608	0.62636	1.47484	2.61386	0	0	0.177537	0	0	0	0	17.1249	24.9068	0	0	0	NA
chr1:122047472..122047475,+	0	0	0	0	0	0	0	0	0	0	0	0	0.491614	0.580857	0	0.467507	0.177537	0	0	0	0	3.71238	2.07557	0	0	0	NA
chr1:122087366..122087408,+	5.21426	1.47079	3.51579	16.1418	2.8681	6.63294	2.68873	5.06904	7.98257	3.36645	4.40412	3.44498	5.40776	4.35643	1.55806	1.63628	4.61596	0	2.34592	1.94496	5.10245	11.8557	10.3778	1.39036	2.025	4.91097	NA
chr1:122087482..122087490,+	0	0	0	2.42127	0.637355	0.276372	0.24443	0.894536	1.12036	0.721382	0	0	0.245807	0.290428	0	0	0.177537	0	0	0	0	0.239509	0	1.39036	0.81	0	NA
chr1:122094738..122094741,+	0.193121	0	0.390643	0.161418	0	0.829117	0.977719	0	0.210068	0.480922	0.293608	0	0.491614	0	0	1.16877	0	0	0.469184	2.59328	0	1.55681	6.2267	0	0.405	0.56665	NA
chr1:122126000..122126037,+	6.95234	2.35327	3.32047	7.66735	7.32959	5.80382	4.1553	5.36722	6.02194	4.56876	10.2763	9.70858	5.65357	8.71285	5.19352	6.0776	9.94207	7.49625	5.16102	5.83488	0	21.1965	16.6045	19.4651	35.235	8.31086	NA
chr1:122126082..122126093,+	0.579362	0.294159	0	1.12992	1.91207	1.10549	0.977719	1.49089	1.40045	1.44276	2.34886	1.87908	1.96646	1.16171	2.07741	1.16877	0.710148	0	0	1.94496	0	5.14943	2.07557	8.34218	3.645	0	NA
chr1:122126109..122126123,+	2.31745	0.588318	1.36725	5.97246	1.27471	2.21098	1.22215	3.57814	6.02194	4.32829	7.34019	5.63724	5.40776	7.26071	5.19352	5.84384	6.39133	5.62219	6.09939	5.18656	0	31.6151	26.9823	80.6411	56.295	0.56665	NA
chr1:122126766..122126768,+	1.35184	0	0	0	0	0.552745	0	0	0.140045	0.240461	0	0.62636	0.983229	0.871285	0	0.935015	0.887685	0	0	0.64832	0	2.03582	2.07557	2.78073	0.405	0.755533	NA
chr1:122344540..122344578,-	36.1136	26.1801	45.5099	64.6478	33.4612	35.3757	30.7981	31.3088	46.495	49.054	87.7887	79.5477	81.3622	81.32	78.4221	13.0902	23.2573	41.2294	24.8667	71.9635	35.7171	15.5681	16.6045	40.3205	27.945	24.5548	NA
chr1:122344579..122344594,-	5.40738	5.58902	4.49239	13.7205	4.46149	6.35657	6.35517	4.1745	9.87318	7.21382	5.57855	6.2636	11.0613	4.64685	5.71287	3.27255	6.39133	1.87406	5.6302	13.6147	5.10245	2.8741	2.07557	2.78073	6.48	4.34432	NA
chr1:122344720..122344744,+	2.70369	2.05911	0.390643	8.31302	4.14281	5.25108	4.64416	5.06904	4.62149	3.84737	3.52329	6.57678	1.96646	2.033	1.55806	2.10378	3.3732	1.87406	0.469184	5.18656	0	4.43091	2.07557	0	0.405	1.32218	NA
chr1:122363041..122363058,+	0	0	0	0	0	0	0	1.19271	1.61052	11.3017	86.0271	53.2406	62.435	196.039	78.4221	0	0.177537	0	0	32.416	5.10245	0	0	0	0	0	NA
chr1:122516995..122517001,-	0	0	0	0	0	0	0	0	0	0	0	0	0	0	0.519352	3.27255	3.55074	5.62219	11.7296	0	0	0	0	0	0	0	late
chr1:122783276..122783315,+	12.5528	5.88318	11.524	21.3072	14.0218	21.0043	16.3768	22.3634	16.5253	15.63	14.6804	14.7195	10.8155	5.80857	12.9838	6.31135	7.98916	14.9925	13.1371	29.8227	10.2049	17.1249	12.4534	26.4169	14.985	14.544	NA
chr1:122827127..122827169,+	13.1322	17.0612	7.2269	4.84253	3.50545	4.69833	5.37745	8.05083	10.5734	5.77106	5.57855	12.5272	20.8936	27.0098	57.648	93.034	144.338	89.955	165.622	18.153	168.381	14.8495	20.7557	1.39036	0.405	26.6325	NA
chr1:122903283..122903291,+	0	0	0	0	0	0	0.24443	0	0.140045	0.480922	0	0.93954	0.737422	0.580857	4.15481	13.0902	11.895	13.1184	20.1749	0	0	0	0	0	0	0	late
chr1:122903368..122903390,+	0	0	0	0	0	0.276372	0	0	0.0700226	0	0	0.31318	0.491614	1.16171	0.519352	6.31135	7.45655	5.62219	14.0755	0	0	0.119754	0	0	0	0	late
chr1:122915058..122915061,+	0	0	0	0	0	0.276372	0.24443	0	0	0.240461	0	0.31318	0.737422	0	0.519352	3.27255	0.710148	0	0.938367	0	0	0.83828	0	0	0	0.188883	NA
chr1:122963829..122963867,+	63.5367	67.0682	71.2923	46.2462	30.9117	45.0487	38.8643	40.2541	40.403	35.3477	46.39	44.7848	35.642	38.3365	52.9739	40.4394	60.3626	41.2294	60.9939	44.0858	66.3318	61.1944	56.0403	84.8122	70.065	43.632	NA
chr1:122978750..122978803,-	51.9495	43.5355	52.9321	61.9844	27.4063	26.8081	26.8873	30.7124	45.3046	35.1073	34.9393	30.6917	21.631	26.1386	16.0999	21.0378	33.732	11.2444	22.0516	11.0214	20.4098	19.8792	12.4534	44.4916	42.93	44.1987	NA
chr1:122978813..122978824,-	2.89681	1.47079	4.68772	2.90552	1.91207	2.21098	3.17759	3.27997	3.43111	3.60691	1.76165	1.5659	1.72065	4.35643	1.55806	0.935015	1.4203	0	4.69184	0.64832	0	1.55681	2.07557	8.34218	5.265	4.91097	NA
chr1:122993253..122993279,-	13.1322	11.7664	18.1649	1.69489	0.637355	2.76372	2.4443	3.27997	3.99129	2.40461	4.40412	3.44498	6.8826	5.22771	8.30963	5.14258	8.87685	5.62219	7.50694	7.13152	0	3.59263	2.07557	25.0265	17.415	8.49975	NA
chr1:123059012..123059026,-	1.73809	3.52991	2.92982	0.0807089	0	0	0	0	0.700226	1.44276	1.17443	0.62636	0.737422	1.45214	9.86768	43.0107	134.751	13.1184	8.91449	5.83488	0	0.239509	0	1.39036	0.405	2.07772	NA
chr1:123059049..123059062,-	0	3.23575	2.14854	0.322836	0	0.276372	0.24443	0.298179	0.980316	1.2023	0.587216	0.93954	0.491614	0.290428	1.55806	18.2328	39.5907	3.74813	0.938367	1.29664	0	0.239509	0	0	0	1.1333	NA
chr1:123286357..123286375,+	256.464	294.747	348.649	0	0	0	0	0	0	0	0	0	0	0	0.519352	0	0.177537	0	0.469184	0	5.10245	0	0	0	0	38.7211	NA
chr1:123358547..123358551,-	31.6718	29.4159	15.0398	10.6536	4.14281	6.63294	7.08846	9.54172	12.534	6.97336	5.87216	4.6977	2.94969	5.80857	0	3.27255	7.27901	1.87406	0.469184	0	0	1.19754	0	2.78073	0.405	24.1771	NA
chr1:123358636..123358651,-	9.65603	5.88318	6.25029	0.0807089	0.637355	1.38186	2.68873	2.38543	0.700226	12.504	3.22969	4.07134	1.47484	4.35643	5.19352	1.63628	0.355074	0	1.87673	3.88992	10.2049	0.598771	2.07557	0	0	6.04426	NA
chr1:123358653..123358662,-	7.91795	3.82407	5.85964	0.242127	0.318678	0.552745	0.977719	0.298179	0.490158	1.68323	1.17443	1.25272	0.737422	1.45214	2.59676	2.80504	0.532611	3.74813	2.34592	1.94496	0	0.83828	4.15113	0	0	5.28873	NA
chr1:123358669..123358701,-	47.5077	18.2379	33.5953	1.04922	3.18678	6.35657	6.5996	1.78907	1.82059	9.85889	4.69772	6.2636	3.93291	10.4554	6.75157	7.94762	2.30798	18.7406	6.56857	9.7248	5.10245	3.71238	2.07557	0	0.81	30.4102	NA
chr1:123358760..123358780,-	15.8359	11.178	17.3836	0.887798	0.637355	1.38186	2.4443	1.78907	0.910293	2.88553	1.76165	3.44498	1.72065	3.77557	2.07741	4.20757	0.532611	0	1.40755	1.29664	0	2.03582	0	0	0.81	11.5219	NA
chr1:123358916..123358970,-	89.8011	66.7741	77.9333	5.16537	5.41752	10.7785	12.7103	11.629	5.18167	8.65659	12.6251	14.7195	11.0613	16.5544	8.82898	20.5703	7.63409	3.74813	7.50694	8.42816	15.3073	6.82599	4.15113	1.39036	2.835	54.7761	NA
chr1:123358940..123358969,+	24.7194	8.23645	9.57075	0.72638	1.27471	3.0401	2.19987	1.78907	0.770248	2.16415	7.92741	2.50544	5.40776	7.26071	7.79028	13.7915	2.30798	3.74813	1.87673	4.53824	0	4.1914	4.15113	1.39036	0.81	14.1662	NA
chr1:123358972..123358973,-	2.12433	0.882477	0.781286	0.0807089	0	0	0.488859	0.596357	0.140045	0	0.880823	0	0	0	1.0387	0.701261	0	0	0	0	0	0.119754	0	0	0	0.56665	NA
chr1:123359114..123359125,-	4.44177	2.05911	6.44561	0	0.318678	0	0	0	0	0.240461	0	0	0.245807	0.290428	1.0387	2.33754	1.24276	0	0.938367	1.29664	0	0.239509	0	0	0.405	3.58878	NA
chr1:123359285..123359299,+	50.7907	28.5334	27.7357	3.30907	2.54942	5.25108	6.84403	1.78907	3.7112	1.68323	4.99133	6.2636	5.65357	8.132	9.34833	10.5189	7.98916	5.62219	4.69184	9.07648	0	3.95189	0	1.39036	0.81	38.1544	NA
chr1:123359355..123359393,-	40.5553	31.1808	38.283	3.95474	5.09884	12.1604	10.266	9.24354	4.76154	7.21382	10.8635	9.08222	6.14518	11.9076	2.59676	20.1028	4.43842	5.62219	5.16102	1.94496	0	5.02968	8.30226	0	1.215	28.8991	NA
chr1:123360105..123360115,-	9991.29	10410.3	12368.5	2330.71	2464.65	3276.67	3990.8	4086.24	3058.03	3076.21	3264.92	3386.42	2180.8	3183.1	3632.35	5301.53	2516.05	3169.04	2754.58	4092.2	1214.38	2170.07	2067.26	603.418	437.805	9652.88	NA
chr1:123361040..123361050,-	6.5661	4.11823	5.85964	0.161418	0	0.552745	0.24443	0.298179	0.140045	0.240461	0	0.31318	0.245807	0.580857	0	1.63628	1.4203	1.87406	0	0.64832	5.10245	0.359263	0	0	0	2.45548	NA
chr1:123414298..123414303,-	0	0	0	0	0	0	0	0.298179	0.0700226	0	0	0	0	0	0	0	0.532611	0	0.469184	0	0	0	0	0	0	3.77767	NA
chr1:123414334..123414345,-	0	0	0	0	0	0	0	0	0	0	0	0	0.491614	0	0	0.467507	0.355074	0	0.469184	0	0	0.119754	0	0	0	16.4328	Mesenchymal
chr1:123414361..123414368,-	0	0	0	0	0	0	0	0	0	0	0	0	0	0	0	0	0	0	0	0	0	0	0	0	0.405	6.23315	NA
chr1:123414371..123414383,-	0	0	0	0	0	0	0	0	0	0	0	0	0	0.580857	0	0.233754	0.177537	0	0	0.64832	0	0.119754	0	0	0	16.0551	Mesenchymal
chr1:123414393..123414398,-	0	0	0.195321	0	0	0	0	0	0	0	0	0	0.245807	0.290428	0	0	0.355074	0	0	0	0	0	0	0	0	8.68863	NA
chr1:123428073..123428087,-	0	0	0	0	0	0	0	0	0	0	0.293608	0	0.245807	0.580857	0	0	0.355074	1.87406	0.938367	0	0	0	0	9.73254	11.34	0	hepatocytes
chr1:123444691..123444705,-	1.35184	0.294159	0.976607	4.5197	0.956033	4.69833	3.66644	2.98179	7.21233	8.41613	18.2037	9.70858	48.424	58.0857	24.4095	52.8283	53.7937	20.6147	41.7573	46.0307	0	0.479017	0	2262.12	2244.1	1.1333	hepatocytes
chr1:12373334..12373340,+	0.386241	0.294159	0.585964	0.564962	0.637355	0.276372	0.488859	0	1.40045	0.240461	0.293608	0.31318	0.491614	0	0	0.467507	0.177537	1.87406	0	0	0	0.479017	0	0	0	0.944416	NA
chr1:123759117..123759118,+	0	0	0	0	0	0	0	0	0	0	0	0	0	0	0	0	0	0	8.91449	0	0	0	0	0	0	0	NA
chr1:123842071..123842078,+	0.193121	0.294159	0	0.161418	0	0	0.24443	0	0	0	0.293608	0	0	0.290428	0	0	0	0	0	0	0	0.359263	0	2.78073	0	0.944416	NA
chr1:123842102..123842115,+	10.4285	7.05981	9.76607	0.645671	1.59339	3.0401	2.19987	1.49089	0.980316	0.721382	3.8169	5.32406	6.14518	6.67985	11.9451	5.14258	0.887685	20.6147	10.322	7.13152	5.10245	5.38894	0	2.78073	4.05	6.42203	NA
chr1:123842134..123842146,+	8.30419	7.94229	5.66432	1.61418	0.956033	3.0401	2.93316	1.19271	1.33043	1.92369	4.99133	8.14268	5.65357	13.0693	8.30963	6.0776	2.66305	14.9925	16.4214	12.9664	10.2049	4.55066	6.2267	4.17109	5.265	9.25528	NA
chr1:123988143..123988157,-	0.579362	0.588318	0.781286	7.82876	2.23074	1.38186	0.733289	0.298179	2.03065	0.961843	1.17443	1.87908	0.737422	1.74257	1.0387	2.10378	1.59783	3.74813	0.938367	1.94496	0	1.67656	0	2.78073	1.62	0.755533	NA
chr1:123988206..123988226,-	11.201	11.178	13.6725	33.0907	16.5712	22.9389	13.9325	19.978	22.8274	16.8323	23.195	15.9722	16.4691	15.9736	21.2934	22.6741	19.5291	16.8666	16.4214	25.9328	10.2049	16.2866	10.3778	22.2458	16.605	17.5661	NA
chr1:123988231..123988240,-	1.15872	0.882477	1.95321	4.84253	1.59339	0.276372	0.977719	1.49089	4.20135	0.721382	0.880823	0.93954	0.983229	0	0.519352	1.63628	1.77537	0	0	0	5.10245	2.75435	0	6.95182	2.025	1.51107	NA
chr1:124019359..124019370,-	3.47617	2.94159	2.34386	2.98623	1.27471	1.65823	1.95544	0.894536	3.78122	1.2023	0.880823	2.19226	1.72065	1.45214	1.0387	0.701261	2.48552	0	0	0.64832	0	1.3173	2.07557	2.78073	4.455	2.83325	NA
chr1:124019373..124019406,-	10.8148	13.2372	9.76607	13.6398	9.56033	14.9241	9.28833	12.5235	22.8974	15.3895	8.51463	11.2745	5.89937	11.3267	5.71287	3.97381	12.25	0	6.09939	6.4832	0	4.43091	4.15113	6.95182	16.605	4.72208	NA
chr1:124026388..124026390,-	2.31745	1.47079	1.36725	3.71261	0.637355	2.76372	1.71101	2.38543	3.08099	0.961843	2.34886	0.93954	1.96646	0.580857	0	0.233754	0.887685	0	0	0	5.10245	1.07779	0	0	0	0.755533	NA
chr1:124175060..124175078,+	0.579362	1.17664	0	1.04922	0.318678	0.829117	0.977719	2.38543	3.50113	2.88553	1.76165	0.93954	0.737422	0.580857	0.519352	1.16877	0.532611	0	0	1.29664	0	0.119754	0	0	0	0.755533	NA
chr1:124589656..124589676,+	12.9391	2.05911	16.993	6.376	4.46149	2.48735	4.64416	3.57814	5.25169	2.16415	4.69772	1.87908	3.68711	3.19471	5.19352	10.2852	6.7464	5.62219	1.40755	0.64832	0	2.99386	8.30226	0	0	14.3551	NA
chr1:124589682..124589691,+	0.965603	0	1.56257	1.29134	0.956033	0.829117	0.24443	1.19271	0.630203	0.480922	0.293608	0	0.245807	0	0	1.16877	0.355074	0	0	0	0	1.91607	2.07557	0	0	1.1333	NA
chr1:124589703..124589723,+	10.4285	3.23575	8.00818	5.89175	1.59339	3.31647	2.4443	2.98179	4.41142	1.44276	1.46804	0.62636	2.45807	2.61386	2.07741	5.61009	6.21379	0	0.469184	0.64832	0	5.5087	6.2267	0	0	7.36645	NA
chr1:124589776..124589780,+	4.24865	0.294159	3.32047	2.7441	0.318678	1.65823	0.488859	0.894536	2.45079	1.2023	1.17443	0.93954	1.47484	2.32343	1.55806	3.97381	2.84059	0	0.938367	1.29664	0	1.55681	2.07557	0	0	5.85538	NA
chr1:12485947..12485950,-	0	0	0	0	0	0	0	0	0	0	0	0	0	0	11.9451	0	0	71.2144	1.87673	0	0	0	0	0	0	0	NA
chr1:124862738..124862786,-	11.7804	17.6495	14.2585	1.53347	0	0.829117	0.24443	1.49089	1.05034	0.961843	1.17443	1.5659	1.72065	3.19471	4.15481	13.7915	19.8841	16.8666	15.9522	0.64832	0	2.03582	2.07557	0	0.81	5.47761	NA
chr1:124950071..124950072,-	0.193121	0.294159	0.195321	0.887798	0.637355	0.552745	0.977719	0.298179	0.0700226	0	1.76165	0	0	0	0.519352	0.935015	0.177537	0	0	0.64832	0	0.359263	0	0	0	0.56665	NA
chr1:12504024..12504033,-	2.51057	1.47079	0.976607	4.76183	0.318678	1.10549	0.977719	0.298179	0.700226	0.961843	1.17443	0.93954	0.491614	0.871285	0.519352	0.935015	0	0	1.87673	0.64832	0	0.958034	2.07557	0	0	0.755533	NA
chr1:12504046..12504059,-	14.8703	16.4729	19.1415	7.42522	3.18678	1.93461	0.977719	1.49089	3.36108	2.16415	4.11051	2.81862	3.19549	2.61386	3.11611	3.0388	5.68118	5.62219	4.69184	2.59328	0	3.47287	4.15113	1.39036	1.215	9.25528	NA
chr1:12504083..12504091,-	3.47617	2.35327	2.92982	2.82481	1.91207	1.38186	0.977719	2.08725	1.40045	2.16415	1.17443	0.93954	0.737422	1.45214	1.0387	1.63628	1.59783	0	2.34592	2.59328	0	0.718526	0	0	0	1.32218	NA
chr1:12504106..12504121,-	3.08993	3.23575	2.14854	9.28153	3.82413	3.86921	3.17759	2.38543	3.43111	2.16415	1.76165	1.25272	1.22904	1.16171	0	0.701261	2.13044	0	0.469184	0	0	1.19754	4.15113	0	0.405	1.51107	NA
chr1:12504404..12504422,+	4.24865	5.29486	7.03157	5.16537	3.82413	3.86921	2.19987	3.27997	3.85124	2.88553	4.40412	4.6977	5.89937	7.55114	5.71287	3.97381	4.61596	1.87406	5.6302	7.13152	5.10245	3.95189	4.15113	5.56145	6.075	7.74421	NA
chr1:12504428..12504459,+	18.5396	17.6495	16.407	15.0119	7.96694	12.1604	11.7326	11.0326	11.9739	9.37797	10.2763	13.4667	10.8155	9.87457	13.5031	9.5839	7.45655	1.87406	9.38367	14.263	0	11.9754	4.15113	13.9036	10.125	10.5775	NA
chr1:125134190..125134204,-	3.66929	4.41238	2.92982	2.7441	1.27471	0.276372	0.977719	2.38543	4.06131	1.92369	2.93608	4.38452	1.72065	1.45214	2.59676	0.467507	0.532611	0	2.8151	0.64832	0	0.479017	0	1.39036	0.405	2.07772	NA
chr1:125134728..125134735,-	0.193121	0.294159	0	0.484253	0.637355	0.276372	0.733289	0.298179	1.26041	0.961843	0.587216	0	0	0.290428	0	0.467507	0	0	0	0	0	0.718526	2.07557	0	0	0	NA
chr1:125374739..125374790,-	16.029	14.1196	14.2585	5.56892	5.09884	4.9747	9.53276	9.8399	14.5647	7.69475	8.80823	8.14268	5.40776	8.71285	8.82898	4.90883	9.58699	0	2.8151	3.88992	0	9.34083	20.7557	1.39036	2.43	7.17756	NA
chr1:125374967..125374992,-	10.0423	9.11893	12.1099	11.1378	6.69223	9.39666	11.2438	14.0144	16.7354	23.5652	15.8548	19.104	17.6981	15.3927	15.5806	7.24636	10.2971	11.2444	13.1371	18.153	0	10.1791	10.3778	20.8554	8.1	7.9331	NA
chr1:12559912..12559954,-	4.24865	12.3547	10.5474	24.6969	11.1537	8.84392	11.2438	10.7344	14.4247	17.3132	20.8462	15.659	19.4188	21.2013	27.0063	16.5965	15.6233	9.37031	20.1749	35.0093	10.2049	23.5916	18.6801	4.17109	10.935	14.3551	NA
chr1:125617754..125617756,+	0	0	0	0	0	0	0	0	0	0.240461	0.587216	3.1318	9.09487	13.3597	0	0	0	0	0	0	0	0	0	0	0.81	0	NA
chr1:125695621..125695655,+	6.37298	5.88318	1.95321	2.42127	0.956033	1.10549	0	1.19271	0.560181	0.480922	1.76165	2.50544	2.45807	3.19471	5.71287	19.4016	26.9856	1.87406	10.7912	4.53824	0	8.50255	12.4534	0	0	0	NA
chr1:125695673..125695685,+	3.47617	1.47079	0.781286	1.85631	0.318678	0	0	0	0.350113	0	0.587216	1.25272	0.245807	2.32343	1.55806	3.74006	7.98916	1.87406	4.22265	0.64832	0	2.15558	4.15113	0	0	0	NA
chr1:126221086..126221089,+	0	0	0	0	0	0	0	0	0	0	1.17443	2.19226	2.21226	4.64685	5.19352	0.233754	0	0	0	1.29664	0	0.119754	0	0	0	0	NA
chr1:12641987..12641998,-	3.47617	1.76495	2.92982	3.14765	1.27471	1.93461	1.22215	1.19271	3.01097	3.36645	1.17443	0.62636	0.737422	0.580857	2.07741	0.233754	2.48552	1.87406	0.469184	0.64832	0	1.07779	2.07557	1.39036	0.405	4.34432	NA
chr1:12642017..12642042,-	28.3887	37.9465	40.8222	53.1872	28.9997	37.0339	29.3316	40.8505	45.1646	40.157	21.1398	19.104	16.7149	17.4257	22.3321	7.24636	16.3334	11.2444	13.1371	31.7677	10.2049	10.0594	6.2267	25.0265	16.2	37.5878	NA
chr1:126513696..126513710,+	1.93121	4.70654	2.92982	1.53347	1.27471	0.276372	1.22215	0.894536	1.19038	1.92369	1.76165	3.75816	2.45807	2.90428	3.11611	2.10378	1.95291	1.87406	5.16102	2.59328	0	0.958034	0	4.17109	10.125	6.04426	NA
chr1:126513714..126513736,+	8.49731	10.5897	9.37543	7.74806	3.50545	3.86921	2.93316	5.06904	5.18167	4.08783	8.80823	11.2745	9.83229	10.165	7.27092	10.9864	8.1667	3.74813	10.7912	7.13152	15.3073	7.18526	2.07557	30.588	12.96	13.4107	NA
chr1:126513865..126513870,+	0.193121	0	0.195321	7.58664	4.78017	4.69833	5.37745	2.98179	0.630203	4.56876	0.587216	1.5659	0.245807	0.290428	0	0	0	0	0	1.29664	0	0.119754	0	0	0	0	NA
chr1:126513891..126513900,-	2.12433	2.35327	2.14854	0.564962	0.318678	0	0.24443	0	0.350113	0.721382	0.880823	0.62636	0.737422	2.033	4.15481	2.10378	3.55074	9.37031	2.34592	2.59328	0	0.359263	2.07557	13.9036	10.935	1.1333	NA
chr1:12676634..12676645,+	0.965603	1.17664	1.56257	2.58269	0.637355	0.829117	0.24443	2.08725	2.31075	2.64507	1.76165	0.62636	1.47484	0.871285	2.07741	0.701261	1.59783	1.87406	2.8151	3.88992	0	0.83828	4.15113	2.78073	1.215	1.88883	NA
chr1:12676650..12676665,+	5.21426	5.29486	5.27368	2.09843	0.637355	1.38186	2.93316	1.49089	2.94095	5.77106	1.17443	1.5659	1.96646	2.90428	2.59676	2.80504	4.08335	1.87406	5.16102	0.64832	0	2.15558	2.07557	4.17109	4.05	6.04426	NA
chr1:126886648..126886686,+	2.31745	0.294159	2.53918	7.34451	2.54942	3.31647	2.19987	1.19271	0.910293	0.721382	2.05525	2.50544	3.68711	8.71285	24.9289	77.3725	56.9894	88.0809	94.7751	1.94496	0	1.3173	0	0	0	0	NA
chr1:126966347..126966350,+	0	0	0	0.0807089	0	0	0	0	0	0.240461	0	0.62636	0.737422	0.871285	1.0387	5.84384	3.01813	1.87406	2.8151	0	0	0	0	0	0	0.188883	NA
chr1:127362523..127362525,-	0	0	0	0.242127	0	0	0.488859	0.298179	0	0	0.293608	0.93954	1.72065	3.48514	1.55806	0	0	0	0	0	0	0	0	0	0	0	NA
chr1:127377325..127377329,-	0	0	0	0.322836	1.27471	1.38186	0.488859	0	0	0	0.587216	0.93954	1.22904	4.64685	3.11611	0	0	0	0	6.4832	0	0	0	0	0	0	NA
chr1:12776934..12776939,+	0.772483	0.882477	3.51579	0.887798	0	0	0	0	0.0700226	0	0	0	0.491614	0	0	0.467507	1.06522	9.37031	15.0139	0.64832	5.10245	0	0	5.56145	8.505	15.2995	NA
chr1:127810797..127810798,+	0	0	0	1.21063	0.318678	0.829117	0.488859	0	0	0	0	0	0	0	0	0	0	0	0	0	0	0	0	0	0	0	NA
chr1:12797138..12797149,+	3.66929	1.47079	1.36725	2.01772	0.637355	2.76372	0.977719	1.19271	1.33043	1.68323	1.46804	4.07134	1.96646	2.033	3.63546	2.10378	0.532611	1.87406	1.87673	4.53824	5.10245	0.598771	0	0	0	1.88883	NA
chr1:12797190..12797210,+	6.95234	6.4715	6.64093	3.87403	1.27471	0.276372	0.24443	1.19271	2.38077	2.88553	0.293608	3.1318	1.96646	1.74257	1.0387	1.16877	0.887685	1.87406	1.40755	1.94496	5.10245	1.79631	0	2.78073	1.62	6.98868	NA
chr1:128155815..128155888,+	29.5475	26.1801	31.0561	30.0237	10.1977	16.5823	12.4659	8.94536	17.0855	16.8323	9.10184	6.57678	7.37422	4.64685	6.75157	5.61009	15.9783	28.1109	17.3598	14.9114	0	8.62231	10.3778	6.95182	8.91	72.9089	NA
chr1:128155909..128155928,+	1.54497	2.64743	3.32047	6.05317	6.37355	3.59284	1.95544	2.98179	2.66086	2.64507	0.880823	0.93954	1.22904	1.45214	1.55806	1.63628	2.66305	5.62219	4.69184	1.94496	0	2.39509	2.07557	1.39036	1.62	5.6665	NA
chr1:128366010..128366023,+	4.82802	7.35397	4.10175	1.29134	0.318678	0.276372	1.22215	1.19271	0.840271	1.68323	1.17443	2.50544	11.0613	14.8118	18.1773	36.4656	34.7972	18.7406	9.85285	10.3731	0	2.75435	2.07557	0	0	0	NA
chr1:128370042..128370044,+	0.965603	1.47079	0.976607	0.0807089	0.318678	0.276372	0	0	0	0	0.587216	0.93954	1.47484	15.6831	6.75157	23.8429	2.30798	1.87406	3.28428	4.53824	0	2.99386	4.15113	0	0	0	middle_late
chr1:128370855..128370858,+	0.772483	0.294159	0	0	0	0	0	0.298179	0	0	0.293608	0.31318	1.22904	2.033	1.55806	7.24636	4.97103	0	1.87673	1.94496	0	1.19754	2.07557	0	0	0	NA
chr1:128398192..128398196,-	0.193121	7.35397	0.390643	0	0	0	0	0	0	0	0	0	0	0	0	0	0	0	0	0	0	0	0	0	0	0	NA
chr1:128491844..128491889,+	9.26979	18.2379	12.5006	0.484253	0.318678	0.552745	1.22215	1.49089	1.5405	0.240461	1.76165	1.87908	11.5529	20.33	17.658	19.4016	8.34424	18.7406	11.2604	53.8106	0	3.47287	0	0	0.405	0.944416	extraembryonic
chr1:128514168..128514180,+	2.70369	5.29486	6.05497	0.403545	1.59339	0.552745	0.24443	0.596357	0.910293	0.480922	0.587216	0.62636	0.491614	4.066	6.75157	0.233754	0.177537	3.74813	7.97612	16.208	10.2049	0.479017	0	5.56145	8.505	1.88883	NA
chr1:128530814..128530826,+	0	0	0.195321	0	0	0	0	0.298179	0	0.240461	0.587216	0	0	0.871285	1.0387	0.467507	0.177537	1.87406	2.34592	3.2416	0	0	0	29.1976	23.895	0	hepatocytes
chr1:128598304..128598316,-	0	0	0	0	0	0.276372	0	0.298179	0.560181	0.721382	4.11051	11.2745	4.17872	19.4587	35.3159	1.87003	14.558	612.819	48.7951	22.6912	35.7171	0.718526	2.07557	0	0	0	NA
chr1:128604031..128604042,+	0.579362	1.47079	5.07836	0	0	0.276372	0	0.298179	0	0.721382	0.293608	0	0.491614	0.580857	0	0	0.355074	0	0	2.59328	0	0.119754	0	0	0	0	NA
chr1:128604168..128604172,-	13.3253	6.17734	10.5474	0.322836	0.637355	0.829117	0.977719	0.298179	0.560181	0.961843	1.17443	4.38452	5.40776	6.38942	1.55806	1.16877	2.84059	0	0	3.88992	0	0.83828	0	0	0	10.1997	NA
chr1:128627540..128627572,-	421.582	305.043	517.993	33.9785	18.1646	16.0296	14.6658	30.7124	67.9219	43.7639	69.2914	97.0858	90.457	80.4487	101.793	35.9981	67.464	63.7181	45.0416	262.57	102.049	20.957	20.7557	0	0.405	423.854	NA
chr1:128627581..128627601,-	109.306	87.9535	131.647	7.74806	1.91207	3.31647	2.68873	5.96357	12.6041	13.9467	15.8548	21.2962	16.9607	17.7161	28.5643	7.71387	15.6233	1.87406	8.4453	36.3059	20.4098	4.55066	2.07557	0	0.405	109.93	NA
chr1:128627635..128627646,-	15.2565	11.4722	17.9696	1.37205	0.637355	0.829117	0.733289	2.98179	2.8009	3.36645	3.8169	9.70858	7.86583	2.033	11.9451	2.10378	4.61596	1.87406	7.50694	20.0979	15.3073	0.958034	4.15113	0	0	12.0885	NA
chr1:12869650..12869661,+	5.02114	6.17734	4.10175	0	0	0	0	0	0	0	0	0	0.491614	2.61386	5.19352	38.3356	52.5509	58.0959	25.3359	3.88992	0	0.479017	0	0	0	0	NA
chr1:12869677..12869698,+	20.2777	17.3554	11.9146	0	0	0	0	0	0	0	0	0	0.983229	7.84157	34.7966	145.161	164.932	163.043	70.3775	11.6698	0	4.90993	0	0	0	0	NA
chr1:128721276..128721326,+	36.4998	29.4159	36.5251	16.8682	6.69223	10.2258	9.77719	9.24354	14.8448	14.4276	7.34019	13.1536	14.2568	11.0363	11.9451	6.31135	11.5399	0	8.91449	5.83488	5.10245	8.14329	16.6045	19.4651	17.82	29.2769	NA
chr1:129091171..129091197,-	4.05553	2.05911	1.56257	21.2264	6.69223	8.56755	4.64416	4.77086	7.21233	3.84737	3.8169	2.19226	0.983229	1.74257	3.11611	0.935015	3.19566	1.87406	3.75347	0.64832	0	2.63459	6.2267	2.78073	3.24	3.3999	NA
chr1:129091198..129091208,-	1.15872	2.05911	0.195321	8.55515	2.54942	1.65823	2.4443	1.19271	1.61052	0.721382	0.293608	0.62636	0.983229	0.871285	0.519352	0.701261	1.77537	0	0.938367	0	0	0.718526	0	2.78073	2.43	0.377767	NA
chr1:129091213..129091239,-	2.70369	4.70654	3.90643	23.8091	6.05488	7.46206	4.1553	6.26175	6.23201	4.56876	1.46804	3.1318	2.70388	3.48514	3.63546	2.10378	3.55074	3.74813	2.8151	2.59328	0	2.27533	8.30226	2.78073	4.86	5.85538	NA
chr1:129091247..129091257,-	0.386241	1.47079	0.585964	4.35828	2.54942	1.65823	0.977719	1.19271	1.40045	1.92369	0.293608	0.62636	0.491614	0	0.519352	0.467507	1.06522	0	0.938367	0.64832	0	0.359263	0	1.39036	0.81	0.56665	NA
chr1:129105570..129105600,+	0	0	0	0	0	0	0	0	0	0	0	0	0	0	0	0.233754	0	0	0	0	0	0	0	0	0	26.2548	Mesenchymal
chr1:129117002..129117013,-	0	0	0	0	0	0	0	0	0	0	0	0	0	0.580857	0	0	0.532611	1.87406	1.40755	0	0	0.119754	0	0	2.025	31.3546	Mesenchymal
chr1:129121655..129121662,-	0	0	0	0	0	0	0	0	0	0	0	0	0	0	0	0	0	0	0	0	0	0	0	2.78073	2.025	25.4992	Mesenchymal
chr1:129127221..129127226,+	0	0	0	0	0	0	0	0	0	0	0	0.62636	0.491614	0	0.519352	0.233754	0.355074	0	0	0.64832	0	0	0	0	1.215	3.3999	NA
chr1:129127232..129127237,+	0	0	0.195321	0	0	0	0	0	0	0	0	0	0	0	0.519352	0	0.532611	0	1.40755	0	0	0	0	0	0	3.77767	NA
chr1:129127241..129127256,+	0.193121	0	0.195321	0	0	0	0	0	0	0	0	0.93954	0	0.290428	0.519352	3.74006	1.95291	5.62219	4.22265	4.53824	0	0.479017	0	1.39036	2.025	12.2774	Mesenchymal
chr1:129153456..129153461,+	0.193121	0	0	0	0	0	0	0	0	0	0.880823	1.5659	1.22904	1.45214	1.0387	0.935015	0.177537	1.87406	0.938367	1.94496	0	0.239509	2.07557	0	1.62	11.1441	NA
chr1:129164007..129164018,+	2.12433	1.17664	2.14854	2.7441	0.956033	1.93461	0.977719	2.08725	3.7112	3.60691	6.16576	5.01088	6.8826	5.22771	9.34833	3.0388	4.97103	1.87406	6.56857	18.8013	10.2049	3.83214	0	75.0796	36.045	17.3773	NA
chr1:129193734..129193751,+	1051.54	801.583	1089.7	940.42	787.134	1097.75	1108	1278.89	1430.49	1629.36	1631.28	1692.74	1741.54	1468.12	1535.72	844.084	749.738	1214.39	1666.54	1979.32	443.913	857.56	931.929	2787.68	2172.82	908.906	NA
chr1:129194195..129194221,+	0.965603	0.882477	0.195321	5.81104	5.7362	9.39666	6.35517	5.06904	7.07228	6.25198	2.34886	2.50544	0	1.16171	1.0387	1.16877	1.06522	3.74813	0	1.94496	0	1.79631	0	0	0	0.188883	NA
chr1:129195199..129195214,+	2.70369	2.64743	1.95321	2.66339	8.28562	10.5022	12.4659	20.8725	7.84253	8.17567	7.92741	2.50544	5.16195	10.165	5.71287	4.67507	1.4203	9.37031	3.28428	5.83488	0	5.5087	0	4.17109	3.24	2.83325	NA
chr1:129196731..129196749,-	5.79362	1.47079	4.49239	4.19686	2.23074	6.08019	5.13302	4.47268	6.58212	2.16415	4.99133	1.87908	4.67034	4.066	1.0387	2.57129	0.887685	0	0	0.64832	0	3.47287	0	5.56145	8.505	3.58878	NA
chr1:129238347..129238353,-	0	0	0	0	0	0	0	0	0	0	0	0	0.245807	0.290428	0	0.233754	0	0	0.469184	0	0	0	0	0	1.215	5.6665	NA
chr1:129238381..129238397,-	0	0	0.390643	0	0	0	0	0	0	0	0	0	0.245807	0.290428	0	0	0.710148	1.87406	1.87673	3.2416	0	0.119754	0	2.78073	2.43	59.6871	Mesenchymal
chr1:129253001..129253041,-	0	0	0	0	0	0	0	0	0	0	0	0.31318	0	0	0	0.233754	0.177537	0	0	0	0	0	0	4.17109	2.835	12.4663	Mesenchymal
chr1:129391348..129391359,+	0	0	0.390643	0.564962	0.637355	0	0	0.298179	0.630203	2.64507	0	1.5659	1.22904	0	0.519352	1.16877	2.13044	1.87406	0	2.59328	0	1.3173	2.07557	70.9085	18.225	0.188883	hepatocytes
chr1:12968092..12968103,+	29.9337	25.886	30.8608	75.4628	37.604	65.5003	75.0399	71.2647	90.5392	81.7567	70.1723	80.4873	59.2395	51.1154	56.09	36.2318	39.7683	16.8666	23.4592	97.248	10.2049	47.9017	64.3425	58.3953	45.765	28.3325	NA
chr1:12968104..12968108,+	5.21426	6.17734	6.25029	15.9804	7.64827	11.3313	18.5767	16.1017	20.5166	18.9964	16.1484	15.9722	19.9104	18.5874	9.86768	14.259	10.4747	0	1.87673	23.3395	5.10245	17.2446	10.3778	11.1229	8.1	4.91097	NA
chr1:129769180..129769184,-	7.33858	4.70654	13.6725	0	0	0	0	0	0	0	0	0	0.245807	1.74257	3.63546	9.81765	1.06522	0	0.938367	0.64832	0	21.7953	31.1335	0	0	4.91097	NA
chr1:129773062..129773071,-	5.02114	3.23575	5.85964	0	0	0	0	0	0	0	0	0	0.245807	0.290428	0	1.16877	1.59783	0	0.469184	0	0	4.55066	2.07557	0	0	4.72208	NA
chr1:129781140..129781174,-	6.95234	4.41238	27.1497	3.47048	0.637355	0.276372	0.488859	0	0.140045	0.240461	0	0.31318	0	4.066	5.19352	9.11639	4.26089	1.87406	1.87673	0	0	24.3101	29.0579	0	0	5.09985	NA
chr1:12982968..12982977,-	0.193121	0.294159	0	0.968507	1.27471	1.38186	1.22215	1.19271	1.05034	0.480922	0.293608	1.5659	0.245807	0	0	0.467507	0	0	0	0	0	3.35312	4.15113	0	0	0	NA
chr1:12983399..12983407,-	0.965603	0.294159	0.585964	0.403545	0.956033	1.10549	2.19987	0.298179	0.700226	1.92369	1.46804	3.75816	0.491614	1.16171	0.519352	1.16877	0.355074	0	0.469184	0.64832	0	4.79017	4.15113	0	0	0.56665	NA
chr1:12984360..12984369,-	0	0	0	0.322836	0.637355	0.829117	0.488859	0.298179	0.140045	0.961843	1.46804	1.87908	0.245807	0.290428	0	0.467507	0.355074	0	0	0.64832	0	3.11361	2.07557	0	1.215	0.188883	NA
chr1:12986068..12986093,-	0	0	0	0.807089	0.318678	0.552745	1.22215	0.596357	0.210068	0.961843	2.34886	2.50544	1.47484	0.290428	0.519352	3.0388	0.532611	0	0	0	0	5.98771	0	1.39036	0	0	NA
chr1:12986839..12986848,-	0	1.17664	0.390643	1.04922	1.91207	2.76372	1.95544	0.894536	0.0700226	0.480922	2.34886	4.07134	0.737422	1.16171	1.55806	1.87003	1.24276	0	0	0.64832	0	6.34698	2.07557	0	0.405	0.188883	NA
chr1:12986858..12986871,-	0.965603	1.47079	0.195321	1.45276	2.23074	4.69833	1.71101	0.894536	0.560181	1.44276	4.69772	0.93954	2.70388	0.871285	1.0387	3.0388	1.4203	0	0.938367	0	0	10.8976	6.2267	1.39036	1.215	0.377767	NA
chr1:12988218..12988230,-	3.28305	2.64743	2.7345	2.82481	2.23074	6.35657	5.86631	2.68361	1.47047	3.12599	9.39545	5.63724	3.93291	2.32343	1.0387	6.0776	1.06522	0	0	0.64832	0	18.9212	10.3778	0	4.455	1.51107	NA
chr1:12990489..12990497,-	0.193121	0.294159	0.195321	0.403545	0.637355	0.829117	1.46658	0	0.210068	1.44276	1.17443	0.31318	0.491614	0.580857	0	0.467507	0	0	0	0	0	3.23337	0	0	0.405	0	NA
chr1:12990507..12990514,-	0.386241	0.294159	0	0.72638	0.637355	0.552745	0	0.894536	0.350113	0.721382	0.880823	0	0.491614	0.290428	0	0.467507	0	0	0	0.64832	0	3.47287	2.07557	0	0.405	0.188883	NA
chr1:12994171..12994176,-	0.193121	0	0.390643	3.87403	1.59339	0	1.22215	0	1.12036	1.44276	0	0.62636	0	0.580857	0	0.233754	0.532611	0	0	0	0	1.19754	0	0	1.215	0	NA
chr1:12994184..12994242,-	27.8094	20.297	25.0012	131.071	58.9554	68.8167	64.7739	67.9848	129.192	100.032	41.1051	57.312	36.8711	36.0131	40.5094	21.9728	48.1125	13.1184	20.1749	19.4496	20.4098	50.5363	49.8136	36.1494	27.54	27.1992	NA
chr1:12994439..12994474,+	114.521	82.0703	85.3555	116.302	79.6694	106.127	100.705	110.028	136.964	105.562	83.3846	82.0532	70.7925	79.5774	100.754	56.8021	91.7866	59.97	74.131	112.159	15.3073	90.7737	105.854	116.791	95.9849	79.5199	NA
chr1:12994484..12994493,+	6.17986	5.29486	5.27368	14.4469	6.69223	11.6076	7.82175	8.05083	11.2036	6.01152	4.69772	3.44498	3.68711	2.32343	1.55806	3.5063	4.26089	1.87406	2.8151	6.4832	0	7.0655	6.2267	6.95182	2.835	4.5332	NA
chr1:129990416..129990456,+	4.82802	4.11823	4.29707	40.2737	11.1537	11.0549	9.28833	10.1381	10.2933	8.41613	4.11051	4.07134	2.45807	1.74257	4.15481	3.5063	5.85872	3.74813	3.75347	3.2416	0	12.2149	10.3778	0	0.405	1.32218	NA
chr1:130007598..130007601,+	0	0	0	0	0	0	0	0	0	0	0	0	0.245807	0	0.519352	2.57129	3.55074	1.87406	0.938367	0	0	0	0	0	0	0	NA
chr1:130007631..130007644,+	0	0	0	0	0	0	0	0	0	0	0	0	0	0	0.519352	7.24636	20.0617	16.8666	13.6063	0	0	0	0	0	0	0	NA
chr1:130100748..130100777,-	5.40738	6.4715	8.78947	14.689	5.41752	3.86921	6.11074	3.57814	7.42239	7.21382	3.8169	6.57678	3.93291	4.93728	5.71287	3.74006	6.03626	3.74813	7.50694	1.94496	0	4.31115	2.07557	1.39036	4.05	7.9331	NA
chr1:130100844..130100872,+	7.53171	6.17734	6.05497	7.02168	6.05488	8.29117	8.31061	10.1381	10.7135	18.0346	8.22102	6.2636	6.14518	10.165	15.5806	6.0776	10.1196	7.49625	10.322	12.9664	0	7.66427	12.4534	5.56145	8.91	5.85538	NA
chr1:130130044..130130104,-	0.965603	1.17664	0.585964	8.87798	6.37355	7.73843	11.4882	18.7853	25.2782	20.9201	73.6956	56.6856	82.0996	84.2242	39.4707	0.935015	0.887685	1.87406	7.03775	61.5904	35.7171	0.239509	0	30.588	26.73	21.9105	NA
chr1:130130125..130130140,-	0.193121	0	0	0.887798	0	1.10549	0.733289	1.78907	1.82059	3.12599	8.51463	11.2745	10.5697	11.3267	10.9064	0	0.355074	0	0.938367	11.0214	10.2049	0	0	4.17109	1.215	2.07772	NA
chr1:130130193..130130209,-	0	0	0	0.403545	0.956033	0.829117	2.19987	3.27997	3.08099	5.29014	14.6804	18.7908	15.4859	11.3267	11.9451	0	0	1.87406	0	12.9664	5.10245	0	0	0	0.405	0.944416	NA
chr1:130130239..130130250,-	0	0	0	0.0807089	0	0.552745	1.46658	1.49089	3.08099	2.64507	9.68906	14.4063	11.0613	9.29371	2.59676	0	0	0	0	8.42816	5.10245	0	0	0	0	0	NA
chr1:13013615..13013629,-	0.386241	0	0.390643	0	0	0	0	0	0	0	0	0	0	0	0	0	0	0	0	0	0	0	0	0	0.405	13.0329	Mesenchymal
chr1:130155763..130155769,-	0	0	0	0.564962	0.318678	1.38186	0.977719	1.49089	3.57115	0.240461	0.293608	0.62636	1.22904	0	0.519352	0	0	0	0	0	0	0	0	0	0	0	NA
chr1:130168050..130168053,-	0	0	0	0.403545	0.318678	1.65823	1.71101	4.1745	1.05034	2.16415	7.92741	1.87908	4.91614	11.0363	4.67417	0.467507	0	0	0.938367	2.59328	0	0	0	1.39036	0.81	0	NA
chr1:130170433..130170448,-	0	0	0	3.55119	1.59339	3.86921	5.13302	9.24354	13.8645	4.08783	13.506	14.7195	12.2904	9.58414	0	0	0.177537	0	0	0	0	0	0	2.78073	5.67	0	NA
chr1:130170682..130170698,-	0.193121	0	0.195321	7.90947	7.01091	11.0549	11.4882	26.8361	16.6654	27.653	39.9307	40.0871	52.6027	56.6335	10.387	0.701261	0.710148	0	5.6302	11.0214	0	0	2.07557	13.9036	7.695	0	NA
chr1:130170713..130170727,-	0.193121	0	0	8.1516	7.64827	10.2258	11.2438	23.5561	21.4269	21.1605	28.1863	19.7303	22.3685	23.8151	20.7741	2.33754	3.01813	5.62219	4.22265	29.8227	5.10245	0.83828	0	34.7591	20.655	0.56665	NA
chr1:130170732..130170751,-	0.772483	0.294159	0.390643	6.45671	4.78017	5.80382	10.5105	9.54172	11.1336	9.13751	12.3315	11.2745	10.5697	9.00328	6.23222	0.935015	1.24276	0	0.469184	2.59328	0	1.07779	0	11.1229	20.655	0.755533	NA
chr1:130170768..130170780,-	0	0	0.390643	3.14765	1.27471	2.48735	5.37745	4.1745	5.74185	5.04968	2.05525	3.75816	1.72065	2.61386	0.519352	0	0.532611	0	0	0	0	0.83828	0	8.34218	9.71999	0.56665	NA
chr1:130170862..130170907,-	0.386241	0.294159	0.195321	4.68112	3.18678	3.31647	7.82175	5.06904	4.9716	6.01152	2.34886	2.19226	2.45807	2.32343	1.55806	0.701261	0.887685	0	0.469184	1.94496	0	0.958034	2.07557	2.78073	0.405	0.377767	NA
chr1:130238675..130238693,-	1.93121	1.47079	1.56257	1.93701	1.27471	0.829117	0.977719	0.596357	3.99129	2.88553	1.46804	2.19226	0.491614	1.16171	1.0387	0.935015	0.532611	0	1.40755	0	0	1.07779	2.07557	0	0.405	1.69995	NA
chr1:130238721..130238766,-	13.1322	10.5897	12.1099	13.5591	15.6152	12.7131	15.6435	23.8543	20.9368	31.0194	26.7183	25.3676	19.6646	18.0066	18.6967	14.7265	15.2682	22.4888	8.91449	29.1744	0	19.5199	22.8312	5.56145	8.505	11.1441	NA
chr1:130238737..130238755,+	5.02114	3.52991	2.92982	15.8189	2.8681	9.94941	7.33289	6.55993	16.3853	15.8704	13.2124	9.70858	5.89937	4.64685	4.15481	2.57129	2.48552	0	0	0.64832	0	11.9754	8.30226	0	0.405	2.83325	NA
chr1:130251792..130251799,-	3.28305	4.41238	3.71111	0	0	0	0	0	0	0	0	0	0	0	0	0	0	0	0.469184	0	0	0	0	0	0	0	NA
chr1:130251809..130251818,-	3.08993	5.58902	3.51579	0	0	0	0	0	0	0	0	0	0	0	0	0.233754	0	0	0	0	0	0	0	0	0	0.188883	NA
chr1:130263868..130263882,-	2.89681	2.05911	2.34386	0.564962	0.318678	0	0.733289	0.298179	1.05034	0.721382	1.17443	0.31318	0.245807	1.16171	0.519352	0.467507	0.355074	0	0	0	0	0	0	1.39036	2.43	5.6665	NA
chr1:130263884..130263922,-	15.8359	17.3554	19.1415	1.85631	0.637355	1.38186	2.19987	3.27997	3.78122	1.92369	4.99133	5.95042	6.14518	6.97028	4.15481	2.10378	3.90581	0	2.8151	1.94496	20.4098	2.51484	2.07557	18.0747	14.985	28.1436	NA
chr1:130363757..130363761,-	15.6428	14.4138	7.03157	0.72638	0.637355	0.829117	0.24443	0.596357	0.28009	0.480922	0.293608	2.50544	2.45807	1.45214	0.519352	3.0388	4.97103	0	1.87673	3.88992	0	0.119754	0	1.39036	1.215	7.36645	NA
chr1:130364706..130364722,+	3.47617	1.47079	2.92982	2.58269	1.91207	1.93461	1.71101	0.894536	3.92126	2.40461	0.587216	3.1318	1.22904	1.74257	2.59676	1.16877	0.177537	0	4.22265	7.13152	0	1.3173	2.07557	0	1.62	4.15543	NA
chr1:130365891..130365912,-	10.8148	12.6488	8.39882	0.322836	0.318678	0.552745	0.733289	1.78907	1.12036	1.2023	3.8169	3.75816	5.40776	3.48514	4.15481	4.67507	5.14857	5.62219	12.668	9.07648	5.10245	0.239509	2.07557	0	0.405	6.7998	NA
chr1:13038527..13038541,-	0.579362	0.588318	0	0.0807089	0	0	0.24443	0	0.210068	0	0.293608	0	0	0	0	0	0.177537	0	0.469184	0	0	0.239509	0	115.4	83.025	3.3999	hepatocytes
chr1:13038543..13038548,-	0	0.588318	0	0.161418	0	0	0.24443	0	0.140045	0	0	0	0	0.290428	0	0	0	0	0	0	0	0	0	5.56145	8.505	1.1333	NA
chr1:13038553..13038598,-	11.201	13.8255	9.18011	2.66339	2.8681	2.76372	1.95544	3.87632	5.11165	3.12599	1.76165	3.44498	1.72065	2.32343	1.55806	1.87003	3.90581	0	3.75347	0.64832	0	1.19754	2.07557	65.3471	62.775	41.5543	NA
chr1:130394939..130394959,+	19.5052	15.5904	20.3134	23.6477	11.1537	15.4769	14.9102	19.0834	24.6479	23.8056	15.5612	18.4776	20.8936	18.5874	23.8902	17.064	28.9385	11.2444	34.7196	18.153	0	15.8076	16.6045	13.9036	10.53	29.6547	NA
chr1:130423379..130423390,+	3.28305	2.94159	3.90643	4.19686	2.8681	2.76372	4.1553	3.57814	5.53178	11.5421	8.80823	10.0218	8.11164	5.22771	8.82898	5.84384	3.3732	0	5.6302	4.53824	0	6.34698	2.07557	5.56145	0.81	4.72208	NA
chr1:130423404..130423461,+	124.756	95.3075	76.7613	44.632	28.0436	38.6921	34.9534	42.0432	54.1975	82.4781	42.5731	63.2624	44.2453	40.9504	45.7029	29.9205	31.9566	20.6147	58.1788	30.4711	56.1269	24.7891	29.0579	29.1976	12.96	136.563	NA
chr1:130423468..130423473,+	5.21426	4.70654	1.75789	1.53347	0.637355	0.552745	1.22215	0.596357	0.560181	1.44276	0	1.25272	0.245807	0.871285	0	0.233754	0	0	0.938367	1.94496	0	0.119754	2.07557	0	0	4.72208	NA
chr1:130423474..130423479,+	3.66929	2.05911	1.75789	0.322836	0.318678	0.276372	0	0	0.140045	0.240461	0	0.93954	0	0	0	0.233754	0.177537	1.87406	0.469184	0	0	0.119754	2.07557	0	0	1.69995	NA
chr1:130498741..130498760,-	5.21426	2.05911	4.49239	1.53347	1.27471	1.65823	0	1.19271	0.700226	0.961843	1.46804	2.19226	1.96646	1.16171	0.519352	0.467507	0.177537	0	0.938367	0.64832	0	0.119754	0	9.73254	18.225	4.72208	NA
chr1:130499159..130499171,-	3.47617	1.17664	2.34386	1.61418	0.956033	1.38186	1.95544	2.08725	2.1707	2.16415	0.587216	0	1.47484	3.19471	1.0387	0.935015	1.59783	0	2.34592	1.29664	0	0.479017	0	1.39036	0	3.3999	NA
chr1:130517238..130517263,-	11.7804	13.2372	15.821	8.31302	2.54942	5.52745	4.39973	6.55993	11.6237	12.2635	9.10184	6.88996	6.39099	7.26071	6.23222	7.24636	7.45655	7.49625	15.4831	10.3731	5.10245	4.79017	14.529	19.4651	11.34	8.12198	NA
chr1:130629180..130629191,+	0	0	0	0	0	0	0	0	0	0	0	0	0	0	0	0.467507	0	0	0.469184	0	0	0	0	26.4169	27.945	0	hepatocytes
chr1:130629206..130629214,+	0	0	0	0	0	0	0	0	0	0	0	0	0	0	0	0	0.177537	0	0.469184	0	0	0	0	22.2458	15.795	0	hepatocytes
chr1:130666472..130666480,+	0	0	0	0.0807089	0	0	0	0	0	0	0	0	2.21226	1.74257	4.15481	14.259	7.63409	5.62219	5.16102	0	0	0	0	0	0	0	middle_late
chr1:131178330..131178355,+	4.6349	10.5897	7.2269	0.645671	9.24165	5.25108	3.66644	5.06904	0.560181	3.12599	4.11051	4.38452	2.45807	4.066	4.67417	2.33754	6.92394	5.62219	1.87673	4.53824	15.3073	1.55681	6.2267	37.5398	16.605	6.61091	NA
chr1:131393738..131393764,+	3.86241	1.17664	3.71111	9.9272	0.318678	4.42196	1.95544	0.894536	7.91255	2.16415	0.587216	1.5659	3.93291	3.48514	3.63546	1.16877	0.887685	1.87406	3.28428	5.83488	0	1.3173	0	0	0.81	2.83325	NA
chr1:131727492..131727505,+	11.0079	22.0619	8.78947	0.484253	0	0.276372	0.24443	0	0.210068	0	0	0.31318	0	0	0	0.467507	0.532611	0	0.469184	0.64832	0	0	0	0	0	2.45548	NA
chr1:131727509..131727521,+	6.37298	13.5313	3.51579	0.484253	0	0	0.24443	0	0.0700226	0.240461	0	0.31318	0.245807	0.290428	0.519352	0.233754	0.532611	0	0	0	0	0	0	0	0	2.64437	NA
chr1:131727538..131727559,+	15.2565	18.532	8.39882	0.807089	0	0	0.488859	0	0.210068	0	0.587216	0	0	0.580857	1.55806	0.467507	1.77537	0	2.8151	0	0	0.359263	0	0	0	3.96655	NA
chr1:131837878..131837880,+	3.47617	4.70654	1.95321	0	0	0	0	0	0	0	0.293608	0	0	0.290428	0	0.233754	0	0	0	0	0	0	0	0	0	0.188883	NA
chr1:131922111..131922137,+	0	0	0.390643	4.60041	0.637355	0.829117	0.733289	0.298179	0.910293	0.721382	0.587216	0	0.491614	0	1.0387	0.467507	0	0	0	0.64832	0	0.239509	0	0	0.81	0	NA
chr1:131922303..131922323,+	2.12433	1.47079	1.17193	12.0256	5.09884	5.52745	6.5996	5.6654	7.42239	4.56876	2.64247	4.38452	2.70388	2.32343	2.07741	2.80504	2.48552	0	1.40755	3.88992	0	3.11361	2.07557	0	0.81	2.07772	NA
chr1:131922341..131922384,+	10.8148	9.41309	11.9146	51.4923	26.1316	32.3356	26.6428	33.396	29.1994	28.1339	18.7909	17.8513	14.011	15.3927	14.0225	11.2202	12.9602	5.62219	15.0139	16.208	5.10245	16.2866	29.0579	12.5133	7.29	9.25528	NA
chr1:131922454..131922503,+	18.5396	18.2379	20.8994	24.9391	8.6043	11.3313	8.06618	7.45447	16.5253	13.9467	8.80823	9.70858	8.60325	8.71285	12.9838	10.7527	13.1377	3.74813	12.1988	14.263	15.3073	9.7001	10.3778	34.7591	22.68	23.2326	NA
chr1:131922508..131922537,+	8.88355	8.23645	8.98479	15.6575	7.96694	6.35657	7.08846	8.349	11.1336	8.17567	5.28494	5.63724	6.14518	4.066	6.75157	2.80504	6.56887	0	2.34592	3.88992	0	5.14943	4.15113	6.95182	9.71999	7.36645	NA
chr1:132129130..132129140,+	0.579362	2.94159	1.95321	6.21459	3.50545	2.48735	3.42202	1.49089	5.11165	3.60691	3.52329	3.44498	3.19549	1.45214	3.11611	3.5063	5.50364	0	3.28428	1.94496	0	2.63459	2.07557	2.78073	1.62	4.15543	NA
chr1:132129144..132129149,+	0.772483	1.76495	1.17193	3.6319	0.956033	1.38186	1.71101	0.894536	2.45079	2.88553	0.880823	1.25272	1.47484	1.16171	1.0387	0.233754	2.48552	0	0	0	0	1.3173	0	5.56145	0.81	1.51107	NA
chr1:132129157..132129169,+	4.24865	5.29486	4.29707	10.25	3.50545	8.0148	4.1553	5.6654	7.63246	9.13751	2.64247	5.32406	4.91614	2.90428	4.67417	4.90883	6.21379	1.87406	4.69184	3.2416	0	3.59263	2.07557	5.56145	7.29	5.09985	NA
chr1:132129183..132129199,+	37.2723	21.4736	28.7123	50.6852	21.6701	15.7532	13.6881	13.418	19.8164	16.3513	11.1571	11.9008	17.4523	20.33	19.216	21.5053	45.8045	13.1184	33.312	24.6362	15.3073	16.2866	29.0579	129.304	97.6049	26.6325	NA
chr1:132210219..132210226,+	0	0	0	0	0	0.276372	0	0	0	0	0	0	0	0	0.519352	0	0	1.87406	0	0	0	0	0	0	0	0	NA
chr1:1322130..1322172,-	0	0	0	0	0	0.552745	0	0	0.0700226	0	0	0	2.45807	1.16171	1.0387	10.9864	22.7247	0	0	1.29664	0	1.3173	0	0	0	0	NA
chr1:132316008..132316019,-	3.28305	3.82407	3.12514	0.242127	0	0	0	0.298179	0	0.480922	0.587216	0	0	0.871285	1.55806	4.44132	1.77537	5.62219	2.8151	0	0	0.239509	0	2.78073	1.62	6.7998	NA
chr1:132343638..132343651,-	3.08993	4.70654	2.92982	1.69489	0.318678	1.38186	0.733289	1.78907	1.89061	3.12599	4.99133	4.38452	1.22904	4.35643	12.9838	9.11639	10.1196	28.1109	9.85285	7.77984	10.2049	2.8741	10.3778	4.17109	1.62	3.96655	NA
chr1:132343652..132343663,-	2.51057	2.35327	4.68772	1.85631	1.27471	0.829117	0.733289	1.19271	1.96063	0.961843	2.93608	2.19226	1.22904	1.45214	5.71287	4.20757	4.08335	5.62219	4.69184	5.83488	0	2.99386	4.15113	0	1.215	4.72208	NA
chr1:132351799..132351808,-	1.93121	3.52991	3.71111	3.6319	1.59339	1.38186	0.977719	0.894536	2.87093	3.60691	2.93608	1.5659	2.94969	2.033	1.0387	2.10378	2.30798	0	1.87673	0.64832	0	2.8741	4.15113	1.39036	1.62	1.1333	NA
chr1:132351811..132351838,-	25.1057	25.886	30.2748	42.4529	21.9888	32.6119	29.3316	27.7306	39.4227	54.8251	46.9772	37.8948	50.3905	58.6665	46.7417	39.2706	30.7139	28.1109	76.0077	46.0307	15.3073	49.5783	51.8891	23.6362	35.235	28.7103	NA
chr1:132351892..132351937,+	29.5475	26.4743	28.1263	19.5316	15.2965	21.8334	21.9987	17.2944	19.7464	15.63	13.7996	18.7908	14.5026	15.3927	12.9838	7.71387	12.4276	5.62219	10.322	18.153	10.2049	11.0174	12.4534	25.0265	31.185	23.0438	NA
chr1:132352130..132352155,-	2.31745	0.882477	2.53918	16.3032	12.1098	14.095	11.2438	13.418	15.1249	14.4276	12.9187	6.88996	7.86583	5.22771	9.86768	4.20757	3.90581	0	4.22265	11.0214	0	6.70624	2.07557	5.56145	4.05	0.56665	NA
chr1:132407699..132407702,+	0	0	0	0	0	0	0	0	0	0	0	0	0	0	0	0	0	0	0	0	0	0	0	0	0	0	NA
chr1:132435045..132435054,-	0	0.588318	0.390643	0.72638	0.637355	0.552745	0.488859	0.894536	1.12036	0.240461	0	0.31318	0.983229	0	0	3.0388	1.95291	5.62219	3.28428	1.29664	5.10245	0	2.07557	2.78073	1.215	5.85538	NA
chr1:132435071..132435082,-	1.35184	1.47079	2.34386	1.69489	0.318678	0.276372	0	1.19271	2.24072	1.2023	0.293608	0.31318	0.245807	0.580857	0.519352	0.701261	4.08335	1.87406	2.34592	0	5.10245	0.359263	2.07557	0	6.075	9.44416	NA
chr1:132528635..132528671,-	8.88355	5.0007	8.00818	0	0	0	0	0	0	0	0	0	0	0	0	0	0	0	0	0	0	0	0	0	0	0.944416	NA
chr1:132535259..132535260,+	0.579362	0	0	0.242127	0	0	0	0.298179	0.490158	0.961843	3.22969	0.62636	0.983229	0.871285	4.15481	0.233754	0.177537	0	0.469184	0	0	0.83828	0	0	0	0	NA
chr1:132544518..132544572,+	12.746	9.11893	8.78947	46.0848	20.7141	24.5971	14.9102	10.1381	13.5144	9.85889	6.75298	7.51632	8.60325	7.84157	4.67417	4.67507	9.58699	1.87406	7.97612	4.53824	10.2049	6.34698	8.30226	8.34218	6.885	8.68863	NA
chr1:132554881..132554891,-	0.772483	0.294159	0.390643	3.6319	1.59339	1.93461	1.46658	2.08725	1.61052	1.44276	0.587216	0.62636	1.22904	1.16171	1.55806	0.935015	0.532611	0	0	0.64832	0	0.83828	2.07557	1.39036	0.81	0.188883	NA
chr1:132554905..132554928,-	1.93121	2.05911	3.90643	10.7343	4.14281	4.9747	4.64416	3.27997	4.9716	4.32829	3.22969	3.44498	1.96646	1.45214	6.75157	1.87003	2.84059	0	2.8151	2.59328	5.10245	4.07165	0	9.73254	3.645	3.21102	NA
chr1:132554997..132555016,+	83.6212	61.7734	78.7146	69.2482	53.5379	73.7914	65.0183	90.05	78.6354	116.623	103.937	97.7122	94.1442	93.5179	115.296	53.2958	40.656	52.4738	61.463	120.588	71.4342	83.7082	116.232	88.9833	57.51	55.1539	NA
chr1:132572776..132572782,-	0	0	0	0	0	0	0	0	0	0.240461	0	0	0.983229	4.35643	11.9451	0.233754	0.177537	39.3553	54.8945	20.0979	5.10245	0	0	1.39036	2.43	0	NA
chr1:132572832..132572862,-	0	0	0	0	0	0	0	0.298179	0.0700226	0	0	0.62636	2.70388	14.5214	11.4257	0.701261	0.532611	5.62219	7.03775	20.7462	0	0	0	33.3687	36.855	0	middle
chr1:132600665..132600679,-	6.95234	7.64813	7.81286	2.50198	2.23074	2.48735	0.733289	1.19271	2.45079	3.36645	2.64247	1.87908	1.47484	1.16171	1.55806	2.10378	0.887685	0	1.40755	2.59328	0	1.43705	4.15113	2.78073	1.215	3.02213	NA
chr1:132601447..132601481,+	45.9627	53.8311	57.4245	112.185	55.7686	63.842	61.3518	81.1046	90.1191	111.574	68.7042	77.3555	45.7201	47.3398	58.6867	29.2192	39.5907	37.4813	36.1271	70.6669	20.4098	61.4339	64.3425	44.4916	27.945	55.5317	NA
chr1:132601532..132601541,+	2.51057	2.35327	1.75789	1.45276	2.54942	6.63294	2.68873	2.08725	0.910293	3.84737	7.04659	4.07134	2.21226	3.19471	2.59676	3.97381	1.59783	0	0.938367	1.94496	0	9.34083	4.15113	1.39036	0.81	2.45548	NA
chr1:132601715..132601720,-	0	0	0	0	0	0	0	0	0	0	0	0	0	0	0	0	0	0	0	0	0	0	0	0	0	0	NA
chr1:132609253..132609264,+	3.66929	19.7087	6.25029	0	0	0	0	0.298179	1.12036	0.961843	0.587216	0.31318	0	0	1.0387	0	0	0	0	0.64832	0	0	0	0	0.405	14.1662	NA
chr1:132609280..132609291,+	1.54497	20.8853	0.976607	0	0	0	0	0	0.140045	0.240461	0	0	0	0	0	0	0	0	0	0	0	0	0	0	0	23.0438	NA
chr1:132613458..132613469,+	0.772483	3.82407	1.36725	0.645671	0.956033	1.10549	1.71101	0.596357	0.420135	1.44276	3.52329	2.50544	1.47484	1.16171	1.0387	1.87003	0.532611	0	0	0.64832	0	7.90378	2.07557	1.39036	0	1.51107	NA
chr1:132614158..132614173,+	5.6005	15.5904	4.29707	2.34056	4.14281	6.63294	4.39973	3.27997	1.40045	5.04968	13.7996	16.5985	5.16195	2.61386	1.0387	8.18138	1.4203	0	0.469184	5.83488	0	18.6817	12.4534	4.17109	1.62	5.28873	NA
chr1:132614411..132614418,+	0.965603	2.64743	1.56257	0.403545	0.637355	0.552745	0.488859	1.49089	0.28009	1.2023	1.46804	1.25272	0.737422	0.580857	0	0.467507	0.355074	0	0	0.64832	0	2.8741	0	0	0.405	0.188883	NA
chr1:132614495..132614507,+	2.31745	4.70654	1.95321	1.69489	2.8681	2.76372	2.19987	2.98179	1.12036	3.84737	6.16576	7.8295	1.72065	1.16171	1.55806	2.10378	1.77537	0	0	0	0	9.7001	2.07557	1.39036	2.835	0.944416	NA
chr1:132615177..132615190,+	1.35184	5.58902	0.585964	0.807089	3.82413	2.48735	1.71101	2.38543	0.560181	3.36645	5.87216	4.6977	1.72065	0.871285	3.11611	3.27255	0	1.87406	1.40755	1.94496	0	4.90993	0	0	0.405	1.88883	NA
chr1:132615199..132615210,+	0.386241	1.47079	0.195321	0.403545	3.18678	1.10549	0.977719	0.894536	0.210068	1.44276	3.22969	2.19226	2.70388	2.033	2.59676	4.90883	0.355074	0	1.40755	1.94496	0	3.83214	6.2267	0	0.405	0.56665	NA
chr1:132615503..132615514,+	2.89681	8.82477	1.36725	1.69489	2.8681	1.10549	0.977719	1.19271	0.980316	2.40461	5.57855	5.01088	3.19549	0.580857	1.0387	4.67507	1.4203	0	1.87673	0.64832	0	13.652	2.07557	1.39036	0	2.83325	NA
chr1:132615545..132615562,+	7.14546	29.1217	6.83625	4.35828	8.92298	6.90931	6.84403	2.68361	1.5405	8.41613	25.5439	21.2962	12.0446	4.93728	7.27092	14.0252	2.66305	16.8666	5.16102	8.42816	0	38.3214	26.9823	2.78073	2.025	5.85538	NA
chr1:132616873..132616888,+	2.89681	9.11893	1.75789	0.484253	1.59339	1.38186	0.733289	0.596357	0.490158	1.68323	7.6338	3.75816	1.47484	2.033	3.11611	5.61009	1.06522	1.87406	0	0.64832	0	11.1371	8.30226	0	1.62	3.77767	NA
chr1:132762309..132762310,+	0.193121	0	0.195321	0.161418	0	0	0	0	0	0.240461	1.46804	2.19226	0.491614	1.45214	1.55806	1.16877	0	13.1184	3.28428	7.13152	10.2049	0.359263	4.15113	0	0	0	late
chr1:132793968..132793970,-	0.193121	0.294159	0.195321	0.403545	0	0	0	0	1.26041	0.240461	0.587216	0.31318	0	0.290428	0	0	0	0	0	0	0	0.119754	0	0	0	0.377767	NA
chr1:132951068..132951070,+	0.386241	0	0	0	0.637355	0.829117	0.488859	0	0	0.721382	0.293608	2.19226	0.737422	0.580857	0	1.40252	0.355074	1.87406	2.34592	0	0	2.03582	6.2267	0	0	0.188883	NA
chr1:133135589..133135593,+	0	0	0	0	0	0	0	0	0	0	0	0	0	0	0	0	0	0	0	0	0	0	0	0	0	0	NA
chr1:133137471..133137496,-	7.14546	8.82477	12.3053	10.815	2.54942	3.86921	3.66644	5.6654	12.6041	6.97336	5.87216	5.95042	5.40776	7.26071	3.11611	3.27255	7.98916	1.87406	6.09939	3.2416	5.10245	3.35312	0	4.17109	7.29	10.7663	NA
chr1:133137501..133137522,-	2.89681	1.47079	2.7345	8.63585	3.18678	3.0401	2.68873	4.77086	6.79219	7.21382	4.11051	3.44498	4.42453	4.35643	3.63546	2.57129	5.68118	0	0.469184	2.59328	10.2049	3.35312	0	0	1.62	2.64437	NA
chr1:133188664..133188672,+	0	0	0	0.322836	0	0.276372	0.24443	1.19271	0.140045	1.2023	1.46804	2.50544	1.72065	2.90428	3.11611	0.233754	3.01813	3.74813	21.5824	7.77984	15.3073	0	0	0	0.405	0	NA
chr1:13319184..13319201,-	3.66929	1.76495	0.585964	0	0	0.276372	0.733289	2.38543	3.36108	3.12599	3.22969	5.63724	2.45807	5.22771	4.67417	18.7003	38.7031	0	6.56857	0	0	0.718526	2.07557	4.17109	1.215	0	NA
chr1:133213546..133213553,-	0	0	0	15.4154	0.956033	0.552745	0.24443	0	0	0	0	0	0	0	0	0	0	0	0	0	0	0	0	0	0	0	early
chr1:133215655..133215664,+	2.12433	1.76495	4.68772	1.53347	0.637355	1.10549	0.733289	1.19271	2.38077	3.84737	2.93608	3.75816	1.72065	0.871285	2.59676	0.935015	1.77537	0	0.938367	2.59328	0	1.19754	0	0	0	2.07772	NA
chr1:133215674..133215718,+	105.251	122.664	136.53	64.0022	42.3841	50.5762	46.4416	65.8975	81.9964	130.089	77.5125	123.08	94.1442	84.5147	103.87	64.0485	68.8843	46.8516	89.6141	137.444	30.6147	57.3623	62.267	36.1494	30.375	77.8199	NA
chr1:133215721..133215750,+	46.1558	44.1238	42.5801	53.51	29.9557	36.7575	33.4869	39.6578	55.2478	43.5234	36.4074	40.0871	25.8098	17.1353	14.5418	21.2716	24.145	11.2444	18.7673	16.8563	0	31.7349	26.9823	12.5133	12.15	23.2326	NA
chr1:133433703..133433722,+	142.716	71.4806	82.035	133.493	88.5924	120.498	114.149	119.868	145.297	148.364	142.4	157.843	101.764	102.231	61.2835	52.8283	47.4024	7.49625	29.0894	30.4711	20.4098	160.471	126.609	93.1543	70.065	66.1091	NA
chr1:133433732..133433747,+	1062.94	799.23	1113.14	368.92	267.371	447.171	418.219	443.392	523.419	789.914	1227.28	1151.88	1337.19	1326.1	969.63	1197.29	786.666	575.337	1189.85	1149.47	683.728	939.233	1041.93	955.18	733.455	652.969	NA
chr1:133434519..133434530,+	0.579362	0	0.390643	0.645671	0.318678	1.93461	1.46658	1.19271	1.61052	0.721382	2.05525	1.25272	0.983229	1.16171	0	0.233754	0.177537	0	0	0	0	0.718526	0	1.39036	0.405	0	NA
chr1:133434576..133434587,+	0.772483	0.588318	0.195321	0.887798	2.8681	2.76372	1.95544	2.98179	0.910293	3.36645	3.8169	1.5659	2.45807	3.77557	3.63546	1.40252	0.355074	0	3.28428	3.2416	0	2.75435	4.15113	0	0.81	1.1333	NA
chr1:133437957..133437969,+	1.15872	1.76495	23.2433	0.72638	1.91207	3.59284	2.4443	1.19271	0.770248	6.01152	4.69772	3.1318	3.19549	5.22771	3.11611	7.71387	1.24276	0	3.75347	1.94496	0	5.26919	2.07557	6.95182	1.215	0.755533	NA
chr1:13348575..13348579,-	1.54497	0.294159	0.781286	0.242127	0.318678	0.276372	0.24443	0	0.210068	0.480922	1.17443	0.62636	1.47484	0.871285	0	0.467507	0.355074	0	0	0	0	1.79631	2.07557	0	0.405	0.188883	NA
chr1:133510779..133510802,+	3.86241	5.0007	3.12514	10.9764	6.37355	9.94941	12.9548	7.15629	12.464	10.3398	8.22102	7.8295	7.86583	8.71285	13.5031	5.14258	6.39133	0	2.8151	8.42816	5.10245	5.74821	6.2267	2.78073	2.43	2.83325	NA
chr1:133510803..133510839,+	5.98674	3.23575	2.14854	17.191	8.28562	15.2005	9.77719	14.0144	14.9148	8.17567	7.6338	14.4063	7.86583	7.26071	7.79028	3.0388	6.03626	0	3.28428	7.13152	0	7.54452	14.529	2.78073	6.075	4.34432	NA
chr1:133510854..133510865,+	0.965603	1.47079	0.585964	4.03545	1.27471	1.93461	1.46658	1.78907	4.48144	1.68323	1.17443	3.44498	2.94969	2.033	1.55806	1.16877	2.66305	1.87406	0.469184	0	0	1.3173	0	1.39036	0.81	0.755533	NA
chr1:133510915..133510941,+	3.86241	4.70654	6.05497	13.7205	6.69223	7.46206	8.31061	5.06904	12.8842	11.7826	9.98266	12.214	11.7987	13.3597	14.5418	5.37633	7.81163	7.49625	8.91449	19.4496	5.10245	6.34698	12.4534	13.9036	3.645	3.3999	NA
chr1:133553705..133553715,-	0	0	0.195321	0.242127	0.318678	0	0.24443	0.298179	0	0	0	0	0	0	0.519352	0	0	3.74813	0	0	0	0	0	157.111	101.655	0	hepatocytes
chr1:133553725..133553734,-	0	0	1.17193	1.12992	0.318678	0.276372	1.71101	1.19271	1.82059	0.961843	1.76165	0.31318	1.47484	0	0.519352	1.16877	0.887685	1.87406	0.938367	1.94496	0	1.07779	2.07557	1.39036	1.62	0.755533	NA
chr1:133553803..133553812,-	0.579362	0	0.585964	2.34056	0.956033	2.76372	0.733289	0.894536	1.40045	1.44276	1.17443	0.62636	0.491614	0.580857	0.519352	0.467507	0.532611	0	0.469184	0.64832	0	0.958034	0	1.39036	0.405	0.377767	NA
chr1:133553813..133553831,-	2.51057	1.76495	2.92982	5.89175	2.8681	3.86921	2.93316	4.1745	5.11165	5.5306	2.64247	3.75816	2.45807	2.61386	7.27092	2.33754	3.3732	0	2.8151	3.2416	0	2.63459	6.2267	1.39036	0.81	3.02213	NA
chr1:133574829..133574837,-	2.12433	2.64743	1.36725	0.807089	0.318678	1.10549	1.22215	1.19271	0.980316	4.56876	1.46804	0.93954	2.45807	3.19471	3.63546	3.5063	3.19566	3.74813	6.09939	3.88992	0	0.239509	0	4.17109	11.34	2.83325	NA
chr1:133650353..133650364,+	0	0	0	0.807089	0.956033	2.76372	2.4443	2.68361	1.75056	2.88553	0.587216	2.50544	1.47484	1.16171	3.63546	0.233754	0.355074	0	0	12.3181	0	0	0	0	0	0	NA
chr1:133650415..133650423,+	0.193121	0	0	1.29134	0.637355	1.65823	2.4443	0.596357	2.45079	2.88553	1.76165	2.19226	1.47484	2.033	0.519352	0.233754	0.532611	0	0.469184	1.94496	0	0.119754	0	0	0.405	0	NA
chr1:133650447..133650468,+	0.772483	0.588318	0.976607	6.376	4.14281	8.0148	11.4882	10.4363	8.6828	15.8704	5.57855	8.45586	5.65357	5.22771	8.82898	1.16877	0.887685	1.87406	1.40755	12.3181	0	1.19754	2.07557	1.39036	1.62	0.377767	NA
chr1:133650689..133650708,+	0.772483	0	0.976607	3.55119	3.18678	2.76372	1.95544	4.47268	3.50113	6.7329	6.75298	5.95042	7.62002	8.132	6.23222	1.63628	0.710148	0	1.40755	12.3181	5.10245	0.718526	2.07557	9.73254	5.265	1.1333	NA
chr1:133650717..133650726,+	0.772483	0.588318	0.195321	1.53347	0.637355	0.829117	2.4443	2.38543	1.68054	3.84737	2.64247	2.81862	3.19549	3.19471	3.11611	0.467507	0	1.87406	0.469184	4.53824	5.10245	0.359263	0	4.17109	5.67	0.944416	NA
chr1:133650737..133650763,+	3.28305	2.64743	2.14854	15.4154	6.69223	11.0549	13.1992	10.1381	13.7944	19.9582	13.7996	15.9722	13.0278	11.9076	7.79028	4.67507	4.61596	3.74813	0.469184	5.83488	0	6.94575	0	12.5133	9.71999	4.91097	NA
chr1:133650777..133650801,+	3.66929	3.82407	1.95321	26.2304	14.9779	17.6878	18.3322	19.0834	24.4379	29.3362	24.6631	20.0435	18.4355	23.2343	18.6967	18.2328	11.3624	5.62219	10.322	18.8013	0	17.2446	18.6801	6.95182	10.53	6.98868	NA
chr1:133650810..133650818,+	0.772483	1.17664	0.781286	3.38977	1.59339	1.65823	3.42202	2.08725	2.24072	2.16415	2.05525	2.81862	1.96646	3.77557	0.519352	0.467507	1.4203	0	0.469184	0.64832	0	2.51484	4.15113	0	0.405	0.755533	NA
chr1:133650851..133650923,+	48.6664	64.4208	59.3777	38.9017	27.0876	32.3356	32.5091	50.3922	48.8057	81.2757	49.0325	73.2841	55.5524	75.5114	79.4608	81.58	79.7141	24.3628	70.3775	70.0186	15.3073	36.6448	56.0403	29.1976	21.06	85.753	NA
chr1:133651341..133651390,+	15.4497	17.0612	17.7743	10.9764	7.01091	8.84392	7.08846	10.4363	9.38303	25.9698	14.0932	13.4667	10.3239	12.7788	17.658	8.88264	7.63409	1.87406	5.6302	8.42816	0	4.1914	10.3778	12.5133	10.125	18.3217	NA
chr1:133651398..133651412,+	4.24865	5.29486	2.34386	1.12992	1.91207	1.38186	1.71101	1.19271	2.94095	4.56876	0.587216	1.5659	1.96646	0.871285	0.519352	0.467507	0.710148	0	0	0	0	0.239509	2.07557	0	2.43	3.58878	NA
chr1:133684292..133684295,+	0.772483	0.588318	0.390643	1.7756	0.956033	1.65823	1.95544	0.298179	0.630203	2.88553	2.64247	3.44498	1.22904	4.35643	2.07741	1.16877	2.13044	0	1.40755	3.2416	0	0.479017	0	1.39036	1.215	2.64437	NA
chr1:133757108..133757156,-	2.12433	2.05911	1.17193	0.484253	0.956033	0.552745	1.46658	0.298179	0.0700226	1.92369	0.293608	0.31318	0.491614	0.290428	1.0387	0.467507	0.532611	29.985	1.87673	0.64832	5.10245	0.479017	0	2.78073	3.24	0.377767	late
chr1:133824438..133824442,+	0	0	0	0	0	0	0	0	0	0	0	0	0	0	0.519352	0	0.177537	0	0	1.94496	0	0	0	0	1.215	104.264	Mesenchymal
chr1:133879844..133879854,+	0.772483	1.47079	0.585964	0.161418	0	0	0.488859	0	1.26041	0	0.293608	0.31318	0.245807	1.16171	0	0	0.177537	0	0.469184	0	0	0.239509	0	30.588	17.82	1.32218	hepatocytes
chr1:133879866..133879876,+	0.965603	0.588318	0.390643	0	0	0	0	0.298179	0.0700226	0	0	0.62636	0	0.290428	0	0.233754	0.355074	0	0	0	0	0	0	37.5398	8.505	3.3999	NA
chr1:133880097..133880143,+	0.193121	0.588318	0.195321	0	0	0	0.977719	0.298179	0.490158	0.480922	0.880823	0.31318	0.737422	0.290428	0	0.935015	0.355074	3.74813	4.69184	0.64832	0	0.239509	0	22.2458	24.3	0.56665	hepatocytes
chr1:133882841..133882846,+	0	0.588318	0.390643	0	0.318678	0	0	0	0.0700226	0	0	0	0	0	0	0.233754	0.710148	0	0.469184	0	0	0.119754	0	9.73254	17.415	6.42203	hepatocytes
chr1:133922487..133922493,+	0.193121	1.47079	0.585964	0	0.318678	0	0	0.298179	0	0	0	0.62636	0	0.580857	0.519352	1.63628	1.06522	0	0.469184	0	0	0.718526	0	9.73254	12.555	0.377767	NA
chr1:133946557..133946599,+	0.579362	0.882477	13.4772	0.968507	0.318678	0.552745	0	1.19271	1.61052	1.2023	7.34019	10.6481	10.5697	10.7459	6.75157	2.57129	2.48552	3.74813	1.87673	7.13152	0	0	0	1.39036	3.24	0	NA
chr1:134054540..134054544,+	0	0	0	0	0	0	0	0	0	0	0	0	0	0	0.519352	0	0	0	0.469184	0	0	0	0	0	0	0	NA
chr1:134117329..134117351,-	4.44177	3.82407	4.10175	3.30907	1.27471	3.0401	2.4443	2.68361	3.43111	4.32829	3.8169	4.6977	5.89937	5.51814	6.75157	3.5063	3.55074	3.74813	3.75347	5.18656	5.10245	2.15558	4.15113	8.34218	5.67	5.47761	NA
chr1:134124655..134124668,+	0	0	0	0	0	0	0	0	0	0	0	0	0	0.290428	0	10.2852	16.866	3.74813	20.1749	0	0	0	0	0	0	0	NA
chr1:134124684..134124695,+	0	0	0	0	0	0	0	0	0	0	0	0	0.245807	0	0	3.5063	6.39133	9.37031	31.4353	0	0	0	0	0	0	0	NA
chr1:13416541..13416594,-	18.5396	7.64813	13.8678	28.8938	18.4833	26.8081	18.8211	21.4689	36.2717	23.5652	19.0845	15.9722	14.7484	13.3597	11.9451	10.7527	12.0725	5.62219	4.69184	5.83488	5.10245	20.478	14.529	8.34218	4.05	12.0885	NA
chr1:1341894..1341924,+	16.2221	11.4722	14.4538	50.6045	32.5051	43.1141	35.9312	36.0796	39.7728	27.653	12.9187	13.7799	8.60325	11.0363	8.82898	7.48012	17.9312	11.2444	9.38367	9.7248	10.2049	15.089	14.529	6.95182	4.86	11.1441	NA
chr1:1341931..1341938,+	2.31745	2.05911	2.14854	3.87403	2.8681	3.31647	1.46658	2.08725	3.50113	1.44276	1.46804	0.93954	0.737422	2.033	1.55806	0.701261	1.06522	0	0.938367	1.94496	0	0.958034	0	0	0	1.88883	NA
chr1:13439361..13439362,+	0	0	0	0	0	0	0	0	0	0	0	0	0	0	0	0	0	0	0	0	0	0	0	0	0	0	NA
chr1:134901..134904,+	0	0	0	0	0	0	0	0	0.140045	0	0	0	0.245807	5.80857	0	0	0	0	0	0	5.10245	0	0	0	0	0.188883	NA
chr1:135049920..135049930,+	0.579362	0.588318	0.781286	0	0	0	0	0	0.0700226	0	0	0.62636	1.47484	3.19471	9.34833	6.31135	3.90581	3.74813	1.87673	0	0	0.239509	0	0	0	0	NA
chr1:135127369..135127425,+	30.5131	22.6502	35.1579	25.1812	13.0658	19.0697	21.7542	28.327	39.4927	49.054	25.2503	25.0544	26.5472	26.7194	18.6967	19.4016	18.4638	13.1184	23.4592	21.3946	0	20.3582	35.2846	31.9784	23.895	19.6439	NA
chr1:135127373..135127386,-	3.47617	1.47079	1.75789	0.242127	0.637355	0.276372	0.488859	0.596357	0.700226	2.64507	0.880823	0.31318	0.737422	0.580857	1.0387	0	0.355074	0	0	0	0	0.359263	0	0	0	2.07772	NA
chr1:135127427..135127466,+	16.8015	7.64813	15.4304	40.5159	22.3074	34.8229	31.287	34.2906	55.1778	43.7639	21.4334	28.1862	17.4523	15.9736	11.4257	5.61009	10.4747	1.87406	9.38367	5.18656	0	20.478	22.8312	19.4651	18.225	6.7998	NA
chr1:135213842..135213873,-	11.0079	11.178	10.5474	11.8642	7.01091	5.80382	5.13302	6.55993	9.52307	10.5803	7.92741	10.9613	6.14518	11.0363	13.5031	7.01261	11.3624	5.62219	17.3598	20.7462	20.4098	6.94575	4.15113	13.9036	13.77	22.0993	NA
chr1:135215419..135215454,+	13.7116	17.6495	15.821	38.4174	14.3405	17.1351	12.4659	10.1381	16.1752	14.4276	11.4507	6.2636	9.83229	13.0693	15.5806	11.2202	14.0254	13.1184	18.7673	20.7462	5.10245	13.7717	20.7557	11.1229	10.53	12.4663	NA
chr1:135255710..135255733,-	25.1057	33.24	16.407	0	0	0	0	1.49089	0.700226	0.480922	2.93608	2.81862	14.5026	9.58414	8.82898	19.8691	23.0798	14.9925	15.4831	23.3395	5.10245	0.119754	0	0	0	0	NA
chr1:135255734..135255758,-	37.6585	39.4173	22.462	0.161418	0	0.276372	0.24443	0.596357	0.980316	0	2.34886	4.07134	9.34067	11.3267	9.34833	21.7391	24.5001	14.9925	12.1988	16.8563	5.10245	0.479017	0	0	0.405	0.188883	NA
chr1:135269292..135269310,-	0	0	0	0	0	0	0.24443	0.298179	0.0700226	0	0	0	0.245807	0.290428	2.07741	6.5451	4.43842	9.37031	7.97612	0	0	0	0	0	0	0	NA
chr1:135350128..135350129,+	1.73809	0.882477	1.75789	0.161418	0	1.10549	1.22215	0.596357	0	1.2023	4.99133	5.95042	4.67034	4.64685	5.71287	1.63628	0.887685	65.5922	5.16102	29.1744	25.5122	0.718526	8.30226	1.39036	0	0.188883	late
chr1:135356637..135356638,-	0	0	0	0	0	0	0	0	0	0	0	0	0	0	0	0	0	0	0	0	0	0	0	0	0	0	NA
chr1:135367031..135367052,+	4.24865	3.82407	5.85964	10.1693	3.18678	5.80382	2.19987	2.38543	6.09196	1.92369	2.34886	4.07134	1.22904	0.871285	2.07741	1.40252	6.03626	1.87406	1.87673	1.29664	0	2.15558	2.07557	1.39036	2.025	8.12198	NA
chr1:135367140..135367167,+	1.73809	2.05911	3.71111	8.1516	3.50545	6.08019	4.1553	5.06904	3.85124	6.49244	3.52329	3.44498	4.91614	4.64685	6.75157	3.74006	3.72828	1.87406	5.16102	7.13152	5.10245	3.71238	2.07557	0	0.81	3.96655	NA
chr1:135506229..135506250,+	0	0.294159	0.195321	0.0807089	0	0	0	0	0.28009	0.961843	2.64247	1.5659	2.21226	3.48514	14.0225	21.5053	38.5255	13.1184	27.6818	2.59328	0	5.62845	10.3778	0	0	0.188883	middle_late
chr1:135506264..135506292,+	0.772483	0.294159	0.390643	0.645671	0	0.276372	0	0.298179	0.770248	0	1.17443	1.87908	1.22904	2.90428	5.19352	15.194	45.2719	5.62219	7.97612	0	0	5.26919	4.15113	0	0.405	0.377767	middle_late
chr1:135570658..135570679,-	5.79362	3.82407	4.68772	4.03545	3.82413	1.65823	2.19987	2.98179	4.69151	2.40461	1.46804	1.25272	2.21226	1.74257	0.519352	0.935015	1.77537	0	0.938367	1.29664	0	1.3173	2.07557	0	0.81	3.21102	NA
chr1:135570694..135570719,-	10.6216	6.17734	12.5006	3.47048	4.46149	4.69833	4.1553	3.27997	4.76154	6.01152	4.69772	7.51632	5.40776	4.066	6.75157	3.0388	4.26089	3.74813	6.56857	6.4832	0	2.75435	4.15113	2.78073	4.455	5.85538	NA
chr1:135787251..135787267,-	7.33858	10.8839	11.524	0.242127	0	0	0	0.894536	0	0.240461	0	0.31318	0.245807	0.580857	0	0.701261	0.355074	0	0	1.29664	0	0.119754	0	0	0	2.83325	NA
chr1:135787283..135787297,-	6.17986	9.11893	12.8912	0.0807089	0	0.276372	0	0	0.0700226	0	0.880823	0.93954	0.983229	1.16171	2.59676	0.701261	1.4203	0	0.938367	1.94496	10.2049	0.119754	0	0	0	2.45548	NA
chr1:135787839..135787849,-	1.35184	1.76495	9.76607	0	0	0	0.24443	0	0.0700226	0	0	0.31318	0.491614	0.580857	0.519352	3.27255	2.30798	3.74813	0	0	0	0.239509	0	0	0	0.755533	NA
chr1:135787858..135787866,-	2.12433	3.23575	7.2269	0	0	0	0	0	0	0	0	0	0	0.290428	0	0.701261	0.532611	0	0.469184	0	0	0	0	0	0	0	NA
chr1:135788152..135788178,-	10.2354	10.2956	18.5555	1.29134	1.27471	1.93461	1.46658	1.49089	1.19038	1.44276	2.34886	2.50544	2.45807	3.48514	6.75157	4.44132	5.85872	0	0.938367	1.94496	0	2.03582	12.4534	0	0	3.58878	NA
chr1:136249937..136249951,-	0	0	0	0.0807089	0	0	0	0	0.28009	0.961843	7.6338	7.51632	2.94969	4.93728	2.59676	0	0.355074	1.87406	0.469184	1.94496	0	0	0	0	0.81	0	NA
chr1:136254617..136254626,+	0.193121	0	0	0.645671	0.318678	0.552745	0.977719	2.08725	1.89061	3.12599	10.2763	12.214	10.0781	6.67985	5.71287	0.701261	0.532611	1.87406	2.8151	15.5597	0	0.119754	0	5.56145	2.43	0	NA
chr1:136254648..136254666,+	0	0.294159	0.195321	3.95474	2.54942	1.93461	2.93316	14.6108	14.9848	32.4622	98.3586	167.551	65.6305	66.7985	97.1188	5.14258	1.77537	16.8666	20.6441	390.289	0	0	0	12.5133	12.15	0	NA
chr1:136255161..136255185,+	0	0	0	0	0	0	0	0.298179	1.89061	5.04968	66.3554	88.9431	95.619	96.7127	47.261	14.7265	11.895	13.1184	18.2982	49.2723	15.3073	0	0	58.3953	213.84	0	NA
chr1:136255191..136255202,+	0	0	0	0	0	0	0	0	0.210068	0.961843	4.40412	8.45586	10.3239	11.3267	4.67417	1.40252	0.532611	0	2.8151	2.59328	5.10245	0	0	4.17109	6.075	0	NA
chr1:136302998..136303025,+	16.6084	15.5904	17.9696	5.97246	2.8681	6.08019	3.66644	2.38543	3.64117	2.64507	3.8169	2.50544	3.93291	3.77557	7.79028	6.5451	8.87685	1.87406	6.09939	8.42816	5.10245	7.0655	10.3778	4.17109	3.645	5.85538	NA
chr1:136303047..136303062,+	7.91795	6.76566	7.2269	2.34056	0.637355	1.38186	0.24443	1.19271	1.05034	0.721382	1.46804	1.87908	0.983229	2.033	1.55806	2.57129	4.61596	1.87406	7.03775	1.94496	0	4.79017	4.15113	0	0	3.96655	NA
chr1:136329656..136329665,+	0	0	0	0.0807089	0	0	0	0	0	0	0	0	0.245807	0	0	0.233754	0.177537	0	0.469184	1.94496	0	0	0	0	0.405	20.3994	Mesenchymal
chr1:136329697..136329713,+	0	0	0	0	0	0	0	0	0	0	2.05525	2.50544	3.4413	4.066	3.11611	1.16877	1.24276	3.74813	3.75347	9.07648	5.10245	0.479017	0	0	0.81	40.0433	Mesenchymal
chr1:136349533..136349571,+	4.44177	5.88318	8.59415	0.0807089	0	0	0	0	0.0700226	0	0	0	0	0	0	0	0.177537	1.87406	1.87673	0	0	0	0	0	0	0.944416	NA
chr1:136368448..136368496,+	26.2644	22.0619	12.5006	22.6792	12.4284	10.5022	14.1769	16.698	25.6283	27.8935	22.0206	20.9831	14.5026	42.4025	15.5806	27.5829	35.1523	3.74813	15.4831	12.3181	20.4098	30.7768	16.6045	1.39036	2.43	18.6994	NA
chr1:136409273..136409290,+	4.6349	5.88318	3.51579	15.9804	7.64827	10.7785	9.77719	6.85811	8.82284	9.61843	6.45937	8.76904	2.94969	4.93728	4.15481	6.31135	3.90581	5.62219	3.75347	5.18656	5.10245	6.34698	4.15113	4.17109	1.215	2.45548	NA
chr1:136409291..136409310,+	6.17986	2.35327	2.92982	15.4154	5.09884	7.18568	5.62188	5.06904	8.19264	8.41613	5.57855	3.75816	2.45807	4.066	5.71287	2.33754	3.55074	1.87406	3.75347	1.94496	5.10245	5.5087	16.6045	5.56145	0.405	3.3999	NA
chr1:136409326..136409347,+	5.79362	3.23575	3.90643	13.1556	7.96694	11.0549	5.13302	7.15629	10.7135	12.7444	7.34019	3.44498	6.39099	6.97028	6.75157	3.74006	3.3732	11.2444	8.4453	6.4832	0	5.86796	4.15113	6.95182	2.43	3.21102	NA
chr1:136409363..136409401,+	18.7327	10.0014	16.0164	55.447	30.9117	37.5867	27.6206	27.4324	41.2433	33.4241	20.2589	15.0326	11.5529	9.29371	4.15481	9.5839	11.3624	0	6.56857	2.59328	5.10245	16.0471	10.3778	20.8554	12.555	30.2213	NA
chr1:136530188..136530191,+	0	0	0	0	0	0	0	0	0	0	0.880823	2.81862	2.94969	5.51814	8.82898	0.233754	0	0	0	0.64832	0	0	0	0	0	0	NA
chr1:136776990..136776993,+	0	0	0	0	0	0	0	0	0	0	0	0	0	0	0	0	0	0	0	0	0	0	0	0	0	0	NA
chr1:136853555..136853573,-	0.965603	0.294159	0.585964	0.887798	0.318678	0.829117	0.977719	0.894536	1.40045	2.16415	6.75298	14.4063	8.84906	9.29371	6.75157	1.87003	2.84059	0	2.34592	4.53824	0	0.718526	0	18.0747	9.315	13.0329	NA
chr1:136853768..136853780,+	1.35184	2.64743	2.53918	1.29134	0	1.10549	0.977719	1.19271	1.82059	1.68323	7.6338	5.95042	9.34067	4.93728	10.9064	2.10378	3.55074	5.62219	7.97612	14.9114	0	1.3173	2.07557	2.78073	4.455	24.5548	NA
chr1:136908831..136908871,-	3.28305	4.11823	5.27368	35.5926	13.0658	16.5823	17.3545	13.1199	23.5976	13.2253	4.11051	8.76904	3.4413	5.22771	2.07741	2.80504	10.4747	0	1.40755	2.59328	0	6.82599	8.30226	11.1229	5.67	4.5332	NA
chr1:136908908..136908913,-	0	0	0.195321	2.50198	0.318678	1.65823	0.24443	0.596357	0.770248	0.480922	0.293608	0	0.245807	0	0.519352	0	0	0	0	0.64832	0	0	0	0	0.405	0.377767	NA
chr1:136908955..136908984,-	3.86241	3.82407	4.88304	13.0748	5.41752	5.52745	9.53276	7.15629	11.0636	8.89705	1.46804	5.63724	2.94969	4.066	4.67417	1.16877	4.08335	0	2.34592	3.88992	0	0.598771	2.07557	4.17109	6.48	3.02213	NA
chr1:136936825..136936839,-	6.5661	2.94159	1.75789	4.03545	2.23074	1.65823	1.71101	1.78907	3.08099	3.36645	0.293608	1.87908	0.737422	0.580857	1.0387	2.80504	3.90581	0	2.8151	0	0	3.23337	2.07557	0	0.405	0.944416	NA
chr1:136958998..136959039,-	9.46291	7.94229	8.00818	29.8623	18.4833	26.2554	19.5544	19.3816	25.1381	20.4392	6.75298	12.8404	6.8826	17.1353	9.86768	5.14258	12.7827	3.74813	5.6302	3.88992	0	11.8557	2.07557	11.1229	6.075	6.23315	NA
chr1:137003345..137003384,+	36.4998	51.4778	56.2526	8.55515	4.14281	7.18568	4.39973	10.1381	16.8754	21.8819	10.8635	18.4776	15.24	20.9108	35.8353	28.5179	62.1379	54.3478	72.7234	23.3395	5.10245	11.9754	18.6801	12.5133	5.67	130.896	NA
chr1:137167890..137167902,+	2.31745	20.0028	4.10175	0.807089	0	0.829117	0	0.894536	2.31075	1.44276	2.64247	1.5659	0.245807	1.45214	1.55806	0.467507	1.06522	0	1.40755	1.29664	0	0	0	1.39036	0.405	0.377767	NA
chr1:137167908..137167917,+	2.12433	9.70725	2.92982	0.242127	0	0.276372	0.24443	0	1.19038	1.44276	0.293608	1.25272	0.491614	0.290428	0	0	0.177537	0	0.938367	0.64832	0	0	0	0	0	0.377767	NA
chr1:137167919..137167941,+	4.05553	32.0633	6.25029	2.58269	0.637355	1.10549	1.71101	2.98179	4.27138	5.04968	1.46804	3.44498	1.47484	4.64685	5.19352	0.935015	1.95291	0	5.6302	8.42816	5.10245	0.239509	0	0	0.405	3.21102	NA
chr1:137167956..137167974,+	5.79362	32.6516	5.469	2.17914	1.91207	1.65823	1.46658	2.68361	4.62149	7.93521	2.34886	6.57678	1.22904	3.48514	3.11611	0.701261	1.95291	0	2.8151	4.53824	5.10245	0.239509	0	1.39036	0.81	0.944416	NA
chr1:137288880..137288893,+	5.21426	1.76495	5.66432	3.22836	0.318678	1.38186	2.19987	2.98179	3.57115	2.40461	0.880823	3.44498	1.72065	2.033	1.55806	0.701261	0.710148	0	1.40755	4.53824	0	1.07779	4.15113	0	0	2.2666	NA
chr1:137293736..137293739,+	0	0	0	0.161418	0	0	1.46658	1.19271	1.12036	0	0	0	0	0	0	0.233754	1.95291	1.87406	3.28428	0	0	0	0	0	0	0	NA
chr1:137345148..137345171,-	21.6295	15.8846	15.6257	34.2206	28.0436	39.7976	38.8643	39.3596	46.0749	22.3629	28.1863	29.7521	24.5807	8.71285	18.1773	7.01261	11.7174	3.74813	5.16102	16.208	5.10245	28.8608	35.2846	1.39036	1.215	7.55533	NA
chr1:137345615..137345659,-	6.75922	5.29486	7.2269	64.0829	32.5051	35.9284	35.1979	27.1343	36.2717	20.6796	16.1484	14.0931	13.2736	11.0363	12.9838	9.35015	9.94207	13.1184	5.6302	16.208	5.10245	18.9212	12.4534	8.34218	4.455	4.72208	NA
chr1:137345670..137345697,-	3.28305	1.47079	2.92982	27.7639	11.1537	18.517	11.7326	11.9271	14.1446	8.65659	6.16576	5.63724	5.16195	3.77557	5.19352	1.87003	1.59783	1.87406	2.8151	5.18656	0	4.07165	4.15113	0	2.025	1.69995	NA
chr1:137345712..137345721,-	1.15872	0.882477	1.75789	8.63585	2.8681	3.31647	3.17759	2.38543	4.55147	3.84737	2.34886	1.25272	2.94969	0.580857	2.07741	0.935015	0.532611	0	0	1.94496	0	1.67656	2.07557	1.39036	1.215	2.2666	NA
chr1:137383323..137383354,+	1.73809	2.35327	2.14854	1.93701	1.27471	0.276372	0.977719	0.894536	3.15102	1.2023	0.880823	0.93954	2.21226	3.77557	2.59676	1.87003	0.887685	0	6.09939	3.2416	0	0.718526	0	4.17109	4.86	1.32218	NA
chr1:137383458..137383483,+	8.30419	12.943	13.6725	13.2363	8.6043	13.2659	8.31061	6.85811	9.52307	6.49244	10.5699	9.70858	8.11164	8.71285	10.387	8.64889	8.52177	5.62219	13.6063	6.4832	5.10245	6.22722	6.2267	12.5133	8.1	4.34432	NA
chr1:137411088..137411097,+	0	0	0	0	0	0.276372	0	0.298179	0.140045	0	0.587216	0.31318	0.245807	0.290428	0	4.44132	10.6522	0	3.75347	0	0	0	0	0	0	0	NA
chr1:137458545..137458561,+	0.386241	0	0	2.50198	1.59339	2.76372	2.93316	2.98179	2.52081	4.80922	4.40412	5.95042	11.3071	5.51814	8.82898	0.467507	0.887685	9.37031	2.34592	11.6698	5.10245	0.359263	0	2.78073	1.215	0	NA
chr1:137458572..137458606,+	0	0	0	6.69884	3.82413	8.0148	6.11074	5.06904	8.12262	12.2635	20.5525	29.4389	29.4969	28.462	25.4482	1.16877	1.95291	9.37031	9.38367	29.1744	5.10245	0.718526	0	0	3.645	0.188883	NA
chr1:137488083..137488105,-	3.08993	1.76495	1.75789	0.645671	0.318678	1.10549	1.95544	0.596357	1.26041	3.84737	7.92741	3.44498	7.12841	8.132	0.519352	1.63628	0.887685	0	0	0	0	0.119754	0	30.588	6.48	7.9331	NA
chr1:137489025..137489062,-	3.08993	3.82407	3.71111	0.968507	0.637355	4.69833	2.68873	3.27997	1.68054	1.2023	5.57855	3.75816	4.42453	4.64685	5.71287	2.10378	0.532611	3.74813	0.938367	6.4832	5.10245	1.79631	0	5.56145	12.555	9.0664	NA
chr1:137505654..137505659,-	1.54497	0.882477	2.34386	2.01772	2.23074	0.829117	2.4443	3.57814	5.11165	3.60691	4.69772	5.32406	6.63679	3.77557	3.63546	0.701261	1.4203	0	0.938367	3.88992	0	0.958034	0	6.95182	14.175	36.8322	Mesenchymal
chr1:137505679..137505700,-	17.574	13.8255	22.2667	18.7245	14.0218	18.2406	25.6651	27.4324	44.1842	48.0922	62.2449	68.2733	70.7925	54.0197	34.7966	11.6877	7.45655	22.4888	27.2126	113.456	40.8196	2.51484	4.15113	112.619	112.59	255.559	NA
chr1:137505705..137505765,-	159.325	200.616	266.809	151.087	122.691	180.748	260.806	287.146	336.949	282.782	382.571	407.76	468.263	354.323	366.662	98.8778	110.428	153.673	251.952	742.975	423.503	50.2968	74.7203	882.881	728.19	654.858	NA
chr1:137545703..137545724,-	10.2354	25.2977	13.8678	7.82876	2.8681	3.59284	6.84403	5.6654	9.17296	10.8207	12.9187	11.5877	13.7652	12.4884	5.71287	4.44132	8.1667	1.87406	10.7912	16.208	0	4.1914	4.15113	27.8073	22.275	18.1328	NA
chr1:137546356..137546363,+	5.02114	3.23575	4.68772	5.89175	2.54942	4.14559	4.39973	3.87632	3.7112	2.40461	3.22969	2.81862	3.19549	2.61386	3.63546	3.74006	2.84059	1.87406	3.75347	5.83488	10.2049	5.26919	6.2267	2.78073	1.62	3.77767	NA
chr1:137546367..137546393,+	73.579	63.5383	49.0257	69.0061	48.439	73.2387	74.7955	79.0174	76.3946	58.1915	75.1636	52.3011	49.6531	46.1781	46.2223	42.0757	38.8806	28.1109	36.5963	58.3488	25.5122	69.3377	56.0403	30.588	36.855	44.5765	NA
chr1:137567383..137567397,-	0	0	0	0	0	0	0.24443	0	0.840271	1.68323	12.9187	15.3458	26.5472	22.363	10.387	2.80504	3.19566	1.87406	5.6302	12.3181	0	0	0	90.3736	90.315	0	NA
chr1:137567412..137567431,-	0	0	0	0	0	0	0	0.596357	0.700226	2.40461	19.6717	22.549	51.1279	56.6335	20.7741	2.57129	2.66305	0	2.8151	16.8563	0	0	0	132.085	101.25	0	NA
chr1:137577081..137577092,-	0	0	0	0	0	0	0	0	0	0	0	0	0	0	0	0	0	0	0.938367	0	0	0	0	140.427	116.64	0.188883	hepatocytes
chr1:137577101..137577128,-	0	0	0	0	0	0	0	0	0	0.240461	0	0	0.245807	0	0	0.701261	0.710148	26.2369	69.9083	0	0	0	0	2552.71	3340.84	0	NA
chr1:137577151..137577155,-	0	0	0	0	0	0	0	0	0	0	0	0	0	0	0	0	0	1.87406	0.469184	0	0	0	0	20.8554	27.54	0	hepatocytes
chr1:137592360..137592372,-	0	0.588318	0	0.72638	0.637355	0.829117	1.71101	1.19271	1.40045	0.961843	0	2.50544	1.72065	3.19471	3.11611	1.16877	0.887685	1.87406	2.34592	2.59328	0	0.479017	2.07557	29.1976	40.095	1.88883	hepatocytes
chr1:137592375..137592383,-	0	0	0.390643	0.242127	0	0.552745	0.488859	0.298179	0.210068	0.480922	0	1.25272	0.983229	0.580857	0	0.467507	0.532611	0	0.469184	0.64832	0	0	0	18.0747	19.845	1.1333	hepatocytes
chr1:137592423..137592436,-	0.193121	0	0.195321	0.322836	0	0.276372	0.733289	0.596357	0.490158	0.240461	0.587216	1.87908	1.72065	1.74257	2.59676	1.87003	3.3732	9.37031	15.4831	9.7248	5.10245	0.479017	0	265.559	169.695	20.3994	hepatocytes
chr1:137592454..137592464,-	0.193121	0.294159	0	0.0807089	0.318678	0	0.24443	0	0	0.240461	0.587216	0.62636	0.737422	0.290428	1.0387	0.233754	1.24276	0	1.40755	1.94496	0	0.119754	0	25.0265	17.01	1.51107	hepatocytes
chr1:137603545..137603556,-	0	0	0	0	0	0	0	0	0	0	0.293608	0.93954	2.21226	0.290428	0	0.701261	1.95291	0	0.938367	0	0	0	0	86.2025	46.575	1.51107	hepatocytes
chr1:137603566..137603581,-	0	0	0	0	0	0	0	0	0.28009	0.240461	3.22969	4.07134	9.09487	6.67985	7.27092	3.5063	2.13044	7.49625	7.97612	9.7248	0	0	0	125.133	97.6049	11.7108	hepatocytes
chr1:137603585..137603596,-	0	0	0	0	0	0	0	0.298179	0	0.240461	1.46804	0.93954	1.22904	1.16171	1.0387	0.701261	2.30798	3.74813	0.938367	0	0	0	0	27.8073	14.985	7.36645	hepatocytes
chr1:13763826..13763839,-	28.9681	25.5918	25.0012	3.71261	4.14281	4.69833	6.11074	6.55993	3.99129	11.3017	9.68906	14.4063	12.0446	20.9108	31.1611	12.6227	19.5291	16.8666	29.5586	32.416	10.2049	7.18526	14.529	41.7109	17.01	10.3886	NA
chr1:13764646..13764697,+	16.9946	19.4145	22.2667	33.0099	15.2965	21.5571	17.8434	22.0652	24.858	20.6796	18.2037	22.8621	27.0388	30.2046	59.2061	33.6605	49.7103	43.1034	60.0555	73.9085	35.7171	23.7113	37.3602	36.1494	27.135	23.0438	NA
chr1:137654985..137654986,-	0	0	0	0	0	0	0	0	0	0	0	0	0	0	0	0	0	0	0	0	0	0	0	0	0	0	NA
chr1:137747293..137747294,+	0.965603	0.294159	0.781286	0.72638	0.637355	0.276372	0.488859	0.298179	0.350113	0	1.76165	1.25272	0.983229	0.580857	0	0.935015	0.355074	0	0	1.29664	0	1.43705	2.07557	0	0.81	0.188883	NA
chr1:137754891..137754905,-	0.193121	0	0.195321	0.161418	0.318678	0.552745	0.488859	0.596357	0.840271	0.480922	0.293608	1.25272	0	0.580857	0.519352	2.33754	3.01813	1.87406	2.34592	0	0	2.27533	4.15113	11.1229	10.125	0	NA
chr1:137886041..137886051,-	6.95234	8.53061	13.8678	0.645671	0.318678	0	0.24443	0.298179	0.420135	0.721382	0.587216	0.31318	1.96646	0.290428	2.07741	0.935015	1.24276	1.87406	1.87673	0.64832	0	0.239509	0	0	0	13.9774	NA
chr1:137886053..137886078,-	64.1161	57.361	98.6374	9.12011	2.8681	6.90931	7.33289	7.75265	10.8535	10.3398	19.3781	14.4063	22.6143	13.9406	19.216	14.4927	19.5291	33.7331	27.6818	36.3059	5.10245	4.79017	4.15113	0	0	110.119	NA
chr1:137919184..137919210,+	8.88355	8.53061	10.1567	22.2757	14.9779	15.2005	11.7326	13.418	18.696	13.9467	12.3315	12.214	8.60325	11.6171	10.9064	9.11639	8.1667	5.62219	13.6063	11.6698	5.10245	14.4903	16.6045	5.56145	8.505	8.49975	NA
chr1:137919211..137919242,+	7.33858	7.64813	5.469	34.4627	10.5164	22.3862	12.9548	15.2071	24.5079	20.6796	14.3868	15.3458	14.2568	17.1353	8.82898	11.4539	9.58699	1.87406	4.22265	3.2416	0	27.304	14.529	2.78073	4.86	7.36645	NA
chr1:137968874..137968875,+	0.193121	0.294159	0.390643	0.242127	0	1.38186	1.22215	0	0.0700226	0.721382	1.17443	0.31318	0.737422	0.580857	0	0.233754	0.710148	0	0	0.64832	0	1.43705	2.07557	0	0	0	NA
chr1:138642319..138642320,-	0	0	0	0	0	0	0	0	0	0	0	0	0	0	1.0387	0	0	24.3628	1.40755	0.64832	0	0	0	0	0	0	late
chr1:138653373..138653387,-	0.386241	1.47079	0.585964	21.4686	10.1977	7.73843	7.82175	2.98179	4.06131	8.17567	6.75298	8.76904	8.11164	7.84157	9.34833	12.6227	10.6522	24.3628	21.1133	3.2416	25.5122	6.94575	10.3778	157.111	135.675	0.377767	hepatocytes
chr1:138653401..138653417,-	0	0.588318	0.195321	5.48821	3.18678	3.31647	2.4443	2.38543	2.24072	2.88553	3.8169	2.50544	2.21226	5.51814	4.67417	4.90883	3.55074	1.87406	8.91449	2.59328	5.10245	7.18526	10.3778	13.9036	17.01	0	NA
chr1:138903915..138903964,-	10.2354	125.606	18.3602	1.93701	3.18678	4.9747	13.1992	36.0796	33.4008	62.5198	49.6197	77.6687	70.055	45.3068	58.1674	29.453	61.2502	86.2069	174.067	112.159	45.922	2.63459	2.07557	5.56145	10.53	4.15543	NA
chr1:138904007..138904024,+	0.772483	17.3554	3.71111	1.37205	1.27471	2.48735	9.28833	15.2071	14.7748	15.63	15.8548	19.104	15.4859	12.4884	9.86768	6.77886	11.1848	14.9925	33.7812	15.5597	5.10245	2.03582	0	2.78073	0.81	0.944416	NA
chr1:138904014..138904043,-	2.89681	29.1217	4.29707	0.322836	0.318678	0	1.95544	2.38543	5.46176	5.29014	5.87216	8.76904	5.65357	5.80857	9.34833	2.10378	7.27901	14.9925	26.7435	33.7127	5.10245	0.359263	0	1.39036	2.025	0.944416	NA
chr1:138904042..138904060,+	2.12433	16.4729	2.14854	0.807089	1.27471	0.276372	1.22215	5.6654	7.56244	8.89705	9.10184	15.3458	11.0613	7.26071	9.34833	2.80504	5.68118	0	7.50694	5.18656	10.2049	0.718526	2.07557	0	1.215	0.755533	NA
chr1:138904044..138904067,-	5.79362	78.2463	13.8678	0.322836	0.956033	0.552745	1.95544	7.45447	9.94321	11.7826	14.6804	12.5272	21.3852	12.7788	21.8128	6.31135	16.1559	14.9925	31.9045	21.3946	10.2049	0.958034	4.15113	4.17109	6.48	2.64437	NA
chr1:138904111..138904179,+	7.53171	60.5967	9.37543	1.12992	0.637355	1.38186	9.53276	22.3634	30.1797	35.8287	27.3055	45.4111	30.9717	20.33	18.1773	9.5839	30.3588	14.9925	59.5863	33.7127	10.2049	0.958034	4.15113	13.9036	6.48	2.07772	NA
chr1:138929395..138929396,+	0.772483	5.58902	1.75789	0	0	0	0	0	0	0	0	0	0	0	0	0.233754	0.177537	0	2.34592	0.64832	0	0	0	0	0	0	NA
chr1:139082006..139082022,-	4.82802	5.0007	7.03157	27.5217	19.4393	32.3356	22.2431	19.3816	22.4072	25.7293	13.2124	17.2249	10.8155	12.4884	25.4482	5.37633	9.40946	9.37031	17.829	32.416	61.2293	5.02968	0	23.6362	20.25	61.3871	NA
chr1:139085217..139085220,-	0	0	0	0	0	0	0	0	0	0	0	0	0	0	0	0	0.532611	0	1.40755	0	0	0	0	8.34218	7.695	0	NA
chr1:13909256..13909269,-	13.3253	12.943	15.821	1.7756	0.637355	0.552745	0.733289	0.596357	2.38077	0.961843	7.92741	2.81862	10.0781	8.132	17.1386	25.0116	37.1052	13.1184	34.7196	14.263	0	10.0594	6.2267	0	0.405	12.2774	NA
chr1:139117398..139117452,+	5.02114	5.88318	6.44561	13.3977	8.6043	14.3714	13.6881	11.9271	14.0745	15.3895	9.10184	9.70858	8.84906	9.87457	8.30963	3.74006	6.92394	5.62219	8.91449	7.77984	10.2049	2.15558	2.07557	19.4651	23.085	11.333	NA
chr1:139117475..139117478,-	0	0	0	0	0	0	0	0	0	0	0	0	0	0	0	0	0	0	0	0	0	0	0	0	0	0	NA
chr1:139118463..139118480,+	1.35184	2.05911	1.56257	8.39373	2.54942	7.18568	6.5996	7.75265	9.17296	7.45428	4.99133	5.01088	2.45807	3.77557	2.07741	4.20757	2.84059	0	3.75347	1.29664	0	2.75435	0	36.1494	23.895	1.69995	NA
chr1:139146349..139146353,-	0	0	0	0	0	0	0	0	0	0	0	0	0	0	0	0	0	0	0.938367	0	0	0	0	0	0	0	NA
chr1:139203733..139203742,-	2.89681	2.05911	1.56257	3.14765	0.637355	2.76372	2.68873	3.57814	4.76154	5.77106	2.93608	5.01088	1.96646	2.32343	4.15481	0.233754	1.24276	0	0.938367	1.94496	5.10245	1.43705	2.07557	8.34218	7.695	2.2666	NA
chr1:139203753..139203798,-	16.2221	21.4736	17.7743	22.4371	17.5273	19.6224	22.2431	25.9415	33.2607	33.1836	14.3868	24.1149	27.0388	16.264	19.7354	8.64889	18.1088	11.2444	8.91449	31.7677	10.2049	12.5742	24.9068	43.1013	44.55	21.1549	NA
chr1:139209440..139209449,+	0.965603	0.294159	0.976607	1.53347	1.27471	0.276372	0.24443	0.894536	0.28009	1.2023	0.293608	1.25272	0.491614	0.871285	3.11611	0.467507	1.59783	1.87406	1.87673	1.29664	0	0.479017	0	1.39036	0.405	0.56665	NA
chr1:139209464..139209480,+	0.772483	0.294159	2.92982	5.73033	2.23074	6.35657	2.19987	1.19271	2.10068	3.12599	2.93608	2.81862	1.47484	2.033	2.07741	1.87003	1.59783	1.87406	3.75347	3.2416	0	2.63459	4.15113	0	0.81	0.755533	NA
chr1:139209658..139209670,+	8.69043	11.4722	6.64093	12.0256	8.92298	13.2659	13.1992	7.75265	8.54275	7.45428	11.4507	6.57678	7.86583	6.67985	11.4257	7.94762	15.4457	3.74813	8.91449	7.77984	0	6.70624	4.15113	11.1229	9.71999	6.7998	NA
chr1:139210875..139210881,-	1.54497	1.17664	1.75789	1.61418	1.27471	1.10549	2.93316	1.49089	0.840271	2.88553	1.46804	1.87908	2.94969	3.77557	6.75157	1.40252	1.59783	0	2.34592	9.7248	5.10245	2.75435	0	1.39036	1.62	1.1333	NA
chr1:139275703..139275714,-	4.05553	1.47079	2.92982	2.42127	0.956033	0.829117	1.22215	0.596357	1.40045	2.16415	1.17443	2.81862	1.96646	4.35643	4.67417	3.74006	6.92394	0	2.8151	0	0	3.35312	2.07557	0	0.81	6.42203	NA
chr1:139275726..139275755,-	22.7882	18.8262	25.0012	8.55515	4.46149	7.18568	9.28833	9.24354	13.0242	19.2369	18.7909	27.873	23.5975	34.561	56.6093	49.5558	56.2792	33.7331	61.9322	60.9421	5.10245	35.4473	49.8136	6.95182	5.265	25.4992	NA
chr1:139308282..139308292,+	1.15872	0.588318	0.195321	0.807089	0.318678	0.276372	0	0.596357	0.28009	0.480922	0	0.93954	0.737422	0.290428	2.07741	3.5063	6.21379	0	2.34592	0	0	2.75435	0	0	0	0.188883	NA
chr1:139319494..139319524,+	4.44177	5.29486	4.88304	9.9272	3.50545	3.59284	2.19987	3.87632	5.81187	3.36645	6.45937	5.01088	3.68711	3.19471	3.63546	8.18138	8.52177	1.87406	6.09939	3.88992	0	4.1914	2.07557	5.56145	6.48	8.31086	NA
chr1:139319602..139319618,+	0	0.294159	0.195321	7.34451	3.18678	3.86921	5.62188	3.87632	4.27138	2.64507	2.93608	2.19226	1.22904	0.290428	1.55806	0.467507	1.59783	0	2.34592	3.2416	0	1.43705	2.07557	0	0	0.377767	NA
chr1:139347787..139347792,+	7.72483	2.64743	1.17193	0.484253	0.318678	1.65823	0.733289	0.596357	4.3414	5.77106	7.04659	6.88996	5.40776	6.38942	6.75157	10.5189	10.2971	7.49625	13.1371	7.13152	0	4.67042	0	0	1.62	17.3773	NA
chr1:139380403..139380419,+	0.965603	1.47079	0.976607	0.484253	0	0.276372	0	0	0	0	0.293608	0.31318	0.491614	0.871285	2.07741	6.0776	3.01813	14.9925	7.97612	1.29664	0	1.91607	0	0	0	0.944416	late
chr1:13977785..13977823,+	5.79362	4.41238	5.469	22.5178	11.1537	12.4368	11.9771	16.1017	17.5757	15.3895	4.99133	8.14268	4.17872	2.90428	6.23222	2.80504	4.61596	0	3.75347	7.13152	0	7.30501	8.30226	4.17109	4.86	5.85538	NA
chr1:13977825..13977868,+	7.91795	7.94229	7.03157	17.5138	7.32959	8.84392	9.53276	8.64718	16.3853	13.7063	5.28494	5.63724	3.4413	3.19471	3.63546	5.61009	7.27901	0	1.40755	3.88992	10.2049	3.23337	2.07557	11.1229	6.075	10.3886	NA
chr1:139920436..139920437,+	0	0	0	0	0	0	0	0	0	0	0.293608	0.31318	0	0	2.07741	0.467507	0.532611	5.62219	8.91449	1.94496	0	0	0	50.0531	20.25	0	hepatocytes
chr1:14000077..14000097,+	5.02114	2.05911	3.90643	4.03545	1.91207	3.31647	2.68873	1.78907	2.73088	1.68323	2.64247	1.25272	1.22904	3.19471	1.55806	1.63628	3.01813	0	1.87673	1.94496	0	1.91607	0	2.78073	0.81	2.2666	NA
chr1:140024973..140025014,-	0	0	0	7.42522	2.23074	2.76372	0.977719	0	0.140045	0.480922	0	0	0	0	0	0	0.177537	0	0	0	0	0	0	0	0	0	NA
chr1:140082543..140082548,+	0	0	0	2.90552	1.27471	0.276372	0.733289	0.596357	0.910293	0.480922	0.293608	0.31318	0	0.290428	0	0	0	0	0	1.29664	0	0.119754	0	0	0	0	NA
chr1:140082556..140082557,+	0	0	0	1.04922	0	0	0.24443	0.298179	0.420135	0	0	0	0	0	0	0.233754	0	0	0	0.64832	0	0	0	0	0	0	NA
chr1:140082590..140082597,+	0	0	0	3.38977	0.318678	0.552745	0.977719	0.894536	0.980316	0.480922	0	0	0	0	0	0	0	1.87406	0	0	0	0.119754	0	0	0	0	NA
chr1:140082602..140082620,+	0.193121	0	0.390643	4.03545	1.27471	1.38186	2.19987	1.19271	4.13133	2.88553	2.05525	0.93954	0	0.290428	1.55806	1.16877	0.177537	0	0.469184	0	0	0.119754	0	0	0.405	0.56665	NA
chr1:140082639..140082648,+	0	0.294159	0	4.27757	2.23074	2.48735	0.488859	1.78907	2.31075	1.44276	1.46804	0.31318	0.245807	0.580857	0	0	0	0	0	0	0	0	2.07557	0	0	0.188883	NA
chr1:14013604..14013622,-	1.35184	3.52991	1.56257	1.12992	0.637355	1.38186	1.22215	2.08725	1.05034	0.480922	1.17443	1.5659	2.94969	4.64685	5.71287	8.18138	1.24276	3.74813	5.16102	6.4832	5.10245	2.8741	2.07557	2.78073	2.025	0.755533	NA
chr1:140158018..140158026,-	0	0	0	0	0	0	0	0	0	0	0	0	0	0	0	0	0.355074	0	0	0	0	0.119754	0	0	0	10.9552	Mesenchymal
chr1:140175666..140175710,-	15.2565	20.0028	20.1181	31.3958	14.0218	20.7279	17.8434	18.1889	22.0571	18.275	17.0293	14.0931	13.7652	15.6831	12.4644	13.0902	16.5109	14.9925	17.3598	29.1744	10.2049	15.2088	4.15113	38.9302	32.4	24.1771	NA
chr1:140175712..140175731,-	7.91795	7.05981	5.07836	7.66735	5.09884	5.80382	4.39973	5.36722	6.65214	5.04968	4.69772	7.8295	4.42453	3.77557	5.19352	3.74006	4.26089	3.74813	9.38367	9.7248	0	4.07165	12.4534	19.4651	10.125	6.7998	NA
chr1:140175749..140175769,+	7.14546	10.0014	4.88304	5.48821	1.91207	4.9747	4.64416	3.57814	7.42239	14.4276	18.7909	12.5272	16.9607	13.0693	4.67417	11.9214	10.2971	1.87406	4.69184	8.42816	0	5.14943	2.07557	5.56145	5.265	6.98868	NA
chr1:140332315..140332319,+	0	0	0	0.0807089	0	0.276372	0	0	0	0	0.293608	0	0	0	0	0	0.177537	0	0.938367	0	0	0	0	0	0	0.188883	NA
chr1:140514159..140514164,+	0	0	0	0	0	0	0	0	0.140045	0.240461	0	0.62636	0.245807	1.16171	2.07741	4.44132	2.30798	0	3.28428	0.64832	0	0.359263	0	0	0	0	NA
chr1:140521106..140521111,+	0	0	0	0	0	0	0	0.298179	0.210068	0.240461	0	0.31318	0	0.580857	1.0387	5.37633	2.30798	11.2444	4.22265	1.29664	0	0.119754	0	0	0	0	NA
chr1:141032125..141032132,+	2.12433	3.82407	0.585964	6.61813	1.59339	3.86921	1.95544	3.57814	4.9716	4.56876	4.99133	3.75816	2.21226	2.32343	3.11611	3.0388	3.19566	1.87406	5.16102	2.59328	5.10245	2.03582	4.15113	5.56145	2.835	2.64437	NA
chr1:141032142..141032204,+	102.74	114.134	118.56	232.845	135.438	163.06	153.746	178.311	205.866	204.392	137.408	162.227	156.825	153.927	200.47	166.433	225.649	155.547	284.794	236.637	66.3318	146.938	195.103	147.379	110.97	104.452	NA
chr1:141032235..141032237,+	0.579362	0.294159	0.195321	1.29134	0.956033	0.829117	0.488859	0.298179	0.700226	0.961843	0.293608	0.62636	0.245807	0.290428	0	0.467507	0.710148	0	0	1.29664	0	0.598771	8.30226	0	0	0.56665	NA
chr1:141032367..141032386,+	0.965603	1.17664	1.17193	2.66339	2.23074	2.21098	0.977719	1.49089	2.8009	1.2023	2.93608	3.1318	0.983229	1.45214	2.59676	0.467507	1.4203	0	0.938367	1.29664	0	1.07779	2.07557	0	1.215	0.944416	NA
chr1:141032653..141032671,+	1.73809	1.76495	1.36725	2.66339	4.14281	3.86921	3.91087	2.98179	1.33043	1.2023	3.8169	1.87908	0.737422	1.45214	2.07741	3.5063	2.30798	11.2444	2.8151	0.64832	0	5.86796	0	2.78073	3.24	0.56665	NA
chr1:141038700..141038705,+	2.89681	3.82407	3.51579	1.45276	0	1.10549	1.95544	2.98179	2.66086	1.44276	2.34886	3.1318	2.70388	2.32343	7.27092	6.5451	9.76453	1.87406	9.38367	7.13152	0	3.35312	4.15113	4.17109	4.05	2.07772	NA
chr1:141039267..141039299,-	43.259	50.007	44.1427	2.98623	20.7141	12.1604	8.55504	8.94536	1.68054	4.08783	7.04659	6.57678	5.16195	6.97028	7.27092	6.0776	21.3044	20.6147	5.6302	15.5597	20.4098	5.86796	6.2267	150.159	87.075	36.8322	NA
chr1:141039862..141039868,+	0	0.294159	0.195321	0	0	0	0	0	0.140045	0	0.293608	0.31318	0	0	0.519352	0	0	0	0.469184	0	0	0.359263	0	0	0.81	0	NA
chr1:141041861..141041864,+	0.193121	0	0	0	0	0	0	0	0.0700226	0	0	0	0	0	0	0	0	0	0.469184	0	0	0	0	0	0	0	NA
chr1:141048639..141048652,+	13.9047	11.4722	9.57075	33.8977	16.2526	19.3461	24.6874	39.3596	46.495	23.8056	12.0379	16.2854	10.0781	12.198	14.0225	10.5189	24.145	1.87406	15.0139	8.42816	5.10245	6.10747	10.3778	0	0.405	8.49975	NA
chr1:141219153..141219160,+	0	0	0	3.95474	1.59339	1.65823	1.71101	0	0.210068	0	0.293608	0	0	0.290428	1.0387	0	0	0	0	0.64832	0	0	0	0	0	0	NA
chr1:141220920..141220924,+	0	0	0	1.69489	1.91207	0.276372	0.733289	0.298179	0.0700226	0	0	0	0	0	1.0387	0.233754	0	0	0	0.64832	0	0	0	0	0	0	NA
chr1:141224556..141224558,+	0	0	0	2.25985	0.318678	0.552745	0.488859	0.596357	0.0700226	0	0.293608	0.93954	0	3.19471	1.0387	0	0	1.87406	0	0.64832	0	0	0	0	0.405	0	NA
chr1:141234951..141234959,+	0	0	0	7.18309	3.82413	2.48735	0.733289	1.19271	0.980316	0.240461	0.880823	0	0	0.290428	0.519352	0	0	0	0	0	0	0	0	0	0	0	NA
chr1:141254172..141254174,+	0	0	0	1.45276	1.27471	0	1.22215	0.596357	0.140045	0.480922	1.46804	0.62636	0	2.32343	1.0387	0	0.177537	0	0	0	0	0	0	0	0	0.188883	NA
chr1:14128738..14128762,-	2.89681	1.47079	2.7345	7.34451	2.54942	1.93461	1.22215	4.77086	3.64117	4.08783	0.587216	2.19226	1.72065	2.90428	3.11611	1.87003	6.39133	1.87406	2.34592	2.59328	0	3.11361	0	0	5.67	4.34432	NA
chr1:141573958..141573972,+	0	0	0	4.5197	2.54942	0.276372	0.488859	0	0.210068	0	0.293608	0	0	0	0	0	0	0	0	0	0	0	0	0	0	0	NA
chr1:141614003..141614006,-	0	0	0	1.85631	0.637355	1.38186	0.24443	0	0	0	0	0.31318	0	0	0	0	0	0	0	1.94496	0	0	0	0	0	0	NA
chr1:141729859..141729864,-	0.193121	0	0	23.7284	6.05488	2.76372	2.93316	0.298179	1.47047	1.2023	0	0	0	0	0	0	0	0	0	0	0	0	0	0	0	0	early
chr1:14199127..14199137,-	0	0	0	3.55119	1.27471	0.276372	0.733289	0.894536	1.05034	0.961843	1.17443	0.31318	0.737422	0.871285	0.519352	0.233754	0.177537	0	0	0	0	0	0	9.73254	7.695	0	NA
chr1:14199164..14199173,-	0	0	0	2.90552	0.956033	2.48735	1.46658	2.08725	1.75056	0.480922	0.880823	0	0.491614	0.290428	0	0.467507	0	0	0	0	0	0.119754	0	2.78073	4.455	0	NA
chr1:142026282..142026286,+	0	0	0	0	0	0	0	0	0	0	0	0	0	0	0	0	0	0	0	0	0	0	0	0	0	0	NA
chr1:142088060..142088069,+	0	0	0	0	0	0	0	0	0	0	0	0	0	0	0	0	0	0	0	0	0	0	0	4.17109	7.29	0	NA
chr1:142487922..142487942,-	0	0	0	0	0	0	0	0	0	0	0	0	0	0	0.519352	5.37633	4.26089	9.37031	6.56857	0	0	0	0	95.9351	96.7949	0	NA
chr1:142487959..142487964,-	0	0	0	0	0	0	0	0	0	0	0	0	0	0	0	0.233754	0	1.87406	0.938367	0	0	0	0	15.294	14.58	0	hepatocytes
chr1:142488030..142488043,-	0	0	0	0	0	0	0	0	0	0	0	0	0	0	0	0.233754	0	1.87406	1.87673	0	0	0	0	29.1976	18.225	0	hepatocytes
chr1:14253852..14253896,-	29.3543	25.2977	32.6187	114.526	45.5709	45.6015	41.7975	49.4977	66.1713	51.6991	33.7649	36.3289	24.8265	29.3333	17.658	17.5315	23.0798	5.62219	24.8667	18.8013	15.3073	21.436	18.6801	130.694	123.93	49.4874	NA
chr1:142672028..142672031,-	0	0	0	3.87403	3.82413	3.0401	1.95544	1.49089	0.28009	0	2.34886	0.62636	0	0	3.11611	0	0	0	0	0	0	0	0	0	0	0	NA
chr1:142679572..142679575,-	0	0	0	2.50198	4.14281	1.10549	2.4443	0.298179	0.350113	0.721382	0.293608	0.31318	0	0	0.519352	0	0	0	0	0	0	0	0	0	0	0	NA
chr1:142684219..142684224,-	0	0	0	3.95474	2.23074	1.93461	0.977719	1.19271	0.420135	0.480922	0.293608	0.31318	0	0	1.0387	0	0	0	0	0	0	0	0	0	0	0	NA
chr1:142772042..142772074,-	16.8015	19.4145	24.6105	10.4115	3.82413	6.08019	2.93316	5.36722	4.90158	7.45428	7.92741	7.8295	7.37422	10.7459	12.9838	11.6877	16.3334	37.4813	25.3359	20.7462	15.3073	10.5384	4.15113	31.9784	24.3	20.3994	NA
chr1:142789177..142789194,-	0.579362	3.23575	0.585964	25.0198	8.28562	10.5022	10.7549	8.64718	13.6544	5.77106	7.04659	3.75816	5.16195	5.22771	2.59676	4.67507	3.55074	0	0.938367	2.59328	0	7.0655	0	2.78073	5.265	0.56665	NA
chr1:142789202..142789223,-	1.54497	1.17664	1.17193	11.2992	4.78017	3.86921	5.13302	3.87632	7.98257	4.56876	5.87216	5.95042	3.93291	3.77557	2.59676	5.84384	4.08335	1.87406	1.40755	1.94496	0	4.1914	2.07557	5.56145	2.43	0.944416	NA
chr1:142793239..142793299,+	120.314	165.317	180.477	69.8132	41.4281	76.2788	85.306	110.028	144.597	110.372	55.7855	67.6469	52.3569	59.5378	59.2061	25.7129	60.0075	16.8666	37.0655	60.2938	15.3073	32.6929	53.9647	48.6627	45.36	74.7978	NA
chr1:142793361..142793370,+	1.54497	0.294159	2.34386	2.01772	1.59339	1.10549	1.71101	5.6654	5.25169	4.08783	3.22969	1.87908	2.21226	2.32343	1.55806	0.935015	1.77537	0	0	0	0	1.19754	2.07557	0	0	0.56665	NA
chr1:142811703..142811724,-	4.05553	5.88318	4.88304	10.4115	9.24165	8.29117	9.0439	9.8399	7.21233	7.93521	7.6338	4.07134	6.39099	4.35643	5.71287	5.14258	3.90581	1.87406	2.8151	5.83488	10.2049	8.86182	2.07557	11.1229	10.125	2.64437	NA
chr1:142895420..142895470,-	35.3411	27.6509	38.0877	67.7148	33.1425	46.7069	35.6867	38.1669	60.4295	43.7639	25.8375	28.4994	23.5975	20.33	18.6967	23.3754	21.482	13.1184	15.0139	14.9114	10.2049	27.5435	43.5869	36.1494	29.565	32.299	NA
chr1:142895475..142895484,-	4.6349	4.70654	2.92982	6.45671	3.18678	4.69833	2.93316	4.1745	5.11165	3.12599	2.05525	2.19226	1.72065	2.32343	0.519352	2.57129	3.3732	1.87406	0.938367	3.2416	0	2.39509	4.15113	0	1.215	3.58878	NA
chr1:143016098..143016099,+	0.386241	0	0.390643	0	0	0	0.488859	0	0.0700226	0	0	0.62636	0.737422	1.16171	1.55806	1.63628	1.95291	0	1.40755	0	0	1.07779	2.07557	0	0	0.188883	NA
chr1:143360952..143360955,-	0	0	0	0	0	0	0	0	0	0	0.293608	0	0	0.580857	1.55806	3.5063	1.24276	7.49625	4.69184	0	0	0	0	0	0	0	NA
chr1:143695668..143695696,+	47.7008	12.6488	20.7041	0	0	0	0	0	0	0	0	0	0	0	0	0	0	0	0	0	0	0	0	0	0	0	Aortic
chr1:14374870..14374872,+	3.28305	2.94159	2.7345	1.85631	1.27471	1.10549	0.977719	2.68361	0.490158	0.721382	4.40412	2.50544	4.17872	9.58414	0.519352	2.57129	0.887685	0	1.87673	1.29664	0	2.39509	0	2.78073	1.215	2.2666	NA
chr1:14382096..14382111,-	28.775	48.5362	47.0725	20.5808	9.56033	13.5422	10.7549	11.0326	8.96289	9.37797	14.0932	11.5877	9.09487	11.9076	13.5031	5.84384	8.34424	7.49625	5.6302	20.0979	5.10245	5.26919	6.2267	18.0747	14.175	22.666	NA
chr1:14382114..14382117,-	0.579362	0	1.36725	0.968507	0.956033	0.552745	1.71101	2.08725	1.19038	0.721382	1.76165	0.93954	0.491614	0.871285	1.0387	0.935015	0.710148	1.87406	0	1.29664	0	1.19754	0	0	0.405	0.944416	NA
chr1:143892210..143892280,+	57.3568	67.3624	41.9941	11.0571	6.69223	10.2258	12.9548	17.8907	23.8777	12.504	9.10184	10.6481	8.11164	12.7788	10.387	25.2454	25.2102	3.74813	11.2604	2.59328	0	15.9273	22.8312	36.1494	16.2	16.244	NA
chr1:143950601..143950603,+	11.5872	9.11893	4.10175	0.807089	0.637355	0.276372	0.488859	0.596357	1.05034	1.2023	0.587216	0.31318	0.983229	4.35643	4.15481	0	0.532611	24.3628	47.8567	0	5.10245	1.43705	0	15.294	36.855	4.91097	NA
chr1:143960789..143960805,+	0	0	0	0	0	0	0	0	0	0	0	0	0	0	0	0	0	0	0	0	0	0.119754	0	16.6844	17.415	0	hepatocytes
chr1:143962745..143962750,+	0	0	0	0	0	0	0	0	0	0	0	0	0	0	0	0	0	0	3.28428	0	0	0	0	18.0747	15.39	0	hepatocytes
chr1:143962782..143962789,+	0	0	0	0	0	0	0	0	0	0	0	0	0	0	0	0	0	0	0.938367	0	0	0	0	70.9085	54.675	0	hepatocytes
chr1:143962794..143962806,+	0	0	0	0	0	0	0	0	0	0	0	0	0	0	0	0	0	0	2.8151	0	0	0	0	70.9085	79.38	0	hepatocytes
chr1:143962814..143962834,+	0	0	0.390643	0.0807089	0	0.276372	0	0	0	0	0	0	0	0	0	0	0	3.74813	6.56857	0	0	0	0	303.099	341.01	0	hepatocytes
chr1:143962837..143962858,+	0	0	0	0	0	0	0	0	0	0	0	0	0	0	0	0	0	0	4.22265	0	0	0	0	171.015	140.13	0	hepatocytes
chr1:14408847..14408859,+	1.15872	2.35327	3.71111	0.161418	0	0	0	0	0.630203	0.721382	0.293608	0.31318	0.245807	0.580857	1.55806	0.701261	0.355074	0	0.469184	0	0	0	0	1.39036	0.405	10.5775	NA
chr1:14408863..14408873,+	1.15872	4.11823	3.71111	0.564962	0	0	0.24443	0.894536	0.700226	1.2023	0.587216	0.93954	0.245807	0.290428	0.519352	0.467507	1.06522	1.87406	0.938367	0	0	0	0	0	2.025	8.68863	NA
chr1:144169054..144169064,-	0	0	0	0	0	0	0	0	0	0	0	0	0.737422	0.290428	0.519352	0	0	1.87406	0	0	0	3.11361	2.07557	0	0	0	NA
chr1:144252530..144252566,-	12.746	5.0007	7.2269	20.1772	11.1537	11.884	12.2215	14.9089	19.3262	16.3513	11.7443	13.4667	10.3239	11.0363	14.0225	13.0902	16.866	3.74813	14.0755	11.0214	0	14.131	10.3778	63.9567	49.815	15.2995	NA
chr1:144276588..144276590,-	0	0	0	0	0	0	0	0	0	0	0	0	0	0	0	0	0	0	0	0	0	0	0	0	0	0	NA
chr1:144279350..144279356,+	0	0	0	3.38977	2.8681	2.48735	3.17759	0.596357	0.630203	0.961843	0	0	0.491614	0	0	0	0	0	0	0	0	0.239509	2.07557	0	0	0	NA
chr1:144280729..144280731,-	0	0	0	0	0	0	0	0	0	0.240461	0	0.31318	0.245807	0	0	0.701261	0.177537	0	0	0	0	1.79631	0	0	0	0	NA
chr1:144285210..144285221,-	0	0	0	0.161418	0	0.552745	2.4443	2.98179	6.5121	8.17567	3.52329	3.75816	6.8826	10.165	12.4644	9.5839	10.4747	9.37031	15.4831	0	0	17.3644	20.7557	0	0	0	NA
chr1:144285235..144285248,-	0	0	0	0.242127	0	0	0.24443	0.596357	0.980316	0.721382	0.587216	0.62636	1.47484	0.871285	1.0387	1.16877	0.532611	0	3.28428	0	0	2.63459	4.15113	0	0	0	NA
chr1:144285675..144285680,-	0	0	0	0.0807089	0	0	0	0.298179	0.770248	0.480922	0	0.31318	0.491614	0.290428	1.55806	0.701261	0.355074	1.87406	0	0	0	4.31115	6.2267	0	0	0	NA
chr1:144293902..144293909,+	0	0	0	0.0807089	0	0.276372	0	0	0.28009	0.240461	0.293608	0	0.245807	0	1.0387	0.233754	0.355074	0	0	0	0	5.26919	2.07557	0	0	0	NA
chr1:144293953..144293956,+	0	0	0	0	0	0	0	0.298179	0	0	0	0	0	0.290428	0	0	0	0	0	0	0	2.27533	0	0	0	0	NA
chr1:144295329..144295336,+	0	0	0	0.0807089	0.318678	0	0	0	0.350113	0.240461	0	0	0.737422	1.45214	1.55806	0.701261	0	0	3.75347	0	0	2.99386	2.07557	0	0	0	NA
chr1:144299376..144299378,+	0	0	0	0	0	0	0	0	0.0700226	0	0	0.31318	0.983229	0	0	0.701261	0	0	0	0	0	1.79631	2.07557	0	0	0	NA
chr1:144302353..144302385,+	0	0	0	0	0	0.276372	0	0.298179	1.40045	0.721382	0.880823	0.62636	0.983229	1.45214	0.519352	3.27255	2.30798	0	7.97612	0	0	6.10747	2.07557	0	0	0	NA
chr1:144303503..144303505,+	0	0	0	0	0	0	0	0	0	0	0.293608	0.31318	0	0.871285	1.55806	0	0	0	0.469184	7.77984	0	0	0	0	0	0	NA
chr1:144359319..144359320,+	0	0	0	0	0	0	0	0	0	0	0	0	0	0	0.519352	0	0	5.62219	0	0	5.10245	0.119754	0	0	0	0	NA
chr1:144444893..144444896,-	0	0	0	1.53347	2.8681	0.829117	1.46658	0.596357	0.140045	1.44276	0.880823	0	0.245807	0	0	0	0	0	0	0	0	0.359263	0	0	0	0	NA
chr1:144471998..144472002,+	0	0	0	0	0	0	0	0	0	0	0	0.31318	0	0	1.55806	0	0	1.87406	0.469184	0	0	0	0	0	0	0	NA
chr1:144472023..144472055,-	7.53171	4.70654	3.90643	4.76183	2.8681	6.35657	4.64416	5.6654	8.12262	6.01152	4.99133	6.88996	6.14518	3.48514	7.27092	3.0388	5.32611	5.62219	2.8151	7.13152	5.10245	6.94575	6.2267	34.7591	23.085	2.2666	NA
chr1:144511433..144511472,-	0.965603	3.82407	0.195321	0.645671	0	0.276372	0.733289	1.78907	2.45079	1.44276	2.64247	0.31318	2.45807	3.77557	1.55806	0.935015	0.887685	0	0.469184	1.29664	0	0.83828	2.07557	1.39036	2.43	6.42203	NA
chr1:144511525..144511535,-	1.54497	0	1.17193	1.37205	0	0	1.22215	2.38543	3.43111	2.40461	1.17443	1.5659	0.983229	0.871285	0	0.701261	0.177537	0	0.469184	0.64832	0	0.479017	0	1.39036	1.62	1.51107	NA
chr1:144511590..144511605,-	14.484	11.7664	14.6491	1.45276	1.27471	2.48735	1.95544	5.06904	4.83156	6.97336	4.40412	5.32406	5.89937	5.51814	5.71287	1.16877	2.48552	9.37031	6.56857	10.3731	0	1.91607	6.2267	11.1229	13.365	12.0885	NA
chr1:144511614..144511661,-	104.092	123.253	119.732	14.0434	5.7362	8.84392	18.8211	29.2215	36.8319	43.0425	31.416	33.5103	44.2453	42.9834	46.2223	21.2716	27.1632	16.8666	73.6618	64.1837	35.7171	13.7717	18.6801	112.619	136.08	138.64	NA
chr1:144511678..144511700,-	6.37298	6.17734	7.03157	6.69884	1.59339	2.76372	5.62188	4.77086	6.65214	5.5306	3.52329	5.95042	6.39099	5.51814	3.11611	2.80504	6.56887	1.87406	4.69184	3.2416	5.10245	2.75435	0	11.1229	16.605	6.04426	NA
chr1:144581606..144581607,-	0.386241	0.588318	0	0	0	0	0	0.298179	0.0700226	0	2.64247	0.93954	2.70388	5.22771	0	2.80504	0.177537	0	0	0	0	0	0	0	1.215	0.188883	NA
chr1:144587690..144587703,+	0.579362	0.588318	0.390643	0	0	0	0	0	0	0	1.46804	0.93954	1.72065	6.97028	7.27092	11.9214	15.9783	13.1184	7.03775	7.77984	0	5.02968	6.2267	16.6844	11.34	4.15543	NA
chr1:144645708..144645728,-	9.46291	8.23645	10.938	7.66735	3.18678	11.884	11.9771	13.1199	11.0636	17.7941	15.2676	16.2854	14.9942	15.6831	19.7354	11.6877	9.58699	13.1184	19.2365	21.3946	10.2049	11.6162	14.529	16.6844	12.555	10.7663	NA
chr1:144675093..144675112,+	0.386241	0	0.195321	4.11615	1.27471	2.76372	2.4443	4.47268	5.11165	6.01152	1.17443	1.25272	2.94969	1.16171	2.59676	1.40252	2.66305	3.74813	5.16102	2.59328	5.10245	0.479017	2.07557	6.95182	3.24	1.69995	NA
chr1:144675114..144675137,+	0.386241	0	0.195321	3.30907	2.54942	3.86921	2.68873	2.38543	5.18167	7.93521	1.17443	3.44498	1.22904	2.033	3.63546	0.935015	2.66305	0	7.97612	3.2416	5.10245	0.958034	2.07557	4.17109	2.025	1.32218	NA
chr1:144704442..144704447,+	0	0	0	0	0	0	0	0	0	0	0.587216	0.31318	0	0.871285	1.0387	1.63628	3.3732	1.87406	10.322	1.29664	0	0.359263	2.07557	0	0	0	NA
chr1:144704472..144704483,+	0.386241	0.294159	0	0	0	0	0	0	0	0	0	0.31318	0.983229	0.871285	1.55806	7.24636	12.9602	24.3628	26.2743	5.83488	0	0.359263	0	0	0	0	NA
chr1:144807706..144807712,+	0	0	0	3.47048	1.59339	2.48735	0.977719	1.19271	3.50113	1.68323	4.11051	5.01088	8.11164	0.580857	2.59676	0.233754	0	3.74813	13.1371	2.59328	96.9465	0.239509	0	0	0	0	extraembryonic
chr1:144936347..144936351,-	1.35184	0.588318	1.56257	0.0807089	0	0.552745	0	0.894536	0.490158	0.240461	0.587216	3.1318	4.91614	0.871285	1.0387	3.97381	0.532611	0	0	1.94496	0	3.59263	2.07557	2.78073	2.43	0.944416	NA
chr1:14498349..14498350,+	0	0	0	0	0	0	0	0	0	0	0	0	0	0	1.55806	0	0	0	0.469184	0	0	0	0	0	0	0	NA
chr1:145109287..145109298,-	5.21426	7.05981	9.18011	3.95474	1.59339	1.93461	3.42202	6.55993	9.52307	7.45428	7.34019	7.51632	9.83229	6.38942	11.4257	6.77886	7.45655	1.87406	8.91449	11.6698	0	8.50255	12.4534	6.95182	7.695	6.04426	NA
chr1:145109315..145109331,-	21.2433	36.1816	37.5017	23.4056	9.24165	14.095	15.6435	23.8543	38.7225	38.9546	29.948	41.0266	35.8878	42.4025	61.2835	33.8943	41.3661	9.37031	42.2265	21.3946	20.4098	25.0286	43.5869	55.6145	43.74	23.7993	NA
chr1:145161507..145161528,-	113.169	97.3666	105.669	246.243	148.185	185.17	177.945	172.347	232.545	144.036	123.609	113.058	140.602	116.752	100.235	98.8778	92.8518	50.5997	91.0216	187.365	30.6147	145.382	139.063	80.6411	76.95	84.9975	NA
chr1:145317955..145317970,-	4.6349	3.82407	3.90643	7.02168	1.27471	1.65823	0.733289	1.19271	4.27138	2.64507	1.46804	1.5659	0.245807	0	0.519352	0.467507	2.48552	0	0.938367	0	0	0.83828	2.07557	4.17109	1.215	4.34432	NA
chr1:145317974..145317983,-	4.05553	2.94159	2.34386	2.58269	0.637355	1.65823	0.24443	0.894536	2.31075	0.480922	0.880823	0	1.72065	0.290428	0.519352	0.701261	1.4203	0	0	0	0	0.239509	2.07557	0	0.405	2.45548	NA
chr1:145325492..145325493,+	0	0	0	0	0	0	0	0	0	0	0	0	0	0	0	0	0	1.87406	35.6579	0	0	0	0	0	0	0	late
chr1:145351648..145351652,-	2.12433	6.17734	3.71111	0.645671	1.91207	1.65823	2.68873	0.894536	1.40045	2.40461	6.16576	5.32406	7.62002	7.84157	9.34833	5.61009	2.13044	11.2444	5.6302	5.18656	0	2.8741	8.30226	1.39036	2.025	5.6665	NA
chr1:145404473..145404474,+	1.93121	0.588318	1.56257	1.53347	0.318678	0.552745	1.22215	0.596357	3.99129	3.60691	3.22969	2.19226	1.47484	3.77557	2.07741	1.16877	1.4203	0	1.40755	3.88992	0	2.03582	0	0	0	1.1333	NA
chr1:145426771..145426796,-	16.029	15.0021	13.0865	0.0807089	0	0	0	0	0.350113	0	0.293608	1.5659	0.983229	2.61386	3.63546	5.61009	3.19566	7.49625	7.03775	0.64832	5.10245	0.718526	0	1.39036	8.1	3.3999	NA
chr1:145426797..145426823,-	14.2909	16.4729	18.9462	0	0	0	0.24443	0.596357	0.420135	0.240461	0.293608	0.62636	1.96646	2.32343	2.59676	5.61009	5.14857	9.37031	6.56857	3.2416	0	1.19754	4.15113	15.294	8.505	3.02213	NA
chr1:145441902..145441922,-	6.75922	7.64813	5.85964	4.11615	1.59339	3.86921	3.17759	6.55993	7.1423	9.85889	8.51463	6.88996	5.16195	6.099	6.23222	5.37633	5.14857	13.1184	15.0139	10.3731	5.10245	2.27533	2.07557	5.56145	8.505	9.25528	NA
chr1:145441923..145441952,-	10.2354	16.4729	10.7427	10.7343	3.18678	4.69833	4.39973	8.64718	13.8645	12.504	5.57855	6.88996	5.89937	4.93728	4.67417	3.27255	8.69931	3.74813	10.322	2.59328	0	2.63459	2.07557	25.0265	23.895	12.6552	NA
chr1:14555758..14555766,+	15.0634	26.1801	24.2199	13.8819	5.09884	10.7785	7.33289	4.1745	5.39174	7.21382	8.51463	7.51632	9.09487	9.87457	19.7354	11.4539	15.8008	11.2444	22.0516	25.9328	15.3073	8.50255	6.2267	54.2242	31.995	40.6099	NA
chr1:145828571..145828572,-	0	0	0	0	0	0	0	0	0	0	0	0	0	0	0	0	0	0	0	0	0	0	0	0	0	0	NA
chr1:145871901..145871920,+	5.6005	6.76566	9.37543	2.01772	1.27471	2.48735	2.4443	2.08725	2.94095	2.88553	2.34886	5.01088	3.93291	4.35643	4.15481	3.97381	4.43842	0	3.28428	5.18656	0	6.46673	2.07557	2.78073	0.81	3.96655	NA
chr1:145871931..145871961,+	36.6929	66.1858	60.159	3.06694	0.956033	1.93461	3.17759	4.77086	5.18167	5.29014	6.16576	7.8295	12.0446	5.80857	5.19352	14.4927	11.1848	5.62219	15.4831	5.18656	0	18.2026	8.30226	4.17109	2.835	13.4107	NA
chr1:145952991..145953005,-	0	0	0	17.5138	6.69223	13.8186	8.79947	5.36722	7.00226	6.49244	4.99133	3.1318	3.19549	8.42242	1.55806	0	0	0	0	0	10.2049	0.239509	0	2.78073	3.24	0	NA
chr1:145985020..145985034,-	21.2433	15.8846	20.7041	6.77955	3.18678	2.76372	5.13302	9.24354	14.6347	11.5421	6.45937	4.6977	4.91614	4.93728	2.59676	3.27255	4.7935	1.87406	1.87673	2.59328	0	3.11361	4.15113	9.73254	12.15	15.4884	NA
chr1:145985052..145985094,-	95.981	132.666	145.124	31.4765	18.4833	28.19	34.709	45.3232	66.2414	70.455	49.3261	57.9383	43.7537	38.627	54.5319	26.4142	45.8045	26.2369	97.5902	59.6455	35.7171	19.1607	31.1335	222.458	138.51	96.1416	NA
chr1:145994321..145994326,+	0	0.882477	0.195321	0	0	0	0.24443	0	0	0	0.880823	3.1318	2.45807	1.45214	0.519352	0.467507	0	0	1.40755	2.59328	0	0	0	22.2458	9.71999	0.944416	NA
chr1:145998719..145998733,+	0.386241	0.294159	0	2.90552	2.54942	1.93461	3.17759	3.87632	2.24072	2.64507	1.46804	1.87908	2.21226	2.033	2.07741	1.16877	1.95291	1.87406	1.40755	1.29664	0	2.99386	6.2267	0	0	0.188883	NA
chr1:146127057..146127073,+	5.21426	6.4715	8.39882	5.00395	3.82413	2.76372	3.42202	3.87632	5.04163	4.80922	2.34886	1.5659	1.72065	1.16171	3.11611	2.33754	1.59783	1.87406	7.50694	2.59328	0	2.15558	0	5.56145	3.645	8.49975	NA
chr1:146127082..146127093,+	10.2354	12.3547	21.6807	8.1516	3.18678	3.31647	2.68873	3.57814	5.95192	6.01152	1.76165	0.93954	3.93291	2.033	3.63546	1.63628	1.24276	0	2.8151	0.64832	0	2.03582	4.15113	2.78073	4.455	21.5327	NA
chr1:146418172..146418177,+	0	0	0	0.968507	2.23074	0.829117	0.977719	1.49089	0.980316	2.64507	3.52329	5.63724	3.19549	6.099	9.34833	3.97381	2.13044	5.62219	2.34592	0.64832	0	0.119754	0	0	0	0	NA
chr1:146418367..146418378,+	0.386241	0	0	0.322836	0	0	1.22215	0.894536	1.47047	2.64507	0.587216	3.1318	1.72065	4.93728	6.75157	3.27255	7.10148	3.74813	2.8151	0.64832	0	0	0	0	0	0.56665	NA
chr1:146462009..146462031,-	9.07667	4.70654	9.76607	2.25985	1.27471	2.76372	3.66644	3.87632	6.23201	3.84737	3.52329	5.01088	3.68711	3.48514	4.15481	1.63628	3.72828	1.87406	2.34592	2.59328	0	2.63459	2.07557	9.73254	4.86	5.47761	NA
chr1:146462101..146462144,+	14.8703	8.82477	16.0164	14.3662	8.28562	9.39666	11.4882	12.5235	12.9542	14.6681	17.9101	15.9722	23.3517	16.8448	18.1773	11.4539	11.0073	3.74813	10.7912	23.3395	20.4098	11.0174	14.529	26.4169	17.415	11.8996	NA
chr1:146481723..146481728,+	0	0	0	0	0	0	0	0	0	0	0	0	0	0	0	0	0.177537	0	0	0	0	0	0	1.39036	8.1	0	NA
chr1:146485462..146485467,+	0	0	0	0	0	0	0	0	0.140045	0.240461	5.57855	3.1318	1.72065	4.066	1.55806	2.10378	12.0725	3.74813	1.40755	1.29664	0	0	0	0	0	0	NA
chr1:146860775..146860776,+	0	0	0	0	0	0	0	0	0	0	0	0	0	0	0	0	0.177537	0	0	0	0	0	0	1.39036	6.075	0	NA
chr1:14715710..14715724,+	0	0	0	0	0	0	0	0	0	0	0	0.31318	0	0	0	4.67507	5.85872	1.87406	16.4214	0	0	0	0	0	0	0	late
chr1:147192299..147192301,-	0	0	0	0	0	0.276372	0	0	0	0	0	0	0	0.290428	0	0.467507	0.177537	0	0	0	0	1.91607	0	0	0	0	NA
chr1:147220271..147220273,-	0.193121	0	0	0.0807089	0.637355	0.276372	0	0	0.140045	0.240461	0	0.62636	0	0.871285	1.0387	2.57129	0.355074	0	0	0	0	2.99386	0	0	0	0	NA
chr1:14754100..14754125,-	44.2246	46.4771	46.2912	26.9568	19.1207	26.8081	13.9325	16.1017	25.5582	23.3247	25.2503	27.873	16.9607	19.1683	16.6193	16.5965	26.453	31.8591	30.9661	39.5475	10.2049	18.6817	20.7557	25.0265	20.655	30.2213	NA
chr1:147637641..147637647,-	0	0.294159	0	0	0.318678	0	0	0	0.0700226	0	0	0	0.491614	0	0	0	0.177537	0	0	0	0	3.83214	2.07557	0	0.81	0.188883	NA
chr1:14768853..14768860,+	2.31745	1.47079	4.49239	1.45276	0.637355	1.93461	0	1.78907	1.26041	1.68323	1.17443	0.31318	0	1.16171	0.519352	1.16877	1.24276	1.87406	0	5.18656	0	0.598771	2.07557	1.39036	3.645	1.51107	NA
chr1:14768953..14768987,+	92.5048	83.247	78.7146	26.4725	23.2635	37.863	32.2647	42.3414	51.1165	51.9395	51.3814	44.4716	48.424	47.0494	54.5319	17.5315	19.3515	22.4888	24.8667	79.0951	25.5122	16.0471	16.6045	95.9351	66.825	103.508	NA
chr1:14768994..14769003,+	11.0079	10.8839	8.2035	2.7441	1.27471	2.76372	3.17759	3.27997	4.62149	3.60691	3.52329	5.32406	5.16195	2.32343	4.15481	0.935015	2.13044	0	1.40755	7.77984	5.10245	1.19754	2.07557	6.95182	9.315	15.4884	NA
chr1:14769004..14769011,+	3.47617	5.29486	5.07836	1.45276	0.956033	1.10549	0.977719	0.894536	3.08099	2.40461	1.17443	2.19226	0.491614	1.45214	0	0.233754	1.77537	0	1.40755	2.59328	5.10245	0.119754	0	1.39036	2.025	7.17756	NA
chr1:14769016..14769019,+	1.73809	2.64743	0.781286	0.887798	0.956033	0.276372	0.977719	1.19271	1.26041	0.961843	0.587216	1.87908	1.47484	0.580857	1.0387	0	0.532611	0	0	0.64832	0	0.119754	0	1.39036	2.025	2.2666	NA
chr1:14769053..14769071,+	9.26979	0.882477	15.6257	2.25985	1.27471	1.10549	1.22215	1.78907	3.78122	3.12599	3.22969	1.25272	1.22904	0.871285	3.11611	0.233754	2.30798	0	4.22265	1.94496	5.10245	1.67656	4.15113	5.56145	6.075	13.0329	NA
chr1:14769170..14769177,+	0.386241	0.588318	1.56257	0.322836	0	0.276372	0.488859	0.894536	2.10068	0.480922	0	0.31318	0.737422	0.871285	1.0387	0	0	0	0.469184	0.64832	0	0.359263	0	0	0	1.69995	NA
chr1:14769263..14769284,+	6.37298	11.4722	5.07836	0.564962	0.956033	1.93461	1.71101	2.08725	1.96063	1.44276	2.05525	2.19226	2.21226	1.74257	3.63546	0.467507	1.95291	0	2.8151	1.94496	0	0.598771	0	15.294	9.71999	12.6552	NA
chr1:147784949..147784952,-	0	0	0	0	0	0.552745	0	0	0	0	0	0	0	0.290428	0	0.233754	0	0	0.469184	0	0	2.63459	0	0	0.405	0	NA
chr1:147801648..147801658,-	0	0	0	0	0	0	0	0	0	0	0	0	0	0	0	0	0	0	0	0	0	0	0	6.95182	10.53	0	NA
chr1:147936221..147936237,+	0	0	0	0	0	0	0.24443	0.298179	0.210068	1.2023	3.22969	1.87908	0	2.32343	1.0387	4.20757	14.9131	37.4813	40.3498	2.59328	15.3073	0	0	443.526	354.375	0	NA
chr1:14798097..14798108,+	0	0	0	0.484253	0	0.276372	0.977719	2.98179	7.00226	7.93521	3.22969	3.44498	1.22904	2.90428	0	0.233754	0	0	0	0	0	0	0	0	0	0	NA
chr1:14798118..14798130,+	0	0	0	0.645671	1.91207	0.829117	4.64416	9.8399	16.4553	24.7675	19.0845	11.2745	7.62002	6.38942	3.11611	0	0.177537	0	0.469184	15.5597	0	0	0	0	0	0	NA
chr1:147995887..147995889,+	0	0	0	0	0	0	0	0	0	0	0	0	0	0	0	0	0	0	0	0	0	0	0	0	0	0	NA
chr1:148002767..148002782,-	0.965603	0.294159	0.781286	2.98623	2.54942	1.10549	2.93316	0.596357	2.03065	3.36645	2.05525	1.87908	1.96646	2.32343	1.55806	2.57129	1.59783	11.2444	10.322	1.29664	0	10.1791	8.30226	1.39036	0.81	0.188883	NA
chr1:148002801..148002811,-	0.772483	0.588318	1.56257	0.484253	0	1.10549	0	0.298179	0.490158	0	0.880823	0.93954	1.47484	0.290428	0	0.701261	0.355074	3.74813	2.8151	1.29664	0	2.51484	0	0	0	0	NA
chr1:148023267..148023271,-	0.579362	1.17664	0	0.564962	0.318678	0.552745	0	0.894536	0.420135	0.480922	0	0.62636	0	0.580857	0	0	0.710148	1.87406	0	0.64832	0	1.91607	2.07557	0	0	0	NA
chr1:148027062..148027071,-	9.65603	3.23575	6.05497	36.7226	16.5712	21.0043	26.154	21.4689	23.2475	47.6112	22.9014	23.4885	22.3685	19.4587	21.8128	13.0902	18.4638	5.62219	13.6063	3.2416	5.10245	46.9437	74.7203	6.95182	5.265	8.68863	NA
chr1:14822514..14822533,+	1.15872	0.588318	1.36725	2.01772	0	2.48735	1.46658	1.19271	3.64117	5.29014	1.46804	2.50544	1.22904	0.871285	1.0387	0.467507	0.177537	0	0.469184	0	0	0.958034	2.07557	0	0.405	2.45548	NA
chr1:14822568..14822582,+	3.47617	1.47079	2.53918	10.8957	2.8681	2.76372	2.93316	5.06904	5.04163	6.49244	1.76165	4.07134	1.22904	1.45214	2.07741	2.10378	1.4203	0	0	0.64832	0	2.15558	0	1.39036	1.62	4.15543	NA
chr1:14822600..14822623,+	1.54497	2.05911	1.17193	9.36223	4.14281	4.14559	3.42202	5.96357	4.3414	3.84737	0.880823	2.50544	1.47484	1.74257	2.59676	1.87003	0.710148	0	0	3.88992	0	2.39509	0	1.39036	0.405	1.88883	NA
chr1:14822780..14822810,+	16.029	19.7087	18.7509	159.239	63.4169	54.9981	43.0196	37.8687	47.5453	30.5385	21.727	21.6094	16.2233	15.3927	21.8128	17.2978	24.5001	9.37031	9.38367	14.263	0	19.0409	8.30226	13.9036	13.365	17.9439	NA
chr1:14825117..14825128,+	0.193121	0.588318	0.195321	3.71261	1.27471	0.829117	0	0.298179	1.33043	0.961843	0.587216	0.31318	0	0	0.519352	0.233754	0	0	0	0	0	0.119754	0	0	0	0	NA
chr1:14825995..14826000,+	1.35184	0.294159	0.781286	4.84253	4.46149	2.76372	5.13302	5.06904	2.87093	4.32829	0.587216	1.25272	1.47484	0.580857	1.55806	0.701261	0.532611	0	0.469184	2.59328	0	2.03582	4.15113	1.39036	0	0.188883	NA
chr1:14846245..14846250,-	0	0	0	0	0	0	0	0	0.0700226	0.480922	33.4713	38.5212	87.999	74.6401	62.8416	0	0	1.87406	9.85285	67.4253	112.254	0	0	0	0	0	NA
chr1:14867076..14867079,+	0.193121	0.294159	0.585964	2.98623	0.318678	0.552745	0.488859	1.19271	1.61052	1.2023	0.293608	1.25272	0.491614	0	0	0.233754	0	0	0	0	0	0.119754	0	0	2.025	0.377767	NA
chr1:14867080..14867155,+	44.4177	44.418	47.2678	107.666	57.6807	73.5151	65.0183	70.072	108.115	108.448	70.7595	81.4268	63.4183	65.3464	50.3771	32.258	47.2248	18.7406	65.2165	51.8656	5.10245	45.3869	26.9823	247.485	203.715	59.3093	NA
chr1:14867170..14867176,+	0.386241	0	0.585964	3.6319	2.23074	2.21098	1.46658	1.49089	2.8009	3.12599	2.34886	2.19226	2.94969	2.32343	1.55806	0.233754	0.355074	0	1.40755	2.59328	0	0.359263	0	1.39036	3.24	0.377767	NA
chr1:14893523..14893534,+	0	0	0	0	0	0	0	0	0	0	0	0	0	0	0	0	0	1.87406	0	0	0	0	0	0	0	0	NA
chr1:1490679..1490680,+	0	0	0	0	0	0	0	0	0	0	0	0	0	0	0.519352	0.701261	0.177537	0	0	12.9664	0	0	0	0	0	0	extraembryonic
chr1:14922458..14922464,+	0	0	0	1.69489	1.59339	0.552745	0.24443	0	0.420135	0.721382	0.293608	0	0	0	0	0	0.177537	0	0	0	0	0.119754	0	0	0	0	NA
chr1:14923246..14923325,-	5.21426	20.5911	6.25029	137.367	57.9993	72.686	76.0176	86.4718	105.734	134.899	68.7042	92.7013	99.0603	74.0592	86.7317	34.5955	66.7539	46.8516	60.9939	99.193	15.3073	18.6817	22.8312	2.78073	1.215	5.6665	NA
chr1:14923397..14923412,-	0.386241	2.05911	1.17193	6.2953	2.8681	2.76372	6.35517	5.96357	9.24298	6.97336	3.22969	4.07134	3.4413	2.90428	4.15481	1.63628	5.14857	0	1.87673	0	0	2.8741	2.07557	0	0	0.56665	NA
chr1:14923545..14923582,-	0	0	0	13.3977	14.0218	13.5422	17.8434	19.6798	26.3285	34.8668	29.0672	29.1257	22.3685	11.3267	16.0999	2.80504	2.13044	1.87406	1.87673	13.6147	0	1.3173	0	0	0	0	NA
chr1:14923588..14923612,-	0	0.294159	0	7.66735	7.96694	9.94941	14.6658	13.7162	18.0658	12.2635	14.3868	10.9613	14.011	4.93728	7.27092	1.40252	1.4203	0	0.469184	5.83488	0	1.19754	2.07557	0	0	0.377767	NA
chr1:149293451..149293462,+	0	0	0	3.95474	2.8681	2.76372	0.733289	0	0	0	0	0	0	0	0	0	0	0	0	0	0	0	0	0	0	0	NA
chr1:149402786..149402793,+	1.93121	0.588318	2.14854	2.17914	0	1.10549	1.95544	1.49089	1.75056	0	0.880823	0.31318	0.491614	1.16171	0	0.233754	0.177537	0	0.469184	0	0	0.359263	0	1.39036	0.405	1.51107	NA
chr1:14969853..14969874,-	0	0	0	0	0	0	0	0	0	0	0	0	1.22904	2.61386	4.15481	16.5965	5.50364	1.87406	0.469184	4.53824	0	6.22722	2.07557	0	0	0	middle_late
chr1:14978499..14978532,+	7.33858	3.52991	3.32047	5.00395	2.54942	4.14559	4.64416	5.96357	9.38303	7.45428	8.80823	7.8295	7.12841	8.71285	10.9064	12.8565	6.56887	5.62219	14.5447	5.83488	40.8196	8.26305	8.30226	15.294	10.125	4.72208	NA
chr1:14978535..14978549,+	9.65603	3.82407	3.32047	5.24608	2.8681	4.9747	5.62188	5.06904	8.47273	6.49244	9.68906	7.8295	6.39099	2.90428	7.79028	4.20757	2.48552	0	7.97612	5.18656	15.3073	6.34698	14.529	11.1229	7.29	3.02213	NA
chr1:14980267..14980313,+	29.7406	31.1808	25.0012	25.4233	10.835	15.7532	16.3768	14.0144	28.8493	19.2369	10.5699	10.6481	9.58648	7.26071	9.34833	5.61009	11.0073	1.87406	6.09939	3.2416	10.2049	11.4964	6.2267	20.8554	17.01	24.9326	NA
chr1:150234298..150234303,+	0	0	0	10.9764	1.91207	0	0.24443	0	0.28009	0	0	0	0	0	0	0	0	0	0	0.64832	0	0	0	0	0	0	early
chr1:150248838..150248848,+	0.386241	0.294159	0.195321	0.0807089	0	0.276372	0	0	0	0	0	0.62636	1.47484	2.033	4.67417	5.84384	7.63409	5.62219	5.16102	2.59328	0	1.43705	0	0	0	0	NA
chr1:150248875..150248885,+	0.386241	0	0.195321	0	0	0	0	0	0.0700226	0.240461	0	0	0.245807	1.45214	3.63546	2.10378	6.56887	5.62219	4.22265	5.83488	0	1.3173	2.07557	0	0.81	0	NA
chr1:150363718..150363756,-	0	0	0	7.02168	1.27471	0.829117	0.24443	0.298179	0.140045	0.240461	0	0	0.245807	2.033	2.59676	0	0	0	0	1.29664	0	0	0	0	0	0	NA
chr1:15042445..15042448,+	0	0	0	0	0	0	0	0	0	0	0	0	0	0	3.11611	0	0	39.3553	1.40755	0	5.10245	0	0	0	0	0	late
chr1:150614402..150614418,-	0	0	0	5.00395	1.91207	0.552745	0.488859	0.298179	0.140045	0.240461	0	0.31318	0	0.871285	0	0	0	0	0	1.29664	0	0	0	0	0	0	NA
chr1:15072206..15072208,-	0	0	0	0.0807089	0	0	0	0	0	0	0	0	0	0	0	0	0	0	0	0	0	0	0	0	0	0	NA
chr1:150814263..150814267,+	0	0	0	7.82876	2.8681	1.65823	0.488859	0.298179	0	0.240461	0.293608	0	0.245807	1.45214	1.0387	0.701261	0.177537	0	0	0.64832	0	0	0	0	0	0	NA
chr1:151209678..151209687,+	0	0	0	0.0807089	0	0	0.24443	0	0	0	0	0.31318	0	0	2.07741	0.233754	0.355074	0	0.938367	8.42816	0	0	0	0	0	0	NA
chr1:151210260..151210263,+	0	0	0.195321	0.242127	0	0.552745	0.24443	0	0	0	0	0	0	0.580857	3.11611	8.41513	4.61596	14.9925	10.322	0	0	0.119754	0	0	0	0	late
chr1:15159000..15159004,+	1.54497	1.76495	0.781286	0.403545	0.318678	1.10549	0.733289	0.596357	1.05034	1.68323	3.22969	2.19226	2.45807	1.45214	2.07741	3.97381	0.887685	5.62219	2.34592	4.53824	0	3.47287	0	1.39036	0.405	1.51107	NA
chr1:151784876..151784896,+	12.9391	8.53061	20.8994	0.242127	0.318678	0	0	1.19271	0.910293	0.961843	0	0.31318	0.983229	0.290428	0.519352	1.16877	0.532611	1.87406	0.469184	3.2416	0	0	0	0	0	1.32218	NA
chr1:151784898..151784909,+	5.40738	3.23575	7.81286	0.242127	0	0	0	0.298179	0.140045	0	0	0	0.491614	0.290428	1.0387	0.701261	0.710148	0	0.938367	2.59328	0	0	0	0	0	0.377767	NA
chr1:151926448..151926473,+	13.5184	10.0014	10.7427	11.2185	9.56033	12.4368	12.7103	12.2253	10.1533	2.88553	2.64247	3.1318	6.39099	2.61386	1.55806	2.57129	2.66305	1.87406	0.938367	1.94496	0	0.83828	0	5.56145	16.2	10.3886	NA
chr1:152619389..152619419,+	4.24865	2.35327	2.92982	0.968507	1.27471	1.10549	0.733289	0.894536	0.210068	0.480922	1.76165	1.5659	2.70388	3.19471	6.23222	3.27255	0.532611	9.37031	7.03775	4.53824	5.10245	2.39509	2.07557	1.39036	1.62	3.02213	NA
chr1:152668002..152668010,-	0	0	0	10.7343	5.09884	5.25108	4.88859	2.68361	1.61052	5.77106	0.587216	1.5659	0.245807	0	1.0387	0	0	0	0	0	0	1.91607	2.07557	0	0	0	NA
chr1:152668857..152668860,+	0	0	0	2.42127	0	0.276372	0	0.298179	0	0	0.293608	0.31318	0	0	0.519352	0.233754	0.887685	1.87406	0	0	0	0.359263	0	0	0	0	NA
chr1:152668898..152668946,+	0	0.882477	0.195321	4.84253	1.91207	2.21098	1.22215	1.19271	0.490158	0.240461	1.17443	0.31318	0.983229	0.290428	1.55806	0.233754	2.66305	0	0	1.29664	0	0.598771	2.07557	1.39036	0	0	NA
chr1:152669175..152669225,+	5.98674	2.35327	7.2269	59.8053	28.3623	30.401	19.0655	31.0106	17.4356	16.1109	13.2124	13.1536	10.3239	10.165	20.7741	47.452	34.0871	26.2369	36.5963	12.3181	5.10245	39.0399	49.8136	4.17109	3.24	1.32218	NA
chr1:152669284..152669298,+	1.15872	0.882477	2.14854	2.50198	2.23074	1.65823	0.977719	3.57814	2.8009	2.16415	4.40412	2.19226	2.45807	2.32343	4.67417	15.8952	19.7066	0	7.03775	3.88992	0	12.0952	10.3778	0	0.81	0.377767	NA
chr1:152669316..152669331,+	0.386241	0.882477	0.976607	3.47048	0.637355	1.10549	0.24443	0.596357	1.68054	3.36645	1.76165	1.87908	1.96646	2.32343	0.519352	8.88264	13.4928	0	3.75347	0.64832	0	13.173	6.2267	0	0	0.755533	NA
chr1:152670026..152670027,+	7.72483	3.23575	6.83625	5.32679	6.05488	9.94941	5.62188	5.96357	1.33043	4.80922	7.6338	5.32406	4.42453	8.71285	13.5031	28.2842	17.9312	1.87406	11.2604	2.59328	0	31.8546	49.8136	5.56145	1.215	2.2666	NA
chr1:152671725..152671745,+	1.15872	0.294159	0.976607	2.09843	0.956033	1.93461	0.733289	1.49089	0.490158	0.240461	0	0.31318	0.491614	0.290428	0	3.27255	3.01813	0	1.40755	0.64832	0	1.19754	0	0	0	0	NA
chr1:152678424..152678431,+	0.386241	0	0.195321	0.0807089	0	0	0	0	0	0.240461	0.293608	0	0.737422	0.290428	1.55806	1.63628	1.06522	1.87406	0	0.64832	0	5.74821	0	0	0	0.188883	NA
chr1:152758626..152758627,-	0	0	0	0	0	0	0	0	0	0	0	0	0	0	0	0	0	0	0	0	0	0	0	0	0	0	NA
chr1:15281022..15281036,+	3.47617	2.35327	7.42222	1.93701	1.27471	1.10549	1.22215	0.596357	2.38077	3.60691	7.04659	8.76904	8.84906	3.77557	9.86768	1.87003	3.3732	9.37031	16.8906	12.9664	25.5122	1.3173	0	177.967	152.685	43.8209	hepatocytes
chr1:153016835..153016839,-	0	0	0	0	0.318678	0.829117	0.24443	0.298179	0	0.480922	0.293608	0.93954	0.245807	0	0.519352	3.0388	0.177537	1.87406	0	0	0	4.55066	0	0	0.405	0	NA
chr1:153069244..153069269,-	8.69043	20.0028	12.8912	7.58664	1.27471	3.86921	1.95544	4.1745	5.74185	6.97336	15.2676	23.1753	15.4859	13.9406	12.9838	9.11639	8.69931	13.1184	15.9522	16.8563	5.10245	6.10747	4.15113	16.6844	13.365	11.1441	NA
chr1:153111193..153111237,+	38.6241	41.7706	40.8222	229.294	101.658	135.699	132.481	138.653	163.293	195.735	127.132	116.816	127.328	120.818	155.286	122.487	113.801	155.547	119.642	241.823	76.5367	121.91	126.609	62.5663	57.51	82.1642	NA
chr1:153111249..153111256,+	0.965603	0.882477	1.95321	12.5099	4.14281	8.56755	6.84403	5.96357	8.75282	12.7444	5.87216	6.2636	6.8826	3.19471	4.67417	6.31135	2.66305	0	3.28428	5.83488	0	8.62231	6.2267	0	0.405	1.51107	NA
chr1:153118040..153118059,+	21.2433	43.2414	31.4468	1.12992	20.7141	11.0549	5.86631	12.2253	0.840271	6.49244	10.8635	9.70858	8.35744	12.7788	11.4257	8.88264	20.2392	20.6147	10.322	18.153	20.4098	7.42477	16.6045	166.844	74.52	22.2882	NA
chr1:153124887..153124902,+	0.386241	0.588318	0.390643	2.7441	0.956033	2.48735	2.4443	2.38543	2.10068	0.480922	1.17443	0.93954	0.245807	0	0.519352	0.467507	0.887685	1.87406	0	0.64832	0	1.19754	0	0	0.81	0.377767	NA
chr1:153159381..153159397,+	1.15872	0.588318	0.195321	0.72638	2.23074	5.25108	5.62188	1.49089	0.700226	4.32829	15.2676	9.08222	8.11164	6.099	6.75157	15.194	1.4203	16.8666	5.16102	9.07648	0	15.3285	26.9823	0	0	0.188883	NA
chr1:153159409..153159418,+	0.386241	0.588318	0.195321	0.322836	0.956033	1.10549	0.977719	0	0.140045	0.480922	1.46804	5.95042	0.491614	0.871285	1.0387	2.57129	0.532611	1.87406	0.469184	1.29664	0	3.71238	6.2267	0	0.81	0	NA
chr1:153159439..153159450,+	1.15872	0.588318	3.12514	1.45276	4.46149	6.63294	4.39973	1.78907	0.980316	2.16415	9.98266	20.3567	6.8826	7.26071	5.19352	11.2202	4.97103	5.62219	2.8151	4.53824	0	15.9273	10.3778	1.39036	1.62	2.07772	NA
chr1:153159458..153159482,+	2.70369	4.41238	2.7345	1.61418	2.54942	4.14559	4.39973	1.49089	0.210068	5.77106	8.51463	16.5985	5.40776	4.066	4.15481	9.35015	2.66305	5.62219	1.87673	3.2416	0	15.089	16.6045	2.78073	1.62	3.96655	NA
chr1:153160474..153160478,+	0.386241	0.882477	2.53918	0.484253	0.637355	1.10549	1.71101	1.49089	0.910293	0.961843	0.880823	1.25272	1.47484	2.61386	3.63546	2.33754	0	0	0.469184	4.53824	0	2.27533	2.07557	0	0	0.944416	NA
chr1:153477282..153477283,+	0	0	0	0	0	0	0	0	0	0	0	0	0	0	0	0	0	0	0	0	0	0	0	0	0	0	NA
chr1:153499600..153499607,+	0.579362	0.588318	0.390643	1.69489	1.59339	1.93461	1.46658	1.19271	1.33043	0.721382	0.880823	2.19226	0.737422	3.19471	1.0387	1.16877	1.59783	3.74813	1.40755	1.94496	0	1.79631	0	0	0	0.56665	NA
chr1:153499642..153499683,+	18.3465	12.3547	14.0631	32.6064	20.3954	32.6119	28.1094	21.767	22.9674	26.9316	26.7183	29.7521	19.4188	27.3003	31.1611	22.2066	26.453	41.2294	40.819	26.5811	10.2049	28.3818	29.0579	9.73254	8.505	15.2995	NA
chr1:153499791..153499803,+	10.8148	9.41309	7.03157	3.79332	1.59339	1.65823	4.88859	2.68361	7.42239	9.13751	9.68906	10.9613	10.5697	7.55114	2.07741	3.74006	4.08335	1.87406	3.28428	7.77984	5.10245	2.75435	4.15113	1.39036	4.455	4.15543	NA
chr1:15351030..15351049,+	0	0	0.195321	7.82876	3.82413	4.14559	5.13302	3.57814	6.58212	7.21382	8.51463	6.2636	3.68711	4.64685	4.15481	21.2716	14.203	13.1184	22.99	1.29664	0	10.5384	6.2267	16.6844	36.855	8.87751	NA
chr1:153534300..153534325,+	3.28305	0.294159	2.14854	9.68507	2.23074	1.65823	0.733289	0.596357	5.46176	1.92369	0.587216	0.31318	0.983229	0.871285	3.63546	6.77886	3.55074	3.74813	3.28428	0.64832	0	0.718526	4.15113	0	0	1.69995	NA
chr1:153534541..153534545,+	0	0	0	2.7441	0.318678	0.829117	1.22215	0.298179	0.490158	0.721382	0.293608	0.31318	0	0	0	0	0	0	0	0	0	0.119754	0	0	0	0	NA
chr1:153536676..153536678,-	0	0	0	0	0	0	0	0	0	0	0	0	0	0	0	0	0	0	0	0	0	0	0	0	0	0	NA
chr1:153666161..153666162,-	0	0	0	0	0	0	0	0	0	0	0	0	0	0	0	0	0	0	0	0	0	0	0	0	0	0	NA
chr1:153712802..153712806,-	0	0	0	0	0	0	0	0	0	0	0.293608	0	0.245807	0.871285	14.0225	6.0776	0.532611	13.1184	3.28428	217.187	5.10245	0	2.07557	0	0	0	NA
chr1:153741331..153741337,-	0	0	0	0	0	0	0	0	0	0	0	0	0	0	0	0	0	0	0	0	0	0	0	0	0	3.3999	NA
chr1:153918024..153918062,+	0	0.294159	0	1.45276	0.956033	8.84392	13.9325	25.3452	12.6041	17.7941	19.6717	25.3676	58.2563	53.1484	62.3222	21.5053	20.7718	7.49625	28.151	47.3274	0	0.598771	0	18.0747	17.82	0	NA
chr1:154045041..154045044,+	0	0	0	0	0	0	0	0	0	0	0	0	0	0	0	0.233754	0	0	0	0	0	0	0	0	0	0	NA
chr1:154113577..154113591,-	0.965603	5.29486	1.75789	30.2658	2.23074	3.86921	0.733289	0.894536	2.66086	4.56876	12.3315	18.1644	20.8936	29.9141	19.216	3.5063	19.174	80.5847	27.6818	46.6791	35.7171	10.1791	12.4534	0	0	0	NA
chr1:154136414..154136426,-	13.1322	0.294159	1.56257	0	0	0	0	0	0	0	0	0	0	0	0	0	0.177537	0	0	0	0	0	0	0	0	0	NA
chr1:154216798..154216859,+	13.1322	15.2963	14.8444	24.2127	8.92298	14.3714	10.5105	10.7344	15.475	20.4392	18.7909	14.0931	13.5194	12.7788	20.2547	15.4277	17.5762	5.62219	12.668	23.3395	0	8.98157	10.3778	12.5133	5.265	15.8662	NA
chr1:154216886..154216895,+	0.579362	1.76495	1.56257	1.61418	0.318678	0.829117	0.488859	0	0.980316	0.721382	0.880823	1.25272	1.22904	0.871285	2.07741	0.935015	1.06522	0	1.87673	2.59328	0	0.958034	0	2.78073	0.405	4.15543	NA
chr1:154216899..154216917,+	3.28305	2.05911	2.92982	4.19686	3.50545	2.76372	1.22215	2.08725	2.24072	3.12599	4.69772	3.44498	3.19549	3.19471	3.11611	1.40252	2.13044	0	0.938367	3.2416	0	1.3173	4.15113	1.39036	1.62	16.244	NA
chr1:154217221..154217232,+	0.965603	2.05911	1.56257	4.19686	2.23074	1.38186	0.733289	0.596357	2.31075	3.60691	1.17443	1.87908	1.22904	2.32343	2.59676	0.701261	1.24276	1.87406	5.16102	1.29664	0	0.83828	2.07557	2.78073	2.025	1.88883	NA
chr1:154217234..154217264,+	3.66929	6.17734	5.85964	10.815	2.23074	2.76372	3.91087	2.38543	4.55147	10.3398	3.52329	4.38452	1.96646	3.48514	5.19352	3.97381	3.55074	1.87406	7.97612	6.4832	15.3073	1.19754	0	4.17109	3.24	8.49975	NA
chr1:15436959..15436963,+	0	0	0	0	0	0	0	0	0	0	0	0	0	0	0	0	0	3.74813	8.91449	0	0	0	0	0	0	0	NA
chr1:15438047..15438054,+	0	0	0	0	0	0	0	0	0	0	1.76165	1.87908	7.12841	11.6171	7.27092	0.233754	0	0	0	0.64832	0	0	0	0	0	0	middle
chr1:154436564..154436600,+	5.6005	9.11893	8.39882	16.7067	3.50545	6.35657	4.64416	4.1745	6.65214	12.023	8.80823	6.2636	8.60325	10.4554	10.9064	9.11639	12.0725	0	19.2365	12.3181	5.10245	4.79017	2.07557	2.78073	11.745	12.2774	NA
chr1:154467723..154467738,-	10.2354	10.5897	13.0865	3.06694	2.8681	4.9747	3.66644	5.06904	7.28235	7.45428	11.1571	19.104	13.7652	14.231	11.9451	4.90883	9.05438	9.37031	14.0755	20.0979	15.3073	2.39509	2.07557	40.3205	31.995	32.4879	NA
chr1:154467747..154467759,-	4.24865	2.64743	5.07836	2.09843	0.637355	1.10549	1.71101	4.47268	3.85124	2.40461	2.34886	0.62636	3.93291	2.32343	1.0387	0.467507	0.532611	0	0	0	0	0.958034	0	6.95182	4.455	6.04426	NA
chr1:154473445..154473499,+	67.206	50.3012	56.6432	16.626	11.7911	14.3714	19.7988	22.6616	24.0177	48.3326	33.4713	41.653	65.1389	58.0857	43.1062	31.5567	49.0002	14.9925	79.7612	42.1408	35.7171	20.7175	16.6045	62.5663	65.205	37.21	NA
chr1:154473504..154473544,+	27.23	26.1801	21.4854	7.18309	7.64827	8.56755	10.266	13.7162	9.10293	19.7178	19.9653	35.3894	47.195	44.1451	54.5319	33.6605	26.9856	39.3553	89.6141	64.832	40.8196	21.915	29.0579	38.9302	30.375	20.0216	NA
chr1:154518714..154518722,+	0	0	0	0	0	0	0	0	0	0	0	0	0	0	0	0	0	193.028	5.16102	0	0	0	0	0	0	0	late
chr1:154526224..154526238,+	0.579362	0	0.976607	0.161418	0.637355	0	0.733289	1.19271	0.28009	0	4.40412	6.88996	15.7317	11.0363	19.7354	19.4016	56.2792	5.62219	21.1133	13.6147	0	0.718526	0	1.39036	1.215	155.073	NA
chr1:15470399..15470401,-	0	0	0	0	0	0	0	0	0	0	0	0	0.245807	0.290428	2.59676	0.701261	0	1.87406	0	11.0214	0	0	0	0	0	0	extraembryonic
chr1:154807170..154807171,+	0	0	0	0	0	0	0	0	0	0	0	0	0	0	0	0	0	0	0	0	0	0	0	0	0	0	NA
chr1:154908884..154908889,-	3.28305	1.76495	5.85964	0.0807089	0	0	0	0	0	0	0	0	0	0	0.519352	0	0	0	0	0	0	0	0	0	0	0.377767	NA
chr1:154939573..154939600,-	0.193121	0.294159	0.585964	0	0	0	0	0	0.0700226	0.480922	2.34886	1.25272	2.70388	3.19471	2.07741	0	1.59783	14.9925	18.2982	5.83488	15.3073	0	0	30.588	46.575	0	late
chr1:154939719..154939733,-	19.8914	47.0654	39.8456	0.161418	0	0	0	0	0.28009	0.480922	3.22969	0.93954	4.17872	4.35643	5.71287	2.57129	6.56887	33.7331	22.5208	14.263	35.7171	0.479017	0	47.2724	41.715	0.377767	late
chr1:154939787..154939794,-	3.86241	5.88318	10.938	0	0	0	0	0	0	0	0	0	0	0	0	0	0.532611	0	2.34592	0	0	0.119754	0	0	0	0	NA
chr1:154996445..154996457,-	43.0659	45.0063	28.1263	1.7756	0.637355	0.829117	0.488859	5.6654	10.8535	5.5306	3.8169	5.95042	2.94969	5.22771	3.11611	9.81765	14.7356	1.87406	4.22265	0.64832	0	1.19754	2.07557	0	0	1.32218	NA
chr1:154996573..154996605,-	0.965603	1.47079	0.585964	2.09843	0	0.276372	1.22215	2.38543	3.78122	2.88553	2.05525	1.25272	1.96646	1.74257	0.519352	0.701261	0.532611	1.87406	0	2.59328	0	0.598771	0	0	0	0.377767	NA
chr1:155043609..155043632,-	231.938	170.906	183.602	176.672	115.361	141.226	135.903	175.627	217.98	161.109	139.757	122.767	97.0938	85.3859	66.477	87.1901	66.0437	69.3403	34.7196	70.6669	30.6147	173.883	161.894	61.176	66.825	121.641	NA
chr1:155043649..155043656,-	15.2565	12.0605	10.938	6.13388	4.14281	4.14559	5.13302	7.15629	11.8338	6.01152	7.34019	9.70858	7.12841	5.22771	5.71287	5.61009	3.55074	0	2.34592	1.29664	0	4.43091	6.2267	2.78073	4.455	8.31086	NA
chr1:155043755..155043764,-	0	0	0	2.01772	0.318678	1.38186	1.46658	1.19271	0.210068	0.480922	0	0	0	0	0	0	0	0	0.469184	0	0	0	0	0	0	0	NA
chr1:155043799..155043808,-	0.772483	0.588318	0.195321	3.47048	1.59339	0.552745	1.46658	0.596357	1.40045	1.2023	0.293608	0.93954	0	0.871285	0.519352	0.701261	0.532611	0	0.938367	0.64832	0	0.598771	2.07557	0	0	0	NA
chr1:155063052..155063096,+	62.5711	36.7699	34.7672	35.3505	16.8899	25.4263	22.9764	28.0288	42.2936	25.2484	40.2243	37.8948	36.3795	28.7524	44.1449	36.6993	41.7212	33.7331	38.9422	35.6576	35.7171	50.7758	43.5869	52.8338	49.41	50.4318	NA
chr1:155063377..155063379,-	0.193121	0	0.390643	0.242127	0	0.276372	0.24443	0	0.910293	0.240461	0.880823	0.31318	0.491614	0.580857	1.0387	0.233754	0	0	0.469184	1.29664	0	1.91607	4.15113	0	0	0	NA
chr1:15507201..15507218,+	4.05553	1.47079	2.7345	0.161418	0	0.552745	0.24443	1.19271	0.630203	0.961843	0.587216	0.93954	1.96646	1.45214	1.0387	1.87003	1.4203	1.87406	3.75347	2.59328	0	0.479017	0	8.34218	7.29	13.7885	NA
chr1:15507233..15507247,+	4.24865	1.47079	1.95321	0.0807089	0	0.276372	0	0.596357	0.490158	0.480922	0.587216	0.62636	0	0.871285	0.519352	1.16877	0.532611	0	1.87673	0.64832	0	0.718526	0	6.95182	5.265	13.9774	NA
chr1:155081378..155081379,+	0	0.294159	0	0.242127	0.318678	0	0.24443	0	0.770248	0.240461	0	0.31318	0	0.290428	0.519352	0.467507	0	0	1.87673	2.59328	0	0.119754	0	0	0	0.377767	NA
chr1:155081393..155081407,+	2.31745	1.76495	2.34386	15.254	6.69223	4.69833	5.62188	6.55993	9.03291	8.89705	7.92741	9.3954	5.65357	4.64685	8.30963	10.2852	15.6233	13.1184	30.4969	34.361	10.2049	3.23337	2.07557	0	2.43	1.69995	NA
chr1:155258930..155258935,-	0	0	0	4.27757	0.318678	0.552745	0	0	0	0	0	0	0	0	0	0	0	0	0	0	0	0	0	0	0	0	NA
chr1:155477243..155477254,+	0	0	0	0	0	0	0	0	0	0	0	0	0	0	0	0	0	0	0	0	0	0	0	0	0	16.4328	Mesenchymal
chr1:155477273..155477284,+	0	0	0	0	0	0	0	0	0	0	0	0	0	0	0	0	0	0	0	0	0	0	0	0	0	18.5106	Mesenchymal
chr1:155608778..155608800,+	0.772483	1.17664	0	5.64962	1.91207	2.76372	3.66644	5.36722	8.0526	7.21382	1.46804	3.1318	2.94969	3.19471	0	2.10378	6.92394	0	0	0	0	1.79631	4.15113	6.95182	5.67	5.09985	NA
chr1:155608817..155608851,+	0.965603	0.882477	0.585964	12.0256	10.1977	14.9241	8.31061	9.24354	14.6347	16.8323	6.75298	9.70858	4.42453	4.93728	6.23222	14.4927	15.2682	0	9.38367	5.18656	0	12.3347	16.6045	25.0265	25.92	8.12198	NA
chr1:155608880..155608893,+	0	0	0	2.7441	0.956033	1.93461	0.733289	1.49089	1.19038	2.64507	1.17443	0.62636	0.737422	2.033	1.0387	1.40252	2.48552	0	1.40755	0	0	1.19754	2.07557	2.78073	0.405	0	NA
chr1:155796655..155796663,+	0	0	0	0.242127	0.956033	0.276372	0.488859	0	0.140045	0.721382	1.46804	0.31318	1.72065	1.74257	2.07741	1.16877	0.887685	0	3.28428	0.64832	0	3.59263	0	0	0.81	1.51107	NA
chr1:155809523..155809525,+	0	0	0	0.161418	0.318678	0.276372	0.733289	0.596357	0.210068	0	1.17443	0.62636	0.983229	0	0.519352	0.467507	0	1.87406	0	0	0	1.79631	2.07557	2.78073	1.215	0.944416	NA
chr1:155974742..155974758,-	0	0	0	0	0	0	0	0	0.0700226	0	0	0	0	0	0	0	0	0	0	0	0	0	0	0	0	10.7663	Mesenchymal
chr1:15602830..15602831,+	0	0	0	0	0	0	0	0	0	0	0	0	0	0	0	0	0	0	0	0	0	0	0	0	0	0	NA
chr1:156092036..156092057,-	0.193121	0	0.195321	5.16537	1.59339	2.76372	4.39973	6.85811	9.10293	5.29014	2.05525	0.31318	0	0.580857	0.519352	0.467507	3.01813	1.87406	0.938367	0.64832	0	0.119754	0	0	0	0.188883	NA
chr1:156092104..156092107,-	0	0	0	2.50198	0.637355	1.93461	0.977719	2.38543	1.26041	1.68323	1.76165	0.31318	0	0.871285	0	0	0.710148	5.62219	0	0.64832	0	0	0	0	0	0	NA
chr1:156092143..156092164,-	0	0.588318	0	3.06694	1.91207	2.48735	6.35517	3.57814	5.04163	2.64507	1.17443	0.31318	0.491614	1.16171	0.519352	0.233754	1.4203	0	0.469184	1.94496	0	0.239509	2.07557	0	0	0	NA
chr1:156092394..156092423,-	0.193121	0.294159	0.390643	7.82876	6.05488	2.48735	5.86631	4.1745	4.83156	2.64507	2.05525	0.93954	0.737422	1.16171	0.519352	0.701261	2.13044	1.87406	0.938367	1.29664	0	0.119754	0	0	0	0	NA
chr1:156094408..156094423,-	3.28305	2.35327	5.66432	165.695	87.3177	107.785	101.683	103.766	131.432	113.738	23.4886	20.3567	7.12841	14.5214	23.8902	6.5451	53.9712	28.1109	28.6202	49.9207	25.5122	3.95189	10.3778	0	0	14.1662	NA
chr1:156094434..156094450,-	11.201	6.4715	9.37543	265.613	137.031	160.02	142.502	210.514	205.796	175.296	22.9014	33.8235	9.34067	27.8811	46.7417	4.20757	75.6307	48.7256	41.2881	77.7984	25.5122	3.71238	2.07557	0	0	23.0438	NA
chr1:156094650..156094692,-	0	0	0	4.11615	1.59339	2.48735	1.46658	2.38543	3.29106	1.92369	0	0.62636	0	0	0	0	0	0	0	0	0	0.119754	0	0	0	0	NA
chr1:156229751..156229754,-	3.08993	0.294159	2.14854	1.04922	0	0.552745	0.733289	0.596357	2.1707	1.68323	2.64247	1.5659	0.491614	0.580857	0.519352	0.701261	0.355074	0	0.469184	0	0	0.718526	0	0	0	1.88883	NA
chr1:156229862..156229897,-	2.89681	5.58902	6.25029	4.84253	3.50545	5.52745	6.11074	8.349	6.79219	4.32829	4.11051	6.2636	4.42453	5.22771	11.4257	6.5451	12.0725	7.49625	4.22265	3.2416	5.10245	6.46673	4.15113	6.95182	1.215	4.5332	NA
chr1:156229939..156230000,+	12.1666	11.4722	8.39882	79.0947	33.1425	45.8778	47.9082	45.025	63.2304	40.6379	15.2676	25.0544	14.9942	9.58414	15.5806	11.4539	14.3805	0	7.97612	15.5597	0	27.304	12.4534	18.0747	11.34	13.0329	NA
chr1:156278727..156278738,-	0.193121	0	0.195321	6.05317	0.637355	2.48735	0.24443	1.19271	2.87093	0.721382	0.587216	0.62636	0	0	0	0.467507	0.532611	0	0	0	0	0	0	0	0	0.188883	NA
chr1:156279259..156279293,-	3.08993	0.882477	0.781286	15.9804	8.28562	9.39666	6.35517	4.47268	7.91255	7.21382	3.22969	2.50544	2.94969	5.51814	5.19352	3.97381	3.01813	0	1.40755	2.59328	0	9.34083	8.30226	0	0	1.1333	NA
chr1:156279302..156279314,-	0.965603	0.588318	0.390643	7.42522	2.23074	4.14559	3.66644	3.87632	3.36108	4.08783	1.76165	3.44498	1.22904	1.16171	2.59676	0.467507	1.24276	0	0.469184	0	0	3.95189	4.15113	0	0	0.377767	NA
chr1:156279525..156279569,+	40.9416	40.2998	41.2128	37.3682	21.0327	30.6773	22.9764	24.1525	29.3395	18.9964	33.1777	31.6312	33.9214	31.3663	38.432	47.2182	39.0581	24.3628	50.6718	27.2294	15.3073	47.0634	51.8891	26.4169	26.73	22.666	NA
chr1:156279640..156279645,+	0.193121	0	0.195321	0	0	0.276372	0	0	0.140045	0.240461	0	0	0	1.16171	11.9451	0.233754	0	5.62219	14.0755	1.29664	0	0	0	0	0	0.188883	NA
chr1:156675579..156675603,+	0.386241	0	0.195321	1.7756	1.27471	1.65823	1.95544	3.27997	3.7112	6.25198	10.5699	8.45586	8.11164	10.4554	17.1386	29.453	11.0073	11.2444	4.69184	8.42816	0	25.8669	22.8312	0	0	3.02213	NA
chr1:156675629..156675668,+	0	0	0	0.807089	0.637355	0.829117	0.24443	1.78907	1.89061	6.97336	6.16576	4.6977	5.65357	8.71285	18.6967	36.9331	11.3624	1.87406	7.50694	5.83488	0	12.4544	12.4534	0	0	2.45548	NA
chr1:156675862..156675881,+	0.386241	0	0	1.93701	0.637355	1.38186	0.977719	2.98179	3.7112	9.61843	11.1571	9.3954	4.67034	6.67985	17.658	22.6741	8.87685	14.9925	9.85285	17.5046	0	12.0952	16.6045	0	0.405	3.3999	NA
chr1:156675883..156675896,+	0	0	0.390643	1.29134	0.956033	0.829117	0.977719	2.08725	3.01097	7.69475	9.68906	7.51632	7.37422	12.7788	9.86768	21.5053	5.68118	9.37031	5.16102	12.9664	0	15.6878	6.2267	0	1.215	3.02213	NA
chr1:156675993..156675998,+	0.193121	0	0	0.564962	0.637355	0.829117	0.488859	2.98179	1.75056	3.84737	5.57855	2.50544	5.65357	7.84157	1.0387	5.84384	2.30798	0	0	0	0	9.34083	0	0	0	0.944416	NA
chr1:156719321..156719324,+	0	0	0	0.0807089	0	0	0	0.298179	0.350113	0.480922	0	0	0.983229	0	0.519352	1.63628	1.4203	0	0.938367	0	0	1.67656	6.2267	0	0	1.51107	NA
chr1:156723021..156723022,+	1.35184	0.588318	0.976607	0.161418	2.23074	1.65823	0.488859	0.596357	0.0700226	0.480922	2.05525	2.19226	3.93291	4.64685	2.07741	0.935015	0.710148	0	5.16102	16.8563	0	1.67656	2.07557	0	1.62	0.755533	NA
chr1:156773494..156773496,+	0	0	0	0	0	0	0	0	0	0	0	0	0	0	0.519352	0	0	65.5922	2.34592	0	0	0	0	0	0	0	late
chr1:156878231..156878232,+	0	0	0	0	0.318678	0	0	0	0.0700226	0	0.587216	0	0.245807	0.290428	0.519352	1.87003	0.177537	0	0.469184	0	0	2.03582	2.07557	0	0	0.188883	NA
chr1:156934900..156934904,+	0	0	0	0.161418	0	0	0	0	0.350113	0.480922	0	0.31318	1.72065	0	0.519352	0.467507	0	0	0	0	0	2.75435	2.07557	0	0	0.377767	NA
chr1:15698451..15698461,+	0.386241	0	0	2.90552	1.91207	0.552745	0.24443	1.19271	0.630203	0.961843	0.293608	0.31318	0.491614	0.290428	0	0	0	0	0	0.64832	0	0.479017	0	0	0	0	NA
chr1:15698605..15698635,-	17.3809	18.532	16.6023	6.61813	3.50545	8.29117	8.31061	11.629	11.6237	10.8207	12.0379	13.1536	10.3239	10.165	7.79028	5.37633	5.14857	1.87406	6.09939	3.88992	5.10245	9.58034	6.2267	9.73254	11.745	9.25528	NA
chr1:15698644..15698657,-	12.746	15.5904	20.8994	5.56892	5.7362	5.52745	5.62188	7.15629	10.7135	9.37797	4.99133	11.2745	5.89937	6.38942	5.19352	3.0388	5.32611	5.62219	5.6302	8.42816	5.10245	3.11361	0	11.1229	8.1	9.63305	NA
chr1:15698659..15698678,-	5.79362	10.5897	7.2269	4.68112	4.14281	3.0401	6.5996	6.26175	8.19264	8.65659	3.52329	9.08222	4.67034	5.80857	0.519352	1.16877	3.19566	0	0.938367	1.29664	5.10245	1.67656	2.07557	4.17109	4.86	5.09985	NA
chr1:15698688..15698693,+	0.965603	0.882477	0.195321	1.45276	0.318678	1.10549	1.46658	1.49089	2.31075	0.480922	1.76165	2.81862	0.983229	1.16171	1.0387	0.233754	0.532611	0	0	0	0	2.03582	0	4.17109	3.24	1.1333	NA
chr1:15698694..15698737,+	29.5475	17.0612	22.8526	16.3839	15.2965	24.0444	21.021	31.3088	37.4621	38.9546	30.2416	31.318	25.0723	27.3003	19.7354	10.7527	12.0725	16.8666	13.1371	25.2845	5.10245	38.8004	37.3602	9.73254	11.34	15.4884	NA
chr1:15710274..15710315,+	10.6216	2.35327	6.44561	106.939	48.7577	53.0635	44.7306	32.2033	43.8341	39.676	18.2037	14.4063	10.0781	10.7459	8.82898	7.24636	9.94207	7.49625	2.34592	12.3181	0	20.2385	10.3778	0	0.405	3.21102	NA
chr1:15710323..15710328,+	0.579362	0	0	3.79332	1.91207	3.0401	2.19987	2.08725	1.89061	1.44276	0.587216	1.25272	0	1.45214	1.0387	0.701261	0.532611	0	0	0	0	1.19754	0	0	0	0	NA
chr1:15710605..15710612,+	0	0	0	2.42127	0.956033	1.38186	0.24443	0	0.210068	0.240461	0.293608	0	0	0	0.519352	0	0	0	0	0	0	0	0	0	0	0	NA
chr1:15721887..15721923,+	5.98674	5.88318	7.42222	11.2185	4.78017	7.18568	7.08846	10.7344	13.4443	9.85889	8.22102	8.45586	6.63679	2.32343	3.63546	3.5063	7.27901	3.74813	7.03775	10.3731	0	2.8741	2.07557	11.1229	6.075	5.6665	NA
chr1:157518617..157518651,-	0	0	0	3.22836	0	0.829117	0	0.298179	0	0	0	0	0	0	0	0	0	0	0	0	0	0	0	0	0	0	NA
chr1:15763554..15763555,+	0	0	0	0	0	0	0	0	0	0	0	0	0	0	0	0	0	0	0	0	0	0	0	0	0	0	NA
chr1:158201151..158201156,+	0	0	0	2.50198	0.637355	0.552745	0.24443	0	0	0	0	0	0	0	0	0	0	0	0	0	0	0	0	0	0	0	NA
chr1:15900154..15900158,-	4.05553	2.64743	3.12514	5.32679	5.41752	5.80382	8.55504	9.24354	9.52307	5.77106	3.22969	2.50544	2.21226	3.19471	2.59676	1.63628	11.895	1.87406	2.8151	3.88992	0	0	0	5.56145	4.05	1.1333	NA
chr1:159096892..159096894,+	12.5528	4.70654	8.98479	0.0807089	0	0.552745	0.24443	1.19271	0.910293	1.92369	5.57855	2.81862	4.17872	7.26071	5.71287	13.7915	11.5399	20.6147	15.9522	14.9114	0	1.55681	0	0	0	0.944416	NA
chr1:159165946..159165956,-	0	0	0	0	0	0	0	0	0	0	0	0	0	0	0	0	0	3.74813	0	0	0	0	0	0	0	0	NA
chr1:159257779..159257781,+	0	0	0.390643	0	0	0	0	0	0.0700226	0	0.293608	0	0.737422	0	0	5.37633	1.06522	1.87406	0.938367	1.29664	0	0.119754	0	0	0	0	NA
chr1:159309076..159309079,+	0	0.294159	0	0	0	0	0	0.298179	0	0	1.17443	0.31318	0	0.580857	4.15481	3.97381	1.06522	0	0.469184	0	0	0.479017	0	0	0	0	NA
chr1:15937836..15937863,-	3.66929	2.94159	3.90643	11.8642	7.01091	7.46206	9.53276	5.6654	8.26266	10.5803	8.22102	9.08222	7.62002	9.87457	12.9838	10.7527	7.81163	14.9925	19.2365	3.2416	0	10.1791	16.6045	0	0.81	4.34432	NA
chr1:15937870..15937880,-	1.54497	2.05911	1.56257	4.19686	3.82413	1.10549	0.24443	3.27997	2.66086	3.12599	1.46804	2.50544	0.983229	2.61386	0.519352	2.33754	2.66305	0	1.40755	0	0	1.43705	2.07557	1.39036	0	1.69995	NA
chr1:15937973..15938001,+	4.6349	0.882477	3.32047	5.4075	0.637355	3.86921	2.68873	1.19271	5.95192	4.08783	3.22969	4.38452	2.45807	5.22771	7.27092	3.27255	6.03626	3.74813	3.28428	1.94496	0	3.47287	10.3778	2.78073	1.215	2.07772	NA
chr1:160052665..160052677,-	0	0	0	25.504	2.54942	1.93461	0.24443	0	0.0700226	0.240461	0	0	0	1.16171	0	0	0	0	0	0	0	0	0	0	0	0	early
chr1:160425335..160425343,+	0	0	0	0	0	0	0	0	0	0	0	0	0	0	0	0	0	1.87406	0	0	0	0	0	0	0	0	NA
chr1:160449070..160449075,-	0	0	0	3.95474	4.14281	3.31647	0.733289	0.298179	0.350113	0.721382	0.587216	1.5659	0.737422	2.61386	3.11611	0	0	0	0	2.59328	0	0	0	0	0	0	NA
chr1:160451336..160451339,-	0	0.294159	0	1.69489	0.318678	1.38186	0.733289	0.298179	0.490158	0.240461	0	0	0.491614	0.580857	0	0	0	0	0	1.94496	0	0	0	0	0	0	NA
chr1:160470463..160470473,-	0	0	0	0	0	0	0	0	0.0700226	0	0.293608	0.62636	3.68711	6.099	0	0	0	0	0	2.59328	0	0	0	0	0	0	NA
chr1:16065742..16065746,-	0	0	0	0	0	0	0	0	0	0	0	0	0	0	0	0	0	0	0	0	0	0	0	0	0	12.4663	Mesenchymal
chr1:161492019..161492022,+	0	0	0	5.32679	3.50545	0.552745	2.19987	2.68361	5.39174	2.64507	0	0.62636	0	0.290428	0.519352	0	0	0	0	0	0	0	0	0	0	0	NA
chr1:161496868..161496872,+	0.772483	0.882477	1.56257	0.0807089	1.59339	1.10549	0.977719	0.298179	0	0.240461	2.34886	1.5659	1.22904	3.48514	5.71287	0.701261	0.532611	7.49625	11.2604	87.5232	5.10245	0.598771	2.07557	2.78073	2.43	0.188883	extraembryonic
chr1:161532325..161532328,+	0	0	0	0	0	0	0	0	0	0	0	0	0	0	0	0	0	0	0	0	0	0	0	0	0	0	NA
chr1:161543307..161543314,+	4.44177	2.35327	1.36725	0	0	0	0	0	0	0	0	0	0	0	0	0	0	0	0	0	0	0	0	0	0	0.377767	NA
chr1:161543359..161543367,+	5.79362	2.64743	5.469	0	0	0	0	0	0	0.240461	0	0	0	0	0.519352	0	0	0	0	1.29664	0	0	0	0	0	0.377767	NA
chr1:161597739..161597740,+	2.51057	0.294159	0.976607	0	0	0	0	0	0	0	0	0	0	0	0	0	0	0	0	0	0	0.119754	0	0	0	0	NA
chr1:161733911..161733953,+	8.30419	7.05981	7.61754	0.0807089	0	0	0.24443	0.298179	0	0.721382	1.76165	1.25272	1.22904	3.19471	1.0387	0.935015	0.710148	1.87406	1.87673	0.64832	0	1.3173	2.07557	2.78073	0.405	3.58878	NA
chr1:161777023..161777024,+	0.193121	0.882477	0.585964	0.403545	0.637355	0.829117	0.733289	0.596357	0.0700226	0.961843	1.46804	1.25272	2.70388	2.32343	2.07741	0	0.887685	0	1.87673	7.13152	5.10245	0.359263	4.15113	0	0.81	0.377767	NA
chr1:16200266..16200287,+	17.574	31.1808	26.1731	15.4154	5.7362	9.12029	10.0216	12.8217	20.9368	16.8323	21.1398	15.659	19.173	20.33	22.8515	25.2454	34.0871	24.3628	31.4353	26.5811	5.10245	19.8792	16.6045	41.7109	29.565	31.1657	NA
chr1:162202588..162202590,-	0.193121	0.294159	0.195321	0.807089	0.637355	0.276372	1.46658	0	0.770248	0.961843	2.34886	1.25272	1.22904	0.871285	2.07741	3.0388	1.24276	0	0.469184	0	0	1.67656	0	0	0	0.755533	NA
chr1:162295132..162295182,-	29.1612	22.9444	27.5403	69.6518	30.2744	34.8229	27.6206	33.0978	49.7861	31.0194	21.727	30.6917	24.5807	20.6204	21.2934	19.6353	28.9385	13.1184	17.829	27.2294	25.5122	21.0768	20.7557	30.588	25.515	27.1992	NA
chr1:162295186..162295193,-	0.386241	0	0.195321	2.82481	1.59339	1.38186	0.733289	0.894536	1.82059	0.961843	0.587216	0.62636	0.245807	0.871285	2.59676	0.467507	1.24276	0	0.938367	0.64832	0	1.19754	0	0	0	0.188883	NA
chr1:162382447..162382475,+	9.07667	2.05911	7.61754	13.8819	7.01091	13.5422	10.9993	10.4363	21.567	11.7826	14.6804	14.7195	9.09487	10.165	9.34833	5.37633	9.23192	1.87406	2.8151	5.83488	0	10.0594	6.2267	0	0.81	4.34432	NA
chr1:162382485..162382501,+	4.05553	0.882477	1.36725	2.09843	0.637355	2.21098	1.46658	2.08725	5.32172	2.16415	2.64247	2.19226	1.47484	2.033	3.63546	0.233754	3.19566	0	0	0.64832	0	1.19754	2.07557	0	0	1.88883	NA
chr1:162382824..162382828,+	0	0	0.195321	0	0	0	0	0	0	0.240461	0	0	0.245807	0	1.55806	0	0.355074	0	0	0	0	0	0	0	0	0	NA
chr1:162895336..162895350,-	0	0	0	0.72638	0.637355	0	0.977719	1.78907	2.87093	2.88553	2.34886	5.32406	6.8826	6.38942	5.71287	0.467507	0	0	0	4.53824	0	0.359263	0	0	0	0	NA
chr1:163224972..163224980,+	0	0	0	14.0434	2.54942	2.48735	0.977719	0.894536	3.50113	1.44276	0.880823	0.31318	1.72065	2.033	0	0	0	0	0	0	0	0	0	0	0	0	NA
chr1:163529487..163529492,-	0.193121	0	0.195321	1.85631	1.27471	1.10549	1.46658	1.78907	2.59084	5.29014	3.22969	1.25272	3.4413	3.48514	5.71287	7.48012	12.6051	20.6147	13.1371	6.4832	0	0.119754	0	1.39036	0	0	NA
chr1:163821459..163821460,+	0	0	0	6.69884	0.956033	4.42196	3.66644	1.49089	0.980316	1.2023	1.17443	1.87908	0.491614	1.45214	5.19352	0	0	0	0	0	0	0	0	0	0	0	NA
chr1:164154702..164154720,+	17.3809	31.1808	20.5088	1.04922	19.4393	9.12029	5.62188	7.45447	0.700226	6.49244	7.92741	13.1536	8.35744	11.0363	9.86768	14.4927	19.3515	28.1109	7.97612	29.1744	15.3073	7.54452	8.30226	130.694	91.53	14.544	NA
chr1:164292769..164292773,+	0	0	0	3.87403	0.956033	2.76372	1.46658	0.894536	0.28009	1.68323	2.64247	2.19226	4.67034	2.61386	1.55806	0	0	0	0	1.29664	0	0	0	0	0	0	NA
chr1:164353246..164353252,-	0	0	0.195321	2.17914	0.318678	0.276372	0	0.298179	0.0700226	0	0	0.31318	0	0.290428	0	0	0	0	0	0	0	0	0	0	0	0	NA
chr1:164353291..164353300,-	0.579362	0	0.195321	9.0394	2.8681	2.21098	0.488859	0.298179	0.210068	0	0	0	0	0	0	0	0	0	0	0	0	0	0	0	0	0.188883	NA
chr1:164353302..164353313,-	0.579362	0.294159	0.195321	13.4784	0.956033	1.93461	0.977719	1.19271	0.210068	0	0	0	0.245807	0	0	0	0	0	0	0	0	0	0	0	0	0	early
chr1:164528288..164528293,+	0	0	0	53.1065	12.7471	12.1604	46.4416	17.5925	35.4314	10.3398	2.64247	0	0	12.7788	0	0	0	0	0	11.6698	0	0	0	0	0	0	NA
chr1:164583449..164583458,-	0.386241	0	0.195321	0.242127	0	0.552745	0.24443	0.298179	0	0	0.587216	0.31318	0.491614	0.290428	0.519352	0.233754	0.177537	1.87406	0.469184	1.29664	0	0.359263	0	0	0	0.56665	NA
chr1:164621621..164621623,+	0	0	0	0	0	0	0	0	0.0700226	0	0.293608	0.62636	0	1.16171	0.519352	0	0	0	1.40755	4.53824	0	0	0	9.73254	8.505	0	NA
chr1:165059626..165059628,-	0.772483	0.588318	0	0	0.318678	0.552745	0.977719	0.894536	0	0	1.76165	0	0	1.45214	1.0387	0.935015	0.177537	11.2444	0.938367	0	0	2.27533	0	1.39036	1.62	0.377767	NA
chr1:165124919..165124928,-	0.193121	0.294159	0	0.161418	0.956033	1.38186	2.4443	1.49089	0.140045	5.5306	4.40412	7.8295	15.24	1.74257	0	19.6353	0.355074	0	2.34592	0.64832	0	8.26305	2.07557	0	0.405	0.377767	NA
chr1:165277091..165277094,+	0	0	0	0	0	0	0	0	0	0	0	0	0	0	5.19352	0	0	1.87406	11.7296	0	0	0	0	0	0	0	late
chr1:165394303..165394311,-	0	0	0	0	0	0	0	0	0	0	0.293608	0	0	0	1.0387	0.467507	0	0	1.40755	15.5597	0	0	0	0	0	0	extraembryonic
chr1:165586194..165586199,-	0	0	0	0	0	0	0	0	0.980316	1.2023	0.880823	0	18.6813	42.1121	104.909	0.467507	0	7.49625	14.0755	22.6912	0	0	0	0	0	0	NA
chr1:165685434..165685438,+	0.193121	0	0.390643	3.22836	0.956033	2.21098	1.22215	5.6654	6.58212	5.29014	4.69772	2.19226	4.42453	4.35643	5.19352	5.84384	6.92394	9.37031	8.4453	1.29664	0	1.67656	6.2267	0	0	1.51107	NA
chr1:165707185..165707220,+	0	0	0	3.30907	1.27471	3.86921	1.46658	1.78907	2.66086	2.16415	2.34886	5.95042	15.24	22.363	31.1611	39.5044	30.1813	13.1184	30.9661	1.94496	0	5.86796	6.2267	0	0.81	0.188883	NA
chr1:165717197..165717201,+	1.15872	1.17664	0.195321	0.161418	0.956033	1.38186	0.977719	0.298179	0.210068	1.68323	2.05525	1.25272	2.70388	1.74257	0	3.5063	1.06522	1.87406	0.469184	0.64832	0	3.83214	0	0	0.405	0.755533	NA
chr1:165746052..165746084,-	6.17986	4.11823	5.66432	15.5768	5.09884	14.095	6.84403	6.85811	11.2036	8.41613	7.34019	7.51632	6.39099	5.22771	11.4257	3.5063	6.39133	1.87406	2.8151	5.18656	0	9.34083	14.529	4.17109	4.05	6.7998	NA
chr1:165746094..165746146,-	29.3543	20.5911	29.8842	33.7363	16.5712	25.7026	29.0871	33.396	40.473	50.0158	29.6544	41.0266	31.7091	34.8514	35.3159	19.4016	25.2102	18.7406	29.0894	37.6026	10.2049	24.5496	39.4357	16.6844	29.97	33.8101	NA
chr1:165812395..165812434,-	14.484	15.2963	12.8912	24.5355	7.96694	8.84392	8.55504	14.3126	17.8558	13.7063	3.52329	3.75816	4.91614	5.80857	4.67417	2.33754	2.66305	7.49625	6.09939	13.6147	0	1.91607	2.07557	15.294	10.125	19.6439	NA
chr1:165834872..165834923,-	22.2089	16.7671	21.4854	11.5414	4.78017	6.90931	5.62188	7.45447	11.4137	6.25198	4.11051	4.07134	8.11164	6.38942	5.19352	2.80504	10.6522	5.62219	7.03775	12.3181	10.2049	2.03582	0	11.1229	4.86	23.9882	NA
chr1:165834982..165834987,+	0.579362	0.294159	0.195321	3.06694	0.318678	1.10549	0.24443	1.19271	1.19038	1.44276	0.587216	0.62636	0.983229	0.871285	0	0.467507	0.710148	0	0	1.94496	5.10245	0.598771	0	0	0.405	0.377767	NA
chr1:165834999..165835044,+	23.3676	44.1238	31.6421	83.3723	37.2853	31.7828	23.7097	24.4507	42.4337	36.3096	43.7476	42.5925	38.5917	39.2078	56.09	48.387	31.069	29.985	43.1649	121.884	40.8196	36.046	26.9823	15.294	27.135	22.0993	NA
chr1:165874768..165874796,-	14.0978	15.2963	18.7509	67.0691	40.7907	51.1289	52.3079	37.2723	53.7773	36.0691	31.416	23.1753	31.9549	36.594	25.4482	36.6993	26.6305	39.3553	22.5208	52.5139	20.4098	21.3163	16.6045	36.1494	35.64	10.7663	NA
chr1:165879531..165879540,+	0.386241	0.588318	0.585964	2.17914	0.318678	0.276372	0.733289	0	1.82059	1.2023	1.76165	2.50544	1.22904	3.19471	1.55806	0.935015	1.06522	0	1.40755	0	0	1.19754	0	1.39036	1.62	1.69995	NA
chr1:165879545..165879570,+	5.79362	5.0007	7.2269	9.52365	2.54942	3.0401	3.66644	8.64718	9.38303	10.0994	6.75298	8.76904	7.37422	9.29371	8.30963	3.74006	6.03626	1.87406	5.16102	4.53824	0	4.55066	4.15113	2.78073	1.215	5.85538	NA
chr1:165879571..165879609,+	9.84915	9.41309	12.5006	10.6536	3.18678	6.08019	5.13302	8.349	12.1839	18.0346	7.92741	15.3458	8.11164	9.00328	21.2934	4.20757	9.94207	3.74813	11.7296	22.6912	0	5.62845	14.529	4.17109	4.455	9.25528	NA
chr1:165953681..165953698,+	5.40738	17.3554	7.61754	23.2442	15.9339	22.9389	39.5976	66.4939	68.4121	46.6494	52.8494	78.6082	36.6253	56.3431	55.5706	22.4404	20.5943	29.985	53.4869	51.8656	158.176	6.58649	10.3778	0	0	1.69995	NA
chr1:166058224..166058225,+	0	0	0	0	0	0	0	0	0	0	0	0	0	0	0	0	0	0	0	0	0	0	0	0	0	0	NA
chr1:166168753..166168764,-	0.579362	0.882477	1.56257	2.66339	1.91207	2.48735	3.66644	2.68361	1.82059	2.64507	3.22969	2.81862	3.68711	4.64685	3.11611	0.467507	0.355074	0	4.22265	3.2416	0	0.718526	0	11.1229	6.075	0.56665	NA
chr1:166168772..166168822,-	13.3253	18.532	14.6491	18.1595	10.1977	9.67304	20.5321	25.6434	32.1404	43.2829	16.442	36.6421	23.1059	30.495	20.2547	9.81765	13.1377	16.8666	23.9284	12.9664	5.10245	7.30501	2.07557	97.3254	88.29	26.6325	NA
chr1:166168825..166168835,-	2.31745	3.23575	1.95321	0.403545	0.318678	0	0.977719	1.19271	1.82059	0.961843	0.293608	1.5659	1.22904	1.16171	1.0387	0.233754	0.532611	0	2.34592	1.29664	0	0.83828	0	4.17109	5.265	2.83325	NA
chr1:166329074..166329078,+	1.15872	1.47079	1.95321	0.242127	0.318678	0.552745	0	0	0.350113	0.480922	2.05525	4.07134	1.22904	2.033	1.0387	2.33754	1.59783	0	0	0.64832	0	2.15558	0	0	0	4.15543	NA
chr1:166391611..166391634,+	4.24865	3.23575	4.88304	8.71656	5.41752	4.14559	2.93316	1.78907	5.32172	3.60691	2.05525	2.19226	3.68711	3.19471	6.23222	2.80504	3.01813	0	6.09939	4.53824	0	2.51484	6.2267	4.17109	3.645	4.34432	NA
chr1:166429939..166429943,+	3.08993	3.23575	3.12514	3.14765	3.50545	3.86921	4.1553	2.98179	1.5405	1.92369	3.22969	4.38452	1.96646	3.77557	2.07741	5.61009	4.26089	1.87406	7.97612	1.94496	5.10245	3.59263	6.2267	2.78073	3.645	2.07772	NA
chr1:166505089..166505100,+	0	0	0	6.61813	2.8681	2.76372	1.71101	0.894536	1.26041	1.44276	0.293608	0.31318	0.983229	0.580857	0.519352	0.467507	0.532611	0	1.87673	0	0	0	0	0	0	5.47761	NA
chr1:166623653..166623662,+	0	0	0	0	0	0	0	0	0	0	0	0	0	0	0	0	0	0	0	0	0	0	0	0	0	0	NA
chr1:166707812..166707826,-	0	0	0	0	0	0	0	0	0	0	0	0	0	0	0.519352	0	0.532611	1.87406	0.469184	0	0	0	0	16.6844	17.415	20.2105	NA
chr1:166707830..166707842,-	0	0	0	0	0	0	0	0	0	0	0	0	0	0	0	0	0.177537	1.87406	0.938367	0.64832	0	0	0	29.1976	16.2	20.7772	NA
chr1:166720006..166720011,+	2.12433	3.23575	2.34386	2.25985	0.637355	1.10549	0.733289	2.08725	2.59084	1.68323	2.64247	2.19226	1.22904	0.871285	1.55806	0.935015	1.06522	0	2.8151	1.29664	5.10245	1.79631	2.07557	4.17109	2.43	2.45548	NA
chr1:166720020..166720052,+	70.8753	62.0675	74.2222	32.8485	17.846	31.7828	40.5753	54.5667	54.9677	81.0353	64.0065	64.5151	67.597	55.4718	50.8965	46.2832	29.4711	18.7406	55.8328	66.777	51.0245	50.2968	47.738	79.2507	55.485	58.9316	NA
chr1:166992587..166992601,-	0	0	0	0	0	0	0	0.596357	2.52081	5.29014	20.8462	12.5272	20.402	11.3267	6.23222	0	0	0	0	3.2416	0	0	0	0	1.215	0	middle
chr1:167143154..167143165,-	0	0	0	0.0807089	0	0	0	0.298179	0.28009	0.480922	0.293608	0	0.491614	0.580857	4.15481	4.20757	5.14857	3.74813	3.75347	0.64832	0	0.239509	0	0	0	0.188883	NA
chr1:167406795..167406799,-	3.28305	3.52991	2.53918	9.28153	4.78017	4.42196	1.95544	2.08725	0.980316	3.60691	5.57855	5.63724	5.65357	2.90428	3.63546	10.7527	4.61596	7.49625	3.75347	3.2416	5.10245	4.55066	4.15113	23.6362	6.48	5.47761	NA
chr1:167408472..167408476,+	0	0	0	0.0807089	0	0	0.24443	0	0.0700226	0	0	0	0.245807	0	0	0	0	0	0	0	0	0	0	0	0	0	NA
chr1:167408621..167408640,-	0	0	0.195321	4.92324	1.59339	0	0.24443	0	0.0700226	0	0.293608	0	0.245807	0.290428	0	0	0.355074	0	0	0	0	0	0	0	0.405	0	NA
chr1:167408800..167408812,-	4.44177	7.05981	5.85964	99.3527	15.6152	11.6076	8.55504	14.0144	16.6654	8.65659	6.75298	16.9117	11.3071	13.6501	20.7741	11.2202	44.9168	37.4813	34.7196	27.8778	35.7171	8.98157	12.4534	45.882	40.095	19.455	NA
chr1:167408834..167408841,-	0.772483	1.47079	0.976607	19.3701	3.18678	2.48735	0.977719	0.596357	2.03065	0.480922	0.880823	3.1318	2.21226	1.74257	2.07741	3.27255	10.8298	1.87406	5.16102	0.64832	0	0.958034	4.15113	2.78073	10.935	3.77767	NA
chr1:167410505..167410512,-	0	0	0	7.10238	1.27471	1.93461	0.488859	0	0	0	0	0	0	0	0	0	0	0	0.469184	0	0	0	0	0	0	0	NA
chr1:167410521..167410524,-	0	0	0	2.90552	0.637355	0	0.24443	0	0	0	0	0	0	0	0	0	0	0	0	0	0	0	0	0	0	0	NA
chr1:167410526..167410541,-	0	0	0	19.0473	3.18678	4.9747	0.24443	0	0	0	0.293608	0	0	0	0	0	0	0	0	0	0	0	0	0	0	0	early
chr1:167410546..167410553,-	0	0	0	5.24608	0.637355	1.38186	0.24443	0	0	0	0	0	0	0	0	0	0	0	0	0	0	0	0	0	0	0	NA
chr1:167410562..167410569,-	0	0	0	5.4075	0.956033	1.10549	0	0	0	0	0	0	0	0	0	0	0	0	0	0	0	0	0	0	0	0	NA
chr1:167410781..167410795,-	0	0	0	27.1182	3.18678	4.14559	0	0	0	0	0	0	0	0	0	0	0	0	0	0	0	0	0	0	0	0	early
chr1:167410796..167410802,-	0	0	0	6.53742	0	0.276372	0	0	0	0	0	0	0	0	0	0	0	0	0	0	0	0	0	0	0	0	NA
chr1:167410812..167410821,-	0	0	0	7.99018	1.59339	1.38186	0	0	0	0	0	0	0	0	0	0	0	0	0	0	0	0	0	0	0	0	NA
chr1:167410844..167410847,-	0	0	0	1.53347	0.956033	0	0	0	0	0	0	0	0	0	0	0	0	0	0	0	0	0	0	0	0	0	NA
chr1:167484891..167484929,-	9.26979	11.7664	15.4304	11.4607	4.46149	3.31647	2.93316	1.78907	3.22104	3.84737	5.87216	7.20314	9.58648	5.51814	13.5031	11.6877	13.3153	22.4888	14.5447	22.0429	30.6147	6.82599	14.529	4.17109	5.265	10.1997	NA
chr1:167485082..167485111,-	1.54497	3.52991	4.88304	11.0571	5.41752	4.14559	4.1553	3.27997	5.53178	5.77106	4.99133	4.07134	2.94969	5.22771	7.27092	5.37633	10.8298	9.37031	5.16102	3.88992	0	4.1914	4.15113	5.56145	1.62	3.02213	NA
chr1:167485114..167485123,-	0.579362	0.882477	1.17193	2.25985	0.637355	1.65823	1.22215	1.49089	1.33043	0.721382	0.587216	0.93954	0.983229	1.45214	0	1.16877	3.01813	1.87406	0.469184	0.64832	0	0.958034	2.07557	0	1.215	1.51107	NA
chr1:167485126..167485152,-	2.31745	2.64743	3.12514	8.1516	4.14281	2.76372	2.19987	3.27997	4.9716	4.56876	2.64247	2.81862	2.94969	2.90428	2.07741	2.10378	6.21379	0	3.75347	2.59328	5.10245	2.15558	6.2267	4.17109	2.025	1.69995	NA
chr1:167616495..167616516,-	5.02114	3.82407	4.49239	56.1734	23.2635	23.768	18.3322	11.629	21.2168	30.5385	8.80823	9.70858	4.67034	5.51814	2.07741	3.0388	1.95291	0	2.34592	2.59328	5.10245	7.42477	14.529	0	2.025	4.91097	NA
chr1:167616517..167616545,-	9.26979	8.23645	9.37543	130.748	46.2083	69.0931	46.9305	32.2033	47.3353	65.6458	21.727	29.1257	16.2233	20.33	17.1386	10.2852	10.8298	0	6.56857	11.0214	5.10245	18.4422	22.8312	6.95182	12.15	9.82193	NA
chr1:167616590..167616627,+	19.3121	17.6495	19.1415	62.2266	35.3732	46.9833	31.7759	29.2215	35.8516	30.2981	21.1398	30.0653	25.0723	23.8151	20.2547	17.7653	20.7718	9.37031	16.8906	17.5046	10.2049	23.2323	10.3778	26.4169	20.655	13.4107	NA
chr1:167654341..167654356,+	0.386241	0	0.195321	3.79332	1.59339	1.10549	0.733289	0.298179	0.0700226	0.480922	0	0.31318	0	0	0	0	0	0	0	0	0	0	0	0	0	0.188883	NA
chr1:167654562..167654666,+	74.7377	66.7741	67.3859	63.1144	38.56	46.1542	36.9089	45.025	60.8496	61.7984	27.0119	36.3289	26.793	23.5247	33.7579	16.5965	26.8081	9.37031	30.4969	29.1744	5.10245	36.5251	37.3602	18.0747	16.2	28.8991	NA
chr1:167730351..167730389,+	17.3809	25.2977	19.1415	5.16537	19.1207	17.9642	18.0878	22.9598	5.11165	13.4658	13.2124	7.51632	14.2568	13.9406	14.5418	10.7527	23.9675	28.1109	10.322	11.6698	51.0245	10.8976	16.6045	68.1278	52.65	15.6773	NA
chr1:167730399..167730433,-	57.9362	94.425	63.6748	4.43899	44.2962	30.401	23.4652	37.5705	4.13133	13.2253	25.2503	24.428	13.7652	26.429	14.5418	28.7517	62.3155	39.3553	8.91449	50.569	35.7171	19.1607	18.6801	439.355	200.475	44.1987	NA
chr1:167754990..167755003,-	1932.17	1985.87	2175.69	1198.37	678.465	945.47	1109.71	1197.49	1743.56	1203.51	944.243	1047.9	1224.61	1202.95	1465.61	807.853	2141.1	691.529	1366.26	3219.56	1637.88	509.674	543.798	2396.99	2253.82	1205.45	NA
chr1:167767078..167767135,+	4.24865	4.70654	10.7427	2.66339	0.956033	0.829117	0.977719	4.47268	6.02194	7.93521	54.9047	78.295	76.446	50.2441	43.1062	5.84384	5.14857	11.2444	12.668	63.5354	5.10245	10.2989	8.30226	13.9036	12.15	9.82193	NA
chr1:167776812..167776845,+	17.574	15.2963	15.4304	35.3505	9.87901	12.7131	6.35517	6.55993	16.1752	11.3017	5.28494	9.08222	5.89937	5.22771	1.55806	3.97381	10.2971	0	3.28428	1.29664	10.2049	4.1914	2.07557	13.9036	9.315	10.9552	NA
chr1:167951907..167951909,-	0.193121	0	0.195321	0	0	0.552745	0	0.298179	0.210068	0	0.880823	0.31318	0.737422	0.290428	0.519352	0.701261	0.177537	0	0	0	0	1.67656	0	0	0	0	NA
chr1:167953937..167953946,+	0.386241	1.17664	0	0.403545	0.637355	0.829117	1.71101	0	0	0.480922	1.46804	0.93954	0.491614	0.871285	0.519352	1.63628	0.355074	0	0.938367	0	0	3.23337	4.15113	0	0	0.188883	NA
chr1:167954317..167954328,-	0.386241	2.05911	0	1.04922	1.59339	2.48735	1.22215	0.894536	0.630203	0.961843	1.76165	1.87908	1.96646	0.580857	1.0387	1.87003	1.4203	1.87406	0.469184	0	0	4.31115	0	0	0.405	0.377767	NA
chr1:167954346..167954357,-	0.579362	0.882477	0.195321	1.21063	2.23074	0.829117	1.46658	1.19271	0.560181	0.721382	2.64247	2.81862	1.22904	0.871285	0.519352	2.57129	0.532611	0	0	0.64832	0	5.5087	2.07557	1.39036	0.405	0.188883	NA
chr1:167957092..167957103,-	1.35184	0.294159	1.17193	1.85631	1.91207	2.48735	1.46658	0.298179	0.490158	0.721382	3.52329	1.5659	0.737422	0.871285	3.11611	2.57129	0.710148	0	0.469184	0.64832	0	4.43091	2.07557	0	0.81	0.377767	NA
chr1:167957158..167957169,-	0.772483	1.76495	1.75789	2.82481	3.82413	3.31647	4.1553	1.19271	1.61052	1.92369	4.69772	4.6977	1.47484	1.45214	1.0387	1.87003	1.59783	1.87406	0.469184	3.2416	0	8.14329	6.2267	1.39036	0.81	0.755533	NA
chr1:167964512..167964514,-	0	0	0	0.403545	0.318678	0	0.24443	0	0.0700226	0	0.293608	0.31318	0	0.580857	0	0.233754	0.355074	0	0	0.64832	0	1.79631	2.07557	0	0	0	NA
chr1:167988829..167988876,-	8.11107	2.94159	5.66432	33.2521	15.6152	18.517	15.8879	20.2762	24.5779	25.4888	11.4507	13.4667	9.83229	8.71285	17.1386	5.61009	6.56887	7.49625	10.322	11.0214	0	18.4422	20.7557	11.1229	12.96	11.7108	NA
chr1:167988901..167988911,-	1.35184	2.94159	0.976607	4.5197	1.59339	0.276372	1.46658	1.49089	2.73088	1.68323	1.17443	0.93954	1.96646	0.871285	4.15481	0.701261	2.30798	0	2.34592	1.94496	0	2.8741	2.07557	0	0	3.58878	NA
chr1:167988917..167988928,-	0.965603	0.882477	2.92982	2.66339	2.23074	1.93461	1.22215	0.596357	1.96063	2.64507	2.64247	1.25272	1.96646	1.16171	2.59676	2.57129	1.4203	0	2.34592	1.94496	0	1.67656	2.07557	0	0	0.944416	NA
chr1:167998995..167998999,-	0	0	0	0	0	0	0	0	0	0	0	0	0	0.290428	0.519352	0	0.177537	0	0	0	0	0	0	22.2458	6.48	0	NA
chr1:168006320..168006335,-	0	0	0	0	0	0	0	0	0	0	1.17443	1.87908	0.983229	0.871285	2.07741	15.194	11.5399	9.37031	18.7673	0	0	0	0	634.006	635.04	0	late
chr1:168006336..168006349,-	0	0	0	0	0	0	0	0	0	0	0.293608	1.87908	0.491614	0	0.519352	4.20757	4.7935	1.87406	11.7296	0	0	0	0	447.697	390.825	0	late
chr1:168006460..168006465,-	0	0	0	0	0	0	0	0	0	0	0	0	0	0	0	0.233754	0	0	0	0	0	0	0	12.5133	12.555	0	hepatocytes
chr1:168007748..168007770,-	0	0	0	0	0	0	0	0	0.0700226	0	0.293608	0	0	0	0	0	0	0	0	0	0	0	0	9.73254	12.96	0	hepatocytes
chr1:168044859..168044866,-	0	0	0	0	0	0	0	0	0	0	0	0	0.245807	0	0	1.16877	0.532611	0	2.34592	0.64832	0	0.239509	0	1.39036	1.62	36.0767	Mesenchymal
chr1:168044868..168044879,-	0.386241	0.294159	0	0	0	0	0	0	0	0	0	0.62636	2.94969	4.93728	1.55806	3.97381	7.45655	1.87406	6.56857	6.4832	0	1.79631	0	40.3205	50.625	587.994	NA
chr1:168065462..168065463,-	0	0	0	0	0	0	0	0	0	0	0	0	0	0	0	0	0	0	0	0	0	0	0	0	0.81	2.45548	NA
chr1:168065479..168065515,-	0.193121	0	0	0.242127	0	0	0	0	0.0700226	0	0.587216	0.31318	0.491614	0.871285	0	1.16877	2.30798	0	0.938367	1.29664	0	0.479017	0	23.6362	10.125	33.999	NA
chr1:168119389..168119400,-	0.579362	0.588318	0	5.89175	1.27471	0.829117	0.488859	1.49089	1.75056	1.44276	1.17443	0.62636	0.245807	0.871285	0.519352	0.467507	1.4203	0	0.469184	2.59328	0	0.718526	0	2.78073	0.81	6.7998	NA
chr1:168119680..168119690,+	0.193121	0	0	6.69884	4.14281	7.46206	7.33289	3.87632	1.89061	3.36645	1.46804	0.93954	1.72065	1.16171	0	0.233754	0	0	0.469184	0.64832	0	0.83828	0	0	0	0	NA
chr1:168119722..168119739,-	0	0.294159	0	20.8229	3.50545	3.31647	0.977719	0.596357	0.350113	0	0.293608	0	0	0	0	0	0	0	0	0	0	0	0	0	0	0.377767	early
chr1:168186230..168186244,+	2.12433	2.64743	2.34386	5.48821	2.23074	4.42196	4.39973	3.87632	5.67183	3.36645	2.34886	1.87908	2.45807	2.32343	4.15481	3.5063	6.21379	13.1184	7.50694	5.18656	0	1.67656	2.07557	1.39036	0.81	3.58878	NA
chr1:168186255..168186270,+	1.73809	2.94159	1.75789	4.03545	1.27471	1.93461	2.4443	3.27997	2.87093	3.60691	1.17443	2.50544	3.68711	2.033	0.519352	2.57129	2.30798	1.87406	1.40755	2.59328	0	1.07779	2.07557	1.39036	0.405	2.83325	NA
chr1:168186291..168186315,+	2.70369	5.0007	5.469	10.7343	7.64827	5.80382	7.57732	9.24354	11.4137	11.0612	5.57855	6.88996	7.62002	8.132	10.9064	5.61009	10.8298	13.1184	11.2604	15.5597	5.10245	3.83214	8.30226	0	1.215	3.96655	NA
chr1:168320256..168320277,-	0.965603	3.52991	1.95321	2.90552	0.637355	1.38186	0.24443	0.894536	2.10068	0.480922	5.28494	3.75816	6.14518	6.67985	0.519352	5.14258	6.03626	0	2.8151	0	5.10245	2.39509	0	6.95182	15.795	1.32218	NA
chr1:168320569..168320585,-	3.66929	2.94159	2.14854	6.376	3.50545	5.80382	4.64416	4.77086	9.94321	5.77106	9.39545	12.8404	9.58648	9.87457	6.23222	3.0388	2.13044	1.87406	9.38367	4.53824	0	5.38894	0	5.56145	2.025	1.69995	NA
chr1:168320605..168320641,-	5.40738	6.17734	3.90643	7.50593	2.54942	5.52745	9.77719	6.55993	14.0745	10.3398	18.4973	25.6808	21.631	21.7821	22.3321	5.37633	3.19566	3.74813	11.2604	18.153	10.2049	10.4186	4.15113	0	1.62	8.12198	NA
chr1:168320785..168320826,-	73.3858	91.1893	82.4257	27.6024	11.4724	12.7131	11.9771	11.9271	12.8141	10.3398	29.0672	34.4498	50.1447	51.6963	39.9901	100.514	87.5257	52.4738	57.7096	67.4253	86.7416	51.8536	22.8312	296.147	242.595	61.7648	NA
chr1:168321997..168322041,-	0	0	0	0	0	0	0	0	0	0	0	0	0	0	0.519352	0	0.355074	0	0	0	0	0	0	15.294	19.035	0	hepatocytes
chr1:168362696..168362709,-	25.8782	8.53061	72.0736	0	0	0.276372	0.24443	0	0.28009	0	0	0.31318	0	1.16171	1.0387	0.701261	0.532611	0	1.40755	1.94496	0	0	0	0	0	15.8662	NA
chr1:168362804..168362812,-	3.66929	1.17664	11.7193	0	0	0	0	0	0	0	0	0	0	0	0	0	0	0	0	0.64832	0	0	0	0	0	3.02213	NA
chr1:168362865..168362872,-	2.51057	0.882477	7.2269	0.0807089	0	0	0.488859	0	0.210068	0	0	0.31318	0.245807	0.580857	1.0387	0.233754	0.177537	0	0	0	0	0	0	0	0	2.07772	NA
chr1:168660254..168660329,-	53.1082	68.2449	63.6748	39.8702	27.0876	31.7828	36.9089	43.8323	65.191	68.2909	49.6197	41.9661	32.9382	27.8811	34.2772	25.0116	32.8443	63.7181	86.3298	40.1959	25.5122	41.7942	31.1335	4.17109	5.265	46.0875	NA
chr1:168660330..168660343,-	1.93121	5.29486	4.29707	3.87403	1.91207	1.38186	1.46658	2.38543	5.46176	7.45428	4.11051	4.6977	3.19549	2.61386	4.15481	3.27255	2.48552	5.62219	6.56857	6.4832	0	0.718526	2.07557	1.39036	0.81	5.28873	NA
chr1:168671681..168671713,+	10.0423	4.70654	5.469	9.84649	6.69223	9.12029	8.06618	11.3308	7.28235	8.17567	5.57855	6.57678	5.40776	8.71285	6.23222	6.5451	8.1667	1.87406	8.4453	5.83488	5.10245	8.14329	12.4534	31.9784	17.82	4.91097	NA
chr1:168684548..168684577,-	8.69043	4.70654	8.59415	19.2894	15.2965	20.1752	12.4659	8.349	10.5034	12.7444	8.51463	6.57678	9.09487	10.165	10.9064	7.94762	7.98916	3.74813	7.03775	11.0214	0	9.9396	16.6045	2.78073	1.62	5.85538	NA
chr1:168710785..168710828,+	249.319	368.287	345.719	53.9136	29.637	42.5614	43.5085	50.094	65.121	37.2714	32.0032	46.977	58.5021	55.1814	82.0576	41.3744	87.7032	73.0884	195.65	157.542	66.3318	14.2508	8.30226	168.234	145.8	157.529	NA
chr1:168710833..168710853,+	23.5607	57.6552	22.8526	16.1418	9.24165	12.1604	8.79947	10.1381	19.0461	9.61843	7.6338	11.2745	9.58648	6.97028	12.9838	6.31135	17.2211	9.37031	18.7673	12.3181	15.3073	5.98771	0	26.4169	10.53	9.82193	NA
chr1:168710859..168710877,+	4.44177	7.05981	7.03157	6.45671	4.78017	6.08019	6.35517	6.26175	10.9235	5.5306	2.93608	3.1318	3.93291	4.64685	3.63546	3.0388	6.21379	3.74813	8.4453	3.88992	0	1.79631	4.15113	1.39036	2.43	4.72208	NA
chr1:168710900..168710907,+	0.772483	0	0.195321	2.90552	0.637355	2.21098	2.19987	0.298179	2.10068	1.44276	1.46804	1.5659	0.983229	1.45214	0.519352	0.701261	0.710148	0	0.469184	0	0	1.19754	2.07557	0	0.405	1.1333	NA
chr1:168710915..168710922,+	0.772483	1.47079	0.781286	2.50198	0.956033	0.829117	1.71101	1.49089	1.82059	1.68323	2.05525	2.19226	2.21226	0.580857	0.519352	1.87003	1.4203	0	2.8151	1.94496	0	1.3173	2.07557	0	0	0.944416	NA
chr1:168725576..168725579,-	0	0	0	0	0	0	0	0	0	0.240461	0	0	0	0	0	0	0	0	0	0	0	0	0	0	0	0	NA
chr1:168747515..168747562,+	42.2934	49.1245	59.1824	21.4686	10.5164	11.3313	12.9548	13.1199	22.5473	27.653	16.7356	23.1753	18.1897	19.4587	17.1386	13.324	21.837	9.37031	16.8906	24.6362	20.4098	12.9335	20.7557	20.8554	14.175	37.7767	NA
chr1:168800381..168800397,-	0	0	0	4.76183	1.59339	1.65823	0.977719	0.298179	1.5405	1.2023	1.46804	2.19226	0.491614	1.16171	1.0387	0	0.887685	1.87406	0.469184	1.94496	0	0.359263	0	1.39036	2.43	0	NA
chr1:168800434..168800456,-	0	0	0.390643	7.02168	1.59339	2.48735	2.19987	3.57814	5.67183	4.08783	5.57855	6.88996	5.89937	4.64685	2.07741	0.935015	3.55074	1.87406	2.8151	6.4832	0	0.83828	0	15.294	14.58	0.56665	NA
chr1:168951173..168951188,+	0	0	0	0	0	0	0	0	0	0	0	0	0	0	0.519352	0	0	0	0	0	0	0	0	0	0	0	NA
chr1:168999966..168999998,+	18.9258	18.2379	21.876	9.12011	3.18678	6.63294	7.08846	7.15629	10.7835	9.37797	11.7443	10.6481	15.24	17.7161	26.4869	16.129	22.1921	7.49625	11.2604	18.153	10.2049	12.8137	26.9823	26.4169	17.82	33.8101	NA
chr1:169000227..169000240,+	3.08993	4.70654	2.92982	1.53347	0.318678	0	0.977719	0.298179	0.560181	0.240461	1.46804	0	1.72065	1.45214	2.59676	0.701261	3.01813	0	3.28428	0	0	0.718526	0	5.56145	12.15	10.5775	NA
chr1:169060414..169060431,+	0.193121	0.294159	0	4.5197	0.956033	1.38186	2.68873	2.98179	3.15102	2.64507	1.76165	5.32406	2.94969	2.61386	0.519352	0.233754	2.13044	0	0	0	0	0.479017	0	13.9036	12.96	0	NA
chr1:169191904..169191916,-	5.40738	4.11823	6.64093	0.161418	0	0	0	0	0.770248	0.480922	2.64247	2.81862	1.22904	0.580857	1.55806	1.87003	3.3732	3.74813	4.22265	0.64832	0	0.119754	2.07557	1.39036	0	0.188883	NA
chr1:169204625..169204626,-	0	0	0	0	0	0	0	0	0	0	0	0	0	0	0.519352	0	0	0	0	0	0	0	0	0	0	0	NA
chr1:169208249..169208288,+	14.0978	7.64813	12.5006	46.0848	31.2304	28.7427	27.1317	28.327	37.9522	30.5385	24.0758	21.6094	18.4355	17.4257	17.658	16.8303	15.0906	14.9925	23.9284	28.5261	5.10245	19.6397	18.6801	16.6844	16.2	18.3217	NA
chr1:169208303..169208324,+	6.17986	4.41238	2.14854	41.2423	16.8899	21.2807	10.5105	14.3126	22.4072	18.9964	11.4507	8.14268	7.37422	9.00328	5.71287	4.67507	5.85872	0	5.6302	4.53824	0	8.62231	8.30226	6.95182	3.24	8.31086	NA
chr1:169231554..169231565,+	3.47617	1.47079	1.95321	5.32679	3.18678	3.59284	3.66644	1.49089	3.15102	4.08783	3.22969	3.75816	2.21226	2.32343	2.07741	1.16877	1.77537	0	0.938367	3.88992	0	1.43705	4.15113	1.39036	1.215	1.88883	NA
chr1:169231569..169231602,+	13.3253	6.4715	12.1099	17.0296	8.28562	10.5022	9.53276	7.75265	11.7638	9.85889	7.34019	10.0218	7.37422	4.066	5.71287	3.74006	5.32611	5.62219	4.22265	8.42816	0	7.0655	2.07557	5.56145	5.67	16.8106	NA
chr1:169231603..169231610,+	1.54497	1.47079	1.75789	4.35828	0.637355	1.93461	0.488859	0.596357	1.12036	0.240461	0.587216	0.93954	0.983229	0.580857	1.0387	0.701261	0.355074	0	1.40755	0	0	0.239509	0	1.39036	0.81	4.5332	NA
chr1:169267755..169267776,-	4.6349	2.35327	4.10175	2.42127	3.50545	4.42196	3.17759	3.87632	4.20135	6.97336	7.34019	6.57678	11.3071	8.132	11.9451	9.5839	7.98916	3.74813	8.4453	14.9114	5.10245	8.02354	8.30226	1.39036	0.81	4.72208	NA
chr1:169267807..169267847,-	8.69043	2.94159	8.00818	4.27757	3.50545	6.35657	5.62188	8.94536	10.9935	15.63	11.7443	14.0931	13.7652	10.7459	17.658	6.31135	10.1196	7.49625	9.38367	12.3181	10.2049	8.14329	10.3778	5.56145	2.025	6.7998	NA
chr1:169272666..169272679,+	5.79362	1.76495	2.34386	0.0807089	0.318678	0.276372	0	0.596357	0.770248	1.2023	0.587216	0.62636	2.45807	2.033	2.07741	0.701261	0.177537	1.87406	0.469184	7.13152	0	0.479017	0	0	0	5.28873	NA
chr1:169286731..169286739,-	0	0	0	0.484253	0	0	0.24443	0	1.96063	2.40461	3.52329	0.93954	0	0	0	0	0	0	0	0.64832	0	0.119754	0	0	0	0	NA
chr1:169331601..169331658,-	17.7671	17.0612	16.2117	80.3054	45.8896	42.8377	45.2195	47.1122	76.7447	66.6076	41.1051	59.5042	46.2118	41.2408	20.2547	13.5577	23.4349	1.87406	7.97612	33.7127	0	18.8014	29.0579	19.4651	14.985	19.2661	NA
chr1:169365015..169365028,-	2.12433	0.588318	1.56257	9.20082	3.50545	6.08019	4.1553	2.38543	2.73088	1.44276	3.22969	2.50544	3.93291	3.48514	1.0387	2.10378	0.887685	0	0.938367	3.88992	0	0.359263	0	6.95182	5.67	0.944416	NA
chr1:169365033..169365055,-	2.12433	2.35327	2.53918	11.5414	4.14281	7.18568	4.39973	3.27997	6.72217	2.40461	3.8169	4.38452	2.21226	3.19471	1.0387	2.10378	1.24276	0	2.34592	1.29664	0	0.958034	0	9.73254	10.125	1.51107	NA
chr1:169365066..169365097,-	11.5872	24.7094	18.9462	11.7028	5.41752	9.12029	9.77719	6.26175	10.7835	13.9467	8.51463	19.7303	7.12841	11.3267	5.19352	6.31135	11.7174	13.1184	6.56857	9.7248	0	8.86182	16.6045	8.34218	4.05	9.82193	NA
chr1:169365099..169365123,-	11.0079	11.4722	7.2269	13.6398	4.78017	10.2258	9.53276	8.05083	10.2233	13.4658	8.22102	13.1536	6.8826	7.26071	5.19352	5.61009	8.69931	5.62219	9.85285	11.6698	0	5.38894	6.2267	8.34218	8.505	5.6665	NA
chr1:169372107..169372128,+	3.66929	2.64743	3.32047	6.53742	4.14281	4.69833	2.93316	2.68361	3.57115	2.88553	2.05525	2.50544	6.14518	6.099	5.19352	0.935015	3.55074	0	3.75347	0.64832	5.10245	2.75435	6.2267	1.39036	2.43	1.51107	NA
chr1:169420823..169420842,-	3.86241	1.76495	2.92982	6.2953	3.82413	4.69833	4.1553	4.47268	7.07228	10.8207	9.10184	11.2745	10.0781	11.3267	10.387	8.64889	5.14857	3.74813	4.69184	6.4832	0	9.58034	8.30226	0	0.81	2.2666	NA
chr1:169467661..169467671,-	0.772483	0.588318	1.36725	0.0807089	0.318678	0	0	0	0	0	0.293608	0.31318	0.245807	1.16171	0.519352	2.10378	1.06522	3.74813	1.87673	3.2416	0	0	0	1.39036	0	15.4884	Mesenchymal
chr1:169467849..169467855,-	2.12433	2.94159	2.14854	0.161418	0	0	0.488859	0	0.0700226	0	2.05525	3.1318	1.72065	1.74257	2.07741	9.81765	4.26089	14.9925	7.03775	7.77984	0	1.07779	0	1.39036	1.215	14.7329	NA
chr1:169902399..169902431,+	13.1322	8.53061	9.18011	17.6753	7.96694	19.8988	18.5767	13.7162	22.4072	22.8438	17.9101	27.2467	21.3852	15.9736	25.4482	17.5315	22.5472	5.62219	23.9284	12.3181	5.10245	26.7052	22.8312	18.0747	7.29	20.2105	NA
chr1:170140761..170140767,-	11.201	11.7664	10.352	25.0198	11.7911	17.4115	14.4214	7.45447	13.0242	8.17567	27.5991	21.6094	20.1562	22.9438	33.7579	26.1804	24.5001	31.8591	18.2982	20.7462	10.2049	21.5558	14.529	25.0265	21.87	5.85538	NA
chr1:170157912..170157936,+	5.98674	3.52991	4.29707	15.9804	8.6043	8.56755	9.77719	8.94536	9.94321	9.85889	8.51463	10.3349	9.83229	10.7459	5.71287	5.61009	5.32611	0	7.03775	7.77984	0	4.67042	2.07557	27.8073	19.44	16.4328	NA
chr1:170157943..170157983,+	6.37298	2.94159	3.32047	26.9568	15.9339	17.1351	10.0216	8.94536	13.2343	12.7444	11.1571	13.4667	10.0781	11.0363	12.9838	10.2852	8.34424	7.49625	15.0139	18.8013	0	4.31115	2.07557	52.8338	65.205	15.2995	NA
chr1:17020581..17020591,+	0.965603	0.882477	0.585964	0.72638	3.18678	3.0401	2.68873	1.19271	0.140045	1.68323	2.64247	3.75816	2.94969	2.033	0	4.67507	1.24276	9.37031	3.28428	0	10.2049	6.22722	4.15113	0	1.62	0.755533	NA
chr1:170215742..170215758,+	0	0	0	0	0	0	0	0	0	0.240461	0	0.31318	0	0.580857	0	0	0	0	0.938367	0	0	0	0	13.9036	12.15	0	hepatocytes
chr1:170261004..170261032,-	3.08993	6.76566	6.44561	2.50198	1.59339	4.14559	2.68873	2.98179	2.73088	1.68323	3.52329	4.07134	7.86583	8.132	12.4644	7.24636	4.7935	5.62219	15.9522	16.8563	10.2049	2.99386	8.30226	12.5133	8.1	7.36645	NA
chr1:170352103..170352118,-	0	0	0	0	0	0	0	0.298179	0.210068	0.721382	3.22969	3.44498	3.68711	2.32343	4.67417	1.40252	0.887685	3.74813	1.40755	5.83488	0	0	0	33.3687	18.225	0	hepatocytes
chr1:170363845..170363889,+	7.72483	7.35397	6.83625	12.0256	5.09884	4.9747	3.91087	4.47268	8.82284	4.80922	5.28494	9.08222	6.8826	4.066	7.27092	5.14258	4.26089	0	4.69184	3.88992	5.10245	3.95189	2.07557	5.56145	6.885	10.0108	NA
chr1:170409089..170409129,-	0.965603	0.294159	0	0.645671	0.637355	0.552745	1.22215	0.894536	0.490158	0	1.46804	2.81862	0.491614	0.290428	0.519352	2.33754	0.532611	0	0	0	0	9.22108	2.07557	0	0	0	NA
chr1:170416236..170416276,-	12.1666	4.11823	5.07836	62.0652	24.5382	27.3609	20.0432	22.9598	49.2259	32.7027	23.4886	24.428	19.9104	29.0428	18.6967	18.934	13.4928	1.87406	2.8151	5.83488	0	44.3091	43.5869	0	0.81	2.07772	NA
chr1:170416452..170416505,+	12.3597	16.4729	14.4538	28.8131	20.0767	14.9241	17.3545	19.3816	25.9084	25.0079	13.7996	17.2249	29.0052	23.8151	18.6967	11.6877	14.9131	20.6147	28.151	10.3731	20.4098	15.9273	8.30226	16.6844	20.655	12.4663	NA
chr1:170526622..170526642,-	1.54497	1.76495	0.976607	1.69489	2.23074	0.276372	1.71101	1.78907	4.06131	2.88553	2.34886	4.07134	2.94969	4.64685	9.86768	2.10378	0.710148	1.87406	1.40755	8.42816	10.2049	1.3173	2.07557	0	0	0.377767	NA
chr1:170526847..170526855,-	0	0	0.195321	0.645671	0	0.552745	0.488859	1.49089	1.33043	0.721382	0.293608	0.31318	0.245807	0	0.519352	0	0.177537	0	0.469184	0	0	0.239509	0	0	0	0	NA
chr1:170531392..170531399,+	3.86241	1.47079	3.71111	3.87403	2.23074	3.31647	0.977719	2.38543	4.69151	5.04968	4.11051	5.63724	3.19549	5.22771	4.15481	1.40252	2.30798	0	1.40755	4.53824	5.10245	4.1914	10.3778	1.39036	1.62	1.51107	NA
chr1:170531400..170531446,+	81.3038	56.1844	55.276	126.309	54.1752	83.4645	68.1959	77.2283	113.156	116.143	115.681	126.838	87.7532	79.8678	74.7866	50.7245	34.7972	16.8666	58.1788	63.5354	40.8196	101.791	103.778	45.882	46.575	56.4761	NA
chr1:170581701..170581714,+	23.5607	29.7101	28.3216	2.09843	0.318678	1.10549	1.22215	2.68361	4.55147	6.25198	8.51463	10.9613	8.60325	11.9076	10.9064	1.87003	7.27901	3.74813	8.4453	12.9664	5.10245	0.718526	0	31.9784	21.465	10.1997	NA
chr1:170940227..170940240,-	27.23	22.9444	27.931	23.4056	8.92298	11.3313	14.9102	13.418	25.4182	13.2253	15.8548	15.9722	13.0278	14.5214	10.9064	15.6615	20.7718	7.49625	15.4831	6.4832	5.10245	17.2446	4.15113	23.6362	18.63	28.1436	NA
chr1:170958677..170958692,+	6.75922	6.4715	2.7345	0.403545	0	0.552745	0	1.19271	0.840271	1.2023	2.93608	3.1318	1.22904	1.16171	4.15481	6.31135	13.1377	9.37031	18.7673	15.5597	5.10245	5.62845	4.15113	0	0.405	1.1333	NA
chr1:171064976..171064977,+	0	0	0	0.0807089	0.318678	0	0	0.298179	0.0700226	0.240461	0	0	0.491614	0	0	0.935015	2.13044	0	0	0	0	0.359263	0	0	0	0	NA
chr1:171097606..171097610,+	5.79362	2.05911	0.976607	0.161418	0	0	0	0.298179	0.0700226	0	0.880823	0.31318	0.491614	1.16171	0	1.87003	1.59783	0	2.8151	0.64832	0	0.598771	2.07557	1.39036	0	0.377767	NA
chr1:171209037..171209043,-	0	0	0	23.4056	4.78017	4.42196	1.22215	1.19271	0.350113	0.240461	0.293608	0	0	0	0	0	0.177537	0	0	0	0	0	0	0	0	0	early
chr1:171236665..171236724,-	19.6983	25.886	30.0795	5.48821	5.41752	4.9747	3.66644	7.45447	21.2168	18.5155	29.948	44.4716	41.5414	30.7854	27.5256	8.18138	10.1196	9.37031	17.829	35.0093	71.4342	9.34083	14.529	34.7591	26.325	49.8652	NA
chr1:171236986..171237031,+	12.746	18.8262	14.2585	79.0947	31.5491	33.9938	27.865	27.1343	41.8035	46.4089	36.701	30.3785	27.5304	28.1716	32.1998	31.0892	29.6487	29.985	22.0516	35.6576	15.3073	37.4831	35.2846	6.95182	10.125	10.9552	NA
chr1:171251300..171251313,+	0.386241	0.294159	0	0.645671	0.318678	1.38186	0	2.08725	0.0700226	0.961843	0.293608	1.25272	1.22904	1.74257	3.11611	2.10378	0.177537	0	0	1.94496	0	1.67656	2.07557	0	0.405	0.188883	NA
chr1:171251788..171251798,+	0.579362	0.294159	0.585964	1.29134	1.91207	0.829117	1.46658	0.596357	0.28009	1.68323	0.587216	1.87908	0.491614	2.033	1.0387	1.87003	0.887685	0	0	1.94496	0	2.03582	4.15113	0	0.405	0	NA
chr1:171314196..171314202,-	0	0	0	0	0	0	0	0	0	0.240461	0	0	0	0	0	0	0	0	0	0	0	0	0	13.9036	12.15	0	hepatocytes
chr1:171314219..171314230,-	0	0	0	0	0	0	0	0	0	0	0	0	0	0	0	0	0.177537	0	0	0	0	0	0	20.8554	17.82	0	hepatocytes
chr1:171314249..171314259,-	0	0	0	0	0	0	0	0	0	0	0.293608	0	0	0	0	0	0	0	0.938367	0	0	0	0	624.273	750.465	0	hepatocytes
chr1:171332093..171332098,-	0.193121	0	0	0.0807089	0	0	0.488859	0	0.420135	0.961843	7.04659	8.14268	20.402	15.9736	1.55806	4.44132	11.7174	0	0	0.64832	5.10245	0.718526	0	0	0	0	middle
chr1:171447330..171447352,-	0.386241	0	0	1.04922	0.318678	1.10549	0.733289	4.1745	4.20135	3.84737	29.3608	23.8017	44.9827	47.6303	38.9514	14.259	52.0183	20.6147	9.38367	86.8749	0	4.31115	6.2267	0	0.81	0	NA
chr1:171552296..171552299,+	0	0	0	0.0807089	0.318678	0	0.488859	0.298179	0.630203	1.68323	6.16576	10.6481	9.34067	7.26071	18.6967	0	0.177537	0	4.69184	15.5597	0	0.119754	0	0	0.405	1.88883	middle_late
chr1:171575574..171575575,+	1.54497	1.17664	0.390643	0.242127	0.637355	0.552745	1.71101	1.19271	0.700226	1.68323	3.22969	1.87908	1.72065	4.066	2.59676	1.40252	0.355074	0	1.40755	1.29664	0	1.55681	4.15113	2.78073	1.62	0.755533	NA
chr1:171577739..171577750,-	16.2221	9.11893	13.6725	2.01772	0.956033	1.65823	2.93316	6.26175	5.11165	3.36645	4.99133	1.5659	2.45807	3.77557	4.15481	6.0776	4.61596	13.1184	1.87673	8.42816	5.10245	6.22722	6.2267	6.95182	0.81	8.12198	NA
chr1:171577758..171577775,-	158.166	162.082	161.336	61.5809	33.1425	48.0888	54.019	77.2283	79.5456	45.2066	57.8407	44.4716	44.7369	38.9174	12.4644	49.7895	50.0654	3.74813	15.0139	20.7462	25.5122	61.7932	33.209	65.3471	55.89	99.5415	NA
chr1:171577788..171577793,-	3.08993	1.17664	3.12514	1.53347	0.637355	2.48735	2.68873	1.49089	2.59084	2.40461	1.17443	1.87908	0.737422	0.290428	0	0.701261	1.24276	1.87406	0.469184	0.64832	0	1.19754	0	1.39036	0	1.32218	NA
chr1:171798645..171798690,+	14.0978	19.7087	12.5006	0.161418	0	0	0	0	0	0	0	0	0	0.290428	0.519352	0.935015	0.887685	0	0	0	0	0	2.07557	0	0	0	Aortic
chr1:17185899..17185920,+	16.6084	5.88318	10.5474	0.403545	0	0.276372	0.488859	0	0.140045	0	0.587216	0.62636	2.21226	2.61386	3.11611	5.84384	5.85872	0	7.97612	0.64832	0	1.55681	6.2267	0	0	4.5332	NA
chr1:17186690..17186696,+	6.95234	1.17664	1.36725	0.0807089	0	0	0	0.298179	0	0	0	0	0.245807	1.74257	0.519352	3.27255	1.77537	0	0.469184	0	0	1.19754	0	0	0	3.58878	NA
chr1:17188036..17188040,+	4.44177	0.588318	3.32047	0	0	0	0	0	0.0700226	0	0	0.93954	0.737422	0.580857	1.0387	4.44132	1.95291	5.62219	2.34592	0	0	0.598771	4.15113	0	0	1.1333	NA
chr1:171989882..171989887,+	0	0	0	0	0	0	0	0	0	0	0	0	0	0	0	0.935015	4.97103	3.74813	1.40755	0	0	0	0	0	0	0	NA
chr1:171989921..171989930,+	0	0	0.195321	0	0	0	0	0	0	0	0	0	0	0	0	2.57129	9.76453	13.1184	3.75347	0	0	0	0	0	0.405	0	NA
chr1:171990620..171990637,+	334.099	546.253	264.075	0	0	0	0	0	2.1707	2.64507	7.34019	13.7799	21.631	35.4323	80.4995	461.897	793.235	1285.61	657.795	11.0214	25.5122	21.915	29.0579	11.1229	12.15	23.2326	NA
chr1:172014704..172014708,+	1.15872	3.23575	2.14854	0	0	0	0	0	0	0	0.293608	0.31318	0.245807	0.290428	0.519352	5.84384	3.19566	7.49625	4.22265	0	0	0.479017	0	0	0.405	0.188883	NA
chr1:172066241..172066246,+	0	0	0	0.0807089	0	0.552745	0.24443	1.19271	1.89061	0.240461	0.587216	0	0	0.580857	0	0	0	0	0	0	0	0	0	0	0	0	NA
chr1:172235067..172235069,-	0	0	0	0	0	0	0	0	0	0	0	0	0	0	0.519352	1.16877	3.55074	0	0	0	0	0	0	0	0	0	NA
chr1:172272274..172272318,+	22.2089	18.532	24.2199	30.2658	9.56033	28.4664	20.5321	16.698	26.8186	17.5536	11.7443	20.3567	13.5194	12.4884	12.4644	11.2202	16.6885	7.49625	12.1988	14.9114	15.3073	14.4903	12.4534	8.34218	11.745	16.8106	NA
chr1:172272325..172272335,+	2.89681	0.882477	1.36725	3.22836	2.8681	3.0401	2.68873	2.08725	1.96063	1.68323	1.76165	1.25272	0.983229	0.871285	3.63546	0.233754	2.13044	3.74813	1.87673	1.94496	0	2.99386	4.15113	0	0	1.51107	NA
chr1:172318405..172318436,-	46.9283	31.1808	35.3532	29.5395	19.4393	29.0191	24.6874	22.9598	19.5363	19.9582	18.7909	20.0435	7.37422	10.7459	14.0225	11.6877	10.6522	18.7406	10.322	14.263	5.10245	18.0829	20.7557	12.5133	6.075	18.1328	NA
chr1:172318480..172318530,+	57.3568	80.3054	70.5111	18.0788	15.6152	18.517	18.3322	23.8543	25.7683	28.6148	29.3608	27.873	22.8601	29.0428	27.5256	14.7265	17.9312	26.2369	35.6579	27.8778	20.4098	11.3767	22.8312	51.4434	31.995	48.7319	NA
chr1:172362501..172362518,+	11.7804	17.6495	12.5006	3.79332	4.14281	3.59284	4.64416	4.77086	4.48144	3.36645	4.11051	4.6977	1.96646	6.099	10.9064	1.63628	3.01813	3.74813	4.22265	6.4832	0	0.718526	4.15113	0	0	2.64437	NA
chr1:172362531..172362571,+	20.6639	20.5911	14.2585	9.68507	0.956033	2.21098	2.68873	4.77086	9.38303	1.92369	2.64247	3.1318	0.983229	2.033	3.11611	2.57129	4.26089	0	3.75347	1.94496	5.10245	0.718526	0	0	0.81	6.61091	NA
chr1:172413176..172413186,+	0.193121	0.294159	0.195321	0.242127	0.637355	0	0	0	0.140045	0	0	0	0	0	0	0	0	0	0	0	0	0	0	0	0	0.188883	NA
chr1:172413204..172413216,-	8.11107	3.23575	4.88304	0.968507	1.59339	1.65823	1.71101	1.19271	1.05034	0.721382	0.587216	0.62636	0.737422	0.290428	1.0387	0.467507	0.355074	0	0	0	0	0.239509	2.07557	0	0.81	1.51107	NA
chr1:172413272..172413344,-	61.6055	49.7129	35.1579	26.6339	21.0327	27.6372	27.1317	25.6434	26.9587	27.8935	17.0293	15.3458	21.8768	18.5874	21.2934	7.24636	16.866	5.62219	16.4214	13.6147	10.2049	13.652	8.30226	8.34218	10.53	37.3989	NA
chr1:172504093..172504096,+	0	0	0	0	0	0	0	0	0	0	0	0	0	0	0	0	0	0	0	0	0	0	0	0	0	0	NA
chr1:172574255..172574271,-	0	0	0	65.1321	10.835	16.0296	5.13302	1.19271	1.33043	1.2023	0.293608	0	0	0	1.0387	0	0.177537	0	0.469184	0	0	0	0	0	0	0	early
chr1:172574546..172574556,-	0	0	0	6.13388	0.956033	1.38186	0	0.596357	0.0700226	0	0	0	0	0	0	0	0	0	0	0	0	0	0	0	0	0	NA
chr1:172574557..172574564,-	0	0	0	2.82481	0.637355	0.829117	0.733289	0.596357	0	0	0	0	0	0	0	0	0	0	0	0	0	0	0	0	0	0	NA
chr1:172574585..172574594,-	0	0	0	5.16537	0	0.276372	0	0.298179	0.210068	0	0	0	0	0	0	0	0	0	0	0	0	0	0	0	0	0	NA
chr1:172574602..172574603,-	0	0	0	1.12992	0	0	0.24443	0	0	0	0	0	0	0	0	0	0	0	0	0	0	0	0	0	0	0	NA
chr1:172613398..172613442,+	22.9814	25.2977	25.3918	11.6221	6.05488	7.18568	12.4659	10.1381	16.3853	17.3132	11.1571	11.9008	8.11164	9.29371	7.79028	3.0388	8.69931	5.62219	12.668	7.77984	5.10245	2.39509	4.15113	27.8073	20.655	22.2882	NA
chr1:172613452..172613467,+	5.02114	7.64813	3.71111	3.95474	2.23074	3.59284	3.91087	3.87632	5.18167	5.5306	5.87216	3.75816	5.40776	1.45214	2.07741	0.935015	1.06522	5.62219	3.75347	4.53824	0	0.83828	0	6.95182	8.505	2.83325	NA
chr1:172685176..172685177,+	0	0	0	0	0	0	0	0	0	0	0	0	0	0	0.519352	0	0	0	0	0	0	0	0	1.39036	0	0	NA
chr1:172697252..172697291,+	38.2379	38.829	17.5789	28.1674	10.1977	8.84392	7.57732	10.7344	16.7354	15.3895	22.9014	18.7908	18.1897	22.363	33.7579	27.3492	22.5472	20.6147	32.8428	50.569	10.2049	2.8741	0	0	0	9.63305	NA
chr1:172697304..172697311,+	1.93121	3.52991	0.781286	0.887798	0.318678	0.276372	0.488859	0.894536	2.24072	0.721382	3.22969	2.81862	0.737422	0.580857	2.59676	0.935015	1.59783	0	0.938367	1.94496	0	0.359263	0	0	0	0.56665	NA
chr1:172697314..172697328,+	4.05553	3.23575	0.390643	2.42127	0.956033	1.65823	1.22215	4.77086	3.92126	4.80922	9.98266	10.0218	2.70388	5.51814	9.86768	5.37633	3.01813	3.74813	7.03775	18.153	0	0.479017	4.15113	0	0	1.1333	NA
chr1:172697459..172697470,+	0.772483	0	0.390643	5.16537	2.54942	2.48735	2.68873	2.68361	3.36108	3.84737	1.76165	0.31318	0.491614	0	0.519352	1.16877	0.355074	0	0.469184	0	0	0.83828	0	0	0	0	NA
chr1:172836452..172836455,-	0	0	0	0	0	0	0	0	0	0	0	0	0	0	0	0	0	0	0	0	0	0	0	0	0	0	NA
chr1:172867034..172867043,+	0.193121	0	0	0	0	0	0	0	0	0	0	0	0.245807	1.74257	1.55806	4.90883	5.68118	11.2444	7.97612	0	0	0.239509	0	0	0	0	late
chr1:173012949..173012953,-	0	0	0	0	0	0	0	0	0	0	0	0	0	0	0	0	0	0	0	0	0	0	0	0	0	0	NA
chr1:173029243..173029244,-	0	0.294159	0	0	0.318678	0	0	0	0	0	0	0	0.737422	0	0.519352	1.40252	0.177537	0	2.34592	0	0	1.79631	0	0	0	0	NA
chr1:173156082..173156116,+	2.31745	0	2.14854	0.403545	0	0.276372	0.24443	0	0.0700226	0	2.93608	8.14268	17.9439	18.297	30.1224	77.3725	33.5545	13.1184	16.4214	4.53824	0	18.3224	29.0579	0	0	0.188883	middle_late
chr1:173479800..173479840,-	0.579362	0.588318	0.976607	1.7756	2.23074	1.65823	0.488859	0.596357	1.61052	0.480922	0.880823	1.5659	3.68711	5.80857	9.34833	12.1552	14.9131	18.7406	21.5824	5.83488	0	8.26305	12.4534	0	0.405	1.88883	NA
chr1:17360967..17360970,+	0.965603	0.294159	0.781286	0	0	0	0	0	0	0	0	0	0.491614	0.580857	1.55806	4.44132	0.355074	0	1.40755	0.64832	0	0.359263	2.07557	0	0.405	0.755533	NA
chr1:173899917..173899922,-	0	0	0	3.14765	0	0.276372	0.24443	0.894536	0.490158	0.240461	0	0	0	0.580857	0	0	0	0	0	0	0	0.239509	0	0	0	0.188883	NA
chr1:173899957..173899994,-	5.02114	2.05911	4.29707	53.6714	25.4942	36.7575	35.9312	27.7306	35.0813	37.9928	23.4886	13.4667	8.84906	12.4884	12.9838	11.4539	8.1667	1.87406	6.56857	9.07648	0	32.2139	16.6045	4.17109	3.24	5.47761	NA
chr1:173899996..173900035,-	7.53171	4.11823	6.83625	48.4253	37.604	36.7575	30.3093	32.7997	30.88	31.9813	16.7356	20.6699	9.34067	9.87457	7.27092	6.0776	7.98916	13.1184	8.4453	5.83488	0	21.0768	18.6801	1.39036	1.62	3.58878	NA
chr1:173931660..173931665,+	0	0	0	0	0	0.276372	0	0.894536	2.03065	6.01152	0.293608	0	0	0.290428	1.0387	0	0	0	0	0.64832	0	0	0	0	0	0	NA
chr1:173937382..173937389,+	2.12433	3.52991	2.53918	0	0	0	0	0	0.210068	0	0.587216	0	0.737422	0.580857	0.519352	0.701261	0.355074	0	1.87673	2.59328	0	0	0	0	0	0	NA
chr1:173937413..173937422,+	4.05553	0.882477	4.49239	0	0	0	0	0	0	0	0.587216	0.93954	0.983229	0.580857	1.0387	0	0.532611	5.62219	1.40755	5.18656	0	0	0	0	0.405	0	NA
chr1:174109434..174109445,+	2.12433	1.47079	2.92982	0.0807089	0	0.276372	0.977719	1.49089	2.59084	2.16415	2.34886	1.25272	0.737422	1.45214	2.07741	0.701261	0.887685	0	3.28428	6.4832	5.10245	0.359263	0	2.78073	0.405	0.377767	NA
chr1:174155394..174155407,+	32.8305	47.9479	38.4783	0.0807089	0	0.276372	0	0	0.0700226	0.480922	0	0.93954	0.245807	2.61386	3.63546	6.77886	20.4167	18.7406	15.4831	1.94496	0	0.598771	0	1.39036	0.81	27.1992	NA
chr1:174205504..174205534,+	0	0.294159	0	0	0	0	0	0	0	0	0	0	0	0	0	0.935015	0.710148	3.74813	1.40755	0	0	0	0	48.6627	37.665	0.188883	hepatocytes
chr1:174291649..174291655,-	0	0	0	0	0	0	0.488859	1.78907	1.40045	3.84737	4.69772	7.8295	6.14518	2.90428	2.59676	0.701261	1.06522	1.87406	6.56857	16.208	214.303	0	0	0	0	0	extraembryonic
chr1:174380926..174380927,+	2.12433	2.05911	1.95321	0.161418	0	0	0	0	0	0	1.17443	2.50544	0.983229	0.871285	0	0.701261	0.355074	0	0.469184	0	0	0.598771	0	0	0	0.944416	NA
chr1:174492191..174492209,-	1.15872	2.94159	1.56257	6.13388	3.50545	2.48735	2.68873	4.47268	5.67183	4.32829	3.22969	4.38452	2.94969	2.61386	3.63546	6.31135	8.52177	3.74813	3.28428	3.88992	0	7.18526	6.2267	0	0	2.2666	NA
chr1:174492216..174492244,-	9.84915	11.4722	9.37543	22.5178	10.835	12.1604	11.4882	14.6108	17.7857	13.2253	12.3315	11.5877	11.0613	10.7459	11.4257	13.324	24.5001	3.74813	14.0755	9.07648	0	19.6397	20.7557	4.17109	4.05	13.0329	NA
chr1:174492250..174492268,-	8.88355	14.1196	10.1567	18.4823	7.96694	8.56755	7.82175	8.349	16.8054	12.7444	10.8635	12.8404	6.8826	7.84157	12.4644	15.194	23.6124	9.37031	13.1371	9.7248	0	12.4544	10.3778	9.73254	4.455	13.9774	NA
chr1:174502544..174502546,+	0	0.294159	0	1.37205	0.637355	0.276372	0.24443	0	0	0	0	0	0	0	0	0	0	0	0	0	0	0	0	0	0	0	NA
chr1:174502615..174502665,+	9.84915	11.4722	11.9146	20.2579	7.64827	6.08019	6.11074	11.629	9.87318	10.8207	7.6338	8.45586	6.8826	6.97028	10.9064	4.67507	9.76453	7.49625	10.322	7.77984	5.10245	6.58649	6.2267	13.9036	8.505	8.49975	NA
chr1:174548106..174548179,+	33.2168	60.5967	35.3532	4.03545	1.91207	3.59284	11.9771	43.5341	79.2656	95.9439	127.426	155.337	119.954	146.957	138.667	8.88264	16.5109	9.37031	17.3598	148.465	61.2293	6.70624	4.15113	367.056	306.18	98.786	NA
chr1:174597301..174597347,-	6.5661	3.52991	6.83625	24.6969	15.9339	12.9895	12.4659	20.2762	23.8077	18.275	19.0845	16.2854	8.84906	14.8118	14.0225	8.88264	9.94207	5.62219	8.91449	24.6362	5.10245	22.1545	22.8312	2.78073	4.86	2.83325	NA
chr1:174599407..174599412,+	0	0	0	20.3386	5.09884	8.84392	4.64416	1.78907	0.490158	0.240461	0	0.31318	0.245807	0.290428	0	0	0	0	0	0	0	0	0	0	0	0	early
chr1:174768008..174768015,-	0.579362	0.882477	2.34386	0.807089	0	0.552745	0.488859	0	0.140045	0.721382	0.587216	0.31318	0.983229	1.45214	0.519352	1.63628	2.30798	3.74813	9.38367	1.29664	5.10245	0.83828	0	23.6362	17.82	4.34432	hepatocytes
chr1:174768784..174768785,-	1.73809	4.11823	2.7345	0.322836	1.27471	1.65823	1.71101	2.38543	0.560181	5.77106	5.28494	9.3954	1.47484	5.51814	11.9451	0.701261	0.532611	0	1.40755	0	0	3.11361	12.4534	12.5133	5.265	1.51107	NA
chr1:174792987..174792996,-	0	0	0	0	0	0	0	0	1.19038	0.721382	1.76165	1.5659	4.67034	2.32343	2.59676	0	0	1.87406	0	5.83488	0	0.239509	0	0	0	0	NA
chr1:174999249..174999288,-	5.6005	4.41238	5.66432	2.17914	0.637355	2.21098	1.46658	2.38543	5.18167	5.04968	4.11051	6.88996	4.42453	6.38942	4.67417	5.14258	5.14857	1.87406	2.34592	1.29664	0	3.23337	6.2267	1.39036	2.43	5.85538	NA
chr1:175014515..175014528,+	5.6005	3.23575	4.68772	3.30907	1.59339	1.93461	1.46658	1.19271	2.38077	2.40461	0.880823	2.50544	1.47484	2.61386	2.59676	1.16877	1.77537	3.74813	1.40755	2.59328	0	3.47287	0	1.39036	0	4.15543	NA
chr1:175014545..175014564,+	4.24865	2.05911	2.7345	7.90947	3.18678	1.93461	4.64416	3.87632	10.3633	8.17567	5.87216	4.38452	4.42453	3.19471	4.15481	2.57129	3.19566	1.87406	1.87673	3.2416	0	10.5384	8.30226	1.39036	0.405	2.83325	NA
chr1:175014566..175014581,+	4.44177	2.35327	2.7345	20.2579	6.69223	7.73843	7.82175	9.8399	16.7354	16.5918	10.8635	8.45586	9.83229	5.80857	4.15481	5.84384	5.85872	7.49625	7.03775	4.53824	0	11.9754	10.3778	1.39036	0	1.88883	NA
chr1:175014600..175014618,+	8.30419	3.82407	7.03157	181.918	63.0982	113.589	48.3971	71.5629	92.2197	73.8215	18.7909	28.1862	11.3071	10.4554	7.79028	4.67507	7.27901	3.74813	7.03775	5.83488	0	14.61	14.529	1.39036	0.81	3.77767	NA
chr1:175096213..175096250,-	0.193121	0	0	0	0	0	0.24443	0	0.0700226	0.721382	0.293608	0.93954	0.491614	1.74257	1.0387	5.84384	5.50364	3.74813	9.85285	1.94496	0	0	0	0	2.835	406.099	Mesenchymal
chr1:175117868..175117896,-	2.70369	2.35327	4.10175	12.5906	5.7362	5.52745	3.17759	2.68361	4.48144	2.64507	3.22969	3.1318	1.47484	2.033	5.71287	4.90883	2.13044	0	2.34592	2.59328	0	4.43091	4.15113	4.17109	1.215	3.58878	NA
chr1:175117899..175117902,-	0.579362	0.294159	0.195321	2.7441	0.318678	1.38186	0.488859	0.596357	0.980316	0	0.880823	0.62636	0.737422	0.290428	0.519352	0.233754	0.177537	0	0	1.29664	0	1.19754	2.07557	0	0.405	0.755533	NA
chr1:175117907..175117913,-	0.193121	0.294159	0.585964	4.03545	0.956033	0.552745	0.24443	0.596357	1.12036	0.480922	1.17443	0.62636	0.245807	0.871285	0	0.935015	0.355074	0	0.469184	0	0	1.07779	0	0	0	0	NA
chr1:175117916..175117934,-	3.28305	3.52991	5.66432	13.7205	5.09884	5.25108	3.17759	3.57814	6.93224	4.08783	1.46804	5.01088	3.4413	4.066	6.23222	4.20757	4.26089	0	4.69184	3.2416	0	4.67042	4.15113	6.95182	2.025	6.42203	NA
chr1:175117936..175117945,-	0.772483	0.294159	1.17193	3.22836	0.318678	1.10549	0	1.19271	0.910293	1.68323	0.293608	0.62636	0.491614	0.580857	0.519352	0	1.59783	3.74813	2.34592	0	0	1.19754	2.07557	0	1.62	0.56665	NA
chr1:175117975..175117985,-	2.12433	2.35327	1.75789	4.03545	1.27471	1.10549	0.488859	0.894536	2.03065	2.88553	0.587216	2.19226	1.72065	1.74257	3.63546	0.935015	2.48552	0	2.8151	0.64832	5.10245	2.75435	0	2.78073	0.81	4.15543	NA
chr1:175163066..175163086,+	88.063	88.5418	84.9649	218.802	133.845	171.351	186.5	225.721	243.959	251.762	218.738	179.139	166.166	178.323	231.112	188.639	173.276	110.57	133.248	254.79	35.7171	245.975	186.801	43.1013	35.64	105.397	NA
chr1:175163095..175163115,+	101.002	47.9479	69.3391	268.438	201.723	249.564	251.518	278.201	357.325	312.599	306.527	269.335	265.226	261.095	358.353	290.79	292.581	134.933	125.272	313.139	30.6147	419.739	469.078	87.5929	61.965	89.9084	NA
chr1:175163118..175163133,+	64.8885	45.3005	42.1894	217.511	149.46	208.385	198.477	243.016	270.217	285.427	261.605	233.319	206.724	221.016	263.311	244.273	178.957	91.8291	67.0932	228.209	5.10245	428.361	338.317	65.3471	39.285	45.332	NA
chr1:175163138..175163142,+	7.14546	3.82407	5.07836	28.8131	22.6261	28.7427	32.2647	34.8869	36.1316	44.0043	34.0585	31.0048	27.0388	27.8811	36.3546	26.4142	22.3697	14.9925	8.4453	33.7127	0	58.4401	62.267	4.17109	4.86	4.34432	NA
chr1:175163632..175163658,+	0.193121	0	0	0.161418	0	0	0	0.298179	0.560181	0	0.293608	0.31318	0.245807	0.290428	0.519352	0	0.177537	0	0	0	0	0.119754	0	0	0	0.377767	NA
chr1:175164076..175164102,+	4.82802	6.4715	8.59415	6.05317	7.96694	5.25108	5.13302	7.45447	8.12262	9.85889	4.69772	6.57678	4.67034	6.97028	12.9838	10.9864	4.61596	3.74813	7.97612	20.0979	5.10245	2.63459	0	18.0747	14.58	6.04426	NA
chr1:175165641..175165648,+	0.193121	0.294159	0.195321	0.322836	0.318678	0.276372	0.733289	0.298179	0.490158	0.721382	1.17443	0.31318	0	0.871285	1.0387	0.701261	0.177537	0	0	1.94496	0	2.75435	2.07557	0	0	0.188883	NA
chr1:175165667..175165679,+	0.193121	0.588318	0.195321	1.12992	1.27471	1.10549	2.4443	1.78907	1.47047	0.961843	2.64247	1.25272	0.491614	1.16171	2.07741	0.935015	0.887685	0	0.938367	1.29664	0	5.26919	0	0	0.405	0.755533	NA
chr1:175167105..175167114,+	0.386241	0.588318	0	0.484253	0	1.65823	0.977719	2.08725	0.840271	1.68323	1.76165	2.19226	1.22904	0.580857	0	2.57129	0.887685	1.87406	0	0	0	4.1914	2.07557	0	0	0.56665	NA
chr1:175167139..175167148,+	0.386241	1.17664	0.195321	1.04922	1.91207	2.76372	3.17759	3.27997	0.560181	4.08783	1.76165	0.31318	2.94969	2.033	1.55806	1.87003	0.177537	0	0.938367	0	0	5.14943	0	0	0	0.377767	NA
chr1:175167163..175167176,+	0.579362	0.882477	0.781286	7.34451	6.37355	8.0148	10.7549	10.7344	11.0636	13.2253	4.69772	6.2636	5.65357	5.51814	5.19352	5.14258	2.30798	0	0.469184	4.53824	0	13.0532	6.2267	1.39036	2.025	1.51107	NA
chr1:175167182..175167203,+	4.44177	6.17734	4.29707	6.376	10.835	9.67304	11.7326	16.1017	6.79219	17.5536	12.6251	16.9117	8.11164	7.55114	7.79028	10.9864	4.61596	1.87406	3.28428	5.83488	0	21.0768	18.6801	2.78073	3.24	5.28873	NA
chr1:175169514..175169532,+	0	0	0	0.242127	0.318678	0.829117	0.24443	1.19271	0.350113	0.961843	0.880823	0.31318	0.491614	0.871285	2.59676	1.16877	0.887685	0	3.75347	0.64832	0	0.958034	2.07557	0	0	0.188883	NA
chr1:175169788..175169798,+	1.54497	0.294159	0.585964	0.242127	0.318678	0.829117	0.488859	1.19271	0.140045	0.961843	1.17443	1.5659	0.983229	1.74257	1.55806	2.33754	0.710148	0	0.469184	1.94496	0	3.71238	4.15113	0	0.81	0.56665	NA
chr1:175170032..175170037,+	6.17986	2.05911	1.95321	3.79332	3.82413	4.14559	4.88859	2.38543	5.04163	6.7329	8.80823	5.95042	2.21226	9.00328	4.15481	7.71387	7.63409	0	0.938367	3.2416	0	13.0532	0	1.39036	2.025	3.96655	NA
chr1:175170789..175170793,+	0.965603	0.294159	0.390643	0.161418	0.318678	0	0.977719	0.596357	0.210068	0	2.05525	0.93954	0.737422	0.871285	1.0387	1.16877	0.355074	1.87406	0	1.29664	0	2.75435	2.07557	0	0.405	0	NA
chr1:175170972..175170974,+	2.51057	1.47079	1.17193	0.645671	0.637355	4.14559	1.22215	2.98179	0.560181	4.08783	4.99133	6.88996	5.65357	6.67985	4.67417	6.77886	3.01813	0	0	0	0	9.7001	8.30226	2.78073	0.81	0.944416	NA
chr1:175340287..175340297,+	4.6349	2.64743	4.49239	4.60041	3.50545	2.76372	7.08846	2.98179	5.25169	7.45428	2.64247	2.81862	3.68711	1.74257	4.67417	0.935015	1.77537	0	3.28428	1.94496	0	0.598771	0	4.17109	5.67	5.85538	NA
chr1:175340317..175340329,+	19.5052	21.1794	38.0877	5.00395	3.18678	7.46206	6.5996	15.8035	9.24298	19.7178	11.7443	6.57678	14.2568	9.87457	14.0225	7.94762	10.2971	7.49625	31.4353	27.2294	5.10245	6.10747	10.3778	16.6844	17.82	37.9655	NA
chr1:175340512..175340539,+	11.0079	18.532	26.1731	2.25985	1.27471	1.65823	0.488859	0.894536	2.45079	2.16415	1.46804	3.1318	2.21226	4.35643	9.34833	1.87003	8.87685	5.62219	10.7912	5.83488	20.4098	0.479017	6.2267	4.17109	8.1	19.6439	NA
chr1:175340544..175340559,+	9.26979	12.3547	14.2585	0.484253	0	0	0.24443	0.894536	1.05034	0.240461	2.05525	1.87908	1.96646	1.16171	1.55806	1.63628	2.48552	0	4.22265	0	0	0	0	1.39036	1.62	7.9331	NA
chr1:175340803..175340815,+	11.3941	5.58902	15.821	0.0807089	0	0	0.488859	0	0.350113	0.721382	0.293608	0.31318	0.245807	0.290428	0	0	0.177537	1.87406	2.34592	0	0	0.119754	0	0	0.81	4.34432	NA
chr1:175340835..175340845,+	4.82802	1.76495	4.88304	0.322836	0.318678	0	0.24443	0	0.420135	0.240461	0	0.62636	0.245807	0.290428	0.519352	0	0.355074	0	0.938367	0.64832	0	0	0	0	1.215	3.96655	NA
chr1:175340877..175340884,+	4.44177	3.52991	3.71111	0.564962	0	0	0	0	0.0700226	0	0	0	0.737422	0.290428	0.519352	0	0.355074	0	0	0	0	0	0	9.73254	1.62	1.88883	NA
chr1:175430348..175430355,+	0	0	0	0	0	0	0	0	0	0	0	0	0	0	0	0	0	0	0	0	0	0	0	0	0	0	NA
chr1:175440053..175440088,+	17.9602	41.4764	15.2351	10.3307	8.6043	7.46206	8.06618	8.94536	18.0658	8.65659	10.5699	9.3954	8.35744	10.4554	7.27092	5.84384	11.1848	1.87406	8.91449	7.13152	5.10245	10.4186	6.2267	1.39036	1.62	16.8106	NA
chr1:175440110..175440117,+	1.54497	2.64743	0.976607	0.322836	0	0	0.24443	0	0.770248	0.480922	0.293608	0.62636	0.491614	0.871285	0	0.467507	3.01813	1.87406	2.8151	0	0	0.359263	0	0	0.405	0.377767	NA
chr1:175782726..175782745,+	0	0	0	0.564962	0.637355	0	0	0.298179	0.420135	0.240461	0.293608	0	0.737422	0.580857	0	0.701261	0.532611	9.37031	5.16102	1.94496	25.5122	0.239509	0	13.9036	3.645	32.299	NA
chr1:175806047..175806076,-	192.734	155.316	179.305	135.672	87.955	131.553	119.282	115.992	112.876	154.376	203.47	174.128	129.295	128.95	99.1962	123.889	53.6162	82.4588	83.0455	116.698	51.0245	177.117	151.516	111.229	88.695	126.363	NA
chr1:175806079..175806087,-	26.8438	18.532	21.4854	21.4686	14.0218	19.0697	16.6212	17.5925	16.0352	20.6796	28.48	21.2962	17.4523	19.7491	13.5031	10.7527	6.56887	14.9925	15.9522	25.2845	15.3073	13.5322	41.5113	22.2458	15.795	14.7329	NA
chr1:175837275..175837280,+	0	0	0.195321	0.242127	0.318678	0.552745	0.488859	2.08725	2.94095	3.36645	9.98266	9.70858	8.60325	6.38942	6.23222	2.10378	4.26089	7.49625	19.7057	9.7248	0	3.11361	4.15113	1.39036	2.43	109.175	Mesenchymal
chr1:175904194..175904195,+	0	0	0	0	0	0	0	0	0	0	0.880823	0	0.983229	0.290428	0	0.233754	0	0	0	0	0	0.119754	0	0	0	2.07772	NA
chr1:176054412..176054415,+	0	0	0	0	0	0	0	0	0	0	0	0	0	0	0	0	0	0	0	0	0	0	0	0	0	0	NA
chr1:176067459..176067479,+	0	0	0	98.8684	140.218	183.788	356.134	518.533	679.639	549.212	318.858	263.698	173.786	141.148	91.4059	0	0.355074	3.74813	8.4453	141.334	0	0	0	0	0	0	NA
chr1:176067511..176067530,+	0	0	0	66.0199	62.1422	87.3337	183.567	297.881	389.045	442.207	342.053	360.157	193.942	179.194	131.396	0	0.887685	16.8666	22.5208	236.637	81.6391	0.119754	0	0	0	0	NA
chr1:176067837..176067845,+	0	0	0	0.403545	0.318678	0.552745	1.71101	1.78907	1.96063	3.36645	1.17443	0.31318	2.70388	1.74257	1.55806	0	0	0	0	0	5.10245	0	0	0	0	0	NA
chr1:176067861..176067872,+	0	0	0	0.403545	0	0.276372	2.93316	3.87632	2.52081	7.93521	7.34019	0.62636	3.68711	4.066	2.59676	0	0	0	0.469184	1.29664	0	0	0	0	0	0	NA
chr1:176069264..176069275,+	0	0	0	0.807089	0.956033	0.276372	1.95544	2.68361	3.78122	5.04968	3.52329	3.1318	2.21226	2.32343	3.11611	0	0	0	0	2.59328	0	0	0	0	0	0	NA
chr1:176069420..176069439,+	0	0	0	2.58269	1.59339	1.93461	2.19987	3.57814	5.04163	12.2635	4.40412	15.3458	0.491614	5.80857	6.23222	0	0	0	0	6.4832	0	0	0	0	0	0	NA
chr1:176070790..176070795,+	0	0	0	1.12992	3.18678	2.48735	4.88859	6.85811	4.06131	6.49244	1.17443	1.87908	0.737422	0.871285	2.07741	0	0	0	0.469184	1.94496	0	0	0	0	0	0	NA
chr1:176116003..176116005,-	0	0	0	6.77955	5.09884	8.84392	6.11074	0	0.210068	0.240461	0	0	0.245807	4.066	7.27092	0.935015	0.355074	0	0.938367	0	0	0	0	0	0	0	NA
chr1:176116412..176116425,+	2.51057	0	1.36725	2.50198	2.23074	3.0401	1.71101	2.38543	3.64117	3.84737	3.22969	6.57678	3.93291	2.61386	0	2.10378	1.59783	0	0	1.29664	0	3.47287	0	0	0	0.944416	NA
chr1:176170845..176170899,-	30.8993	31.7692	31.8374	162.225	54.4939	59.1437	51.0858	47.1122	62.5302	75.9856	26.1311	38.5212	30.9717	30.2046	29.0837	19.6353	27.5182	20.6147	32.3737	41.4925	40.8196	27.1842	16.6045	36.1494	24.3	28.7103	NA
chr1:176170911..176170924,-	1.35184	1.76495	2.53918	20.0158	7.01091	3.86921	6.84403	6.26175	6.58212	8.41613	1.17443	3.1318	1.96646	2.32343	1.0387	0.935015	1.95291	0	2.8151	2.59328	0	1.67656	2.07557	4.17109	2.025	1.88883	NA
chr1:176171166..176171195,+	2.51057	2.64743	3.71111	4.60041	3.18678	4.42196	4.64416	5.36722	4.62149	5.29014	1.76165	4.07134	1.22904	2.32343	2.07741	1.40252	4.08335	1.87406	1.87673	1.94496	5.10245	1.79631	2.07557	2.78073	2.835	3.77767	NA
chr1:176273674..176273699,+	10.8148	11.7664	11.7193	7.99018	5.09884	4.42196	6.35517	5.06904	10.0132	7.21382	9.10184	10.9613	4.91614	5.51814	7.27092	6.31135	6.56887	0	6.09939	3.88992	10.2049	6.58649	4.15113	50.0531	21.87	9.63305	NA
chr1:176283539..176283550,-	0	0.294159	0.390643	4.84253	2.23074	2.21098	0.733289	0.298179	2.03065	1.68323	0.880823	0	1.22904	1.16171	0	0.701261	0	0	0.469184	0.64832	0	0.479017	0	0	0	0	NA
chr1:176283568..176283581,-	0.386241	0.294159	0.585964	4.84253	1.59339	5.52745	0.488859	1.78907	3.43111	3.36645	0.880823	2.19226	0.245807	2.32343	0	0.233754	0.532611	1.87406	1.87673	1.94496	0	1.79631	2.07557	0	0.405	0.188883	NA
chr1:176283692..176283702,-	1.35184	0.588318	0.976607	1.21063	0.637355	1.93461	2.68873	0.894536	3.92126	3.84737	1.17443	1.25272	0.737422	0.580857	1.0387	0.233754	0.532611	0	0	0.64832	0	0.598771	0	0	0	1.32218	NA
chr1:176283729..176283753,-	17.1877	11.178	10.938	22.5985	10.1977	18.517	23.2208	26.8361	32.9806	25.2484	12.9187	14.7195	12.2904	12.4884	12.4644	9.11639	13.3153	0	5.16102	10.3731	5.10245	16.1668	16.6045	9.73254	9.71999	15.8662	NA
chr1:176283759..176283795,-	12.5528	9.70725	15.821	13.7205	5.7362	12.7131	13.4436	13.7162	22.8274	22.1224	11.1571	14.4063	12.5362	13.3597	11.4257	6.77886	10.4747	3.74813	3.75347	14.263	0	14.3705	18.6801	6.95182	6.075	13.9774	NA
chr1:176298591..176298595,+	0	0	0	0	0	0	0	0	0	0	0	0	0	0	0	0.233754	0	1.87406	0.938367	0	0	0	0	38.9302	16.605	0	hepatocytes
chr1:176298730..176298743,-	0	0	0	0.161418	0.318678	0.829117	1.22215	1.49089	3.01097	0.961843	0	0.31318	0	0	0	0	0	0	0	0	0	0	0	0	0	0	NA
chr1:176337811..176337813,-	0.193121	0	0.585964	0.484253	0.318678	1.38186	0.488859	0.298179	0.490158	0	0.880823	0.62636	0	0.580857	0	0	1.24276	0	0.469184	0	0	1.67656	2.07557	0	0	0.188883	NA
chr1:176339019..176339042,+	17.574	5.88318	7.03157	0.807089	1.27471	1.93461	2.68873	0.894536	0.840271	0.721382	2.64247	2.81862	1.72065	1.74257	0.519352	1.87003	3.3732	1.87406	0.469184	0	0	3.71238	0	16.6844	2.835	1.51107	NA
chr1:176339837..176339854,-	5.40738	5.58902	5.27368	1.21063	8.6043	10.2258	9.0439	10.1381	0.560181	11.0612	10.8635	13.4667	10.8155	13.3597	9.34833	13.0902	1.4203	14.9925	13.1371	23.3395	5.10245	10.1791	16.6045	12.5133	1.62	0.944416	NA
chr1:176339862..176339872,-	0.193121	0.588318	0.195321	0.161418	1.59339	2.76372	1.22215	4.1745	0.140045	8.41613	5.57855	2.50544	3.4413	4.066	4.15481	3.0388	0.532611	0	7.50694	2.59328	5.10245	3.71238	6.2267	1.39036	2.025	0.188883	NA
chr1:176339895..176339910,-	3.28305	5.0007	1.36725	0.564962	6.37355	4.42196	8.31061	14.3126	0.910293	25.0079	9.10184	6.57678	8.60325	12.4884	3.63546	11.4539	0.887685	11.2444	6.09939	11.0214	10.2049	7.90378	8.30226	2.78073	3.24	1.51107	NA
chr1:176340840..176340853,-	1.54497	0.588318	0.781286	0.322836	1.27471	2.21098	2.93316	2.68361	0.700226	6.49244	2.64247	2.19226	0.983229	3.77557	1.55806	2.10378	0.177537	5.62219	0.469184	4.53824	5.10245	2.39509	4.15113	0	1.215	0.188883	NA
chr1:176340866..176340882,-	4.05553	3.52991	2.14854	1.53347	4.78017	5.80382	6.11074	7.75265	2.03065	16.5918	9.68906	10.3349	9.34067	7.26071	7.79028	10.2852	1.77537	14.9925	8.4453	14.263	0	9.58034	6.2267	5.56145	0.81	1.32218	NA
chr1:176341480..176341494,-	8.11107	7.35397	5.07836	3.38977	5.09884	8.0148	13.4436	15.8035	4.69151	10.0994	13.7996	18.1644	8.60325	17.1353	18.1773	24.5441	4.61596	29.985	10.322	31.1194	10.2049	18.5619	14.529	2.78073	5.265	2.07772	NA
chr1:176342472..176342484,-	138.661	118.84	145.905	179.9	192.481	278.031	273.517	261.503	201.875	472.505	389.618	455.99	215.081	257.32	161.518	299.672	93.562	73.0884	26.7435	227.56	0	457.94	361.148	84.8122	82.62	75.3644	NA
chr1:176342496..176342508,-	604.274	690.097	729.916	265.371	341.623	472.044	472.971	490.504	272.248	694.932	1222.88	1232.68	1028.95	1211.96	1155.04	1418.18	905.616	341.079	135.125	1715.46	214.303	1123.53	1052.31	1375.07	620.055	294.091	NA
chr1:176553452..176553453,+	0	0	1.36725	0	0.637355	0.552745	1.46658	0.894536	0.28009	1.68323	1.17443	0.31318	1.96646	3.48514	0.519352	0.467507	0.532611	1.87406	0	0	5.10245	0.359263	0	0	0.405	0.377767	NA
chr1:176596984..176596986,+	0	0	0	0.0807089	0	0	0	0	0	0	0	0	0	0	0	0	0	0	0	0	0	0	0	0	0	0	NA
chr1:176597014..176597049,-	0.193121	0.294159	0.195321	20.0158	6.69223	8.29117	6.84403	10.7344	11.6237	6.49244	2.64247	3.75816	1.96646	2.61386	1.0387	5.37633	5.32611	1.87406	1.87673	1.29664	0	2.8741	4.15113	0	0	2.83325	NA
chr1:176658381..176658391,-	1.35184	1.17664	0.585964	1.04922	0.318678	1.93461	0.488859	0.596357	0.140045	2.16415	0.587216	0.62636	1.22904	3.77557	2.07741	2.57129	0.177537	0	0	1.94496	0	2.75435	0	0	0.405	1.1333	NA
chr1:176710013..176710024,-	0.772483	0.294159	1.17193	3.06694	0.956033	0.829117	0.977719	0.596357	0.980316	1.2023	0.587216	0.62636	0.491614	1.16171	0.519352	0.233754	0	1.87406	0.938367	0	0	0.119754	0	0	0	0.188883	NA
chr1:176710173..176710228,-	13.1322	10.2956	15.2351	49.9588	17.846	15.7532	17.3545	16.3998	25.6983	30.779	8.80823	11.5877	7.62002	11.3267	16.6193	7.24636	11.3624	3.74813	9.85285	14.263	15.3073	8.86182	12.4534	6.95182	8.1	9.25528	NA
chr1:176710286..176710322,-	2.12433	2.35327	0.781286	31.7993	12.7471	22.1098	12.4659	16.9962	20.0265	16.3513	4.40412	4.6977	3.68711	4.066	3.11611	1.87003	3.01813	0	2.34592	2.59328	0	4.67042	4.15113	1.39036	0.81	0.944416	NA
chr1:176710320..176710324,+	21.4364	12.0605	16.7976	7.66735	5.7362	7.46206	10.0216	8.94536	13.5844	20.9201	21.4334	24.428	23.8433	17.7161	35.8353	12.3889	7.63409	9.37031	22.0516	91.4132	20.4098	15.4483	31.1335	11.1229	7.695	9.25528	NA
chr1:176710344..176710345,-	0	0	0	1.12992	0.318678	0	0.24443	0.298179	0.350113	0.240461	0	0	0	0	0	0	0.177537	0	0	0	0	0	0	0	0	0	NA
chr1:176715015..176715025,+	1.35184	1.47079	1.56257	4.76183	1.91207	1.65823	1.22215	0	1.19038	0.961843	0.587216	1.5659	0.491614	0.871285	0.519352	0.467507	1.59783	0	0.938367	1.29664	0	0.718526	0	0	0	0.188883	NA
chr1:176715041..176715044,+	0.386241	0.294159	0.781286	1.45276	0	0.829117	0.488859	0.298179	0.560181	0	0.293608	0	0.491614	0.290428	0	0.233754	0.532611	0	0.938367	0.64832	0	0.119754	2.07557	0	2.025	0.188883	NA
chr1:176715052..176715071,+	5.40738	5.88318	6.83625	14.9311	5.7362	2.48735	3.17759	1.78907	3.43111	2.88553	2.05525	4.38452	1.22904	2.90428	4.15481	3.0388	2.48552	0	1.87673	5.83488	5.10245	3.23337	2.07557	5.56145	6.885	5.85538	NA
chr1:176715091..176715104,+	1.15872	1.76495	1.56257	7.66735	1.91207	2.21098	2.19987	1.49089	2.03065	4.08783	1.17443	1.5659	1.96646	0.871285	2.59676	1.40252	1.77537	0	1.40755	1.94496	0	3.11361	4.15113	1.39036	2.43	1.32218	NA
chr1:1769..1773,+	7.33858	5.0007	4.88304	4.68112	1.27471	0.829117	0.733289	0	0.560181	0.480922	0.293608	2.19226	0.983229	1.16171	0.519352	1.63628	1.4203	0	0.469184	3.2416	0	1.19754	0	1.39036	0.405	1.51107	NA
chr1:177061980..177061991,-	24.1401	11.4722	21.876	8.55515	8.28562	12.9895	12.2215	12.5235	27.5189	19.2369	14.974	17.2249	15.4859	15.1023	12.9838	15.4277	53.9712	0	2.34592	0.64832	0	6.10747	2.07557	2.78073	2.43	1.69995	NA
chr1:177104577..177104619,-	15.2565	8.23645	10.5474	100.16	33.7798	40.074	27.1317	35.1851	41.0332	47.3708	18.7909	20.0435	12.0446	16.8448	12.9838	8.41513	12.25	1.87406	1.40755	9.7248	0	22.8731	35.2846	9.73254	5.265	13.0329	NA
chr1:177104624..177104629,-	0.772483	0.294159	0.585964	2.7441	0.956033	1.10549	0.733289	1.78907	1.33043	0.480922	0.293608	1.5659	0.245807	0.290428	1.0387	0.233754	0.887685	0	0	0.64832	0	0.479017	0	0	0.81	0.56665	NA
chr1:177104631..177104656,-	6.5661	4.41238	4.49239	28.3288	10.1977	17.9642	12.9548	16.9962	17.5757	19.9582	17.0293	14.0931	11.5529	7.84157	8.30963	3.97381	8.34424	1.87406	7.50694	7.13152	10.2049	13.7717	10.3778	5.56145	5.265	9.0664	NA
chr1:177105723..177105740,+	15.6428	20.0028	17.9696	17.5138	9.87901	11.3313	9.28833	9.24354	14.8448	12.023	12.6251	7.8295	5.65357	6.099	8.82898	8.18138	8.87685	3.74813	8.4453	13.6147	15.3073	5.5087	8.30226	8.34218	10.53	13.7885	NA
chr1:177105758..177105774,+	4.6349	2.94159	4.88304	13.9626	7.64827	8.56755	7.08846	5.96357	7.28235	6.7329	4.40412	2.81862	1.72065	0.871285	0.519352	0.935015	0.887685	0	1.87673	0.64832	0	1.91607	2.07557	0	0.405	3.02213	NA
chr1:177160912..177160927,+	0	0	0	0	0	0	0	0	0.28009	0	0.293608	0	0	0.290428	0	3.5063	3.19566	5.62219	5.6302	0	0	0.239509	0	0	0	0	NA
chr1:177381554..177381563,+	0	0	0	0.0807089	0	0	0	0	0.0700226	0.240461	1.17443	0.31318	0.491614	0.871285	1.0387	0	0	0	0.469184	1.29664	0	0	0	22.2458	25.92	0	hepatocytes
chr1:177381584..177381596,+	0	0	0	0	0	0	0	0	0.630203	1.44276	2.93608	1.5659	1.47484	2.033	2.07741	0	0.355074	1.87406	6.09939	9.07648	10.2049	0	0	164.063	123.525	0.377767	hepatocytes
chr1:177381687..177381692,+	0	0	0	0	0	0	0	0	0	0	0	0	0	0	0	0	0	1.87406	0	0	0	0	0	9.73254	11.34	0	hepatocytes
chr1:177395391..177395394,+	0.965603	1.17664	2.92982	0.887798	1.27471	0.552745	0.488859	0.298179	0.630203	0.240461	0.587216	0.62636	0	0.290428	1.55806	0.467507	0.355074	5.62219	2.8151	1.29664	0	0.958034	2.07557	1.39036	0	1.32218	NA
chr1:177424962..177425008,+	13.3253	10.0014	16.7976	7.50593	1.91207	6.08019	8.06618	12.2253	19.2562	18.9964	15.8548	16.2854	11.5529	12.4884	17.1386	8.41513	14.203	5.62219	11.7296	13.6147	0	9.58034	6.2267	16.6844	17.82	18.5106	NA
chr1:177425029..177425079,+	4.44177	4.41238	4.88304	28.4095	19.758	23.768	28.5983	31.9051	48.1755	40.8783	26.7183	26.6203	19.6646	18.0066	21.8128	5.14258	7.45655	5.62219	6.09939	13.6147	5.10245	18.9212	22.8312	29.1976	27.54	7.9331	NA
chr1:177560899..177560924,-	0	0	0	0.645671	0.318678	0	1.46658	0.894536	1.47047	0.961843	1.17443	3.44498	2.70388	3.48514	6.23222	6.0776	11.895	1.87406	7.50694	7.13152	0	3.95189	8.30226	0	0.405	0	NA
chr1:177565412..177565426,-	0	0	0	0.0807089	0	0	0	0	0.210068	0.961843	5.87216	3.75816	6.14518	5.22771	4.67417	6.5451	12.9602	0	0	2.59328	0	11.7359	4.15113	0	0	0	NA
chr1:177565821..177565830,-	0	0	0.195321	0	0	0	0	0.298179	0	0.240461	0.880823	1.5659	1.96646	1.45214	1.0387	4.44132	3.90581	3.74813	1.87673	0.64832	0	1.07779	4.15113	0	0	0	NA
chr1:177611887..177611892,+	6.5661	11.7664	5.469	0	0	0	0	0	0	0	0	0	0	0	0	0	1.06522	0	0	0	0	0	0	0	0	1.32218	NA
chr1:177611973..177611978,+	5.79362	6.76566	4.68772	0.0807089	0	0	0	0	0.0700226	0	0	0	0	0	1.0387	3.74006	3.72828	0	0.469184	0	0	0	0	0	0	1.32218	NA
chr1:177611981..177612022,+	48.2802	77.9521	55.276	0.161418	0	0	0	0.298179	0.910293	0.480922	0.293608	0.31318	1.96646	4.35643	9.34833	32.258	61.7829	41.2294	29.0894	11.0214	0	4.79017	4.15113	0	0	12.6552	NA
chr1:177669654..177669657,+	7.72483	13.5313	7.03157	0.0807089	0	0	0	0	0	0	0	0.31318	0.983229	0.290428	0	2.33754	1.24276	0	0	0	0	0.598771	0	0	0	3.96655	NA
chr1:177675254..177675258,-	2.12433	1.17664	2.14854	0.161418	0	0.829117	0	0.596357	0.28009	0	0.587216	0	1.47484	1.45214	0.519352	1.63628	3.3732	0	1.40755	0	0	7.0655	2.07557	0	0	0.188883	NA
chr1:177757108..177757119,-	1.54497	0.882477	3.32047	0	0	0	0	0	0	0	0	0	0	0	0	2.10378	3.55074	0	2.8151	0	0	0	0	0	0	0	NA
chr1:177788662..177788677,-	4.05553	6.17734	4.29707	2.09843	0.637355	1.38186	3.17759	1.78907	3.36108	3.36645	3.52329	4.38452	4.42453	2.033	0.519352	4.90883	9.58699	0	1.40755	0	0	10.8976	8.30226	1.39036	0.81	0.56665	NA
chr1:178241652..178241654,+	0	0	0	0	0	0	0	0	0	0	0	0	0	0	0	0	0	0	0	0	0	0	0	0	0	0	NA
chr1:178268287..178268290,+	0	0	0	0	0	0	0	0	0	0	0	0	0	0	0	0	0	0	0	0	0	0	0	0	0	0	NA
chr1:178412623..178412627,-	5.6005	4.70654	7.03157	0.161418	0	0	0	0	0	0	0.293608	0.31318	0.491614	0.290428	0	1.16877	2.30798	1.87406	1.40755	0	0	2.8741	4.15113	0	0	0	NA
chr1:178412917..178412932,-	1.35184	1.76495	3.12514	0	0	0	0	0	0	0	0	0	0	0.290428	0.519352	1.40252	0.355074	1.87406	1.40755	0	0	3.83214	2.07557	0	0	0	NA
chr1:178436413..178436452,+	57.9362	52.9486	34.3766	20.3386	14.9779	15.4769	30.7981	25.6434	44.5344	58.1915	38.169	36.9553	22.8601	31.6567	21.8128	16.8303	20.9494	16.8666	35.6579	22.6912	30.6147	23.7113	26.9823	75.0796	45.765	56.8539	NA
chr1:178578801..178578806,+	2.70369	2.94159	1.75789	1.29134	0.318678	0.552745	0.488859	2.38543	2.66086	1.44276	2.34886	1.87908	1.22904	1.74257	1.0387	1.87003	2.13044	0	2.34592	0.64832	0	0.958034	0	0	0.405	2.64437	NA
chr1:178578818..178578830,+	9.84915	11.178	8.59415	2.25985	0.637355	1.93461	1.71101	1.19271	5.53178	4.32829	2.64247	2.81862	0.737422	2.61386	1.0387	0.701261	3.55074	0	0.469184	0	0	1.19754	0	2.78073	2.835	13.2218	NA
chr1:178578835..178578870,+	72.4202	89.7185	84.7695	12.4292	8.6043	13.2659	14.6658	19.3816	28.8493	39.1951	28.1863	32.5707	26.793	19.7491	21.8128	15.8952	17.5762	13.1184	37.0655	31.7677	25.5122	17.3644	24.9068	9.73254	6.885	124.096	NA
chr1:178626356..178626361,-	0.965603	0.294159	0.585964	2.34056	1.59339	2.76372	1.46658	1.78907	1.68054	6.49244	3.52329	3.44498	1.96646	2.033	4.67417	1.87003	0.355074	0	0.469184	4.53824	0	2.39509	4.15113	0	0.405	0.944416	NA
chr1:178626368..178626402,-	33.603	30.5925	30.6655	51.4116	26.7689	48.9179	53.7745	46.8141	44.6744	83.6804	81.623	75.1632	70.7925	81.0295	28.045	30.8555	23.4349	14.9925	35.6579	42.7891	35.7171	42.2733	51.8891	70.9085	68.445	34.1879	NA
chr1:178626425..178626428,+	0.579362	0	0	2.66339	2.54942	2.21098	1.71101	1.19271	1.89061	0.721382	1.46804	0.31318	0.245807	0.290428	0.519352	0	0.355074	0	0	0	0	0.598771	2.07557	0	0	0.188883	NA
chr1:178626436..178626472,+	7.53171	2.64743	4.10175	71.3467	42.0655	56.9327	42.5308	34.8869	41.8035	36.55	17.9101	19.7303	15.7317	11.0363	14.5418	7.24636	7.45655	1.87406	2.34592	12.9664	0	31.7349	18.6801	1.39036	0.405	3.77767	NA
chr1:178626486..178626501,+	6.17986	0.588318	2.14854	58.0297	29.9557	34.5466	19.7988	18.7853	23.2475	21.8819	11.1571	14.0931	9.58648	6.97028	11.9451	4.20757	4.97103	3.74813	0.938367	7.13152	0	16.0471	10.3778	1.39036	0	3.77767	NA
chr1:178626661..178626674,-	0.386241	0.294159	0.195321	4.27757	3.50545	4.69833	3.91087	1.78907	4.48144	2.40461	2.93608	1.25272	0.245807	0.580857	0	0.233754	0.355074	0	0	0	0	0.359263	0	0	0	0.188883	NA
chr1:178644662..178644700,-	158.552	152.963	162.507	192.329	140.537	170.245	162.79	166.384	170.015	153.654	145.629	162.854	151.171	132.145	128.28	110.799	109.54	78.7106	132.31	157.542	86.7416	143.945	145.29	123.742	106.515	170.184	NA
chr1:178671312..178671348,+	6.95234	12.6488	15.0398	12.0256	5.41752	9.12029	4.64416	5.96357	7.63246	13.2253	10.2763	13.1536	11.3071	9.87457	17.1386	11.9214	11.7174	28.1109	35.1888	22.6912	20.4098	8.3828	4.15113	25.0265	16.2	30.5991	NA
chr1:178671360..178671376,+	21.6295	29.7101	44.5333	18.4016	5.7362	8.29117	4.64416	9.8399	8.89287	15.149	10.8635	13.1536	10.0781	7.26071	10.387	4.44132	6.21379	1.87406	13.1371	7.77984	10.2049	2.75435	0	27.8073	16.605	10.1997	NA
chr1:178738949..178738962,+	1.54497	1.17664	0.781286	6.13388	1.27471	3.59284	1.95544	3.57814	3.7112	1.2023	1.76165	1.25272	0	1.74257	0.519352	0.233754	1.4203	0	0.469184	0	0	1.07779	2.07557	2.78073	0	2.2666	NA
chr1:178738978..178739014,+	6.95234	7.05981	7.42222	65.6163	21.0327	29.5719	14.4214	11.3308	21.4269	15.8704	7.92741	12.214	4.67034	6.38942	6.23222	2.10378	4.26089	0	3.28428	4.53824	0	5.38894	4.15113	6.95182	1.62	6.98868	NA
chr1:178739022..178739029,+	0.579362	1.17664	0.195321	2.58269	1.91207	2.48735	0.24443	1.19271	1.19038	1.2023	0.880823	2.50544	0.245807	0.580857	0.519352	0	0.177537	0	0	0.64832	0	0.718526	0	0	0.405	0.377767	NA
chr1:178739117..178739154,+	7.72483	6.4715	8.78947	103.953	39.8347	46.7069	33.9757	32.7997	46.1449	27.4125	27.8927	23.4885	12.0446	14.8118	21.8128	9.5839	11.3624	22.4888	19.7057	14.9114	5.10245	29.22	37.3602	6.95182	5.265	9.82193	NA
chr1:178740982..178740993,-	0	0	0	5.00395	2.23074	1.65823	0.733289	0	0.210068	0	0	0	0	0	0	0	0	0	0	0	0	0	0	0	0	0	NA
chr1:178782696..178782701,+	0.193121	0.588318	0.195321	0	0	0	0.24443	0	0	0	0	0	0	0	0.519352	3.74006	9.76453	0	0	0	0	0	0	0	0	0	NA
chr1:178817118..178817130,+	1.54497	2.35327	3.12514	3.22836	0.318678	3.0401	1.95544	2.38543	4.69151	4.08783	4.40412	3.44498	1.96646	2.90428	3.11611	3.0388	2.30798	5.62219	4.22265	5.83488	5.10245	3.35312	8.30226	1.39036	2.43	0.944416	NA
chr1:178817145..178817167,+	5.21426	9.70725	13.6725	5.64962	4.78017	3.59284	5.37745	8.349	8.96289	5.29014	7.34019	6.2636	1.96646	3.48514	9.34833	5.37633	7.27901	1.87406	4.69184	9.07648	0	9.7001	8.30226	2.78073	6.48	8.12198	NA
chr1:178876664..178876703,-	2.12433	2.35327	1.56257	6.53742	2.8681	4.42196	5.13302	4.1745	9.87318	6.49244	4.99133	4.6977	6.39099	5.22771	3.11611	5.37633	5.68118	3.74813	4.69184	1.29664	0	6.22722	6.2267	2.78073	2.835	2.83325	NA
chr1:178876707..178876718,-	1.73809	0.882477	0.585964	1.93701	0.637355	0.276372	1.22215	1.49089	2.52081	1.44276	1.46804	3.44498	3.19549	2.033	3.11611	2.80504	3.72828	1.87406	1.87673	3.2416	0	2.75435	0	0	1.215	2.45548	NA
chr1:178876720..178876752,-	5.98674	7.05981	6.25029	2.90552	1.27471	0.276372	2.68873	1.78907	4.55147	3.36645	4.69772	5.32406	5.40776	7.84157	7.79028	6.5451	5.85872	9.37031	3.75347	4.53824	5.10245	5.02968	2.07557	6.95182	4.86	5.85538	NA
chr1:178880672..178880681,+	0.193121	0	0	0.0807089	0	0	0	0	0	0.240461	0	0.62636	0.245807	0	0	0	0	0	0	0	0	0.239509	0	20.8554	31.59	0	hepatocytes
chr1:178883402..178883418,+	3.28305	5.29486	5.66432	0.807089	0	0.276372	0.488859	0.894536	0.980316	0.721382	0.880823	0.62636	1.72065	1.45214	1.0387	3.27255	2.66305	0	4.69184	2.59328	10.2049	0.958034	2.07557	12.5133	12.555	10.1997	NA
chr1:178883432..178883445,+	1.54497	4.70654	5.85964	2.66339	0.318678	0.276372	0.488859	0.894536	0.630203	0.480922	0.293608	0.31318	0.983229	0.580857	0.519352	1.16877	4.08335	0	15.4831	0	0	0.359263	0	111.229	88.29	6.98868	late
chr1:178963468..178963480,+	0	0	0	12.9941	7.96694	13.2659	24.1985	26.8361	28.1491	26.4507	18.7909	22.2358	17.9439	13.6501	11.9451	0.935015	1.95291	0	3.75347	8.42816	5.10245	0.239509	0	0	0	0	NA
chr1:178963497..178963515,+	0	0	0	37.9332	27.725	44.496	85.306	91.8391	87.8783	70.9359	40.5179	60.4438	43.0163	53.7293	17.1386	1.16877	4.26089	5.62219	3.75347	16.208	0	0	0	0	0	0	NA
chr1:178989092..178989110,+	0	0.882477	0.195321	107.262	39.516	33.4411	72.3512	105.257	103.773	88.2491	114.801	116.816	61.9434	81.6104	94.0027	1.16877	1.4203	11.2444	15.0139	62.2387	20.4098	0.119754	0	5.56145	5.67	0	NA
chr1:178992168..178992171,+	0	0.294159	0	5.16537	1.91207	2.48735	3.42202	2.68361	3.78122	7.93521	11.1571	10.9613	7.62002	9.58414	1.55806	0.701261	0	0	0.469184	0	0	0	0	0	0	0	NA
chr1:179049198..179049202,-	0.193121	0	0.390643	0	0.637355	0	0.488859	0.596357	0.140045	0.240461	0	0.31318	2.45807	1.45214	2.59676	1.16877	1.4203	0	0	0	0	1.79631	2.07557	0	0	0.377767	NA
chr1:179142522..179142528,-	0.193121	0	0.390643	4.11615	5.7362	4.9747	1.22215	0.894536	1.89061	1.2023	0.293608	0.31318	0.245807	0	1.55806	0.467507	0.177537	0	0	0	0	0.359263	0	0	0	0	NA
chr1:179142538..179142599,-	26.8438	25.0035	34.9625	436.797	173.679	194.013	132.481	101.381	130.802	104.36	48.4453	45.4111	29.2511	33.1088	37.9127	29.9205	38.7031	22.4888	34.7196	40.8442	20.4098	54.0092	56.0403	18.0747	14.985	36.4545	NA
chr1:179142613..179142620,-	1.54497	1.47079	1.95321	16.3032	4.78017	6.35657	5.37745	3.87632	5.18167	4.32829	1.17443	1.5659	1.47484	3.19471	2.59676	0.701261	2.30798	0	0.938367	0.64832	0	1.3173	0	2.78073	2.43	3.3999	NA
chr1:179143781..179143794,+	0.386241	0.294159	0.195321	0.645671	0	0.276372	0	0.298179	1.68054	2.64507	0.587216	1.25272	0.737422	0.871285	0	0	0	0	0	0	0	0.119754	0	0	0	0.377767	NA
chr1:179180437..179180457,+	0.193121	0.294159	0.585964	9.60436	3.82413	8.0148	5.37745	5.36722	5.32172	5.5306	4.11051	0.93954	1.47484	4.35643	3.63546	0.701261	4.43842	0	0.938367	2.59328	0	2.51484	6.2267	1.39036	0.81	1.51107	NA
chr1:179180473..179180488,+	0.386241	1.17664	0.585964	5.64962	3.18678	4.9747	5.37745	2.98179	2.87093	3.12599	4.40412	1.25272	1.47484	3.77557	2.07741	0.467507	3.01813	0	0.469184	0.64832	0	2.03582	4.15113	0	0.405	0.944416	NA
chr1:179180999..179181010,+	2.12433	0.882477	0.976607	7.50593	3.82413	6.35657	9.0439	5.6654	5.60181	11.7826	9.10184	4.38452	4.91614	7.55114	4.67417	4.67507	2.84059	5.62219	3.75347	10.3731	0	7.54452	8.30226	0	0.81	2.07772	NA
chr1:179181023..179181044,+	17.7671	15.2963	11.7193	124.372	50.6698	66.6058	57.1965	51.8831	77.3049	70.6955	37.8754	30.3785	29.2511	33.6897	35.3159	37.4006	26.8081	11.2444	18.7673	10.3731	5.10245	50.177	29.0579	19.4651	7.695	18.6994	NA
chr1:179259949..179259980,-	2.89681	3.82407	3.32047	2.09843	3.18678	3.86921	1.22215	1.78907	0.840271	1.44276	5.28494	5.32406	2.45807	0.871285	2.07741	4.20757	1.4203	0	0	1.94496	0	10.7779	2.07557	1.39036	6.075	2.45548	NA
chr1:179263769..179263790,-	0.965603	2.94159	1.36725	17.1103	7.32959	8.0148	4.64416	3.87632	8.82284	7.21382	4.11051	2.81862	3.68711	2.61386	2.07741	2.57129	5.14857	1.87406	1.40755	0	0	3.95189	2.07557	4.17109	4.455	2.07772	NA
chr1:179307822..179307825,-	2.89681	2.94159	1.36725	1.45276	0.637355	0	0	0	0.140045	0	0	0	0.245807	0.580857	0	0.467507	1.06522	0	0.938367	0.64832	0	0.119754	0	2.78073	2.025	0.377767	NA
chr1:179307926..179307947,-	19.6983	31.7692	28.1263	12.4292	1.27471	2.21098	1.95544	1.78907	1.61052	2.64507	2.64247	4.07134	3.93291	6.67985	2.59676	9.35015	12.4276	0	7.97612	3.88992	5.10245	4.1914	4.15113	9.73254	12.555	43.632	NA
chr1:179307953..179307979,-	8.88355	17.9437	21.876	11.4607	1.91207	3.0401	2.68873	0.894536	2.59084	3.12599	3.8169	5.01088	7.12841	6.67985	9.34833	10.9864	12.25	9.37031	13.1371	16.208	0	3.83214	0	16.6844	12.96	22.4771	NA
chr1:179309882..179309889,+	0.193121	0	0.195321	2.09843	0.318678	1.10549	0.977719	1.19271	1.33043	0.721382	0.587216	0	0	0.580857	0	0.233754	0.177537	1.87406	0.469184	0.64832	0	0.718526	0	0	0	0.188883	NA
chr1:179309890..179309908,+	1.73809	0.294159	1.36725	7.99018	2.54942	3.0401	4.1553	4.47268	5.46176	2.16415	1.46804	1.25272	1.96646	1.16171	3.11611	0.935015	2.48552	1.87406	0.469184	0.64832	0	3.47287	10.3778	0	0	0.377767	NA
chr1:179612468..179612532,-	23.1745	26.1801	28.9076	70.2975	24.2195	35.9284	25.4207	27.4324	41.7335	50.9777	34.9393	37.2684	29.0052	26.429	20.2547	13.0902	17.9312	3.74813	13.6063	14.263	10.2049	10.2989	4.15113	312.832	249.885	23.6104	NA
chr1:179631190..179631228,+	99.264	114.722	124.615	76.1085	33.7798	48.6416	41.7975	52.7776	67.7118	80.5544	53.7302	62.3228	72.7589	80.1582	109.064	86.9564	88.946	133.058	134.186	154.3	35.7171	78.3193	97.5516	123.742	115.02	80.842	NA
chr1:179631237..179631246,+	9.84915	10.8839	8.98479	4.84253	2.54942	2.76372	0.733289	2.68361	2.10068	2.40461	2.34886	3.75816	3.68711	4.93728	7.79028	3.27255	7.81163	9.37031	11.7296	3.2416	0	4.90993	4.15113	16.6844	9.315	3.3999	NA
chr1:179652544..179652547,+	2.51057	2.35327	1.17193	0.0807089	0.318678	0.276372	0.24443	0	0.0700226	0.240461	1.17443	0.31318	0.491614	0.871285	0	1.16877	0	0	0.469184	0	0	4.55066	0	1.39036	1.215	0.755533	NA
chr1:179655776..179655803,+	1.15872	2.64743	2.53918	0.403545	0.318678	0.829117	0.24443	0.298179	0.28009	0.240461	0.880823	1.5659	1.72065	0.871285	1.0387	6.0776	0.887685	1.87406	0	1.29664	5.10245	8.02354	2.07557	0	1.62	1.88883	NA
chr1:179658090..179658097,+	2.12433	4.11823	1.56257	0.887798	0.637355	0.829117	0.733289	0.298179	0.210068	1.2023	1.17443	2.81862	1.47484	2.61386	0.519352	4.44132	1.59783	0	0	1.29664	0	4.90993	4.15113	2.78073	1.215	0.944416	NA
chr1:179716437..179716439,+	0	0	0	0	0	0	0	0	0	0	0	0	0	0	1.0387	0	0	0	3.75347	0	0	0	0	0	0	0	NA
chr1:179821199..179821200,+	0	0	0	0.161418	0	0	0	0	0.28009	1.44276	2.64247	2.19226	1.72065	0.290428	3.11611	0	0	0	0	7.77984	0	0	0	0	0	0	NA
chr1:179922131..179922142,-	0.579362	2.35327	0	5.24608	3.18678	4.42196	1.46658	1.78907	0.560181	0.961843	0.587216	0.62636	1.22904	2.32343	1.0387	4.44132	4.7935	3.74813	5.6302	1.29664	0	0.119754	0	0	0	1.51107	NA
chr1:180061742..180061743,+	0	0	0	0	0	0	0	0	0	0	0	0	0	0	0	0	0	0	0	0	0	0	0	0	0	0	NA
chr1:180182009..180182067,-	17.3809	12.6488	13.0865	114.042	45.5709	67.1585	47.1749	51.8831	75.5544	54.8251	25.2503	20.6699	16.4691	17.4257	12.4644	11.6877	18.6414	9.37031	6.09939	14.263	5.10245	21.7953	18.6801	12.5133	9.71999	12.2774	NA
chr1:180184619..180184628,+	0	0	0	3.38977	0.956033	0.552745	0.488859	0.298179	0.28009	0.480922	0.293608	0	0	0	0	0	0	0	0	0	0	0	0	0	0	0	NA
chr1:180214257..180214266,+	0	0	0	0	0.318678	0	0	0.298179	0	0	0	0	0	0	0	0.701261	0.887685	1.87406	2.34592	0	0	0	0	40.3205	17.415	0	hepatocytes
chr1:180248553..180248565,+	16.029	20.8853	16.993	0.161418	0	0.552745	0.488859	0	0.840271	0.961843	0.880823	0.31318	0.983229	0.871285	3.63546	0.935015	1.59783	0	2.34592	1.29664	0	0.598771	0	1.39036	0.81	10.0108	NA
chr1:180248580..180248620,+	59.4812	54.4194	60.5497	0.484253	0.318678	1.65823	0.977719	0.596357	2.73088	4.32829	2.34886	2.19226	1.72065	2.61386	3.63546	0.935015	3.3732	0	2.34592	1.94496	5.10245	1.55681	4.15113	0	1.215	32.6768	NA
chr1:180248637..180248658,+	34.5686	26.7685	36.9158	1.53347	0.318678	0.552745	0.24443	0.298179	2.03065	0.721382	0.587216	1.87908	1.22904	1.45214	1.55806	0.233754	1.24276	0	2.8151	1.29664	0	0.359263	0	0	1.62	16.6217	Aortic
chr1:180345576..180345588,-	3.08993	3.23575	3.32047	4.60041	2.54942	2.48735	4.39973	3.87632	5.46176	5.77106	4.99133	7.20314	4.67034	4.93728	5.19352	4.90883	5.85872	0	4.69184	0.64832	0	3.83214	4.15113	4.17109	4.455	3.77767	NA
chr1:180345623..180345648,+	4.44177	2.35327	1.95321	28.3288	8.92298	8.29117	3.91087	5.6654	7.63246	6.49244	1.46804	2.81862	3.4413	4.35643	5.19352	1.40252	8.69931	0	2.34592	1.29664	5.10245	2.63459	2.07557	9.73254	4.86	4.72208	NA
chr1:180377386..180377410,-	0	0	0	0	0	0	0	0	0.140045	0.240461	2.34886	2.81862	6.8826	9.87457	8.82898	0	0.177537	0	0	14.263	0	0	0	0	0	0	NA
chr1:180380505..180380550,-	89.0286	57.0668	86.5274	72.7994	46.5269	68.264	74.0622	104.661	145.787	101.474	102.176	147.508	199.35	214.627	154.247	65.2173	132.087	44.9775	56.7712	307.952	142.868	75.2057	22.8312	1083.09	949.32	54.965	NA
chr1:180383532..180383562,+	0	0	0	0	0	0	0	0	0	0	0	0	0	0	0	0	0	0	0.469184	0	0	0	0	13.9036	17.01	0	hepatocytes
chr1:180401700..180401703,+	0	0	0	0	0	0	0	0	0	0	0	0	0	0	0.519352	0	0	0	0	0	0	0	0	0	0	0	NA
chr1:180414496..180414502,+	0	0	0	0	0	0	0.24443	0.298179	0.0700226	1.92369	2.05525	3.1318	8.60325	6.67985	5.71287	0	0	1.87406	1.40755	13.6147	5.10245	0	0	2.78073	1.215	0	extraembryonic
chr1:180415354..180415379,-	4.24865	5.88318	4.29707	5.56892	1.27471	2.48735	3.17759	2.08725	6.65214	7.21382	3.8169	5.32406	4.17872	5.51814	6.23222	3.27255	10.4747	3.74813	2.8151	9.7248	0	4.31115	4.15113	16.6844	11.745	7.36645	NA
chr1:180415393..180415435,-	12.3597	14.7079	18.3602	22.2757	6.37355	6.08019	8.55504	9.24354	22.1271	14.6681	10.8635	8.76904	12.782	10.165	11.9451	8.41513	17.5762	7.49625	7.03775	3.88992	5.10245	10.4186	12.4534	34.7591	21.06	15.8662	NA
chr1:180455938..180455965,+	5.21426	1.17664	2.53918	16.4646	13.7031	14.9241	11.7326	14.3126	13.5144	19.7178	8.51463	12.5272	12.2904	11.3267	8.30963	2.57129	4.97103	0	1.87673	0.64832	5.10245	4.43091	2.07557	0	2.43	1.69995	NA
chr1:180517017..180517038,+	0	0	0	6.86026	2.8681	2.48735	0	0.298179	0.28009	0.240461	0.880823	0	1.72065	0.580857	1.55806	1.63628	0.887685	88.0809	167.029	1.29664	0	0	0	0	0	0	NA
chr1:180517039..180517046,+	0	0	0	0.242127	0.956033	0.276372	0.24443	0	0	0	0	0	0.245807	0	0	0	0.177537	7.49625	20.6441	0	0	0	0	0	0	0	late
chr1:180517055..180517062,+	0	0	0	0.564962	0.637355	0.276372	0	0	0	0	0	0	0	0	0	1.40252	0.887685	39.3553	105.097	0	0	0	0	0	0	0	NA
chr1:180576055..180576070,-	0.965603	1.17664	0.390643	2.34056	0.956033	0	0.488859	0.894536	2.10068	0.961843	2.05525	0.62636	2.70388	1.74257	3.11611	6.77886	2.30798	14.9925	26.2743	0.64832	0	4.1914	2.07557	0	0	0	NA
chr1:180587843..180587870,+	2.70369	1.76495	5.66432	7.2638	3.18678	6.08019	3.17759	4.77086	6.37205	4.32829	4.69772	3.75816	3.19549	2.32343	4.15481	4.90883	3.01813	1.87406	5.6302	3.88992	5.10245	3.83214	10.3778	11.1229	8.91	3.77767	NA
chr1:180655516..180655551,+	8.88355	7.94229	10.5474	60.2089	29.9557	34.2702	26.154	28.327	31.3701	37.5119	18.2037	25.6808	16.4691	15.6831	18.6967	16.8303	19.5291	20.6147	22.5208	19.4496	10.2049	21.3163	22.8312	25.0265	10.125	12.0885	NA
chr1:180739206..180739214,+	0	0	0	0	0	0	0	0	0	0	0	0	0	0	0	0	0	0	0	0	0	0	0	0	0	0	NA
chr1:180825189..180825200,+	0.193121	0.294159	0	0.403545	0	0	0.488859	0	0.210068	0.480922	4.69772	8.14268	12.782	14.8118	17.658	1.87003	12.0725	13.1184	19.2365	29.8227	20.4098	1.91607	4.15113	1.39036	0	0.188883	extraembryonic
chr1:18086770..18086798,+	0	0	0	4.43899	2.8681	1.10549	3.42202	0.596357	0.560181	0.480922	0.293608	0.31318	0.491614	0.871285	1.55806	0	0	0	0	0.64832	0	0	0	0	0	0	NA
chr1:180955364..180955370,+	0	0	0.195321	0.0807089	0	0	0	0	0.140045	0	0.880823	1.25272	3.19549	0	1.55806	0.935015	0	0	5.16102	2.59328	20.4098	3.83214	2.07557	2.78073	0.405	0	extraembryonic
chr1:181132260..181132272,+	0.193121	1.47079	1.75789	3.06694	0.956033	1.10549	0.977719	2.38543	2.31075	0.961843	1.17443	1.5659	0.491614	0.580857	0.519352	6.31135	3.55074	3.74813	7.03775	3.2416	0	0.958034	2.07557	1.39036	0.81	0.56665	NA
chr1:181151843..181151873,+	4.6349	7.64813	8.39882	14.7697	3.50545	5.80382	6.11074	5.06904	6.09196	6.25198	4.99133	6.57678	4.42453	5.22771	8.30963	13.5577	7.27901	5.62219	7.97612	3.88992	5.10245	10.4186	10.3778	4.17109	3.645	5.85538	NA
chr1:181212433..181212470,+	14.6772	9.41309	8.00818	9.76578	8.92298	8.84392	7.82175	5.6654	3.36108	5.5306	11.4507	13.1536	20.6478	20.9108	8.82898	15.4277	2.66305	9.37031	7.03775	2.59328	0	16.1668	4.15113	6.95182	16.2	11.1441	NA
chr1:181212481..181212553,+	42.1003	30.2984	29.4935	11.1378	20.0767	26.5318	24.9318	14.9089	6.93224	12.2635	31.1224	25.0544	58.0105	74.0592	78.9415	42.5432	9.23192	121.814	80.2304	134.202	56.1269	36.4053	41.5113	30.588	32.4	35.3212	NA
chr1:181414924..181414938,-	0	0	0	0.0807089	0.318678	0	0	0	0	0	0	0	0.245807	0.290428	0	13.324	11.895	18.7406	28.151	0	0	0	0	0	0	3.77767	NA
chr1:181584873..181584891,+	0	0.588318	0.585964	3.55119	0.318678	0.276372	0.24443	0	0.0700226	0	0	0	0	0	0	0	0	0	0	0	0	0	0	0	0	0	NA
chr1:181945769..181945796,+	4.24865	4.11823	5.07836	1.37205	0.318678	0.829117	0	0	0.770248	0.240461	0	0.93954	0.983229	1.74257	3.63546	4.67507	22.1921	5.62219	5.6302	3.88992	0	0	0	0	0	0.755533	middle_late
chr1:181945814..181945824,+	3.86241	5.29486	3.71111	0.0807089	0	0.276372	0	0	0.28009	0.480922	0.587216	0.93954	0.491614	0.290428	1.55806	2.57129	9.58699	1.87406	3.75347	2.59328	5.10245	0.119754	0	0	0	0.56665	NA
chr1:181945927..181945940,+	9.07667	12.0605	6.44561	0.242127	0.318678	0.276372	0.488859	0.894536	0.910293	1.68323	0.587216	0.62636	1.22904	1.74257	2.59676	4.20757	8.87685	7.49625	5.6302	3.2416	5.10245	0.479017	0	0	0	0.188883	NA
chr1:181945951..181945965,+	10.2354	17.0612	5.66432	0.807089	0.318678	1.10549	0.488859	0	1.05034	0.721382	0.587216	1.87908	1.47484	0.580857	4.67417	7.24636	14.0254	13.1184	7.97612	4.53824	0	0.479017	2.07557	0	0	0.755533	NA
chr1:181977787..181977789,+	0	0.588318	0.195321	0	0.318678	0	0	0	0.0700226	0	0	0	0.245807	0.580857	0	1.40252	2.66305	0	0.938367	0.64832	0	0.119754	0	0	0	0	NA
chr1:182031862..182031863,+	0	0	0	0	0	0	0	0	0	0	0	0	0	0	0	0.233754	2.13044	0	0	0	0	0	0	0	0	0	NA
chr1:182084487..182084492,+	7.14546	3.52991	3.51579	0.0807089	0.318678	0	0	0.298179	0	0.480922	0.587216	0.31318	0.491614	0.580857	0	3.27255	5.68118	0	0.469184	0	0	0	0	0	0	0.377767	NA
chr1:18223361..18223368,+	0	0	0	9.76578	0.956033	0.276372	0	0	0.140045	0.480922	0	0	0	0.871285	0	0	0	0	0	0.64832	0	0	0	0	0	0	NA
chr1:182383078..182383086,-	0	0	0	4.60041	0.318678	0	0	0	0.0700226	0.240461	0	0	0	0	0	0	0	0	0	0	0	0	0	0	0	0	NA
chr1:182386407..182386455,-	3.28305	4.70654	5.27368	10.25	3.18678	2.76372	3.66644	2.38543	5.18167	1.92369	2.64247	3.1318	3.4413	4.35643	6.75157	11.4539	7.98916	1.87406	12.668	3.2416	5.10245	8.26305	12.4534	2.78073	0.81	3.21102	NA
chr1:182386544..182386604,+	45.9627	41.1823	41.0175	75.7857	33.7798	50.8525	45.7083	45.025	63.1604	84.8827	42.2795	51.0484	39.8208	30.7854	30.6417	25.7129	26.9856	14.9925	25.8051	27.2294	25.5122	32.4534	41.5113	47.2724	30.375	42.4987	NA
chr1:182386620..182386625,+	1.35184	1.17664	0.976607	3.14765	1.27471	1.65823	0.733289	0.596357	1.40045	2.40461	0.587216	0	0.491614	0.580857	1.0387	0	0.177537	0	0	0	0	1.3173	0	0	0	0.377767	NA
chr1:182444412..182444415,+	0.386241	0.882477	0	0	0	0	0	0	0	0	0	0	0	0	0	0.467507	2.30798	14.9925	56.302	0.64832	15.3073	0	0	0	0	0	NA
chr1:182518086..182518097,+	0.386241	0.294159	0.195321	0	0	0	0	0	0	0.240461	0	0	0	0	0	1.87003	3.55074	3.74813	3.75347	0	0	0.119754	0	0	0	0.377767	NA
chr1:182581289..182581306,+	1.93121	1.76495	2.14854	0	0	0.276372	0	0	0	0	0	0	0	0	0	0	0	9.37031	19.2365	0.64832	0	0	0	0	0	1239.64	NA
chr1:182611313..182611376,+	39.5897	41.4764	50.3929	74.0908	49.0764	58.0382	49.1304	65.8975	91.7296	96.1843	101.882	164.42	207.953	180.356	169.828	83.2163	122.678	61.8441	131.841	206.814	30.6147	45.6264	39.4357	910.688	863.055	644.281	NA
chr1:182611377..182611380,+	0.193121	0.294159	0.195321	0.72638	0	0.829117	0.977719	0.596357	1.12036	0.721382	1.17443	0.93954	1.47484	1.16171	0	1.87003	1.24276	0	0	1.94496	0	0.598771	2.07557	6.95182	11.34	9.0664	NA
chr1:182611399..182611402,+	0	0	0	2.17914	1.27471	1.10549	0.488859	0	0.420135	0.721382	1.76165	0.62636	3.4413	1.16171	0.519352	0.233754	1.06522	1.87406	1.40755	1.29664	0	0.598771	0	4.17109	4.05	3.96655	NA
chr1:182626679..182626681,+	0	0.294159	0	0.322836	0.318678	1.38186	0.488859	0.298179	0.28009	0.480922	0.587216	0.93954	3.4413	0.290428	0.519352	0.467507	0.532611	0	1.40755	2.59328	0	0.119754	0	33.3687	2.835	2.83325	NA
chr1:182626983..182626985,+	0.193121	0.294159	0	0	0.318678	0	0.24443	0	0.0700226	0.240461	1.17443	0.62636	0.245807	0.580857	0	0.467507	0.355074	0	0	0	0	0.239509	0	2.78073	0.405	3.21102	NA
chr1:182627444..182627449,+	0.193121	0.294159	0.976607	0.403545	0.637355	1.10549	1.22215	1.78907	0.490158	0	1.46804	2.50544	11.0613	0.871285	4.67417	4.44132	4.43842	0	1.87673	4.53824	0	0.239509	2.07557	18.0747	3.645	3.58878	NA
chr1:182644328..182644337,-	0.772483	0	0.195321	0.807089	0.318678	1.38186	0.977719	1.49089	0.910293	0.721382	8.51463	5.32406	2.70388	6.38942	5.19352	0.701261	1.24276	3.74813	4.69184	2.59328	25.5122	0.718526	4.15113	15.294	9.315	22.2882	NA
chr1:182644355..182644371,-	0.579362	0.294159	0.195321	1.29134	0	1.10549	1.46658	2.38543	3.36108	5.5306	7.34019	5.32406	6.8826	5.51814	9.34833	2.33754	1.95291	9.37031	6.56857	16.208	25.5122	1.43705	2.07557	18.0747	7.29	7.55533	NA
chr1:182644422..182644443,-	10.8148	10.8839	11.3286	9.9272	3.82413	8.29117	6.84403	6.55993	10.5734	7.69475	4.69772	6.57678	7.62002	7.55114	6.23222	3.97381	8.69931	0	6.56857	5.83488	5.10245	4.1914	4.15113	13.9036	17.415	12.0885	NA
chr1:182683713..182683731,-	0.193121	0.882477	0.390643	0.645671	0.318678	1.65823	0.977719	0.298179	0.28009	0.480922	0.880823	0.93954	0.737422	2.033	2.07741	1.40252	0.532611	1.87406	0	0.64832	0	4.1914	6.2267	0	0	0.188883	NA
chr1:182704223..182704225,-	0.965603	0	0	1.12992	0.318678	1.65823	1.46658	0.596357	0.420135	0.480922	2.34886	1.25272	2.21226	4.066	1.55806	2.10378	0.355074	0	0.938367	0	0	3.47287	2.07557	0	0.405	0.377767	NA
chr1:182765208..182765267,-	49.2458	61.1851	65.2374	140.837	79.3507	104.192	89.9501	93.0318	118.828	100.513	72.8147	72.3446	70.7925	74.6401	73.7479	68.0223	95.1598	11.2444	32.8428	46.0307	15.3073	138.675	114.156	9.73254	12.15	21.1549	NA
chr1:183451778..183451800,-	9.84915	7.94229	11.3286	3.38977	1.59339	2.21098	1.71101	2.98179	3.78122	3.12599	2.93608	4.6977	3.68711	5.51814	8.30963	4.67507	9.76453	13.1184	5.6302	5.83488	0	6.46673	8.30226	9.73254	4.455	10.7663	NA
chr1:183451804..183451817,-	2.31745	4.11823	3.12514	1.7756	0	0.276372	0.977719	0.596357	1.82059	1.68323	0.880823	1.25272	0.983229	2.32343	0.519352	1.16877	2.13044	0	0.938367	2.59328	0	2.51484	4.15113	4.17109	2.43	2.83325	NA
chr1:183537069..183537072,+	0	0	0	0	0	0	0	0	0	0.240461	0	0	0	0	0	0	0	0	0	0	0	0	0	0	0	0	NA
chr1:183829072..183829091,+	0	0	0	30.4273	12.7471	10.2258	11.9771	1.78907	2.45079	1.92369	0.880823	0.93954	1.72065	2.033	0.519352	0	0	0	0	0	0	0	0	0	0	0	early
chr1:1841480..1841494,-	4.6349	6.76566	3.51579	3.79332	1.91207	1.93461	2.68873	2.68361	6.37205	1.68323	4.99133	1.5659	2.45807	1.16171	2.07741	3.0388	6.03626	0	2.8151	4.53824	0	3.47287	0	6.95182	5.67	3.58878	NA
chr1:184148722..184148723,+	0	0	0.195321	0.0807089	0.956033	1.10549	0.488859	0.894536	0.0700226	0.480922	2.34886	2.81862	1.47484	1.74257	1.55806	0.701261	0.177537	1.87406	5.16102	5.83488	0	0.958034	4.15113	1.39036	1.215	0	NA
chr1:184239685..184239695,+	0	0	0.195321	0	0	0	0	0	0	0	0	0	0.491614	0.290428	1.0387	0	0	0	0	0	0	0	0	0	0	0.188883	NA
chr1:184458110..184458112,+	0	0	0	0	0	0	0	0	0	0	0	0	0	0	0	0	0	5.62219	0.469184	0	0	0	0	0	0	0	NA
chr1:184745599..184745609,+	0	0	0	0	0	0	0	0	0	0	0	0	0	0	0	0.233754	0	1.87406	0.469184	0	0	0	0	0	0	0	NA
chr1:184977113..184977123,+	0.386241	0	0.195321	0.161418	0.318678	0	0.977719	0.894536	0.980316	0.961843	1.76165	2.19226	3.4413	2.61386	8.82898	1.16877	1.77537	1.87406	1.40755	12.9664	0	2.03582	8.30226	0	0	0.377767	NA
chr1:184996349..184996366,+	1.93121	5.29486	4.49239	0.968507	0.318678	1.10549	0.977719	2.98179	0.980316	2.40461	0.293608	1.25272	3.19549	3.19471	5.71287	1.40252	3.3732	3.74813	3.75347	3.88992	15.3073	1.91607	6.2267	0	0	0.944416	NA
chr1:184997548..184997574,+	8.11107	11.178	11.7193	4.43899	2.23074	5.25108	3.42202	3.27997	6.72217	4.32829	7.04659	6.57678	7.12841	4.64685	6.23222	1.40252	2.66305	5.62219	1.40755	12.9664	0	5.86796	6.2267	0	0.405	5.28873	NA
chr1:185006067..185006088,+	0.965603	0.882477	0.781286	0.161418	0	0.276372	0.488859	0	0	0.480922	0.880823	2.81862	1.72065	1.74257	1.0387	1.87003	0.887685	0	0.469184	0.64832	0	2.99386	4.15113	0	0	0.188883	NA
chr1:185015416..185015420,+	2.70369	1.47079	0.390643	0.564962	0.956033	0	0.24443	1.49089	0.28009	1.68323	2.64247	3.1318	1.96646	5.51814	2.59676	3.27255	3.3732	1.87406	5.16102	5.18656	0	4.67042	6.2267	0	0.405	3.02213	NA
chr1:185027168..185027191,+	14.0978	14.7079	11.524	1.12992	7.32959	6.08019	7.33289	4.77086	1.40045	4.08783	4.99133	5.01088	6.14518	4.93728	10.387	2.10378	7.98916	5.62219	7.03775	12.3181	5.10245	3.23337	10.3778	20.8554	17.415	10.7663	NA
chr1:185090430..185090440,+	0.772483	0.882477	1.56257	0.72638	1.27471	0.829117	1.46658	0.894536	0.560181	0.961843	4.11051	5.63724	6.14518	4.64685	4.67417	3.74006	2.66305	7.49625	1.87673	3.2416	5.10245	7.18526	6.2267	0	0	1.1333	NA
chr1:185100919..185100920,-	0	0	0.195321	0	0	0	0	0	0	0	0.587216	1.25272	6.39099	8.42242	12.9838	0	0	0	0	5.83488	0	0.119754	2.07557	0	0	0	middle_late
chr1:185109798..185109799,+	0	0	0	0	0	0	0	0	0	0	0	0	0	0	0	0	0	0	0	0	0	0	0	0	0	0	NA
chr1:185226246..185226285,+	16.8015	18.8262	17.9696	5.08466	3.18678	3.59284	4.64416	5.36722	12.324	13.4658	3.52329	9.70858	7.37422	8.132	8.82898	6.31135	11.7174	3.74813	12.668	5.83488	0	6.10747	6.2267	4.17109	9.315	38.3433	NA
chr1:185251943..185251957,+	3.47617	1.76495	1.56257	0	0	0	0	0	0	0	0	0	0	0	0	0.233754	0	0	0.469184	0	0	0	0	0	0	10.1997	Mesenchymal
chr1:185252939..185252950,+	9.07667	4.41238	9.9614	0	0	0	0	0	0	0	0	0	0	0	0	0	0	0	0	0	0	0	0	0	0	0.188883	NA
chr1:185253069..185253083,+	18.9258	23.5327	41.7988	0	0	0	0	0	0	0	0	0	0	0	0	0	0.355074	1.87406	1.40755	0	0	0	0	0	0	0.944416	Aortic
chr1:185253086..185253091,+	2.89681	4.70654	8.39882	0	0	0	0	0	0	0	0	0	0	0	0	0	0	0	0.469184	0	0	0	0	0	0	0.56665	NA
chr1:185302452..185302469,-	0	0	0	2.01772	0	0	0.24443	0.298179	0	0	0	0	0	0	0	0	0	0	0	0	0	0	0	0	0	0	NA
chr1:185306152..185306197,-	4.44177	4.11823	1.95321	28.006	14.0218	11.884	9.0439	6.55993	10.7135	9.61843	4.69772	2.81862	1.96646	6.38942	5.71287	4.44132	4.97103	0	2.8151	5.83488	0	6.22722	10.3778	0	2.025	2.83325	NA
chr1:185306202..185306217,-	1.54497	0	2.14854	8.39373	9.87901	9.39666	4.88859	4.1745	4.27138	3.60691	2.93608	3.1318	2.45807	3.19471	2.59676	1.63628	1.95291	1.87406	2.8151	5.18656	0	4.67042	4.15113	0	1.215	1.51107	NA
chr1:185306224..185306254,-	4.05553	3.82407	3.32047	18.3209	13.0658	14.6477	8.31061	8.94536	5.67183	6.25198	3.52329	5.95042	4.17872	3.77557	5.71287	6.31135	3.55074	9.37031	7.50694	6.4832	0	5.62845	6.2267	1.39036	2.43	3.02213	NA
chr1:185306260..185306271,-	0.193121	0.294159	0.195321	5.00395	0.956033	0.829117	0.977719	0	0.840271	0.240461	1.46804	0.31318	0.245807	0.290428	0.519352	0	0.355074	0	0	0.64832	0	0.479017	0	0	0	0	NA
chr1:185306790..185306815,+	4.05553	3.82407	3.12514	15.3347	12.1098	11.6076	8.79947	8.94536	10.3633	12.9849	5.57855	3.1318	4.91614	3.77557	12.9838	3.74006	7.98916	1.87406	7.03775	14.263	0	6.94575	14.529	2.78073	0.405	4.34432	NA
chr1:185465729..185465744,-	0.193121	0.294159	0.195321	0.322836	0.318678	0.829117	0.488859	0.596357	0.490158	1.2023	1.17443	0.62636	1.22904	2.033	10.9064	2.10378	0.532611	5.62219	2.8151	5.83488	0	0.239509	0	0	0	1.69995	NA
chr1:185466092..185466111,+	3.66929	5.29486	2.92982	0.403545	0.956033	0.829117	0.24443	1.49089	2.87093	4.08783	2.05525	6.57678	8.11164	4.64685	10.387	3.97381	5.14857	0	3.28428	5.18656	5.10245	2.15558	0	0	1.215	9.63305	NA
chr1:185466125..185466137,+	0.386241	1.76495	0.781286	0.484253	0	0	0	0.298179	0.700226	0.721382	0.880823	1.5659	2.94969	3.19471	3.63546	2.57129	4.97103	0	2.34592	1.94496	0	0.239509	0	0	1.215	8.31086	NA
chr1:185503529..185503531,+	0	0	0	0	0	0	0	0	0	0	0	0	0	0	0	0	0	0	0	0	5.10245	0	0	0	0	0	NA
chr1:185510961..185510964,+	3.66929	6.17734	1.95321	0.0807089	0.637355	1.10549	0.733289	2.08725	0.210068	2.40461	5.57855	7.51632	5.65357	6.97028	9.86768	10.5189	9.58699	13.1184	7.03775	11.0214	0	1.19754	4.15113	4.17109	3.24	10.7663	NA
chr1:185523856..185523882,-	27.4231	17.9437	21.29	0.0807089	0	0.552745	0.488859	0.596357	0.840271	0.721382	0	0.31318	0.737422	1.45214	0	0	0.710148	1.87406	0.469184	1.29664	5.10245	0	0	0	0	6.42203	Aortic
chr1:185523884..185523904,-	27.4231	22.0619	18.1649	0.0807089	0.318678	0	0	0	0.840271	1.2023	0.293608	0.62636	0.737422	0	0	0.467507	1.4203	0	0.938367	0	0	0.119754	0	0	0	7.9331	Aortic
chr1:185523907..185523919,-	7.91795	6.4715	10.352	0.0807089	0.637355	0	0.24443	0	0.420135	0.480922	0.293608	0.31318	0.245807	1.16171	0.519352	1.40252	1.59783	0	2.8151	0.64832	0	0.119754	0	0	0	2.45548	NA
chr1:185523928..185523937,-	4.82802	5.58902	7.03157	0.161418	0	0	0	0	0.490158	0.721382	0.587216	0	0.491614	0.580857	0.519352	0.233754	0.355074	0	0	0	0	0	0	0	0	2.45548	NA
chr1:185537360..185537386,-	2.31745	1.47079	1.17193	5.08466	2.8681	3.0401	2.19987	2.68361	2.94095	2.88553	2.34886	2.19226	2.45807	4.64685	2.59676	1.40252	1.06522	0	1.87673	3.88992	0	1.91607	0	6.95182	4.455	1.32218	NA
chr1:185537482..185537493,+	14.2909	6.4715	9.37543	40.3545	16.2526	22.9389	12.7103	14.9089	14.2846	20.6796	7.6338	8.14268	9.58648	10.7459	4.15481	3.97381	7.98916	5.62219	5.6302	4.53824	10.2049	11.0174	2.07557	1.39036	3.645	4.72208	NA
chr1:185537501..185537523,+	76.4758	95.6017	87.6994	166.018	84.1309	112.76	91.6611	94.5227	118.478	134.418	111.571	98.3386	62.1892	70.2837	61.8029	73.1649	62.493	24.3628	64.2781	58.9971	20.4098	125.502	83.0226	82.0314	72.09	69.8868	NA
chr1:185691390..185691404,-	5.21426	4.70654	2.92982	17.0296	12.4284	13.8186	10.7549	11.9271	10.9235	15.8704	11.7443	10.0218	6.8826	6.099	11.9451	4.20757	4.43842	9.37031	5.16102	17.5046	10.2049	6.94575	10.3778	8.34218	4.05	2.64437	NA
chr1:185691410..185691425,-	2.12433	4.11823	2.92982	8.87798	5.7362	4.14559	1.46658	2.98179	6.65214	5.29014	2.34886	3.44498	3.4413	3.77557	2.59676	1.16877	1.95291	3.74813	2.34592	1.29664	5.10245	2.39509	2.07557	6.95182	2.43	2.07772	NA
chr1:185691544..185691551,+	0.193121	0	0.195321	2.98623	0.637355	1.65823	1.46658	1.49089	1.75056	2.16415	0.880823	0.62636	0.737422	0.290428	2.07741	0.467507	0.710148	1.87406	0.469184	2.59328	0	1.19754	0	1.39036	0	0.188883	NA
chr1:185691573..185691625,+	17.9602	12.3547	13.6725	65.8585	27.725	42.5614	35.4423	37.8687	52.0268	40.3974	32.0032	24.428	19.4188	22.0726	23.3708	22.6741	18.9965	13.1184	12.668	17.5046	0	41.0757	41.5113	20.8554	14.175	17.9439	NA
chr1:185751187..185751214,-	0.579362	0.294159	1.36725	11.2185	4.78017	3.31647	1.71101	3.57814	4.76154	3.84737	2.34886	4.38452	4.17872	3.77557	4.15481	8.41513	9.40946	3.74813	5.6302	0	0	6.10747	10.3778	2.78073	1.215	6.7998	NA
chr1:185751231..185751245,-	0.193121	0.294159	0.781286	4.11615	3.18678	3.0401	0.733289	0.596357	1.19038	1.44276	0.880823	1.25272	1.47484	1.16171	1.55806	1.87003	3.3732	1.87406	1.40755	0	0	1.67656	6.2267	1.39036	0.405	0.56665	NA
chr1:185798272..185798280,+	0	0	0	0	0	0	0	0	0	0	0	0	0	0	0.519352	0.701261	0.177537	0	0.938367	0	0	0	0	176.576	125.55	0	hepatocytes
chr1:185861145..185861181,-	17.1877	14.7079	13.8678	48.9096	19.1207	22.6625	16.6212	16.3998	27.2388	14.6681	9.68906	11.2745	6.8826	7.55114	11.9451	5.37633	13.4928	1.87406	9.38367	11.0214	5.10245	13.173	16.6045	11.1229	8.505	16.8106	NA
chr1:185870776..185870806,-	14.484	0.882477	13.8678	4.27757	4.78017	4.14559	8.55504	12.2253	12.324	12.9849	22.3142	25.3676	22.1226	15.9736	11.9451	6.5451	6.56887	3.74813	8.4453	14.9114	10.2049	8.3828	6.2267	82.0314	46.17	7.36645	NA
chr1:185870808..185870834,-	10.8148	4.41238	8.98479	4.5197	2.54942	7.18568	5.37745	8.05083	10.2933	9.37797	20.2589	22.549	23.3517	20.9108	17.1386	8.88264	9.23192	5.62219	11.7296	31.1194	5.10245	7.30501	10.3778	118.181	93.15	18.6994	NA
chr1:185870954..185870967,+	16.8015	15.2963	16.0164	44.5513	29.9557	40.074	36.6644	38.4651	39.3527	29.3362	16.1484	9.3954	10.0781	12.198	28.045	12.8565	28.5834	26.2369	25.3359	33.0643	5.10245	24.0706	24.9068	30.588	12.555	8.87751	NA
chr1:185877231..185877235,+	0	0	5.07836	0.484253	0	0	0.24443	0	0	0	0.293608	0	0	0	0	0	0	0	0	0	0	0.239509	0	0	0	0	NA
chr1:185892346..185892357,-	2.89681	3.23575	2.53918	0.72638	2.23074	2.76372	3.66644	2.08725	0.140045	3.12599	5.28494	2.81862	5.16195	6.099	3.63546	5.84384	3.55074	3.74813	2.8151	2.59328	0	7.54452	10.3778	2.78073	2.43	1.51107	NA
chr1:185892375..185892384,-	2.31745	5.0007	2.53918	0.242127	1.59339	2.48735	3.17759	3.27997	0.630203	3.60691	3.22969	4.38452	3.4413	8.132	2.59676	10.0514	2.48552	5.62219	9.85285	3.88992	5.10245	5.62845	2.07557	4.17109	5.265	1.51107	NA
chr1:185922070..185922078,-	0.193121	0.294159	0	4.43899	0.956033	1.10549	1.22215	0.894536	0.700226	0.721382	0.880823	0.93954	0	0.290428	0	0.233754	0.177537	1.87406	0	0	0	1.3173	0	0	0	0	NA
chr1:185922116..185922123,-	0	0	0.195321	4.43899	1.27471	1.10549	0.24443	1.19271	1.47047	0.961843	0.293608	0	0	0.290428	0.519352	0.467507	1.06522	0	0	0	0	0.958034	0	0	0	0	NA
chr1:185922132..185922159,-	5.21426	3.82407	4.88304	36.7226	10.835	17.9642	10.5105	12.5235	20.0265	14.1872	9.10184	7.20314	6.63679	6.67985	6.75157	8.41513	11.0073	0	6.09939	5.83488	0	18.2026	10.3778	4.17109	4.455	6.42203	NA
chr1:185946312..185946373,+	39.976	15.2963	25.1965	2.98623	3.50545	4.42196	4.1553	5.96357	10.0833	11.3017	14.3868	14.7195	12.782	13.3597	14.0225	7.94762	7.45655	7.49625	7.50694	17.5046	0	11.0174	8.30226	16.6844	6.075	10.5775	NA
chr1:186063572..186063585,+	4.6349	1.76495	18.9462	0	0	0.276372	0	0	0	0	0	0	0	0	0	0	0	0	0	0	0	0	0	0	0	0	NA
chr1:186240234..186240267,+	28.5819	30.2984	28.9076	5.16537	12.4284	12.1604	9.28833	10.4363	4.27138	5.77106	4.99133	3.75816	5.65357	6.099	1.55806	3.97381	14.9131	1.87406	5.16102	3.2416	107.151	4.55066	8.30226	83.4218	40.095	23.9882	NA
chr1:186427988..186427995,+	0	0	0	0	0	0	0	0	0.0700226	0	0	0	0	0	3.11611	0	0	5.62219	4.22265	0	0	0	0	2.78073	0	0	NA
chr1:186850067..186850096,-	0.965603	2.05911	0.390643	0.322836	0.318678	0.552745	0.24443	2.68361	3.64117	3.60691	9.98266	15.3458	12.782	7.55114	5.19352	8.18138	9.23192	0	5.16102	5.83488	0	1.67656	0	0	0	0	NA
chr1:186971289..186971290,+	7.53171	0	0.195321	0	0	0	0	0	0.350113	0	0.587216	0	0.245807	0	0	0.233754	0.177537	0	0	0	0	3.83214	6.2267	0	0	1.69995	NA
chr1:187287085..187287088,+	0	0	0	2.25985	4.78017	4.42196	10.0216	3.57814	0.980316	5.29014	9.98266	10.6481	22.6143	27.3003	13.5031	0	0	0	0	0	0	0	0	0	0	0	NA
chr1:187635764..187635767,+	0.579362	0	0.585964	3.55119	0.637355	0.276372	0.733289	0.894536	0.840271	0.961843	0	0.31318	0	0.871285	1.0387	0.467507	0.177537	0	0	0	0	0.479017	0	0	1.215	0.755533	NA
chr1:187635866..187635950,+	57.1637	64.715	79.3005	286.032	123.966	129.895	79.4396	96.3117	118.478	75.5047	48.4453	55.7461	38.5917	29.0428	22.8515	30.388	41.1886	20.6147	31.9045	21.3946	0	59.1586	51.8891	93.1543	85.86	41.3654	NA
chr1:187651411..187651416,+	14.2909	8.53061	7.2269	3.87403	1.91207	6.35657	4.64416	2.38543	2.59084	5.77106	5.87216	2.50544	2.21226	4.066	2.07741	2.33754	1.24276	0	1.87673	0.64832	0	6.70624	2.07557	18.0747	10.125	6.98868	NA
chr1:187720593..187720602,-	1.54497	8.23645	6.83625	0.242127	0.318678	0	0	0	0.0700226	0	0	0	0.245807	0	0	0	0.355074	1.87406	0.938367	0.64832	5.10245	0	0	0	0	0.188883	NA
chr1:187720612..187720634,-	12.746	40.0056	43.5567	0.161418	0	0.552745	0.977719	0.298179	0.980316	0.721382	2.05525	1.25272	0.983229	1.45214	3.63546	0.935015	0.532611	11.2444	9.85285	1.29664	20.4098	0.119754	0	4.17109	2.43	1.69995	NA
chr1:187720652..187720661,-	2.12433	5.88318	6.05497	0.242127	0	0.276372	0	0.298179	0.140045	0.721382	0	0.31318	0.491614	0.290428	0.519352	0	0.887685	0	0	0.64832	0	0.479017	2.07557	1.39036	0.405	0.377767	NA
chr1:187793200..187793215,+	8.69043	10.5897	8.2035	0.887798	0.318678	1.10549	1.71101	0.894536	2.73088	1.68323	2.93608	1.5659	1.22904	1.45214	2.59676	1.63628	3.72828	0	0.938367	1.94496	0	2.03582	6.2267	0	0	1.88883	NA
chr1:187793225..187793235,+	5.40738	3.23575	3.90643	0.484253	0	0.552745	0.488859	0.298179	0.910293	0.721382	0.587216	1.25272	1.72065	0.871285	2.59676	1.40252	2.13044	0	0	1.29664	0	3.71238	2.07557	0	0	1.51107	NA
chr1:187793252..187793267,+	24.9126	17.3554	33.0093	0.322836	0.637355	0	0.488859	0.596357	0.840271	0.961843	1.17443	0.31318	1.96646	2.32343	5.19352	3.0388	9.23192	3.74813	3.75347	3.88992	0	2.03582	6.2267	0	0	0.56665	NA
chr1:187923997..187923999,+	2.12433	3.52991	2.53918	0	0	0	0	0	0	0	0	0	0.245807	0.290428	0	0	0	0	0	0	0	0	0	0	0	0.188883	NA
chr1:187970389..187970396,-	0	0	0	0	0	0	0	0	0	0	0	0	0.491614	0.580857	0	1.16877	5.85872	0	0.469184	0	0	0	0	0	0	0	NA
chr1:187970414..187970424,-	0	0	0	0	0	0	0	0	0	0	0	0	0	0.290428	0.519352	1.87003	8.87685	0	0	0	0	0	0	0	0	0	NA
chr1:187970455..187970472,-	0	0	0	0	0	0	0	0	0	0	0	0	0	0.290428	0	2.80504	11.5399	0	0.469184	0	0	0	0	0	0	0	middle_late
chr1:18805204..18805212,-	0	0.294159	0	4.5197	1.59339	1.93461	0.488859	0.298179	1.26041	2.40461	0	0.62636	0.491614	0	0	0.701261	0	0	0	0	0	0.119754	0	0	0.405	0	NA
chr1:18805224..18805281,-	5.21426	6.17734	3.32047	64.8093	18.1646	19.0697	14.4214	8.349	15.6851	15.63	8.80823	7.20314	7.37422	7.26071	8.82898	5.14258	6.92394	3.74813	4.22265	2.59328	5.10245	7.78403	8.30226	8.34218	2.835	4.15543	NA
chr1:18805293..18805311,-	1.35184	0.588318	1.36725	9.9272	5.09884	5.52745	3.66644	2.08725	3.08099	4.80922	3.52329	5.01088	3.19549	2.90428	7.27092	1.63628	2.84059	7.49625	3.75347	3.2416	0	2.39509	8.30226	2.78073	1.62	1.69995	NA
chr1:18805312..18805350,-	6.17986	7.94229	8.39882	45.3584	17.2086	12.4368	11.9771	9.24354	14.2846	10.8207	8.22102	13.4667	14.9942	9.00328	7.79028	13.7915	13.8479	3.74813	15.4831	12.9664	25.5122	10.2989	4.15113	8.34218	6.075	12.8441	NA
chr1:18815475..18815486,-	0	0.588318	0.390643	0.887798	0	0.276372	0.488859	0.596357	0.420135	0	0.293608	0	0.491614	0.290428	1.55806	0	0.710148	0	0.469184	0.64832	0	0.119754	0	0	0	0	NA
chr1:18815723..18815781,+	20.6639	15.5904	22.6573	54.2364	19.1207	22.6625	16.3768	21.1707	26.5386	21.401	14.6804	21.6094	16.7149	13.9406	15.5806	17.2978	17.2211	1.87406	8.4453	8.42816	10.2049	17.4841	18.6801	11.1229	8.91	22.666	NA
chr1:18815846..18815860,+	0.772483	0.294159	0.390643	3.79332	1.59339	3.0401	2.19987	1.49089	1.68054	1.68323	0.880823	0.31318	0.737422	0.871285	1.55806	1.87003	0.532611	0	0.469184	0	0	1.3173	0	0	0	0.377767	NA
chr1:188231520..188231523,+	0	0	0	0	0	0	0	0	0	0	0	0	0	0	2.07741	0	0	1.87406	2.8151	0	0	0	0	0	0	0	NA
chr1:188310800..188310811,+	10.8148	10.0014	13.8678	5.24608	2.23074	3.0401	4.64416	4.1745	6.02194	5.04968	5.57855	4.07134	2.21226	2.32343	4.15481	3.0388	2.66305	3.74813	1.40755	3.88992	0	1.07779	0	4.17109	0.81	16.0551	NA
chr1:188310955..188310981,+	28.1956	22.3561	26.759	21.5493	23.5822	31.5065	40.8198	56.0576	50.9064	63.0007	44.0412	42.2793	17.4523	25.5577	25.4482	9.35015	7.63409	16.8666	21.1133	29.8227	25.5122	6.46673	12.4534	51.4434	36.45	152.807	NA
chr1:188310997..188311016,+	35.9204	21.4736	45.3146	301.771	176.866	233.811	267.162	420.134	394.927	456.395	481.223	445.029	45.2285	197.491	166.193	10.9864	7.45655	20.6147	32.3737	66.1287	15.3073	7.0655	8.30226	19.4651	26.73	902.673	Mesenchymal
chr1:188343773..188343785,+	1.54497	9.41309	4.29707	0.564962	0.637355	0	0	0	0.140045	0	0	0	0.245807	2.033	0.519352	0.701261	6.39133	0	0	0	0	0.359263	0	0	0	0	NA
chr1:18864859..18864903,-	49.0526	47.3596	43.9473	15.0119	10.835	18.7933	27.6206	31.3088	34.101	29.5767	30.5352	20.9831	15.9775	23.2343	19.7354	14.7265	12.0725	13.1184	7.97612	20.7462	10.2049	21.3163	24.9068	19.4651	19.44	41.9321	NA
chr1:18864947..18864959,-	4.24865	6.4715	5.07836	4.19686	1.27471	4.69833	1.95544	6.85811	8.0526	5.5306	4.11051	4.6977	2.45807	1.45214	1.55806	1.40252	2.30798	0	0	3.2416	0	1.91607	4.15113	5.56145	7.29	4.15543	NA
chr1:18864967..18864979,-	1.73809	1.76495	2.92982	2.34056	0.637355	0.829117	2.68873	1.78907	4.69151	0.961843	1.76165	0.62636	1.72065	0.580857	0.519352	0.467507	0.710148	0	0.469184	0	0	1.43705	0	8.34218	2.835	2.2666	NA
chr1:18865242..18865268,+	15.0634	12.0605	13.8678	8.63585	6.37355	3.86921	3.91087	3.27997	5.46176	5.29014	4.69772	1.87908	2.21226	4.93728	5.71287	0.935015	3.3732	3.74813	4.69184	3.88992	0	2.63459	2.07557	2.78073	2.835	8.49975	NA
chr1:18865298..18865324,+	18.7327	15.8846	20.8994	3.6319	3.82413	3.0401	6.5996	8.64718	12.6741	12.7444	9.68906	6.88996	6.63679	4.35643	5.71287	2.10378	4.08335	3.74813	2.8151	5.83488	0	4.55066	0	2.78073	8.91	17.5661	NA
chr1:18865330..18865348,+	8.30419	3.52991	4.88304	2.34056	1.27471	2.48735	5.13302	9.24354	9.03291	10.8207	3.8169	5.01088	4.17872	3.48514	2.59676	1.40252	2.48552	0	2.8151	5.83488	0	2.63459	4.15113	31.9784	9.71999	10.9552	NA
chr1:18865359..18865396,+	32.6374	22.3561	23.6339	7.50593	4.14281	10.2258	10.0216	17.2944	26.3285	20.1987	7.6338	11.5877	7.62002	8.42242	9.86768	3.5063	9.23192	3.74813	8.4453	3.2416	0	7.78403	8.30226	70.9085	40.905	25.6881	NA
chr1:18865402..18865412,+	4.24865	2.35327	4.10175	1.21063	0.956033	1.93461	1.95544	5.06904	3.85124	3.36645	2.05525	1.5659	1.72065	0.871285	0.519352	0.935015	1.4203	0	0	0	0	0.958034	4.15113	2.78073	5.265	6.61091	NA
chr1:18865425..18865442,+	3.66929	3.52991	1.56257	2.50198	1.91207	3.59284	3.66644	7.15629	7.1423	8.65659	2.93608	4.07134	3.4413	3.48514	2.59676	1.16877	1.24276	1.87406	0	0.64832	0	2.63459	4.15113	2.78073	3.24	8.12198	NA
chr1:188765960..188766001,-	24.3332	24.4152	21.0947	28.4902	14.6592	18.7933	19.7988	21.767	30.0397	22.3629	32.8841	39.4607	32.6924	32.528	28.045	23.1416	22.3697	28.1109	53.0177	49.9207	107.151	23.5916	29.0579	158.501	193.995	46.8431	NA
chr1:188780579..188780595,+	38.6241	17.3554	55.6666	1.93701	0.637355	1.38186	0.977719	0.298179	1.40045	1.68323	4.11051	6.88996	8.60325	5.80857	12.9838	7.94762	18.4638	3.74813	23.4592	9.07648	107.151	7.42477	12.4534	87.5929	68.445	11.333	extraembryonic
chr1:188871460..188871467,-	3.66929	6.17734	0.781286	0.0807089	0	0	0	0	0.0700226	0	0	0	0.245807	0	1.0387	0	0	0	0	0	0	0	0	0	0.81	2.07772	NA
chr1:188871505..188871530,-	4.24865	6.4715	7.03157	0.0807089	0	0.276372	0.24443	0	0.210068	0	0.587216	0.62636	0.491614	0.290428	0	0.701261	0.532611	1.87406	1.40755	1.29664	0	0.119754	0	0	0.405	1.69995	NA
chr1:188871600..188871610,-	8.49731	10.5897	9.37543	0	0	0	0	0	0.140045	0.240461	0	0.31318	1.72065	2.033	2.07741	1.40252	2.84059	1.87406	6.56857	9.07648	5.10245	0.119754	0	0	0	3.96655	NA
chr1:188871679..188871685,-	2.70369	3.52991	3.12514	0.0807089	0	0	0	0	0	0	0	0	0	0.290428	0	0.233754	0.177537	0	0	0	0	0	0	0	0.405	1.51107	NA
chr1:188871714..188871736,-	16.029	18.2379	23.6339	0.807089	0	0	0.977719	0.298179	0.28009	0.240461	0.587216	2.19226	2.94969	1.16171	0	0.701261	3.55074	1.87406	4.22265	3.88992	0	0	0	2.78073	1.62	8.31086	NA
chr1:188871779..188871788,-	6.75922	5.58902	8.59415	0.242127	0.956033	0	0	0	0.210068	0.240461	0	0	0.491614	0	1.0387	0	0.710148	1.87406	1.40755	2.59328	0	0.119754	0	0	0	1.69995	NA
chr1:188875735..188875746,+	2.12433	1.17664	7.2269	0	0	0	0	0	0.0700226	0	0	0	0	0	0	0.233754	0	0	0.469184	0	0	0	0	0	0	0	NA
chr1:188917113..188917149,+	4.24865	7.94229	7.03157	0.887798	0.318678	1.65823	1.46658	1.78907	3.36108	4.08783	3.8169	5.63724	8.35744	7.55114	10.9064	9.5839	9.23192	11.2444	20.6441	14.9114	5.10245	3.59263	12.4534	0	0	2.2666	NA
chr1:189046549..189046563,-	0.579362	1.17664	0.585964	18.4823	3.82413	9.39666	6.35517	16.1017	13.5144	15.3895	1.46804	4.38452	2.70388	3.19471	2.07741	3.5063	4.97103	1.87406	6.56857	0	5.10245	0.598771	0	0	0.405	0.56665	NA
chr1:189046571..189046576,-	0.193121	0	0.195321	2.01772	0	0.829117	0.24443	0	1.33043	0.480922	0	0.31318	0.491614	0.290428	0	0.233754	0	0	0	0	0	0.119754	0	0	0	0.188883	NA
chr1:189093587..189093599,-	2.51057	0.882477	0.781286	40.3545	23.9008	33.7174	19.5544	19.978	15.405	17.7941	27.8927	16.5985	24.3349	30.7854	26.4869	33.193	27.5182	41.2294	22.5208	43.4375	5.10245	13.0532	20.7557	19.4651	23.49	232.893	NA
chr1:189093672..189093697,-	0	1.47079	0.976607	1.21063	0.637355	0	0.733289	0.596357	1.26041	0.961843	1.76165	0.62636	1.47484	0.871285	1.0387	0.467507	0.710148	0	0	0.64832	5.10245	0.598771	0	4.17109	0.405	4.34432	NA
chr1:189094021..189094058,+	2.70369	2.64743	1.95321	12.8327	4.78017	6.90931	5.86631	4.1745	7.70248	5.04968	5.87216	5.01088	3.93291	3.19471	2.59676	2.57129	2.30798	1.87406	3.28428	2.59328	0	3.47287	6.2267	1.39036	2.835	3.96655	NA
chr1:189150858..189150896,-	0	0.588318	0.195321	21.5493	7.32959	3.86921	2.4443	1.49089	2.03065	2.88553	1.46804	2.50544	2.70388	2.033	3.11611	1.63628	1.95291	1.87406	2.8151	1.94496	0	0.359263	0	25.0265	25.11	5.09985	NA
chr1:189150899..189150912,-	0	0	0	13.6398	4.46149	4.9747	1.71101	0.894536	1.75056	1.68323	2.05525	1.25272	2.21226	1.45214	0	1.40252	1.06522	0	1.40755	0	0	1.19754	0	11.1229	7.695	2.07772	NA
chr1:189150946..189150958,-	0	0.294159	0.195321	9.0394	3.50545	2.48735	0.488859	0.596357	0.210068	0	0.587216	0	0.983229	0.871285	0	0.467507	1.24276	1.87406	0.938367	0.64832	0	0.119754	2.07557	4.17109	4.455	1.88883	NA
chr1:189151022..189151031,-	0.386241	0	0.390643	5.56892	2.23074	1.38186	1.22215	1.49089	1.68054	1.68323	0.587216	1.87908	1.22904	2.32343	1.0387	0.701261	1.59783	0	1.40755	0	0	0.359263	0	6.95182	4.05	1.32218	NA
chr1:189151035..189151078,-	3.66929	6.4715	4.29707	38.4174	22.9448	21.0043	13.1992	10.7344	13.3743	16.5918	17.9101	17.5381	24.0891	24.396	28.5643	14.7265	23.9675	9.37031	14.5447	40.1959	10.2049	13.652	14.529	22.2458	23.085	18.5106	NA
chr1:189151255..189151301,+	2.12433	1.17664	1.75789	3.6319	3.18678	3.86921	3.42202	3.27997	5.32172	3.12599	5.28494	5.95042	7.86583	13.6501	16.6193	6.5451	7.98916	3.74813	9.38367	22.0429	5.10245	5.02968	2.07557	8.34218	5.265	4.5332	NA
chr1:189174250..189174279,+	8.69043	7.94229	10.7427	93.6223	70.4278	64.1184	30.0648	29.2215	20.3766	28.6148	24.0758	18.1644	18.1897	21.2013	35.3159	12.1552	15.8008	13.1184	17.829	42.1408	0	14.4903	20.7557	29.1976	26.73	6.98868	NA
chr1:189174295..189174302,+	0.579362	2.35327	0.781286	2.7441	0.637355	0.276372	0.733289	0.298179	0.630203	0.721382	0	0.62636	0.983229	0.290428	1.0387	1.16877	1.4203	3.74813	0.938367	1.94496	10.2049	0.598771	2.07557	4.17109	4.86	1.51107	NA
chr1:189174319..189174345,+	3.86241	6.17734	3.71111	26.1497	9.87901	12.9895	11.2438	11.0326	9.10293	7.93521	5.87216	3.75816	6.8826	9.00328	11.4257	8.88264	17.0435	24.3628	12.668	19.4496	0	11.0174	10.3778	9.73254	10.125	6.98868	NA
chr1:189221004..189221048,-	29.1612	28.8276	33.2047	41.8072	19.758	31.7828	27.6206	27.1343	30.88	27.1721	19.9653	24.7412	21.3852	15.1023	16.6193	10.7527	19.3515	11.2444	21.1133	25.9328	15.3073	22.1545	12.4534	6.95182	7.29	25.4992	NA
chr1:189358567..189358568,+	0	0	0	0	0	0	0	0	0	0	0	0	0	0	1.0387	0	0	0	0.938367	0	0	0	0	0	0	0	NA
chr1:189426359..189426384,-	1.73809	1.17664	1.56257	0	0	0	0	0	0	0	0	0	0	0	1.55806	4.44132	5.50364	1.87406	3.75347	0	0	0	0	0	0	0.188883	NA
chr1:18944161..18944164,-	0	0	0	0	0	0	0	0	0	0	0	0	0	0	0	0	0	1.87406	0	0	0	0	0	0	0	0	NA
chr1:189606236..189606245,+	0	0	0	0	0	0	0	0	0	0	0	0	0	0	0	0	0	9.37031	0	0	0	0	0	0	0	0	NA
chr1:189634119..189634133,-	0	0	0	0	0.318678	0	0	0	0.0700226	0	0.293608	0	0	1.16171	0	0.467507	7.63409	1.87406	1.87673	0	0	0	0	0	0	0	NA
chr1:190034943..190034944,+	0	0	0	0	0	0	0	0	0	0	0	0	0	0	8.82898	0	0	0	2.8151	0	0	0	0	0	0	0	NA
chr1:190052015..190052037,-	8.69043	8.82477	13.6725	1.53347	8.6043	3.31647	2.4443	1.49089	1.19038	2.16415	1.46804	0.93954	1.47484	3.19471	0.519352	2.10378	5.14857	0	0	1.29664	0	2.63459	2.07557	54.2242	18.63	5.47761	NA
chr1:190158778..190158785,-	0	0	0	0	0	0	0	0	0	0	0	0	0	0.290428	1.0387	6.31135	3.90581	0	0.469184	0	0	0.239509	0	0	0	0	NA
chr1:190311631..190311659,+	5.02114	3.23575	5.27368	8.55515	7.32959	9.39666	7.08846	5.96357	8.61278	10.0994	11.1571	7.8295	8.11164	7.84157	6.23222	3.5063	3.72828	1.87406	4.69184	12.3181	5.10245	5.02968	4.15113	8.34218	4.86	3.21102	NA
chr1:190311676..190311686,+	0.772483	0.882477	0.976607	0.645671	0.637355	0.276372	0.488859	1.49089	1.61052	0.961843	0.587216	0.93954	0.491614	0.580857	0.519352	0	1.06522	0	0.938367	0	0	1.79631	0	4.17109	0.405	0.755533	NA
chr1:190311694..190311716,+	4.24865	2.05911	2.7345	5.64962	3.50545	6.35657	3.42202	7.75265	6.72217	8.41613	7.34019	5.63724	6.14518	3.48514	3.11611	2.80504	1.59783	0	2.8151	1.29664	0	5.38894	8.30226	4.17109	6.885	2.45548	NA
chr1:190383131..190383143,-	17.9602	20.5911	18.1649	11.2992	8.28562	8.29117	9.77719	16.9962	20.4466	16.8323	9.39545	6.88996	4.17872	8.132	11.9451	3.5063	9.40946	16.8666	21.1133	22.6912	5.10245	1.79631	4.15113	0	0.405	1.88883	NA
chr1:190483754..190483781,-	209.729	270.92	187.509	39.0631	8.6043	10.7785	6.84403	8.64718	14.9848	13.4658	13.506	15.9722	11.7987	11.0363	12.4644	8.41513	14.558	3.74813	10.322	8.42816	15.3073	13.8915	4.15113	4.17109	1.62	48.1652	Aortic
chr1:190483936..190483944,-	3.28305	5.29486	5.27368	1.37205	0	0.276372	0.977719	0.298179	0.700226	0.240461	0.587216	0.62636	1.96646	1.16171	0.519352	1.16877	1.77537	0	2.34592	0.64832	0	0.598771	2.07557	0	1.62	1.88883	NA
chr1:190483948..190483966,-	9.84915	17.3554	12.5006	5.81104	1.27471	3.0401	1.95544	1.78907	4.13133	3.36645	5.87216	5.01088	8.84906	5.22771	5.71287	6.31135	13.3153	1.87406	6.56857	6.4832	0	3.83214	2.07557	6.95182	5.265	6.23315	NA
chr1:190535910..190535942,+	14.0978	10.5897	8.00818	7.50593	3.50545	7.46206	3.91087	5.06904	5.11165	3.12599	0.880823	1.25272	2.70388	2.61386	3.63546	1.40252	3.90581	0	2.34592	2.59328	5.10245	6.58649	6.2267	1.39036	0.405	9.44416	NA
chr1:190542315..190542319,+	0.579362	2.94159	2.14854	0.968507	0.318678	0.552745	1.95544	0.596357	0.490158	2.88553	1.76165	5.01088	3.93291	0.580857	1.55806	1.63628	1.24276	0	0	0	0	2.15558	2.07557	0	0	0.377767	NA
chr1:190571646..190571677,-	81.8832	101.191	84.7695	73.3644	51.3071	72.9623	74.0622	70.9665	74.434	73.581	67.5298	79.8609	77.6751	65.9272	68.5544	62.646	56.2792	67.4663	77.4153	62.8871	30.6147	68.1402	80.947	36.1494	48.6	49.6763	NA
chr1:19089586..19089588,+	0	0	0	0	0	0	0	0	0	0	0	0	0	0	0	0	0	65.5922	2.34592	0	0	0	0	0	0	0	late
chr1:191585007..191585022,-	0	0	0	0.0807089	0.318678	0	0	0.298179	0.28009	0.721382	0	0.31318	0.245807	0	0.519352	0.233754	0.177537	0	0	1.29664	0	0.83828	2.07557	18.0747	13.365	0.188883	hepatocytes
chr1:191679739..191679743,+	2.31745	8.23645	4.49239	0.0807089	0	0	0	0	0	0	0	0	0.491614	0	0	0.935015	0.355074	1.87406	2.8151	1.29664	0	0.119754	0	0	0.405	2.07772	NA
chr1:19168751..19168761,-	57.3568	72.0689	67.5812	90.1519	44.9336	43.1141	30.3093	24.1525	22.6873	27.8935	34.3521	41.653	38.3459	29.0428	47.7804	20.8041	17.5762	56.2219	59.5863	68.0736	20.4098	4.31115	10.3778	34.7591	36.045	109.175	NA
chr1:191998748..191998765,+	0	0	0	0	0	0.276372	0.488859	2.68361	5.60181	11.5421	39.9307	37.8948	62.435	50.2441	58.6867	39.0369	26.9856	16.8666	15.9522	30.4711	0	12.5742	14.529	0	0.405	0	NA
chr1:192002277..192002280,+	0	0	0	0	0	0	0	0.298179	0.210068	0	5.87216	0.93954	1.72065	3.77557	2.07741	2.33754	3.01813	1.87406	0	0	0	0.718526	4.15113	0	0	0.188883	NA
chr1:192016616..192016620,+	0	0	0	0	0	0	0.24443	0.596357	0.28009	0.480922	5.87216	12.214	18.4355	1.16171	5.19352	0.233754	0.532611	1.87406	2.8151	0.64832	0	1.43705	2.07557	0	0	0.755533	middle
chr1:192026209..192026212,+	0	0	0	0	0	0	0.24443	0.596357	0.140045	0.961843	1.76165	5.32406	2.94969	3.19471	1.0387	3.74006	0.355074	0	0.469184	0	5.10245	0.598771	2.07557	0	0	0	NA
chr1:192093253..192093256,+	0	0	0	0	0	0	0	0	0.210068	0.721382	4.69772	3.44498	2.21226	6.67985	6.23222	2.80504	1.4203	1.87406	1.87673	1.94496	0	2.8741	2.07557	0	0	0	NA
chr1:192135258..192135260,+	0	0	0	0	0	0	0	0	0.350113	0.721382	5.28494	5.63724	13.2736	6.38942	7.79028	6.31135	3.19566	0	1.40755	2.59328	0	1.07779	2.07557	0	0	0	NA
chr1:192215191..192215202,+	0	0	0	0	0	0.276372	0.24443	9.8399	24.858	30.5385	32.5905	11.9008	1.96646	4.066	5.19352	0	0.177537	0	0	0.64832	0	0	0	0	0	0	NA
chr1:192215211..192215214,+	0	0	0	0	0	0	0	0.894536	2.8009	3.84737	4.40412	1.5659	0.983229	0.580857	1.0387	0	0	0	0	0.64832	0	0	0	0	0	0	NA
chr1:192215216..192215228,+	0	0	0	0.0807089	0	0	0	5.6654	20.0265	25.4888	34.6457	10.9613	2.21226	6.38942	3.11611	0.233754	0	0	0	0.64832	0	0.119754	0	0	0	0	NA
chr1:192256561..192256569,+	0.193121	0	0.195321	0	0	0	0	0.596357	0.350113	2.64507	6.75298	1.5659	7.62002	4.066	4.15481	4.44132	1.06522	0	0.938367	1.94496	0	0.479017	0	0	0	0	NA
chr1:192337426..192337427,+	0	0	0	0	0	0	0	0	0.0700226	1.2023	2.05525	0.62636	1.96646	3.19471	1.0387	0	0.355074	0	0	0	0	0	0	0	0	0	NA
chr1:192338014..192338025,+	0	0	0	10.6536	4.14281	4.69833	3.42202	5.96357	7.35237	8.65659	11.7443	10.0218	2.94969	2.90428	6.75157	17.2978	6.7464	0	0.938367	1.94496	0	10.2989	2.07557	0	0	0	NA
chr1:192338030..192338038,+	0	0	0	5.24608	3.82413	2.21098	2.68873	3.27997	4.3414	5.77106	4.99133	8.14268	2.45807	2.32343	7.27092	12.6227	5.50364	0	0	1.29664	0	7.78403	2.07557	0	0	0	NA
chr1:192338045..192338062,+	0	0.294159	0.195321	31.7186	18.4833	16.0296	18.5767	30.1161	36.3417	49.5349	47.8581	51.6747	20.8936	23.2343	31.1611	62.646	11.7174	3.74813	7.97612	5.83488	0	47.0634	35.2846	0	0	0	NA
chr1:192418496..192418500,+	0	0	0	0	0	0.276372	0.24443	0	0.210068	0.480922	2.05525	0.31318	4.67034	3.19471	0.519352	1.87003	0.887685	0	0	0	0	0.598771	0	0	0	0	NA
chr1:192444761..192444769,-	0	0	0	26.4725	12.7471	7.46206	11.7326	4.77086	3.50113	5.04968	0.293608	4.6977	1.96646	2.033	2.07741	0	0	0	0	0.64832	0	0	0	0	0	0	NA
chr1:192536274..192536275,+	0	0	0	0.242127	0.318678	0.552745	0.488859	0.298179	0.28009	2.40461	4.11051	6.2636	5.65357	4.93728	2.59676	7.24636	1.4203	0	1.40755	1.29664	0	2.63459	2.07557	0	0	0	NA
chr1:192670653..192670682,+	8.88355	9.41309	12.3053	10.3307	5.09884	8.0148	9.0439	8.64718	12.8141	8.89705	6.75298	8.76904	8.11164	5.51814	11.4257	3.5063	7.45655	3.74813	7.50694	18.153	0	4.90993	2.07557	20.8554	11.745	10.5775	NA
chr1:192670694..192670707,+	1.54497	3.82407	1.95321	5.4075	2.23074	3.59284	4.64416	5.06904	6.09196	5.29014	3.22969	2.19226	1.72065	2.033	2.59676	2.33754	6.21379	0	6.56857	5.18656	0	2.63459	4.15113	4.17109	0.81	1.32218	NA
chr1:192723460..192723462,+	0	0	0	0	0	0	0	0	0	0	0	0	0	0	0	0	0	0	0	0	0	0	0	0	0	0	NA
chr1:192735459..192735477,+	0.579362	0.882477	0.585964	1.45276	0.637355	0.276372	0.733289	0.596357	1.47047	0.961843	0.880823	1.25272	0.491614	1.74257	1.55806	2.57129	2.30798	1.87406	4.22265	3.2416	0	0.239509	0	2.78073	4.455	3.21102	NA
chr1:192793994..192793998,+	0	0	0	0	0	0	0	0	0	0	0	0	0	0	0	0	0	0	0.938367	0	0	0	0	2.78073	10.125	0	NA
chr1:192901787..192901801,-	0.579362	0.588318	0.390643	4.19686	1.27471	0.276372	0.488859	0.298179	0.28009	0	0	0	0	0	0	0.467507	0.710148	0	1.40755	0	0	0.119754	0	0	0	0.377767	NA
chr1:192901844..192901853,+	4.24865	2.94159	1.56257	0.161418	0	0.276372	0.488859	0	0.350113	0.721382	0.293608	0	0.491614	0.871285	0.519352	0.467507	2.48552	0	2.8151	1.29664	0	0.239509	0	2.78073	6.075	2.83325	NA
chr1:192915373..192915417,+	13.7116	9.70725	9.37543	29.4588	19.758	27.3609	25.9095	29.5197	23.1075	22.1224	24.3694	16.2854	15.4859	15.6831	24.4095	15.8952	14.0254	7.49625	13.6063	25.9328	5.10245	26.4657	35.2846	13.9036	8.91	9.25528	NA
chr1:192926291..192926345,+	66.8197	35.0049	40.0409	31.0729	17.5273	27.9136	33.9757	30.1161	29.4795	59.1534	47.2709	81.4268	48.6698	46.4685	33.7579	27.1154	26.6305	11.2444	55.8328	31.7677	15.3073	32.9324	58.1158	120.962	103.275	52.5095	NA
chr1:192926349..192926360,+	2.31745	2.35327	1.17193	3.38977	1.91207	3.0401	2.93316	2.38543	2.38077	6.25198	5.57855	5.32406	7.62002	6.38942	4.15481	6.77886	2.84059	0	3.75347	1.29664	0	5.38894	8.30226	6.95182	4.455	1.32218	NA
chr1:192935623..192935628,+	0.386241	0.588318	0	8.1516	4.14281	5.80382	2.4443	1.49089	0.980316	1.68323	10.5699	8.76904	10.8155	10.165	4.15481	12.1552	14.3805	7.49625	17.829	1.29664	0	0	0	763.309	494.505	2.64437	hepatocytes
chr1:192940010..192940022,+	0	0	0	0.0807089	0	0	0	0	0	0	0	0	0	0	0	0	0	0	0.938367	0	0	0	0	389.302	424.44	0	hepatocytes
chr1:192954474..192954503,+	10.8148	7.64813	8.59415	39.0631	20.7141	25.7026	23.2208	14.6108	25.3482	14.1872	13.7996	8.76904	10.8155	13.0693	9.86768	8.18138	13.4928	1.87406	7.03775	12.9664	0	15.089	8.30226	8.34218	17.415	8.68863	NA
chr1:192997508..192997535,-	8.30419	8.82477	8.00818	2.98623	3.18678	3.0401	3.66644	3.27997	5.60181	3.84737	6.16576	5.01088	5.65357	8.71285	7.27092	9.5839	9.05438	5.62219	13.1371	13.6147	10.2049	6.10747	2.07557	29.1976	19.44	10.1997	NA
chr1:192997677..192997690,+	0	0.294159	0.195321	4.35828	0.956033	2.76372	1.46658	1.19271	1.61052	2.88553	0.880823	0.31318	0.983229	1.16171	0	0.233754	0.710148	0	0.469184	1.29664	0	1.07779	0	0	0	0.377767	NA
chr1:192997824..192997846,+	17.9602	18.8262	17.1883	88.3763	38.2413	43.3905	34.9534	18.7853	30.88	28.6148	22.6078	15.3458	16.9607	16.5544	20.2547	21.9728	35.5074	0	13.6063	9.7248	5.10245	27.1842	16.6045	25.0265	17.01	20.2105	NA
chr1:193059167..193059226,+	24.9126	15.2963	19.3368	46.8112	21.9888	28.4664	23.7097	25.9415	33.4008	32.2217	25.2503	22.549	19.4188	21.4917	23.3708	15.4277	18.2863	1.87406	9.85285	14.263	5.10245	38.5609	29.0579	23.6362	17.415	21.5327	NA
chr1:193085572..193085612,-	0	0	0	0.161418	0	0	0	0.596357	0.210068	0.240461	1.17443	0.31318	0.245807	0	0.519352	0	0.355074	0	1.40755	1.94496	0	0	0	50.0531	41.31	0	hepatocytes
chr1:193108679..193108706,+	67.0129	84.1295	75.1988	48.2639	27.4063	25.1499	11.9771	12.2253	12.8141	11.7826	9.68906	10.9613	5.16195	9.29371	15.5806	15.194	9.76453	9.37031	15.4831	33.7127	5.10245	5.14943	10.3778	0	0.405	30.4102	NA
chr1:193140643..193140668,+	13.7116	1.17664	6.05497	0	0	0	0	0	0	0	0	0	0	0	0	0	0	0	0	0	0	0	0	0	0	0.944416	NA
chr1:193184528..193184568,+	0.193121	0	0.390643	0.161418	0.318678	0	0.24443	1.19271	0.980316	1.2023	3.8169	3.1318	1.96646	4.066	3.11611	10.2852	7.98916	0	1.87673	0	0	2.99386	0	0	0	0	NA
chr1:193267762..193267768,+	3.08993	4.41238	6.25029	0	0	0.276372	0.24443	0	0.0700226	0	0.293608	0	0.491614	0	0.519352	0	0.355074	0	1.40755	0.64832	0	0.119754	0	0	0.405	3.77767	NA
chr1:193318097..193318110,-	0	0	0	0	0	0.276372	0.488859	2.08725	2.45079	2.40461	10.2763	4.07134	11.3071	10.4554	6.23222	0.467507	0.532611	0	0.469184	20.0979	0	0.239509	0	0	0	0.188883	extraembryonic
chr1:193443550..193443571,-	32.6374	28.5334	32.0327	27.6832	8.6043	15.4769	10.5105	11.9271	19.7464	16.3513	19.6717	20.0435	21.1394	16.5544	3.11611	8.18138	10.1196	11.2444	7.97612	7.13152	0	11.1371	14.529	18.0747	14.985	42.6876	NA
chr1:193443614..193443621,-	1.15872	2.35327	1.56257	3.79332	1.27471	1.65823	1.95544	0.894536	2.52081	2.16415	1.76165	2.50544	1.96646	2.90428	5.71287	2.10378	3.01813	1.87406	2.34592	1.29664	0	1.55681	4.15113	1.39036	2.43	2.64437	NA
chr1:193496202..193496219,-	3.08993	1.76495	1.17193	9.60436	10.1977	20.1752	14.9102	25.3452	28.2191	14.1872	10.2763	25.0544	9.34067	11.9076	12.4644	3.5063	8.52177	1.87406	0.938367	22.6912	0	0.718526	0	287.805	219.51	4.91097	hepatocytes
chr1:193496278..193496293,-	0	0	0	0.161418	0	0.276372	0.488859	0.596357	0.840271	0.721382	0	0	0	0	0	0.233754	0.355074	0	0	0.64832	0	0.119754	0	11.1229	14.985	0	hepatocytes
chr1:193496333..193496342,+	0.386241	0	0.585964	0.564962	0	0.276372	1.46658	4.1745	2.8009	2.40461	1.17443	1.5659	0	0.290428	1.0387	0	0.532611	0	0	1.94496	0	1.07779	0	6.95182	4.86	0.377767	NA
chr1:193498689..193498695,-	0	0	0	2.66339	2.54942	3.0401	0.977719	2.38543	3.85124	2.88553	1.46804	2.19226	1.22904	1.16171	1.0387	0.467507	0.532611	0	0.938367	1.29664	0	0.239509	0	0	0	0	NA
chr1:193498964..193498983,-	1.73809	2.05911	0.781286	12.9134	5.41752	6.63294	3.17759	4.1745	4.13133	2.40461	1.76165	3.75816	0.245807	3.77557	1.0387	1.87003	4.26089	1.87406	0.938367	1.94496	5.10245	1.3173	2.07557	0	0.405	1.32218	NA
chr1:193498993..193499010,-	1.54497	1.76495	0.781286	6.61813	1.91207	1.93461	1.22215	2.68361	3.92126	2.88553	1.76165	3.75816	1.47484	2.90428	1.0387	0.935015	1.77537	0	0	1.94496	0	0.598771	2.07557	0	0	1.69995	NA
chr1:193499016..193499031,-	1.93121	1.76495	0.390643	5.89175	1.27471	1.93461	1.71101	0.894536	3.78122	1.68323	0.587216	1.25272	0.983229	0.871285	1.0387	0.467507	1.24276	0	0.469184	1.29664	0	0.718526	0	0	0	0.944416	NA
chr1:193499116..193499119,-	0.579362	0	0.195321	1.69489	0.956033	1.10549	0.24443	1.19271	1.47047	0.240461	0.293608	0.62636	0.737422	0.290428	0	0.233754	0.177537	0	0.469184	0	0	0.479017	0	0	0	0	NA
[truncated: 29,878 more rows]

## Sheet: Sup-table 3-early
chr1:104545791..104545809,-
chr1:114045155..114045202,-
chr1:133213546..133213553,-
chr1:141729859..141729864,-
chr1:150234298..150234303,+
chr1:160052665..160052677,-
chr1:164353302..164353313,-
chr1:167410526..167410541,-
chr1:167410781..167410795,-
chr1:168119722..168119739,-
chr1:171209037..171209043,-
chr1:172574255..172574271,-
chr1:174599407..174599412,+
chr1:183829072..183829091,+
chr1:20290097..20290103,-
chr1:43454672..43454696,-
chr1:43454895..43454913,-
chr1:43456193..43456204,-
chr1:56492839..56492870,-
chr1:60973569..60973604,+
chr1:60973608..60973638,+
chr1:62436002..62436024,+
chr1:62436134..62436169,+
chr1:72531701..72531734,-
chr1:72620076..72620090,+
chr1:74303888..74303901,+
chr1:75741082..75741103,+
chr10:14647141..14647143,-
chr10:2565042..2565047,+
chr10:6760489..6760499,-
chr11:18230970..18230981,-
chr11:18945751..18945759,+
chr11:19998937..19998976,+
chr11:6046774..6046789,+
chr12:15563196..15563220,+
chr12:19559410..19559416,+
chr12:9560417..9560422,-
chr13:10244642..10244648,-
chr13:7150701..7150711,+
chr14:14288070..14288087,-
chr14:6197318..6197332,-
chr15:6441613..6441631,-
chr15:8285205..8285218,+
chr17:953140..953156,-
chr17:953166..953200,-
chr17:958869..958883,-
chr18:4348367..4348381,+
chr18:7842248..7842266,+
chr18:9423772..9423781,-
chr19:9568430..9568438,+
chr2:108019535..108019540,+
chr2:120020653..120020660,-
chr2:122406443..122406448,+
chr2:136682142..136682162,-
chr2:136682165..136682178,-
chr2:137485233..137485262,-
chr2:145960575..145960587,-
chr2:148486905..148486911,-
chr2:22863508..22863517,-
chr2:30949361..30949364,+
chr2:3317767..3317783,-
chr2:3317786..3317804,-
chr2:38744146..38744159,-
chr2:3962571..3962606,-
chr2:46929414..46929431,-
chr2:51817546..51817553,+
chr2:52241163..52241194,-
chr2:569578..569593,+
chr2:65884515..65884526,-
chr2:65884541..65884553,-
chr2:65884600..65884623,-
chr2:70770336..70770348,+
chr2:71335563..71335575,+
chr2:81639458..81639470,+
chr2:93322157..93322165,+
chr20:10451016..10451031,+
chr20:12156534..12156554,-
chr20:12156558..12156572,-
chr20:12722426..12722501,+
chr20:13306165..13306184,+
chr20:13306242..13306269,+
chr20:3801655..3801666,-
chr22:588876..588882,-
chr23:1436350..1436356,+
chr25:1529973..1529982,+
chr28:1956983..1956988,+
chr28:2475398..2475399,-
chr3:105797592..105797620,+
chr3:18335171..18335187,+
chr3:19923211..19923227,+
chr3:2191304..2191320,+
chr3:2191448..2191465,+
chr3:2192664..2192684,+
chr3:22293041..22293052,-
chr3:2655016..2655053,-
chr3:35780180..35780197,+
chr3:35780224..35780236,+
chr3:42000920..42000933,+
chr3:4301756..4301763,+
chr3:45682948..45682955,-
chr3:46143683..46143703,+
chr3:46143704..46143728,+
chr3:54137538..54137555,+
chr3:54487454..54487468,+
chr3:57467660..57467674,-
chr3:58030366..58030397,+
chr3:63206972..63206996,+
chr3:63207221..63207242,+
chr3:9079634..9079650,+
chr4:10557118..10557144,+
chr4:12138383..12138390,+
chr4:13228083..13228124,-
chr4:16514869..16514892,+
chr4:19542079..19542091,+
chr4:23934122..23934142,+
chr4:28171360..28171374,-
chr4:34184306..34184326,+
chr4:35213148..35213173,+
chr4:69408514..69408519,-
chr4:69408955..69408962,+
chr4:71002501..71002522,+
chr4:71002536..71002555,+
chr4:73967661..73967697,-
chr4:84514590..84514602,+
chr4:86477614..86477620,+
chr5:32618011..32618015,-
chr5:34504649..34504653,-
chr5:55925772..55925789,+
chr5:7887962..7887982,-
chr5:7887994..7888013,-
chr6:18379148..18379169,-
chr6:21068485..21068503,+
chr6:21496422..21496438,+
chr6:21501839..21501856,-
chr6:21510024..21510042,-
chr6:23342968..23342983,+
chr6:25995042..25995060,+
chr6:5096114..5096129,-
chr6:5295987..5296000,+
chr6:5296016..5296032,+
chr7:28383638..28383667,-
chr7:29838819..29838841,+
chr7:29838854..29838870,+
chr7:5856189..5856198,-
chr7:9698209..9698221,+
chr8:11323417..11323426,+
chr8:14367902..14367909,-
chr8:20853316..20853329,+
chr8:28602350..28602399,+
chr9:15987828..15987833,-
chr9:19972682..19972700,+
chr9:3373467..3373479,-
chr9:5721507..5721521,-
chr9:8285470..8285486,-
chrW:2007484..2007491,+
chrW:4120116..4120129,-
chrZ:22220526..22220539,-
chrZ:30330858..30330877,-
chrZ:31016260..31016272,-
chrZ:40208076..40208091,-
chrZ:40208092..40208109,-
chrZ:42425587..42425605,-
chrZ:43172704..43172726,+
chrZ:43387613..43387647,-
chrZ:49542389..49542397,-
chrZ:49760592..49760625,-
chrZ:55458831..55458856,+
chrZ:57564940..57564947,+
chrZ:64978087..64978093,+
chrZ:70663590..70663599,+
chrZ:70663615..70663654,+
chrZ:7485879..7485893,-

## Sheet: Sup-table 3-mid
chr1:101036721..101036734,-
chr1:132572832..132572862,-
chr1:15438047..15438054,+
chr1:166992587..166992601,-
chr1:171332093..171332098,-
chr1:192016616..192016620,+
chr1:194563795..194563804,+
chr1:194563846..194563859,-
chr1:194575162..194575171,+
chr1:42702936..42702942,-
chr1:6323326..6323338,-
chr1:65511252..65511265,+
chr1:66881802..66881808,-
chr1:66883675..66883687,-
chr1:77703350..77703377,-
chr1:77703453..77703460,-
chr1:77703529..77703540,-
chr1:81478181..81478226,+
chr1:97238900..97238915,+
chr10:1134304..1134347,-
chr11:10092130..10092137,-
chr11:18839421..18839427,+
chr11:2664365..2664374,-
chr12:2454186..2454201,-
chr12:8936640..8936658,-
chr13:10021767..10021774,+
chr13:12133954..12133977,+
chr13:13011404..13011416,-
chr13:13011428..13011437,-
chr13:13425258..13425276,+
chr14:12157908..12157943,-
chr14:12157961..12157970,-
chr14:1317971..1318029,-
chr14:2566311..2566317,+
chr15:695166..695174,+
chr15:695186..695196,+
chr17:1001412..1001425,-
chr17:1992480..1992496,-
chr17:9242608..9242631,-
chr18:6685895..6685906,+
chr18:6713869..6713892,-
chr19:4839538..4839552,-
chr19:939608..939639,+
chr2:106472631..106472671,-
chr2:23895580..23895613,-
chr2:26730219..26730240,-
chr2:28032496..28032532,+
chr2:32302636..32302646,+
chr2:32679127..32679147,+
chr2:51310421..51310430,+
chr2:51765017..51765033,+
chr20:10681975..10681987,+
chr20:11098283..11098306,-
chr20:6889960..6889977,+
chr23:2099406..2099432,-
chr23:3226267..3226287,+
chr24:4218361..4218375,+
chr24:4300792..4300809,-
chr27:3783150..3783159,+
chr27:3786674..3786700,+
chr27:3796193..3796217,+
chr27:3797367..3797377,+
chr27:3812920..3812933,+
chr27:4975661..4975672,-
chr27:5507126..5507145,+
chr28:1642925..1642939,+
chr28:3552364..3552384,+
chr3:102693304..102693316,-
chr3:18887094..18887099,+
chr3:3222962..3222978,+
chr3:42230192..42230205,-
chr3:63404922..63404926,+
chr3:97754628..97754649,+
chr4:2331108..2331122,-
chr4:45977721..45977765,-
chr4:51205389..51205417,+
chr4:57670528..57670534,-
chr4:61141221..61141262,-
chr4:731892..731899,-
chr4:74159745..74159758,-
chr4:86535222..86535237,-
chr5:202503..202511,-
chr5:26364162..26364163,-
chr5:3488591..3488645,+
chr5:37212198..37212200,-
chr5:37766727..37766743,-
chr5:37971198..37971218,+
chr5:48489597..48489606,+
chr5:51595598..51595600,+
chr5:51906619..51906644,-
chr6:16990172..16990188,-
chr6:19133259..19133269,+
chr6:2749879..2749889,+
chr6:4471522..4471530,-
chr6:4490450..4490456,-
chr7:10251056..10251085,+
chr7:11437894..11437928,-
chr7:18831982..18831999,+
chr7:18933504..18933509,+
chr7:21251131..21251182,+
chr7:7157127..7157179,+
chr8:21558794..21558799,+
chr8:3706341..3706375,-
chr8:4263740..4263751,+
chr8:4327497..4327509,-
chr9:1383123..1383134,-
chr9:19787744..19787759,+
chr9:21044009..21044020,+
chr9:23550972..23550983,-
chr9:4596245..4596261,-
chr9:4596286..4596298,-
chr9:8028542..8028572,+
chr9:8028574..8028615,+
chr9:9518447..9518464,-
chrW:4732184..4732189,-
chrZ:60661189..60661210,+
chrZ:66154326..66154335,+
chrZ:7209394..7209412,-

## Sheet: Sup-table 3-mid-late
chr1:106631647..106631655,+
chr1:107073217..107073223,-
chr1:128370042..128370044,+
chr1:130666472..130666480,+
chr1:135506229..135506250,+
chr1:135506264..135506292,+
chr1:14969853..14969874,-
chr1:171552296..171552299,+
chr1:173156082..173156116,+
chr1:181945769..181945796,+
chr1:185100919..185100920,-
chr1:187970455..187970472,-
chr1:194563047..194563052,+
chr1:24517746..24517747,+
chr1:26968297..26968305,+
chr1:31400889..31400894,+
chr1:34203514..34203525,+
chr1:50527245..50527246,-
chr1:54341740..54341754,+
chr1:55118762..55118766,-
chr1:5726136..5726146,+
chr1:5726155..5726163,+
chr1:80414823..80414833,+
chr1:80414859..80414870,+
chr1:80414995..80415031,+
chr1:83167656..83167675,-
chr1:8667887..8667929,+
chr1:92260462..92260474,+
chr1:92951021..92951037,+
chr10:10511843..10511847,-
chr10:12900472..12900483,-
chr10:13091287..13091304,-
chr10:3974125..3974136,-
chr10:4676399..4676401,+
[truncated: 150 more rows]

[truncated: 10 more sheets: Sup-table 3-late, Sup-table 3-wing, Sup-table 3-leg, Sup-table 3-extraemb, Sup-table 3-hepatocytes, Sup-table 3-mesen, Sup-table 3-aortic, Sheet1, Sheet2, Sheet3]
