# Supplementary material for: Systematic analysis of transcription start sites in avian development
Source: PLoS Biol. 2017 Sep 5;15(9):e2002887. doi: 10.1371/journal.pbio.2002887 (PMC5600399; doi:10.1371/journal.pbio.2002887)
Supplement: S4 Table — This table lists all TSSs are highly active (>300TPM) in all samples. Many of them show high cross-sample variance. (XLSX) [file pbio.2002887.s016.xlsx]

## Sheet: Sup-table 4
Peak_ID	Ensembl_transcriptID	GeneSymbol	RefSeqID	mean_expression
chrM:1296..1305,+	ENSGALT00000065851.1	NA	NA	13724.4
chrM:2340..2355,+	ENSGALT00000082552.1	NA	NA	8731.64
chr14:4195522..4195533,-	ENSGALT00000015673.5	ACTB	NM_205518	7748.72
chr1:101041943..101041946,-	ENSGALT00000047298.1	NA	NA	7257.59
chrM:3324..3335,+	NA	NA	NA	6141.02
chr5:57721608..57721622,-	ENSGALT00000019972.5	RPS29	NM_001277880	5336.38
chr24:3073399..3073418,+	ENSGALT00000060234.1	HSPA8	NM_205003	4814.47
chrM:9095..9116,+	ENSGALT00000054361.1	MT-ATP8	NA	4663.81
chr1:123360105..123360115,-	ENSGALT00000043161.2	NA	NA	4026.16
chr5:16836793..16836809,-	ENSGALT00000011687.4	FTH1	NM_205086	3511.77
chr3:81786716..81786730,+	ENSGALT00000048718.1	EEF1A1	NM_001321516	3478.2
chr1:76952887..76952889,+	ENSGALT00000023323.5	GAPDH	NM_204305	3384.73
chr5:9732155..9732169,+	ENSGALT00000009566.4	RPL27A	NM_001277663	3253.73
chr22:4658885..4658897,+	ENSGALT00000044106.2	PPIA	NM_001166326	3168.96
chr2:145812302..145812317,+	ENSGALT00000049142.1	RPLP1	NM_205322	3034.48
chr27:4464974..4464978,-	ENSGALT00000072250.1	RPL23	NM_001321599	2937.61
chr8:20837586..20837596,+	ENSGALT00000016466.5	RPS8	NM_001252126	2799.81
chrM:13069..13081,+	ENSGALT00000047001.1	ND5	NA	2698.32
chr18:9281969..9281972,+	ENSGALT00000050490.1	NA	NM_001308613	2502.82
chr2:111562431..111562442,-	ENSGALT00000023311.5	RPS20	NA	2450.04
chr26:1137320..1137330,+	NA	NA	NA	2432.23
chr13:3282119..3282128,-	ENSGALT00000003436.5	NPM1	NM_205267	2359.94
chr1:112065366..112065381,+	ENSGALT00000026174.4	RPL8	NM_001277728	2346.8
chr19:5802114..5802124,+	ENSGALT00000006318.5	RPL23A	NA	2345.83
chrM:9916..9932,+	ENSGALT00000061564.1	COX3	NA	2286.36
chrM:9078..9092,+	ENSGALT00000054361.1	MT-ATP8	NA	2264.35
chr6:13157833..13157855,-	ENSGALT00000072914.1	RPS24	NM_001277342	2252.35
chrZ:63359041..63359060,+	ENSGALT00000063811.1	RPS23	NA	2157.7
chr21:3223863..3223874,-	ENSGALT00000003745.5	ENO1	NM_205120	2116.34
chr1:101040734..101040747,-	NA	NA	NA	2061.41
chr17:2051687..2051700,+	ENSGALT00000014314.5	RPL12	NM_001277679	2059.33
chr18:5120277..5120302,+	ENSGALT00000073143.1	NME2	NM_205047	1978.45
chr19:6585253..6585255,+	ENSGALT00000039524.3	NA	NA	1970.59
chr3:56965778..56965780,-	ENSGALT00000071633.1	RPS12	NM_001277911	1925.69
chr24:5636014..5636027,-	ENSGALT00000047120.1	RPS25	NA	1877.87
chrM:11189..11205,+	ENSGALT00000079811.1	ND4L	NA	1854.52
chr16:153725..153748,+	ENSGALT00000073944.1	RACK1	NM_001004378	1741.78
chr5:49571899..49571915,-	ENSGALT00000081964.1	HSP90AA1	NA	1678.35
chr4:33489936..33489960,+	ENSGALT00000059358.1	RPS3A	NM_001082417	1645.84
chr28:3101794..3101806,+	ENSGALT00000047585.1	CIRBP	NM_001031347	1612.24
chr3:94094312..94094339,+	ENSGALT00000026442.5	RPS7	NA	1566.34
chr27:5522065..5522083,+	ENSGALT00000039748.2	RPL27	NM_205337	1545.99
chr16:612510..612521,-	NA	NA	NA	1434.39
chr8:14104074..14104093,-	ENSGALT00000060043.1	RPL5	NA	1432.8
chr7:23460544..23460559,-	ENSGALT00000018702.3	RPL37A	NM_001079493	1432.1
chr1:167754990..167755003,-	ENSGALT00000059085.1	TPT1	NM_205398	1416.52
chr21:624177..624198,+	ENSGALT00000001015.5	RPL22	NM_204141	1416.35
chr28:875420..875436,-	ENSGALT00000041279.3	RPS28	NM_001302177	1398.36
chr4:27094758..27094787,+	NA	NA	NA	1355.48
chr4:16567047..16567064,+	ENSGALT00000039072.2	RPL39	NM_204272	1340.72
chr26:4130716..4130731,+	ENSGALT00000004168.5	RPL10A	NA	1304.04
chr1:129193734..129193751,+	ENSGALT00000047584.1	SLC25A6	NM_204231	1301.58
chr2:44514876..44514881,-	ENSGALT00000048858.1	RPSA	NM_001007823	1298.3
chr5:15786273..15786288,-	ENSGALT00000054226.1	RPLP2	NA	1277.07
chr1:194481153..194481166,-	ENSGALT00000036375.3	cRPS11	NM_001030833	1253.21
chr2:41322293..41322309,-	ENSGALT00000066490.1	RPL14	NA	1242.7
chr4:69714772..69714787,+	ENSGALT00000000206.5	RPL9	NM_001257333	1240.59
chr21:6414942..6414946,-	ENSGALT00000007741.5	YBX1	NM_204414	1237.53
chr14:8360811..8360841,-	ENSGALT00000010956.4	RPS15A	NA	1237.22
chr5:11745205..11745225,-	ENSGALT00000053220.1	RPS13	NM_001001783	1130.92
chr4:2042327..2042353,-	ENSGALT00000071143.1	NA	NA	1100.74
chr26:4376932..4376940,+	ENSGALT00000059324.1	RPS10	NM_001257297	1087.36
chr2:118161748..118161768,-	ENSGALT00000066511.1	RPL7	NM_001006345	1057.46
chr28:1449668..1449686,+	ENSGALT00000062006.1	EEF2	NM_205368	1039.29
chr7:12628813..12628827,-	ENSGALT00000013984.4	EEF1B2	NA	1016.05
chrM:8324..8339,+	ENSGALT00000054328.1	COII	NA	1014.81
chr9:16247507..16247521,+	ENSGALT00000014135.5	EIF4A2	NM_204549	978.879
chr1:85347355..85347367,-	ENSGALT00000024756.5	RPL24	NM_001321597	967.044
chr3:47709..47729,+	ENSGALT00000059625.1	RPS27A	NM_001287205	952.275
chr10:18534364..18534382,-	ENSGALT00000060334.1	RPL4	NM_001007479	916.436
chr13:9138197..9138204,+	ENSGALT00000004524.3	ribosomal protein L26 like 1	NM_001277099	915.915
chr28:3901536..3901560,-	ENSGALT00000046741.1	UBA52	NM_205075	899.113
chr25:2081190..2081208,+	ENSGALT00000050437.1	RPS27	NA	870.86
chrZ:33740951..33740957,-	ENSGALT00000024329.5	RPS6	NM_205225	868.077
chr17:10012202..10012230,-	ENSGALT00000057772.1	RPL35	NM_204273	833.518
chr5:43916843..43916870,+	ENSGALT00000045488.2	CALM	NM_001110364	830.617
chr12:19515729..19515741,-	ENSGALT00000013725.3	RPL32	NM_001252255	814.883
chrZ:12920941..12920951,-	ENSGALT00000053928.1	RPL37	NM_001122763	764.746
chr1:195225384..195225399,-	ENSGALT00000028006.4	RPS3	NM_001030836	739.473
