# Supplementary material for: Systematic analysis of transcription start sites in avian development
Source: PLoS Biol. 2017 Sep 5;15(9):e2002887. doi: 10.1371/journal.pbio.2002887 (PMC5600399; doi:10.1371/journal.pbio.2002887)
Supplement: S7 Table — This table lists enriched gene ontology terms associated with the chicken housekeeping genes. GO term column: Specific GO term with GO number. Ontology column: Category of ontology term. C: Cellular component; F: Molecular function; P: Biological process. GO terms are listed in the order of enrichment (high to low) for each of the three categories. (XLSX) [file pbio.2002887.s019.xlsx]

## Sheet: Sup-table 7
GO term	Ontology	Description	Number in input list	Number in BG/Ref	Sup	FDR
GO:0030529	C	ribonucleoprotein complex	158	355	1.5e-51	2.5e-48
GO:0005840	C	ribosome	80	117	4.6e-46	3.8e-43
GO:0033279	C	ribosomal subunit	70	97	4e-43	2.2e-40
GO:0022626	C	cytosolic ribosome	53	61	6.6e-41	2.7e-38
GO:0032991	C	macromolecular complex	443	1990	1e-32	3.4e-30
GO:0044445	C	cytosolic part	66	118	1.1e-30	2.9e-28
GO:0015935	C	small ribosomal subunit	33	41	6e-24	1.4e-21
GO:0015934	C	large ribosomal subunit	39	58	4.3e-23	8.9e-21
GO:0044429	C	mitochondrial part	106	324	6.5e-23	1.2e-20
GO:0022627	C	cytosolic small ribosomal subunit	25	26	1e-22	1.7e-20
GO:0070469	C	respiratory chain	30	37	4.4e-22	6.6e-20
GO:0044446	C	intracellular organelle part	549	2933	1e-21	1.4e-19
GO:0044422	C	organelle part	549	2949	2.9e-21	3.6e-19
GO:0005743	C	mitochondrial inner membrane	70	177	4.7e-21	5.2e-19
GO:0022625	C	cytosolic large ribosomal subunit	28	34	4.7e-21	5.2e-19
GO:0005740	C	mitochondrial envelope	83	246	2e-19	2.1e-17
GO:0005746	C	mitochondrial respiratory chain	26	32	2.3e-19	2.2e-17
GO:0019866	C	organelle inner membrane	72	200	6.7e-19	6.2e-17
GO:0044455	C	mitochondrial membrane part	40	76	4.1e-18	3.6e-16
GO:0044444	C	cytoplasmic part	571	3226	7.2e-18	5.9e-16
GO:0005739	C	mitochondrion	167	712	1.5e-17	1.2e-15
GO:0031966	C	mitochondrial membrane	76	230	2.1e-17	1.6e-15
GO:0005829	C	cytosol	253	1254	3.4e-16	2.4e-14
GO:0031090	C	organelle membrane	186	857	1e-15	6.9e-14
GO:0031975	C	envelope	105	396	1.4e-15	8.7e-14
GO:0031967	C	organelle envelope	105	396	1.4e-15	8.7e-14
GO:0031974	C	membrane-enclosed lumen	293	1532	3.3e-15	2e-13
GO:0043234	C	protein complex	314	1690	1.8e-14	1.1e-12
GO:0005737	C	cytoplasm	659	3981	2e-14	1.1e-12
GO:0070013	C	intracellular organelle lumen	285	1511	3.2e-14	1.7e-12
GO:0043233	C	organelle lumen	285	1511	3.2e-14	1.7e-12
GO:0005681	C	spliceosomal complex	36	78	3.5e-14	1.8e-12
GO:0065010	C	extracellular membrane-bounded organelle	212	1057	6.4e-14	3.1e-12
GO:0043230	C	extracellular organelle	212	1057	6.4e-14	3.1e-12
GO:0070062	C	extracellular vesicular exosome	211	1056	1e-13	4.9e-12
GO:0005925	C	focal adhesion	54	165	9.1e-13	4.2e-11
GO:0005924	C	cell-substrate adherens junction	54	168	2e-12	9.1e-11
GO:0031988	C	membrane-bounded vesicle	235	1246	2.3e-12	1e-10
GO:0030055	C	cell-substrate junction	54	170	3.4e-12	1.4e-10
GO:0071013	C	catalytic step 2 spliceosome	25	47	4.7e-12	1.9e-10
GO:0044428	C	nuclear part	292	1641	1e-11	4.1e-10
GO:0000502	C	proteasome complex	20	32	1.1e-11	4.2e-10
GO:0045271	C	respiratory chain complex I	16	21	1.2e-11	4.4e-10
GO:0030964	C	NADH dehydrogenase complex	16	21	1.2e-11	4.4e-10
GO:0005747	C	mitochondrial respiratory chain complex I	16	21	1.2e-11	4.4e-10
GO:0043231	C	intracellular membrane-bounded organelle	645	4073	2.1e-11	7.5e-10
GO:0031982	C	vesicle	239	1304	2.4e-11	8.6e-10
GO:0043209	C	myelin sheath	33	81	2.6e-11	9e-10
GO:0043229	C	intracellular organelle	703	4496	3.8e-11	1.3e-09
GO:0031981	C	nuclear lumen	251	1403	9.3e-11	3.1e-09
GO:0043227	C	membrane-bounded organelle	700	4574	7.4e-10	2.4e-08
GO:0005912	C	adherens junction	54	202	3.9e-09	1.2e-07
GO:0000313	C	organellar ribosome	20	41	4.5e-09	1.3e-07
GO:0044424	C	intracellular part	791	5293	4.5e-09	1.3e-07
GO:0005761	C	mitochondrial ribosome	20	41	4.5e-09	1.3e-07
GO:0043226	C	organelle	739	4925	5.3e-09	1.6e-07
GO:0016323	C	basolateral plasma membrane	54	206	8.1e-09	2.3e-07
GO:0043232	C	intracellular non-membrane-bounded organelle	233	1363	1.4e-08	3.8e-07
GO:0070161	C	anchoring junction	54	209	1.4e-08	3.8e-07
GO:0043228	C	non-membrane-bounded organelle	233	1363	1.4e-08	3.8e-07
GO:0031980	C	mitochondrial lumen	32	98	3.1e-08	8.4e-07
GO:0005759	C	mitochondrial matrix	32	98	3.1e-08	8.4e-07
GO:0005634	C	nucleus	398	2541	3.6e-08	9.4e-07
GO:0030532	C	small nuclear ribonucleoprotein complex	15	27	3.9e-08	1e-06
GO:0022624	C	proteasome accessory complex	11	15	4.3e-08	1.1e-06
GO:0005622	C	intracellular	804	5511	7.9e-08	2e-06
GO:0005654	C	nucleoplasm	199	1169	1.4e-07	3.4e-06
GO:0005730	C	nucleolus	74	346	2.2e-07	5.4e-06
GO:0005838	C	proteasome regulatory particle	10	14	2.7e-07	6.5e-06
GO:0005839	C	proteasome core complex	8	10	1.1e-06	2.7e-05
GO:0005684	C	U2-type spliceosomal complex	10	16	1.7e-06	4e-05
GO:0005844	C	polysome	11	20	3e-06	6.9e-05
GO:0005685	C	U1 snRNP	8	11	3.7e-06	8.5e-05
GO:0031970	C	organelle envelope lumen	13	29	7.3e-06	0.00016
GO:0005689	C	U12-type spliceosomal complex	10	18	7.6e-06	0.00017
GO:0044432	C	endoplasmic reticulum part	51	236	9.6e-06	0.00021
GO:0071010	C	prespliceosome	8	12	1e-05	0.00022
GO:0030117	C	membrane coat	15	39	1.4e-05	0.0003
GO:0048475	C	coated membrane	15	39	1.4e-05	0.0003
GO:0044421	C	extracellular region part	222	1431	1.8e-05	0.00037
GO:0000314	C	organellar small ribosomal subunit	9	16	1.9e-05	0.00039
GO:0005763	C	mitochondrial small ribosomal subunit	9	16	1.9e-05	0.00039
GO:0005687	C	U4 snRNP	5	5	2e-05	0.0004
GO:0031595	C	nuclear proteasome complex	5	5	2e-05	0.0004
GO:0071212	C	subsynaptic reticulum	52	250	2.4e-05	0.00046
GO:0005758	C	mitochondrial intermembrane space	11	24	2.9e-05	0.00055
GO:0012505	C	endomembrane system	102	591	4.4e-05	0.00083
GO:0005793	C	ER-Golgi intermediate compartment	12	31	9.5e-05	0.0018
GO:0034709	C	methylosome	5	6	0.00011	0.002
GO:0005751	C	mitochondrial respiratory chain complex IV	5	6	0.00011	0.002
GO:0000315	C	organellar large ribosomal subunit	10	23	0.00011	0.0021
GO:0005762	C	mitochondrial large ribosomal subunit	10	23	0.00011	0.0021
GO:0071011	C	precatalytic spliceosome	7	12	0.00013	0.0022
GO:0045259	C	proton-transporting ATP synthase complex	6	9	0.00014	0.0025
GO:0005753	C	mitochondrial proton-transporting ATP synthase complex	6	9	0.00014	0.0025
GO:0044451	C	nucleoplasm part	92	540	0.00015	0.0025
GO:0010008	C	endosome membrane	23	89	0.00016	0.0026
GO:0005789	C	endoplasmic reticulum membrane	43	210	0.00016	0.0026
GO:0005768	C	endosome	52	273	0.00024	0.0041
GO:0044440	C	endosomal part	23	92	0.00026	0.0043
GO:0042175	C	nuclear envelope-endoplasmic reticulum network	43	215	0.00027	0.0044
GO:0016469	C	proton-transporting two-sector ATPase complex	9	21	0.00029	0.0047
GO:0071004	C	U2-type prespliceosome	6	10	0.00033	0.0051
GO:0016607	C	nuclear speck	31	141	0.00033	0.0051
GO:0005686	C	U2 snRNP	6	10	0.00033	0.0051
GO:0045277	C	respiratory chain complex IV	5	7	0.00035	0.0053
GO:0005852	C	eukaryotic translation initiation factor 3 complex	5	7	0.00035	0.0053
GO:0008540	C	proteasome regulatory particle, base subcomplex	5	7	0.00035	0.0053
GO:0000276	C	mitochondrial proton-transporting ATP synthase complex, coupling factor F(o)	5	7	0.00035	0.0053
GO:0016604	C	nuclear body	51	272	0.0004	0.0061
GO:0030120	C	vesicle coat	9	22	0.00044	0.0065
GO:0045335	C	phagocytic vesicle	11	31	0.00045	0.0066
GO:0016591	C	DNA-directed RNA polymerase II, holoenzyme	15	52	0.00059	0.0086
GO:0005576	C	extracellular region	222	1528	0.0006	0.0087
GO:0033177	C	proton-transporting two-sector ATPase complex, proton-transporting domain	7	15	0.00075	0.011
GO:0045263	C	proton-transporting ATP synthase complex, coupling factor F(o)	5	8	0.00084	0.012
GO:0008250	C	oligosaccharyltransferase complex	5	8	0.00084	0.012
GO:0031201	C	SNARE complex	9	24	0.00093	0.013
GO:0034708	C	methyltransferase complex	10	29	0.001	0.014
GO:0030118	C	clathrin coat	7	16	0.0012	0.016
GO:0010494	C	stress granule	7	17	0.0018	0.025
GO:0005868	C	cytoplasmic dynein complex	6	13	0.002	0.026
GO:0030904	C	retromer complex	6	13	0.002	0.026
GO:0000932	C	cytoplasmic mRNA processing body	12	42	0.0022	0.029
GO:0034719	C	SMN-Sm protein complex	5	10	0.0031	0.04
GO:0008180	C	signalosome	6	14	0.0031	0.04
GO:0031902	C	late endosome membrane	6	14	0.0031	0.04
GO:0005783	C	endoplasmic reticulum	78	496	0.0037	0.048
GO:0030139	C	endocytic vesicle	14	56	0.0039	0.049
GO:0031410	C	cytoplasmic vesicle	53	316	0.0039	0.05
GO:0003723	F	RNA binding	234	635	1.7e-55	2.2e-52
GO:0003735	F	structural constituent of ribosome	68	91	1.3e-43	8.5e-41
GO:0005198	F	structural molecule activity	82	248	1.3e-18	5.8e-16
GO:0003676	F	nucleic acid binding	293	1455	5.7e-18	1.9e-15
GO:0003729	F	mRNA binding	30	81	3e-09	8e-07
GO:0008135	F	translation factor activity, nucleic acid binding	18	34	4.9e-09	9.8e-07
GO:0003954	F	NADH dehydrogenase activity	12	16	6.6e-09	9.8e-07
GO:0050136	F	NADH dehydrogenase (quinone) activity	12	16	6.6e-09	9.8e-07
GO:0008137	F	NADH dehydrogenase (ubiquinone) activity	12	16	6.6e-09	9.8e-07
GO:0003743	F	translation initiation factor activity	14	23	2.2e-08	3e-06
GO:0015078	F	hydrogen ion transmembrane transporter activity	19	41	3.1e-08	3.8e-06
GO:0009055	F	electron carrier activity	11	16	1.2e-07	1.3e-05
GO:0019843	F	rRNA binding	12	19	1.3e-07	1.3e-05
GO:0015077	F	monovalent inorganic cation transmembrane transporter activity	19	45	1.9e-07	1.9e-05
GO:0016655	F	oxidoreductase activity, acting on NADH or NADPH, quinone or similar compound as acceptor	12	21	6.1e-07	5.4e-05
GO:0070003	F	threonine-type peptidase activity	7	10	2.4e-05	0.0019
GO:0004298	F	threonine-type endopeptidase activity	7	10	2.4e-05	0.0019
GO:0019003	F	GDP binding	11	25	4.6e-05	0.0034
GO:0051082	F	unfolded protein binding	14	39	6.7e-05	0.0047
GO:0016651	F	oxidoreductase activity, acting on NADH or NADPH	14	40	9.2e-05	0.0062
GO:0008565	F	protein transporter activity	14	41	0.00013	0.008
GO:0031489	F	myosin V binding	5	7	0.00035	0.02
GO:0045296	F	cadherin binding	26	111	0.00033	0.02
GO:0022890	F	inorganic cation transmembrane transporter activity	21	84	0.00047	0.026
GO:0043021	F	ribonucleoprotein binding	12	37	0.00064	0.026
GO:0016676	F	oxidoreductase activity, acting on heme group of donors, oxygen as acceptor	6	11	0.00065	0.026
GO:0017025	F	TATA-binding protein binding	6	11	0.00065	0.026
GO:0015002	F	heme-copper terminal oxidase activity	6	11	0.00065	0.026
GO:0016675	F	oxidoreductase activity, acting on heme group of donors	6	11	0.00065	0.026
GO:0004129	F	cytochrome-c oxidase activity	6	11	0.00065	0.026
GO:0004812	F	aminoacyl-tRNA ligase activity	10	27	0.00055	0.026
GO:0016875	F	ligase activity, forming carbon-oxygen bonds	10	27	0.00055	0.026
GO:0016876	F	ligase activity, forming aminoacyl-tRNA and related compounds	10	27	0.00055	0.026
GO:0006412	P	translation	126	273	4.9e-44	4e-40
GO:0006396	P	RNA processing	96	333	6.3e-17	2.6e-13
GO:0016071	P	mRNA metabolic process	69	205	1.8e-16	5.1e-13
GO:0006397	P	mRNA processing	58	157	3.3e-16	6.7e-13
GO:0022613	P	ribonucleoprotein complex biogenesis	59	171	6.5e-15	8.9e-12
GO:0010467	P	gene expression	344	1868	6.3e-15	8.9e-12
GO:0006119	P	oxidative phosphorylation	23	35	6.3e-14	6.1e-11
GO:0022900	P	electron transport chain	22	32	5.3e-14	6.1e-11
GO:0010608	P	posttranscriptional regulation of gene expression	66	213	6.7e-14	6.1e-11
GO:0044267	P	cellular protein metabolic process	329	1814	1.1e-13	9.2e-11
GO:0015031	P	protein transport	111	458	1.5e-13	1.2e-10
GO:0000375	P	RNA splicing, via transesterification reactions	39	95	3.5e-13	2e-10
GO:0000377	P	RNA splicing, via transesterification reactions with bulged adenosine as nucleophile	39	95	3.5e-13	2e-10
GO:0000398	P	nuclear mRNA splicing, via spliceosome	39	95	3.5e-13	2e-10
GO:0022904	P	respiratory electron transport chain	20	29	6.8e-13	3.7e-10
GO:0070972	P	protein localization in endoplasmic reticulum	16	19	7.2e-13	3.7e-10
GO:0022618	P	ribonucleoprotein complex assembly	34	77	8.5e-13	4.1e-10
GO:0006417	P	regulation of translation	39	98	1.1e-12	5.1e-10
GO:0046907	P	intracellular transport	127	571	2.3e-12	9.9e-10
GO:0045333	P	cellular respiration	26	50	3.5e-12	1.5e-09
GO:0045184	P	establishment of protein localization	117	521	7.4e-12	2.8e-09
GO:0045047	P	protein targeting to ER	14	16	7.4e-12	2.8e-09
GO:0019538	P	protein metabolic process	348	2015	9.8e-12	3.5e-09
GO:0008380	P	RNA splicing	43	122	1e-11	3.5e-09
GO:0006091	P	generation of precursor metabolites and energy	44	128	1.6e-11	5.2e-09
GO:0034621	P	cellular macromolecular complex subunit organization	91	376	1.8e-11	5.6e-09
GO:0042773	P	ATP synthesis coupled electron transport	15	19	2.2e-11	6.7e-09
GO:0006886	P	intracellular protein transport	81	326	4.9e-11	1.5e-08
GO:0042775	P	mitochondrial ATP synthesis coupled electron transport	13	15	5.5e-11	1.6e-08
GO:0070727	P	cellular macromolecule localization	97	424	1.1e-10	3.2e-08
GO:0034613	P	cellular protein localization	96	420	1.5e-10	3.9e-08
GO:0034622	P	cellular macromolecular complex assembly	78	317	1.7e-10	4.5e-08
GO:0008104	P	protein localization	134	661	4.1e-10	1e-07
GO:0006612	P	protein targeting to membrane	18	31	6.5e-10	1.6e-07
GO:0006605	P	protein targeting	52	191	3.7e-09	8.8e-07
GO:0030163	P	protein catabolic process	76	330	6.3e-09	1.5e-06
GO:0033036	P	macromolecule localization	147	775	6.6e-09	1.5e-06
GO:0006413	P	translational initiation	20	43	1.3e-08	2.7e-06
GO:0015980	P	energy derivation by oxidation of organic compounds	29	82	1.8e-08	3.8e-06
GO:0044260	P	cellular macromolecule metabolic process	478	3098	2.1e-08	4.4e-06
GO:0006613	P	cotranslational protein targeting to membrane	10	12	2.2e-08	4.5e-06
GO:0009057	P	macromolecule catabolic process	99	481	2.3e-08	4.5e-06
GO:0042254	P	ribosome biogenesis	35	112	2.7e-08	5.1e-06
GO:0007005	P	mitochondrion organization	42	158	2.1e-07	3.9e-05
GO:0044265	P	cellular macromolecule catabolic process	86	422	2.5e-07	4.5e-05
GO:0044257	P	cellular protein catabolic process	65	293	2.8e-07	4.9e-05
GO:0043170	P	macromolecule metabolic process	506	3382	2.8e-07	4.9e-05
GO:0051603	P	proteolysis involved in cellular protein catabolic process	64	289	3.6e-07	6.2e-05
GO:0043933	P	macromolecular complex subunit organization	114	608	3.8e-07	6.5e-05
GO:0034645	P	cellular macromolecule biosynthetic process	259	1616	5.3e-07	8.7e-05
GO:0006511	P	ubiquitin-dependent protein catabolic process	55	240	7e-07	0.00011
GO:0009059	P	macromolecule biosynthetic process	260	1631	7.5e-07	0.00012
GO:0051649	P	establishment of localization in cell	145	827	8.3e-07	0.00013
GO:0051641	P	cellular localization	162	944	8.5e-07	0.00013
GO:0019941	P	modification-dependent protein catabolic process	55	242	9.2e-07	0.00014
GO:0034660	P	ncRNA metabolic process	44	178	9.6e-07	0.00014
GO:0006614	P	SRP-dependent cotranslational protein targeting to membrane	8	10	1.1e-06	0.00016
GO:0043632	P	modification-dependent macromolecule catabolic process	55	245	1.4e-06	0.0002
GO:0042257	P	ribosomal subunit assembly	9	13	1.7e-06	0.00023
GO:0006457	P	protein folding	23	70	2.2e-06	0.0003
GO:0009056	P	catabolic process	130	739	2.2e-06	0.0003
GO:0065003	P	macromolecular complex assembly	101	544	2.3e-06	0.00031
GO:0042255	P	ribosome assembly	10	17	3.8e-06	0.00049
GO:0044248	P	cellular catabolic process	118	666	4.1e-06	0.00052
GO:0000470	P	maturation of LSU-rRNA	9	14	4.2e-06	0.00053
GO:0006364	P	rRNA processing	25	84	6.1e-06	0.00076
GO:0033365	P	protein localization in organelle	42	180	7.7e-06	0.00095
GO:0044237	P	cellular metabolic process	559	3927	1.3e-05	0.0016
GO:0016072	P	rRNA metabolic process	25	88	1.5e-05	0.0018
GO:0006620	P	posttranslational protein targeting to membrane	5	5	2e-05	0.0023
GO:0006123	P	mitochondrial electron transport, cytochrome c to oxygen	5	5	2e-05	0.0023
GO:0006122	P	mitochondrial electron transport, ubiquinol to cytochrome c	5	5	2e-05	0.0023
GO:0051789	P	response to protein stimulus	19	60	2.9e-05	0.0032
GO:0006446	P	regulation of translational initiation	11	24	2.9e-05	0.0032
GO:0034470	P	ncRNA processing	34	142	2.9e-05	0.0032
GO:0007030	P	Golgi organization	15	42	4e-05	0.0044
GO:0016070	P	RNA metabolic process	219	1431	4.3e-05	0.0046
GO:0050821	P	protein stabilization	16	47	4.4e-05	0.0046
GO:0007006	P	mitochondrial membrane organization	10	21	4.4e-05	0.0046
GO:0031647	P	regulation of protein stability	23	84	6e-05	0.0062
GO:0048193	P	Golgi vesicle transport	26	101	6.5e-05	0.0067
GO:0009060	P	aerobic respiration	10	22	7.2e-05	0.0072
GO:0045727	P	positive regulation of translation	10	22	7.2e-05	0.0072
GO:0010498	P	proteasomal protein catabolic process	36	161	8.1e-05	0.008
GO:0006515	P	misfolded or incompletely synthesized protein catabolic process	14	40	9.2e-05	0.009
GO:0006754	P	ATP biosynthetic process	8	15	9.5e-05	0.009
GO:0017148	P	negative regulation of translation	12	31	9.5e-05	0.009
GO:0043161	P	proteasomal ubiquitin-dependent protein catabolic process	35	157	0.00011	0.01
GO:0006996	P	organelle organization	182	1182	0.00011	0.01
GO:0006376	P	mRNA splice site selection	7	12	0.00013	0.012
GO:0051246	P	regulation of protein metabolic process	97	573	0.00013	0.012
GO:0071445	P	cellular response to protein stimulus	17	56	0.00013	0.012
GO:0008152	P	metabolic process	599	4348	0.00014	0.012
GO:0051788	P	response to misfolded protein	13	37	0.00016	0.014
GO:0071218	P	cellular response to misfolded protein	13	37	0.00016	0.014
GO:0006418	P	tRNA aminoacylation for protein translation	11	28	0.00016	0.014
GO:0042274	P	ribosomal small subunit biogenesis	8	16	0.00017	0.015
GO:0030490	P	maturation of SSU-rRNA	12	33	0.00019	0.016
GO:0044085	P	cellular component biogenesis	141	896	0.0002	0.016
GO:0051168	P	nuclear export	16	53	0.00022	0.018
GO:0000387	P	spliceosomal snRNP assembly	8	17	0.00029	0.024
GO:0006508	P	proteolysis	85	502	0.0003	0.024
GO:0007007	P	inner mitochondrial membrane organization	6	10	0.00033	0.025
GO:0015985	P	energy coupled proton transport, down electrochemical gradient	6	10	0.00033	0.025
GO:0015986	P	ATP synthesis coupled proton transport	6	10	0.00033	0.025
GO:0043039	P	tRNA aminoacylation	11	30	0.00032	0.025
GO:0035308	P	negative regulation of protein amino acid dephosphorylation	5	7	0.00035	0.026
GO:0035305	P	negative regulation of dephosphorylation	5	7	0.00035	0.026
GO:0000028	P	ribosomal small subunit assembly	5	7	0.00035	0.026
GO:0032268	P	regulation of cellular protein metabolic process	87	519	0.00036	0.027
GO:0030433	P	ER-associated protein catabolic process	12	35	0.00036	0.027
GO:0044249	P	cellular biosynthetic process	292	2046	0.0004	0.03
GO:0000462	P	maturation of SSU-rRNA from tricistronic rRNA transcript (SSU-rRNA, 5.8S rRNA, LSU-rRNA)	9	22	0.00044	0.032
GO:0043038	P	amino acid activation	11	31	0.00045	0.032
GO:0009206	P	purine ribonucleoside triphosphate biosynthetic process	8	18	0.00047	0.034
GO:0006888	P	ER to Golgi vesicle-mediated transport	12	36	0.00048	0.034
GO:0051656	P	establishment of organelle localization	19	73	0.0005	0.035
GO:0009058	P	biosynthetic process	296	2086	0.00052	0.036
GO:0043254	P	regulation of protein complex assembly	26	115	0.00059	0.041
GO:0006099	P	tricarboxylic acid cycle	6	11	0.00065	0.044
GO:0048024	P	regulation of nuclear mRNA splicing, via spliceosome	9	23	0.00065	0.044
GO:0033119	P	negative regulation of RNA splicing	6	11	0.00065	0.044
GO:0009145	P	purine nucleoside triphosphate biosynthetic process	8	19	0.00073	0.049
